# Supplementary material
Source: publisher site journal article supplement (https://www.spandidos-publications.com/2744/downloadSupplementary)
Supplement: Supplementary file 1 [file downloadSupplementary]

## Sheet: Sheet1
Table SII. Protein identification & quantification. WKY, Wistar‑Kyoto; M, model; TRFM, twirling reinforcing manipulation; TRDM, twirling reducing manipulation; EA, electroacupuncture.
Accession	Description	TRFM			EA	EQ14	EQ15	M	MQ14	MQ15	WKY	WKYQ14	WKYQ15	TRDM	XQ14	XQ15
A0A0G2K1Y8	Spectrin alpha chain, non-erythrocytic 1 OS=Rattus norvegicus OX=10116 GN=Sptan1 PE=1 SV=1	3.74646e+08	3.93529e+08	3.72657e+08	3.41693e+08	3.73348e+08	3.83426e+08	2.55537e+08	3.15098e+08	3.45797e+08	3.95519e+08	3.59435e+08	2.9711e+08	3.78503e+08	3.64242e+08	3.82114e+08
Q6IRK8	Spectrin alpha chain, non-erythrocytic 1 OS=Rattus norvegicus OX=10116 GN=Sptan1 PE=1 SV=1	1.13982e+07	4.82584e+07	1.05338e+07	2.40482e+07	1.71981e+07	3.8609e+07	1.03685e+07	29375293	2.55744e+07	3.43408e+07	7.47055e+06	2.01698e+07	2.91604e+07	1.28906e+07	1.6542e+07
A0A0G2K8W9	Spectrin beta chain OS=Rattus norvegicus OX=10116 GN=Sptbn1 PE=1 SV=1	1.5559e+10	1.62616e+10	1.69303e+10	1.62852e+10	1.54821e+10	1.51438e+10	1.50747e+10	1.54255e+10	1.58135e+10	1.60942e+10	1.55466e+10	1.63945e+10	1.59503e+10	1.60562e+10	1.63794e+10
M0R9X8	Cytoplasmic dynein 1 heavy chain 1 OS=Rattus norvegicus OX=10116 GN=Dync1h1 PE=1 SV=2	7.26239e+09	7.49001e+09	7.52918e+09	7.40144e+09	7.2622e+09	6.84452e+09	7.43834e+09	7.40245e+09	7.16296e+09	7.45216e+09	7.22608e+09	7.55491e+09	7.50207e+09	7.39921e+09	7.66522e+09
F1M779	Clathrin heavy chain OS=Rattus norvegicus OX=10116 GN=Cltc PE=1 SV=1	2.25953e+10	2.32307e+10	2.27472e+10	2.18479e+10	2.36609e+10	2.17575e+10	2.23845e+10	2.13105e+10	2.39023e+10	2.56338e+10	2.40569e+10	2.2956e+10	2.32119e+10	2.17231e+10	2.24104e+10
F1LNK0	Microtubule-associated protein OS=Rattus norvegicus OX=10116 GN=Map2 PE=1 SV=3	1.17535e+10	1.17361e+10	1.30041e+10	1.13182e+10	1.06822e+10	1.08431e+10	1.1716e+10	1.10121e+10	1.18809e+10	1.24495e+10	1.17435e+10	1.06653e+10	1.19947e+10	1.15637e+10	1.24779e+10
F1LM42	Ankyrin 2 OS=Rattus norvegicus OX=10116 GN=Ank2 PE=1 SV=3	8.36632e+08	8.09565e+08	8.1543e+08	8.80756e+08	8.42187e+08	8.12763e+08	8.23989e+08	7.80938e+08	9.93244e+08	8.05149e+08	7.97238e+08	7.51606e+08	8.01708e+08	7.31197e+08	9.40532e+08
Q6S3A3	Plectin OS=Rattus norvegicus OX=10116 GN=Plec PE=1 SV=1	3.60293e+09	3.81933e+09	3.48024e+09	3.8269e+09	3.62712e+09	3.89337e+09	3.65277e+09	3.76276e+09	3.02314e+09	3.9728e+09	3.28059e+09	3.82611e+09	3.52859e+09	3.85013e+09	3.80424e+09
A0A0G2K5C6	Microtubule-associated protein 1A OS=Rattus norvegicus OX=10116 GN=Map1a PE=1 SV=1	4.2096e+09	4.41598e+09	4.78308e+09	4.30951e+09	4.11663e+09	4.33719e+09	4.25786e+09	4.30342e+09	5.56633e+09	3.86798e+09	4.10524e+09	4.28847e+09	4.39264e+09	3.9321e+09	4.30601e+09
G3V9Y1	Myosin, heavy polypeptide 10, non-muscle, isoform CRA_b OS=Rattus norvegicus OX=10116 GN=Myh10 PE=1 SV=1	1.43999e+09	1.45352e+09	1.47152e+09	1.39665e+09	1.40465e+09	1.40598e+09	1.41822e+09	1.44394e+09	1.52384e+09	1.37764e+09	1.40219e+09	1.39664e+09	1.43968e+09	1.41611e+09	1.42479e+09
F1LRL9	Microtubule-associated protein 1B OS=Rattus norvegicus OX=10116 GN=Map1b PE=1 SV=1	3.52881e+09	3.51509e+09	4.02239e+09	3.66865e+09	3.61371e+09	3.71887e+09	3.37553e+09	3.42143e+09	3.77538e+09	3.83117e+09	3.68852e+09	3.6584e+09	3.62482e+09	3.54165e+09	3.76583e+09
A0A0G2JZ56	Ankyrin 2 OS=Rattus norvegicus OX=10116 GN=Ank2 PE=1 SV=1	3.30148e+08	2.83714e+08	2.95912e+08	2.75123e+08	2.92226e+08	2.86951e+08	2.85791e+08	2.43814e+08	3.38736e+08	2.94301e+08	2.37374e+08	2.59524e+08	2.92423e+08	2.56393e+08	2.57606e+08
P06687	Sodium/potassium-transporting ATPase subunit alpha-3 OS=Rattus norvegicus OX=10116 GN=Atp1a3 PE=1 SV=2	3.20192e+10	3.3112e+10	3.36097e+10	3.24266e+10	3.14497e+10	3.08784e+10	3.27265e+10	3.10319e+10	3.25701e+10	2.95733e+10	3.2178e+10	3.22625e+10	3.39134e+10	3.19134e+10	3.29016e+10
P12785	Fatty acid synthase OS=Rattus norvegicus OX=10116 GN=Fasn PE=1 SV=3	2.86128e+09	3.00106e+09	2.91466e+09	2.87055e+09	2.81108e+09	2.89695e+09	2.82929e+09	2.83948e+09	2.51618e+09	2.83306e+09	2.58438e+09	2.95059e+09	2.9882e+09	2.98105e+09	3.00418e+09
F1MA36	Spectrin beta chain OS=Rattus norvegicus OX=10116 GN=Sptbn2 PE=1 SV=2	1.21076e+09	1.18942e+09	1.19824e+09	1.21011e+09	1.06877e+09	1.10244e+09	1.14942e+09	1.16547e+09	1.81621e+09	1.30034e+09	1.24645e+09	1.12069e+09	1.23451e+09	1.18801e+09	1.18317e+09
P06686	Sodium/potassium-transporting ATPase subunit alpha-2 OS=Rattus norvegicus OX=10116 GN=Atp1a2 PE=1 SV=1	1.25362e+10	1.33023e+10	1.32707e+10	1.26496e+10	1.24342e+10	1.32196e+10	1.2348e+10	1.21144e+10	9.98575e+09	1.15881e+10	1.26842e+10	1.21083e+10	1.24312e+10	1.20503e+10	1.25463e+10
P47942	Dihydropyrimidinase-related protein 2 OS=Rattus norvegicus OX=10116 GN=Dpysl2 PE=1 SV=1	2.4194e+10	2.51537e+10	2.25679e+10	2.39599e+10	2.47501e+10	2.35952e+10	2.45781e+10	22902516358	2.73711e+10	2.7084e+10	2.66416e+10	2.63438e+10	2.46827e+10	2.4452e+10	2.35484e+10
G3V6D3	ATP synthase subunit beta OS=Rattus norvegicus OX=10116 GN=Atp5f1b PE=1 SV=1	2.86312e+10	2.9516e+10	2.84026e+10	2.77495e+10	3.01424e+10	2.82414e+10	2.74236e+10	2.66374e+10	2.87624e+10	2.96177e+10	3.08572e+10	2.84839e+10	2.94054e+10	2.77186e+10	2.86229e+10
P68370	Tubulin alpha-1A chain OS=Rattus norvegicus OX=10116 GN=Tuba1a PE=1 SV=1	1.97432e+09	2.16907e+09	1.39731e+09	1.21977e+09	1.92876e+09	1.40278e+09	2.42402e+09	1.3763e+09	2.55797e+09	2.90855e+09	2.58159e+09	1.84235e+09	1.53936e+09	1.55164e+09	1.53277e+09
F1M3W5	Dmx-like 2 OS=Rattus norvegicus OX=10116 GN=Dmxl2 PE=1 SV=3	1.34589e+09	1.30663e+09	1.3191e+09	1.26387e+09	1.23736e+09	1.18252e+09	1.33503e+09	1.25369e+09	1.43622e+09	1.32624e+09	1.29028e+09	1.30633e+09	1.36691e+09	1.2197e+09	1.3231e+09
P85108	Tubulin beta-2A chain OS=Rattus norvegicus OX=10116 GN=Tubb2a PE=1 SV=1	2.67739e+09	3.23757e+09	3.42141e+09	3.28761e+09	3.17791e+09	3.15542e+09	3.73991e+09	3.35386e+09	3.18205e+09	3.62149e+09	3.06784e+09	3.12884e+09	2.76754e+09	2.94806e+09	3.59494e+09
A0A0G2K6S9	Myosin-11 OS=Rattus norvegicus OX=10116 GN=Myh11 PE=1 SV=1	7.05507e+07	1.16066e+08	9.466e+07	2.10969e+08	8.69828e+08	9.57285e+08	5.58499e+07	1.4124e+09	5.20745e+08	7.96276e+07	5.52335e+07	8.11821e+07	7.50147e+07	8.31496e+07	7.0365e+07
Q3KRE8	Tubulin beta-2B chain OS=Rattus norvegicus OX=10116 GN=Tubb2b PE=1 SV=1	5.54444e+08	5.33913e+08	5.17642e+08	4.82555e+08	4.13769e+08	4.58302e+08	5.45727e+08	445403072	4.01225e+08	5.50877e+08	5.62308e+08	5.7656e+08	6.8093e+08	5.36032e+08	5.55249e+08
Q9ER34	Aconitate hydratase, mitochondrial OS=Rattus norvegicus OX=10116 GN=Aco2 PE=1 SV=2	1.40586e+10	1.43439e+10	1.4992e+10	1.42443e+10	1.37592e+10	1.30515e+10	1.39395e+10	1.37225e+10	1.49128e+10	1.37712e+10	1.43622e+10	1.45376e+10	1.46526e+10	1.38063e+10	1.48944e+10
P69897	Tubulin beta-5 chain OS=Rattus norvegicus OX=10116 GN=Tubb5 PE=1 SV=1	3.60029e+09	3.62753e+09	3.56743e+09	3.49916e+09	3.36023e+09	3.70382e+09	3.83047e+09	3.57199e+09	3.59618e+09	4.00203e+09	3.91506e+09	3.79478e+09	3.36791e+09	3.64014e+09	3.39564e+09
P82995	Heat shock protein HSP 90-alpha OS=Rattus norvegicus OX=10116 GN=Hsp90aa1 PE=1 SV=3	9.55861e+09	9.53378e+09	9.59222e+09	8.62372e+09	8.62529e+09	8.50653e+09	9.25977e+09	8.64472e+09	8.16719e+09	9.90478e+09	8.64747e+09	9.19688e+09	9.58444e+09	9.3049e+09	9.45572e+09
B4F7C2	Tubulin beta chain OS=Rattus norvegicus OX=10116 GN=Tubb4a PE=1 SV=1	4.41946e+09	4.35328e+09	3.84604e+09	4.98341e+09	5.39325e+09	5.17798e+09	4.45377e+09	3.76456e+09	4.42757e+09	5.38661e+09	5.30489e+09	5.32993e+09	4.35273e+09	4.09382e+09	4.10161e+09
G3V6Y6	Alpha-1,4 glucan phosphorylase OS=Rattus norvegicus OX=10116 GN=Pygb PE=1 SV=2	5.09499e+09	5.51982e+09	4.95678e+09	4.98329e+09	5.0182e+09	4.95436e+09	5.10483e+09	5.00502e+09	4.25573e+09	5.92478e+09	5.48272e+09	5.34801e+09	5.48939e+09	5.00172e+09	5.42033e+09
G3V7C6	Tubulin beta chain OS=Rattus norvegicus OX=10116 GN=Tubb4b PE=1 SV=2	2.0915e+09	2.00339e+09	2.16419e+09	2.17986e+09	1.94868e+09	2.05873e+09	1.95857e+09	1879147520	1.71145e+09	1.83846e+09	1.85652e+09	2.00005e+09	2.14834e+09	1.99121e+09	1.83078e+09
P61765	Syntaxin-binding protein 1 OS=Rattus norvegicus OX=10116 GN=Stxbp1 PE=1 SV=1	1.7055e+10	1.68294e+10	1.70235e+10	1.69818e+10	1.7713e+10	1.64999e+10	1.64933e+10	1.52419e+10	1.83308e+10	1.809e+10	1.7758e+10	1.67813e+10	1.75867e+10	1.55718e+10	1.59585e+10
P02770	Serum albumin OS=Rattus norvegicus OX=10116 GN=Alb PE=1 SV=2	4.62512e+08	2.76782e+08	3.20521e+08	3.39907e+08	3.75394e+08	4.19974e+08	3.80574e+08	410912316	2.82234e+08				3.60972e+08	5.18406e+08	3.11044e+08
A0A0G2JSH5	Serum albumin OS=Rattus norvegicus OX=10116 GN=Alb PE=1 SV=1	9.12619e+06	1.02624e+07	1.15276e+07	1.03649e+07	1.04989e+07	9.75529e+06	9.62131e+06	10139857	9.1204e+06	2.76747e+08	2.37746e+08	2.77158e+08	1.01047e+07	1.07392e+07	1.09132e+07
A0A0G2K4Y7	Unconventional myosin-Va OS=Rattus norvegicus OX=10116 GN=Myo5a PE=1 SV=1	1.92865e+09	1.82723e+09	2.0308e+09	1.81484e+09	1.95687e+09	1.80182e+09	1.98344e+09	1.94775e+09	1.94593e+09	2.06404e+09	1.90868e+09	1.88492e+09	1.91206e+09	1.79868e+09	1.97697e+09
Q5XIF6	Tubulin alpha-4A chain OS=Rattus norvegicus OX=10116 GN=Tuba4a PE=1 SV=1	6.83905e+09	7.20351e+09	7.28247e+09	6.72124e+09	6.9815e+09	6.83433e+09	7.29516e+09	7.19904e+09	7.65468e+09	7.142e+09	6.98964e+09	7.0912e+09	7.30708e+09	6.49434e+09	7.00914e+09
Q6AYZ1	Tubulin alpha-1C chain OS=Rattus norvegicus OX=10116 GN=Tuba1c PE=1 SV=1	1.39903e+06	1.89237e+06	2.15028e+06	5.22188e+06	8.64113e+06	7.15635e+06	2.54668e+06	11220917	4.80834e+06	3.8092e+06	2.5501e+06	3.00445e+06			1.38743e+06
Q3ZB97	AP complex subunit beta OS=Rattus norvegicus OX=10116 GN=Ap2b1 PE=1 SV=1	2.01672e+09	2.09837e+09	2.07124e+09	2.07196e+09	2.16307e+09	1.79547e+09	2.12286e+09	1.86659e+09	2.24542e+09	2.39676e+09	2.06718e+09	2.09893e+09	2.17771e+09	1.98817e+09	2.16455e+09
P34058	Heat shock protein HSP 90-beta OS=Rattus norvegicus OX=10116 GN=Hsp90ab1 PE=1 SV=4	5.9896e+09	6.22965e+09	6.32888e+09	5.89906e+09	5.69475e+09	5.5705e+09	6.07649e+09	5.5709e+09	5.30387e+09	6.49691e+09	5.26567e+09	6.1574e+09	5.98281e+09	6.00129e+09	6.30454e+09
A0A0G2K3K2	Actin, cytoplasmic 1 OS=Rattus norvegicus OX=10116 GN=Actb PE=1 SV=1	3.72387e+10	3.55748e+10	3.68028e+10	3.36447e+10	3.50502e+10	3.51957e+10	4.45878e+10	4.45549e+10	3.64641e+10	3.42059e+10	3.33897e+10	3.30665e+10	3.54639e+10	3.70778e+10	3.43127e+10
P06685	Sodium/potassium-transporting ATPase subunit alpha-1 OS=Rattus norvegicus OX=10116 GN=Atp1a1 PE=1 SV=1	3.14166e+09	3.0529e+09	3.15487e+09	2.82767e+09	2.57564e+09	2.61531e+09	3.24024e+09	3.02033e+09	3.39405e+09	2.91972e+09	2.75523e+09	2.9734e+09	2.92448e+09	2.94004e+09	3.15985e+09
O35303	Dynamin-1-like protein OS=Rattus norvegicus OX=10116 GN=Dnm1l PE=1 SV=1	2.3286e+09	2.33096e+09	2.29844e+09	2.31704e+09	2.39732e+09	2.26559e+09	2.47019e+09	2.21955e+09	2.36023e+09	2.48387e+09	2.43727e+09	2.32132e+09	2.37969e+09	2.12279e+09	2.33153e+09
P50554	4-aminobutyrate aminotransferase, mitochondrial OS=Rattus norvegicus OX=10116 GN=Abat PE=1 SV=3	6.59903e+09	6.87855e+09	6.89254e+09	6.43442e+09	6.47976e+09	6.37658e+09	6.89058e+09	6.53047e+09	6.32568e+09	6.74008e+09	6.89326e+09	6.56685e+09	6.82231e+09	6.37848e+09	6.67164e+09
Q4QRB4	Tubulin beta-3 chain OS=Rattus norvegicus OX=10116 GN=Tubb3 PE=1 SV=1	5.98193e+09	6.16477e+09	5.77217e+09	5.46325e+09	6.03596e+09	5.87247e+09	5.95684e+09	5.42504e+09	6.08585e+09	6.09584e+09	6.13976e+09	5.46675e+09	5.76917e+09	5.70292e+09	5.90116e+09
P18484	AP-2 complex subunit alpha-2 OS=Rattus norvegicus OX=10116 GN=Ap2a2 PE=1 SV=3	1.33481e+08	1.55617e+08	1.62908e+08	1.76445e+08	1.59568e+08	1.28242e+08	1.51505e+08	161291783	1.66032e+08	1.73879e+08	1.62086e+08	1.84298e+08	1.67673e+08	1.70084e+08	1.79664e+08
Q66HM2	AP-2 complex subunit alpha OS=Rattus norvegicus OX=10116 GN=Ap2a2 PE=1 SV=1	3.56199e+07	5.25083e+07	3.43984e+07	5.2344e+07	4.86143e+07	2.26935e+07		50241220	5.77029e+07	5.00683e+07	4.91747e+07	4.63707e+07	4.69322e+07	4.82016e+07	3.24479e+07
F1LRV4	Heat shock 70 kDa protein 4 OS=Rattus norvegicus OX=10116 GN=Hspa4 PE=1 SV=1	2.28391e+09	2.32325e+09	2.31619e+09	2.36584e+09	2.56014e+09	2.36101e+09	2.37659e+09	2.1632e+09	2.20297e+09	2.76847e+09	2.34562e+09	2.594e+09	2.25086e+09	2.08521e+09	2.25344e+09
A0A0G2K0M8	Neural cell adhesion molecule 1 OS=Rattus norvegicus OX=10116 GN=Ncam1 PE=1 SV=1	1.96842e+09	2.02399e+09	2.11032e+09	1.98103e+09	1.92652e+09	1.92504e+09	1.9409e+09	1.83915e+09	1.61813e+09	1.87171e+09	1.87477e+09	1.80298e+09	1.95843e+09	1.87421e+09	2.05715e+09
C7C5T2	ATP-dependent 6-phosphofructokinase OS=Rattus norvegicus OX=10116 GN=Pfkp PE=2 SV=1	2.06063e+09	2.1776e+09	2.16521e+09	2.01805e+09	2.13766e+09	2.10946e+09	2.2485e+09	2.05278e+09	2.32704e+09	2.32767e+09	2.26827e+09	2.17444e+09	2.09369e+09	2.19091e+09	1.99201e+09
P11980	Pyruvate kinase PKM OS=Rattus norvegicus OX=10116 GN=Pkm PE=1 SV=3	3.06767e+09	2.99932e+09	2.63537e+09	2.67794e+09	2.68129e+09	2.77288e+09	2.94705e+09	2.68271e+09	2.90542e+09	3.03807e+09	2.83441e+09	3.06907e+09	2.72827e+09	2.93179e+09	2.882e+09
Q63198	Contactin-1 OS=Rattus norvegicus OX=10116 GN=Cntn1 PE=1 SV=2	4.03122e+09	4.02158e+09	4.02415e+09	3.85474e+09	3.98224e+09	3.67607e+09	4.03583e+09	3.79698e+09	4.11132e+09	3.42132e+09	3.70605e+09	3.56679e+09	4.11397e+09	3.83601e+09	4.04343e+09
Q5XI78	2-oxoglutarate dehydrogenase, mitochondrial OS=Rattus norvegicus OX=10116 GN=Ogdh PE=1 SV=1	1.76755e+09	1.7537e+09	1.80738e+09	1.75307e+09	1.88648e+09	1.81765e+09	1.72018e+09	1701036235	1.91742e+09	1.86426e+09	1.98634e+09	1.91409e+09	1.73151e+09	1.68808e+09	1.70057e+09
P97536	Cullin-associated NEDD8-dissociated protein 1 OS=Rattus norvegicus OX=10116 GN=Cand1 PE=1 SV=1	2.87967e+09	2.99007e+09	3.07705e+09	2.8703e+09	2.78324e+09	2.72929e+09	2.90357e+09	2.71552e+09	2.74165e+09	3.13356e+09	2.96159e+09	2.8704e+09	2.98725e+09	2.86223e+09	3.04436e+09
G3V6P7	Myosin, heavy polypeptide 9, non-muscle OS=Rattus norvegicus OX=10116 GN=Myh9 PE=1 SV=1	3.7624e+08	3.8695e+08	3.74528e+08	4.37681e+08	4.64203e+08	4.96549e+08	3.43542e+08	4.99133e+08	5.44077e+08	4.0125e+08	3.23394e+08	3.63675e+08	3.7538e+08	3.65652e+08	3.59556e+08
A0A0G2KBC7	ATP-dependent 6-phosphofructokinase OS=Rattus norvegicus OX=10116 GN=Pfkm PE=1 SV=1	4.08451e+09	4.26821e+09	4.15821e+09	4.04403e+09	4.16342e+09	3.98928e+09	4.15528e+09	3.86406e+09	3.90279e+09	4.41283e+09	4.31499e+09	4.28017e+09	4.06969e+09	4.12806e+09	4.25935e+09
A0A0G2K9T4	Microtubule-actin cross-linking factor 1 OS=Rattus norvegicus OX=10116 GN=Macf1 PE=1 SV=1	5.165e+08	5.58254e+08	5.31865e+08	4.8071e+08	5.27091e+08	5.1782e+08	5.155e+08	5.80129e+08	5.39008e+08	4.96081e+08	5.54477e+08	5.04015e+08	4.92932e+08	5.07032e+08	6.07161e+08
P12839	Neurofilament medium polypeptide OS=Rattus norvegicus OX=10116 GN=Nefm PE=1 SV=4	3.24185e+09	3.42414e+09	3.32828e+09	4.33301e+09	3.78779e+09	4.64456e+09	3.61089e+09	3.79414e+09	3.86534e+09	2.01531e+09	3.15564e+09	4.39031e+09	3.56611e+09	3.89456e+09	3.33047e+09
D4A8U7	Dynactin 1, isoform CRA_a OS=Rattus norvegicus OX=10116 GN=Dctn1 PE=1 SV=2	1.25831e+09	1.22961e+09	1.34425e+09	1.306e+09	1.2547e+09	1.31145e+09	1.25984e+09	1.19197e+09	1.30232e+09	1.37338e+09	1.26897e+09	1.35133e+09	1.28022e+09	1.21817e+09	1.18375e+09
P46462	Transitional endoplasmic reticulum ATPase OS=Rattus norvegicus OX=10116 GN=Vcp PE=1 SV=3	3.07046e+09	3.18531e+09	3.107e+09	3.00153e+09	3.00772e+09	3.15142e+09	3.10018e+09	2.96311e+09	2.88572e+09	3.54281e+09	3.28371e+09	3.11859e+09	2.90788e+09	2.93264e+09	2.92793e+09
Q9JMB3	Erythrocyte membrane protein band 4.1-like 3 OS=Rattus norvegicus OX=10116 GN=Epb41l3 PE=1 SV=1	6.26231e+07	5.80657e+07	6.89122e+07	6.6016e+07	1.78934e+07	5.91216e+07	1.64863e+07	58769920	5.66926e+07	5.43098e+07	6.1976e+07	2.05849e+07	6.4435e+07	6.12005e+07	6.2921e+07
P07335	Creatine kinase B-type OS=Rattus norvegicus OX=10116 GN=Ckb PE=1 SV=2	1.59945e+10	1.72098e+10	1.54039e+10	1.43047e+10	1.59597e+10	1.58347e+10	1.64254e+10	1.56708e+10	1.77509e+10	1.60315e+10	1.67695e+10	1.60354e+10	1.58911e+10	1.65389e+10	1.60685e+10
A0A0G2K6U1	Vesicle-fusing ATPase OS=Rattus norvegicus OX=10116 GN=Nsf PE=1 SV=1	1.01329e+10	1.01438e+10	1.08375e+10	1.09098e+10	9.88073e+09	9.65991e+09	9.99003e+09	9.81904e+09	1.16446e+10	1.05477e+10	1.02305e+10	9.82738e+09	1.09719e+10	1.02317e+10	1.0641e+10
P63039	60 kDa heat shock protein, mitochondrial OS=Rattus norvegicus OX=10116 GN=Hspd1 PE=1 SV=1	6.68598e+09	6.98194e+09	7.04792e+09	6.58318e+09	7.05614e+09	6.73547e+09	6.89378e+09	6.4024e+09	6.80497e+09	7.2863e+09	7.04837e+09	6.66514e+09	6.87368e+09	6.82194e+09	6.98539e+09
A0A0G2JVG3	Pyruvate kinase OS=Rattus norvegicus OX=10116 GN=Pkm PE=1 SV=1	3.18829e+08	3.66125e+08	2.89024e+08	2.97162e+08	2.07066e+08	2.96899e+08	3.92189e+08	322112812	2.96601e+08	3.58111e+08	3.25634e+08	3.54532e+08	3.17707e+08	3.25415e+08	3.34632e+08
G3V874	Erythrocyte membrane protein band 4.1-like 3 OS=Rattus norvegicus OX=10116 GN=Epb41l3 PE=1 SV=1	2.26568e+07	2.44933e+07	3.00846e+07	2.58398e+07	2.45654e+07	2.71661e+07	2.1043e+07	2.7164e+07	2.45686e+07	2.04339e+07	2.23408e+07	3.11574e+07	3.10984e+07	3.33549e+07	2.66828e+07
P09951	Synapsin-1 OS=Rattus norvegicus OX=10116 GN=Syn1 PE=1 SV=3	1.11433e+09	1.15396e+09	1.02618e+09	1.20899e+09	1.32959e+09	1.15528e+09	1.09931e+09	1.02847e+09	9.82733e+09	1.05872e+09	1.2967e+09	1.31889e+09	1.3112e+09	9.96654e+08	1.15343e+09
Q62717	Calcium-dependent secretion activator 1 OS=Rattus norvegicus OX=10116 GN=Cadps PE=1 SV=1	2.01632e+08	2.18666e+08	2.05814e+08	1.83119e+08	1.97485e+08	1.53856e+08	1.75969e+08	1.68392e+08	2.0538e+08	2.01697e+08	1.89061e+08	2.03855e+08	2.03017e+08	1.98172e+08	2.03921e+08
A0A0G2K5U9	Alpha-actinin-4 OS=Rattus norvegicus OX=10116 GN=Actn4 PE=1 SV=1	3.29511e+07	3.16714e+07	3.29764e+07	2.90731e+07	2.43574e+07	2.64378e+07	2.91836e+07	2.7834e+07	3.29366e+07	3.09822e+07	2.7685e+07	2.72774e+07	2.74719e+07	3.19896e+07	2.91708e+07
Q9QXQ0	Alpha-actinin-4 OS=Rattus norvegicus OX=10116 GN=Actn4 PE=1 SV=2
A0A0H2UHB7	Anion exchange protein OS=Rattus norvegicus OX=10116 GN=Slc4a4 PE=1 SV=1	2.4741e+08	2.57905e+08	2.26919e+08	1.96332e+08	2.113e+08	1.93061e+08	2.29798e+08	223467624	1.94677e+08	2.47747e+08	2.85867e+08	2.11529e+08	2.4657e+08	2.25064e+08	2.20988e+08
D4A133	ATPase H+-transporting V1 subunit A OS=Rattus norvegicus OX=10116 GN=Atp6v1a PE=1 SV=1	9.66178e+09	9.65396e+09	1.0252e+10	9.51353e+09	9.87188e+09	9.38655e+09	9.42054e+09	9.05e+09	1.00631e+10	1.0332e+10	1.03665e+10	9.90747e+09	9.96523e+09	9.31375e+09	9.94126e+09
P05708	Hexokinase-1 OS=Rattus norvegicus OX=10116 GN=Hk1 PE=1 SV=4	3.1878e+09	3.30704e+09	3.32633e+09	3.09816e+09	2.95552e+09	2.909e+09	3.32229e+09	3152871438	3.18681e+09	3.30433e+09	3.30603e+09	3.1872e+09	3.19745e+09	3.15807e+09	3.27048e+09
P50398	Rab GDP dissociation inhibitor alpha OS=Rattus norvegicus OX=10116 GN=Gdi1 PE=1 SV=1	7.84528e+09	7.98104e+09	7.97403e+09	7.48566e+09	7.60095e+09	7.00326e+09	7.91505e+09	7.28489e+09	7.14724e+09	8.50787e+09	8.23462e+09	8.22441e+09	7.69088e+09	7.46564e+09	7.63724e+09
Q3T1H3	Ncam1 protein OS=Rattus norvegicus OX=10116 GN=Ncam1 PE=2 SV=1	1.63715e+09	1.59458e+09	1.72684e+09	1.66563e+09	1.5779e+09	1.6562e+09	1.65688e+09	1.55265e+09	1.38221e+09	1.60854e+09	1.4807e+09	1.51604e+09	1.70967e+09	1.56771e+09	1.67367e+09
Q5U300	Ubiquitin-like modifier-activating enzyme 1 OS=Rattus norvegicus OX=10116 GN=Uba1 PE=1 SV=1	2.48606e+09	2.63368e+09	2.6465e+09	2.50752e+09	2.47955e+09	2.62352e+09	2.52609e+09	2.52369e+09	2.53638e+09	2.69093e+09	2.57992e+09	2.59693e+09	2.64461e+09	2.57528e+09	2.67305e+09
G3V733	Synapsin II, isoform CRA_a OS=Rattus norvegicus OX=10116 GN=Syn2 PE=1 SV=3	5.41569e+09	5.40099e+09	5.3062e+09	5.04689e+09	5.41617e+09	5.39664e+09	5.19418e+09	4.91872e+09	6.78745e+09	5.51167e+09	5.27446e+09	4.53522e+09	5.34403e+09	5.00649e+09	5.20426e+09
P50399	Rab GDP dissociation inhibitor beta OS=Rattus norvegicus OX=10116 GN=Gdi2 PE=1 SV=2	2.61745e+09	2.82203e+09	2.76462e+09	2.61354e+09	2.67183e+09	2.46372e+09	2.70337e+09	2.65201e+09	2.52085e+09	2.85294e+09	2.70091e+09	2.56734e+09	2.6716e+09	2.77409e+09	2.81468e+09
Q62950	Dihydropyrimidinase-related protein 1 OS=Rattus norvegicus OX=10116 GN=Crmp1 PE=1 SV=1	2.96322e+09	2.99012e+09	2.83315e+09	2.76565e+09	2.91731e+09	2.68822e+09	3.1448e+09	2.7626e+09	3.43692e+09	3.23878e+09	3.17198e+09	2.86599e+09	2.82162e+09	2.64176e+09	2.86282e+09
Q6T487	Alpha-actinin-1 OS=Rattus norvegicus OX=10116 GN=Actn1 PE=1 SV=1	4.63718e+08	4.54093e+08	4.11223e+08	4.36315e+08	6.08962e+08	5.94888e+08	4.53916e+08	757621962	8.61429e+08	4.46962e+08	3.44951e+08	3.35841e+08	4.04801e+08	4.59772e+08	4.33158e+08
F1LQN3	Reticulon OS=Rattus norvegicus OX=10116 GN=Rtn4 PE=1 SV=1	4.07308e+09	4.35866e+09	4.47457e+09	4.4135e+09	4.41351e+09	3.89896e+09	4.18482e+09	4.40986e+09	3.98449e+09	4.80266e+09	4.7303e+09	4.47153e+09	4.45714e+09	4.48404e+09	4.39586e+09
A0A0G2K2C7	Ubiquitin-specific peptidase 9, X-linked OS=Rattus norvegicus OX=10116 GN=Usp9x PE=1 SV=1	7.94107e+08	6.66184e+08	7.6012e+08	6.96958e+08	7.13758e+08	7.1094e+08	7.06099e+08	587972312	5.74418e+08	8.69158e+08	7.08047e+08	8.85085e+08	8.07393e+08	7.2365e+08	7.29659e+08
P21575	Dynamin-1 OS=Rattus norvegicus OX=10116 GN=Dnm1 PE=1 SV=2	5.72083e+08	6.1517e+08	5.81142e+08	6.54349e+08	8.74245e+08	7.04838e+08	4.92663e+08	6.21572e+08	5.58357e+09	5.52202e+08	7.65281e+08	8.0558e+08	6.4839e+08	4.88117e+08	5.2559e+08
B1WBU9	Alpha-1,4 glucan phosphorylase OS=Rattus norvegicus OX=10116 GN=Pygm PE=2 SV=1	1.06605e+09	1.08187e+09	1.14813e+09	1.0001e+09	9.94655e+08	1.0453e+09	1.08146e+09	1.13827e+09	9.29983e+08	9.54685e+08	1.19486e+09	1.19623e+09	1.14658e+09	1.02346e+09	1.02723e+09
G3V9N8	AP complex subunit beta OS=Rattus norvegicus OX=10116 GN=Ap1b1 PE=1 SV=3	8.09027e+08	8.69146e+08	8.64062e+08	8.06715e+08	8.51459e+08	7.8464e+08	8.60674e+08	7.62451e+08	8.33279e+08	8.99998e+08	8.24262e+08	8.45854e+08	8.75973e+08	7.79578e+08	8.67481e+08
P62815	V-type proton ATPase subunit B, brain isoform OS=Rattus norvegicus OX=10116 GN=Atp6v1b2 PE=1 SV=1	3.83858e+09	3.94023e+09	3.76141e+09	3.58932e+09	4.0292e+09	3.70895e+09	3.91534e+09	3.60933e+09	4.21465e+09	4.27324e+09	4.32612e+09	3.79139e+09	4.03663e+09	3.51426e+09	3.77632e+09
P63018	Heat shock cognate 71 kDa protein OS=Rattus norvegicus OX=10116 GN=Hspa8 PE=1 SV=1	1.4888e+10	1.47442e+10	1.55946e+10	1.48309e+10	1.48984e+10	1.50133e+10	1.41905e+10	1.45306e+10	1.45469e+10	1.54694e+10	1.45101e+10	1.46967e+10	1.48773e+10	1.51052e+10	1.51943e+10
P13233	2',3'-cyclic-nucleotide 3'-phosphodiesterase OS=Rattus norvegicus OX=10116 GN=Cnp PE=1 SV=2	1.42293e+10	1.41192e+10	1.3463e+10	1.71396e+10	1.5226e+10	1.71433e+10	1.58097e+10	1.59187e+10	1.51844e+10	1.20264e+10	1.66736e+10	2.11249e+10	1.4407e+10	1.5391e+10	1.36268e+10
P07323	Gamma-enolase OS=Rattus norvegicus OX=10116 GN=Eno2 PE=1 SV=2	1.02667e+10	1.09479e+10	1.10374e+10	1.06662e+10	1.0545e+10	1.05029e+10	1.05458e+10	9.7226e+09	1.10317e+10	1.07399e+10	1.10268e+10	1.02485e+10	1.08087e+10	1.06236e+10	1.04464e+10
A0A0G2K0F3	Band 4.1-like protein 1-like OS=Rattus norvegicus OX=10116 GN=Epb41l1 PE=1 SV=1	1.93384e+09	1.91378e+09	1.93009e+09	1.90062e+09	1.85041e+09	1.74733e+09	1.89082e+09	1.77546e+09	1.89473e+09	1.93253e+09	1.91608e+09	1.74578e+09	1.89908e+09	1.81964e+09	1.87272e+09
Q5RKI0	WD repeat-containing protein 1 OS=Rattus norvegicus OX=10116 GN=Wdr1 PE=1 SV=3	2.5827e+09	2.59518e+09	2.65017e+09	2.70552e+09	2.5788e+09	2.57859e+09	2.51603e+09	2.50505e+09	2.34748e+09	2.76118e+09	2.62461e+09	2.51148e+09	2.71292e+09	2.59012e+09	2.53054e+09
P50137	Transketolase OS=Rattus norvegicus OX=10116 GN=Tkt PE=1 SV=1	4.01976e+09	3.92823e+09	4.36546e+09	4.21358e+09	3.76561e+09	4.30379e+09	3.83215e+09	3.8875e+09	3.56174e+09	3.81842e+09	3.54667e+09	4.26604e+09	3.95649e+09	4.23086e+09	4.27287e+09
A0A096MJE6	Tenascin R, isoform CRA_b OS=Rattus norvegicus OX=10116 GN=Tnr PE=1 SV=1	2.11011e+09	2.23496e+09	2.23698e+09	1.97186e+09	2.32219e+09	2.16481e+09	2.07314e+09	2.02152e+09	2.19134e+09	1.94636e+09	2.147e+09	2.28434e+09	2.19353e+09	2.20986e+09	2.20453e+09
P15999	ATP synthase subunit alpha, mitochondrial OS=Rattus norvegicus OX=10116 GN=Atp5f1a PE=1 SV=2	2.49737e+10	2.54551e+10	2.51739e+10	2.42797e+10	2.54801e+10	2.64674e+10	2.50806e+10	2.42206e+10	2.61854e+10	2.59445e+10	2.71632e+10	2.56271e+10	2.61252e+10	2.43005e+10	2.57324e+10
A0A0G2K1T0	Glutaminase kidney isoform, mitochondrial OS=Rattus norvegicus OX=10116 GN=Gls PE=1 SV=1	7.24561e+07	8.40996e+07	1.13229e+08	9.01845e+07	8.47077e+07	7.9442e+07	9.80757e+07	97617984	1.0032e+08				9.45533e+07	9.90703e+07	1.09867e+08
Q66HA8	Heat shock protein 105 kDa OS=Rattus norvegicus OX=10116 GN=Hsph1 PE=1 SV=1	1.64812e+09	1.62073e+09	1.7341e+09	1.50501e+09	1.48225e+09	1.62871e+09	1.58924e+09	1.45771e+09	1.55903e+09	1.83646e+09	1.66138e+09	1.63661e+09	1.67563e+09	1.52762e+09	1.69866e+09
F1LLX6	Calcium-dependent secretion activator 1 OS=Rattus norvegicus OX=10116 GN=Cadps PE=1 SV=3	2.27735e+07	2.31967e+07	2.38581e+07	2.19213e+07	2.05695e+07	2.2254e+07	2.20894e+07	22212222	2.31806e+07	2.38036e+07	2.35881e+07	2.42732e+07	2.11187e+07	2.15169e+07	2.58434e+07
P13264	Glutaminase kidney isoform, mitochondrial OS=Rattus norvegicus OX=10116 GN=Gls PE=1 SV=2										3.47379e+07	5.05849e+07	3.63412e+07
P11506	Plasma membrane calcium-transporting ATPase 2 OS=Rattus norvegicus OX=10116 GN=Atp2b2 PE=1 SV=2	2.45561e+07	1.24019e+07	2.51779e+07	1.74606e+07	2.14857e+07	1.772e+07	1.33886e+07	23385837	4.37163e+07	9.19694e+06	2.09433e+07	2.99348e+07	2.22537e+07	2.29446e+07	3.13592e+07
P05197	Elongation factor 2 OS=Rattus norvegicus OX=10116 GN=Eef2 PE=1 SV=4	2.18738e+09	2.24457e+09	2.32454e+09	2.24439e+09	2.21676e+09	2.2557e+09	2.14064e+09	2.1011e+09	1.9879e+09	2.32052e+09	2.17363e+09	2.25148e+09	2.20937e+09	2.07011e+09	2.13935e+09
P04797	Glyceraldehyde-3-phosphate dehydrogenase OS=Rattus norvegicus OX=10116 GN=Gapdh PE=1 SV=3	6.41969e+07	6.25767e+07	6.9804e+07	4.1031e+07	6.11601e+07	2.98357e+08	7.44496e+07	79280613	8.96239e+07	4.18655e+07	1.05123e+08	7.38197e+07	6.09005e+07	7.8313e+07	5.50015e+07
F1LX07	Solute carrier family 25 member 12 OS=Rattus norvegicus OX=10116 GN=Slc25a12 PE=1 SV=3	3.50615e+09	3.56901e+09	3.42003e+09	3.3507e+09	3.53051e+09	3.1752e+09	3.42529e+09	3.30718e+09	3.47068e+09	3.75478e+09	3.59064e+09	3.49575e+09	3.57402e+09	3.32136e+09	3.54715e+09
P05065	Fructose-bisphosphate aldolase A OS=Rattus norvegicus OX=10116 GN=Aldoa PE=1 SV=2	1.28929e+10	1.26624e+10	1.30565e+10	1.30302e+10	1.3706e+10	1.3769e+10	1.16905e+10	1.21333e+10	1.26038e+10	1.35218e+10	1.39723e+10	1.31473e+10	1.34627e+10	1.2403e+10	1.24011e+10
D3ZA84	Talin 2 OS=Rattus norvegicus OX=10116 GN=Tln2 PE=1 SV=3	4.5752e+08	3.61692e+08	3.90205e+08	4.26554e+08	3.88666e+08	4.48786e+08	3.56848e+08	4.47951e+08	3.9656e+08	3.81854e+08	3.48986e+08	3.64443e+08	4.24431e+08	4.14439e+08	3.41236e+08
Q62952	Dihydropyrimidinase-related protein 3 OS=Rattus norvegicus OX=10116 GN=Dpysl3 PE=1 SV=2	2.04715e+09	2.0624e+09	1.88843e+09	1.92976e+09	2.02342e+09	1.95853e+09	1.98051e+09	2069772810	1.82935e+09	1.99894e+09	2.18939e+09	2.26513e+09	2.06855e+09	1.9195e+09	1.94597e+09
P97685	Neurofascin OS=Rattus norvegicus OX=10116 GN=Nfasc PE=1 SV=2	5.60225e+07	6.18358e+07	6.81231e+07	5.9741e+07	6.14395e+07	5.89987e+07	6.71452e+07	5.7132e+07	7.49152e+07	6.89112e+07	5.94053e+07	6.56441e+07	6.40549e+07	6.51135e+07	7.11213e+07
F1LNT0	Dihydropyrimidinase-related protein 4 OS=Rattus norvegicus OX=10116 GN=Dpysl4 PE=4 SV=1	1.44492e+09	1.4614e+09	1.34967e+09	1.4989e+09	1.51828e+09	1.39619e+09	1.4424e+09	1.33782e+09	1.71923e+09	1.43103e+09	1.52879e+09	1.51054e+09	1.45065e+09	1.42587e+09	1.41563e+09
P62738	Actin, aortic smooth muscle OS=Rattus norvegicus OX=10116 GN=Acta2 PE=2 SV=1	7.90502e+09	9.04886e+09	8.77731e+09	9.00477e+09	1.07165e+10	1.07427e+10	8.40068e+09	12646361505	1.01978e+10	8.50892e+09	8.27393e+09	8.6099e+09	7.82025e+09	8.46963e+09	8.25499e+09
P33124	Long-chain-fatty-acid--CoA ligase 6 OS=Rattus norvegicus OX=10116 GN=Acsl6 PE=1 SV=1	7.44104e+07	7.88197e+07	7.38701e+07	5.96192e+07	5.53922e+07	5.80988e+07	7.85246e+07	7.84363e+07	6.65168e+07	5.10864e+07	4.30941e+07	5.57053e+07	4.88206e+07	4.88265e+07	5.74116e+07
D3ZUY8	AP-2 complex subunit alpha OS=Rattus norvegicus OX=10116 GN=Ap2a1 PE=1 SV=1	2.75599e+09	2.96757e+09	3.0819e+09	2.9877e+09	2.91757e+09	2.79313e+09	2.81592e+09	2.69221e+09	2.91545e+09	2.84029e+09	2.90533e+09	2.98939e+09	2.95903e+09	2.73106e+09	3.07631e+09
F7F2F3	Heat shock 70 kDa protein 4L OS=Rattus norvegicus OX=10116 GN=Hspa4l PE=1 SV=1	1.178e+09	1.23155e+09	1.29169e+09	1.18235e+09	1.21661e+09	1.22598e+09	1.17605e+09	1.18232e+09	1.13899e+09	1.19725e+09	1.21407e+09	1.185e+09	1.24711e+09	1.2152e+09	1.24251e+09
Q5QD51	A-kinase anchor protein 12 OS=Rattus norvegicus OX=10116 GN=Akap12 PE=1 SV=1	4.06377e+08	4.1123e+08	3.875e+08	4.68563e+08	4.29589e+08	3.93056e+08	4.127e+08	4.44119e+08	3.16099e+08	4.14529e+08	3.62942e+08	4.30074e+08	3.9922e+08	4.38409e+08	3.81589e+08
A0A0G2JX67	Prolyl endopeptidase-like OS=Rattus norvegicus OX=10116 GN=Prepl PE=1 SV=1	1.08379e+09	1.11162e+09	1.09315e+09	1.02809e+09	1.08388e+09	1.08208e+09	1.08227e+09	9.71716e+08	7.58379e+08	1.40516e+09	1.25774e+09	1.08705e+09	1.03403e+09	9.24949e+08	1.1183e+09
D4A8B3	Calcium-transporting ATPase OS=Rattus norvegicus OX=10116 GN=Atp2b2 PE=1 SV=3	2.1876e+07	2.0313e+07	2.00932e+07	2.14014e+07	2.18134e+07	1.08148e+07	1.69672e+07	20069956	2.44311e+07	1.97367e+07	2.432e+07	1.79208e+07	2.34363e+07	1.99067e+07	2.16272e+07
Q9JHU0	Dihydropyrimidinase-related protein 5 OS=Rattus norvegicus OX=10116 GN=Dpysl5 PE=1 SV=1	2.93971e+09	2.98562e+09	2.95541e+09	2.93037e+09	3.09386e+09	3.16592e+09	2.90123e+09	2.79958e+09	3.09039e+09	2.98012e+09	3.13731e+09	3.00227e+09	3.00138e+09	2.99909e+09	2.9969e+09
P10860	Glutamate dehydrogenase 1, mitochondrial OS=Rattus norvegicus OX=10116 GN=Glud1 PE=1 SV=2	1.28859e+10	1.33918e+10	1.32483e+10	1.25024e+10	1.28688e+10	1.32087e+10	1.29535e+10	1.28355e+10	1.10909e+10	1.52736e+10	1.40702e+10	1.42737e+10	1.34267e+10	1.25597e+10	1.35153e+10
Q9JI66	Electrogenic sodium bicarbonate cotransporter 1 OS=Rattus norvegicus OX=10116 GN=Slc4a4 PE=1 SV=1	9.73727e+07	9.8787e+07	1.2145e+08	9.57406e+07	9.83079e+07	6.27226e+07	8.63909e+07	104604128	7.23772e+07	9.73203e+07	9.21811e+07	1.10148e+08	1.0488e+08	1.12796e+08	1.14639e+08
Q5XI34	Protein phosphatase 2 (Formerly 2A), regulatory subunit A (PR 65), alpha isoform, isoform CRA_a OS=Rattus norvegicus OX=10116 GN=Ppp2r1a PE=1 SV=1	3.58755e+09	3.75121e+09	2.98953e+09	3.77103e+09	2.77407e+09	2.58626e+09	3.93739e+09	2.79411e+09	3.98919e+09	4.32434e+09	3.86542e+09	3.95287e+09	4.57312e+09	2.87751e+09	4.08614e+09
Q66HF1	NADH-ubiquinone oxidoreductase 75 kDa subunit, mitochondrial OS=Rattus norvegicus OX=10116 GN=Ndufs1 PE=1 SV=1	4.19602e+09	4.31727e+09	4.49183e+09	4.3293e+09	4.32872e+09	4.20167e+09	4.26414e+09	4.09166e+09	4.4011e+09	4.26573e+09	4.41852e+09	4.42501e+09	4.43738e+09	4.13427e+09	4.45307e+09
C0JPT7	Filamin A OS=Rattus norvegicus OX=10116 GN=Flna PE=1 SV=1	1.11062e+08	8.09565e+07	1.41283e+08	1.96861e+08	5.9013e+08	5.98437e+08	8.80774e+07	9.88878e+08	3.73445e+08	7.89469e+07	4.80921e+07	4.94499e+07	1.11317e+08	1.09186e+08	8.74304e+07
A0A0G2K3Q6	Fructose-bisphosphate aldolase OS=Rattus norvegicus OX=10116 GN=Aldoc PE=1 SV=1	5.82862e+09	6.15407e+09	5.95706e+09	6.2628e+09	5.94409e+09	6.43182e+09	5.64744e+09	5.94963e+09	5.24476e+09	5.97894e+09	6.28463e+09	6.62291e+09	6.18187e+09	6.23138e+09	6.02994e+09
F1M9V7	Aminopeptidase OS=Rattus norvegicus OX=10116 GN=Npepps PE=1 SV=1	2.1961e+09	2.14381e+09	2.26537e+09	2.09081e+09	2.12195e+09	2.0862e+09	2.22935e+09	2.08068e+09	2.12387e+09	2.35833e+09	2.1282e+09	2.15036e+09	2.21255e+09	2.13505e+09	2.17196e+09
P00507	Aspartate aminotransferase, mitochondrial OS=Rattus norvegicus OX=10116 GN=Got2 PE=1 SV=2	1.07775e+10	1.10329e+10	1.13706e+10	1.09689e+10	1.07611e+10	1.10696e+10	1.08222e+10	1.05589e+10	1.15021e+10	9.98846e+09	1.08506e+10	1.06875e+10	1.18785e+10	1.05572e+10	1.102e+10
A0A0A6YYM0	Long-chain-fatty-acid--CoA ligase 6 OS=Rattus norvegicus OX=10116 GN=Acsl6 PE=1 SV=2
M0RAQ6	Hexokinase-1 OS=Rattus norvegicus OX=10116 GN=Hk1 PE=1 SV=2	6.00147e+08	5.32474e+08	6.33454e+08	6.06169e+08	4.97005e+08	5.31875e+08	6.38702e+08	540996096	5.56864e+08	6.34883e+08	5.91339e+08	5.53726e+08	5.88822e+08	6.12533e+08	7.09131e+08
D3ZNW5	Neurofascin OS=Rattus norvegicus OX=10116 GN=Nfasc PE=1 SV=3	8.78534e+06	1.0602e+07	7.13172e+06	1.06482e+07	1.02224e+07	1.11865e+07	9.331e+06	10148976	8.98289e+06	6.62708e+06	7.91701e+06	4.49512e+07	3.80266e+07	1.01326e+07	1.26567e+07
Q68FQ0	T-complex protein 1 subunit epsilon OS=Rattus norvegicus OX=10116 GN=Cct5 PE=1 SV=1	1.65841e+09	1.91523e+09	1.89427e+09	1.84239e+09	1.84031e+09	1.80373e+09	1.72721e+09	1.63675e+09	1.5436e+09	1.83749e+09	1.749e+09	1.88946e+09	1.92864e+09	1.64505e+09	1.7137e+09
G3V928	LDL receptor-related protein 1 OS=Rattus norvegicus OX=10116 GN=Lrp1 PE=1 SV=1	6.60845e+08	6.22621e+08	6.91019e+08	6.24308e+08	6.66216e+08	6.78348e+08	5.86876e+08	7.04213e+08	5.44094e+08	7.61916e+08	7.21716e+08	6.31968e+08	1.02477e+09	6.12737e+08	7.47353e+08
P50475	Alanine--tRNA ligase, cytoplasmic OS=Rattus norvegicus OX=10116 GN=Aars PE=1 SV=3	1.00796e+09	9.98956e+08	1.01316e+09	1.01903e+09	1.00659e+09	1.03293e+09	9.27975e+08	9.73832e+08	8.99343e+08	1.10634e+09	1.06069e+09	1.01379e+09	1.00366e+09	9.68873e+08	1.01029e+09
P11505	Plasma membrane calcium-transporting ATPase 1 OS=Rattus norvegicus OX=10116 GN=Atp2b1 PE=1 SV=2	5.2259e+08	5.71914e+08	5.96614e+08	5.70672e+08	5.37674e+08	5.04591e+08	5.71523e+08	5.18579e+08	8.73711e+08	5.86818e+08	5.57468e+08	5.72874e+08	5.67216e+08	5.55187e+08	5.65672e+08
Q2I6B5	V-type proton ATPase subunit a OS=Rattus norvegicus OX=10116 GN=Atp6v0a1 PE=1 SV=1	3.88517e+09	3.91181e+09	4.05775e+09	3.68575e+09	3.76599e+09	3.70917e+09	3.68553e+09	3.53615e+09	4.16929e+09	4.15422e+09	4.02094e+09	3.65404e+09	4.02473e+09	3.71753e+09	3.98839e+09
P16617	Phosphoglycerate kinase 1 OS=Rattus norvegicus OX=10116 GN=Pgk1 PE=1 SV=2	8.06091e+09	8.72457e+09	8.58195e+09	8.47807e+09	8.16899e+09	8.65015e+09	8.2763e+09	8467042110	8.33038e+09	8.29221e+09	8.38137e+09	8.60644e+09	8.51748e+09	8.66614e+09	8.56004e+09
O35095	Neurochondrin OS=Rattus norvegicus OX=10116 GN=Ncdn PE=1 SV=2	2.15934e+09	2.18917e+09	2.23305e+09	2.13747e+09	2.45068e+09	2.25034e+09	2.17428e+09	2.06124e+09	2.4178e+09	2.56359e+09	2.46455e+09	2.40921e+09	2.28178e+09	2.16296e+09	2.20596e+09
Q9ERH3	WD repeat-containing protein 7 OS=Rattus norvegicus OX=10116 GN=Wdr7 PE=1 SV=1	7.98444e+08	7.77854e+08	7.92523e+08	8.08583e+08	7.79752e+08	6.78404e+08	7.8632e+08	7.72442e+08	8.82035e+08	8.38133e+08	8.0162e+08	7.26341e+08	8.26104e+08	7.75799e+08	7.77056e+08
P23565	Alpha-internexin OS=Rattus norvegicus OX=10116 GN=Ina PE=1 SV=2	5.25004e+08	4.98961e+08	6.37163e+08	6.35044e+08	5.80623e+08	5.59455e+08	4.89056e+08	5.68064e+08	5.60984e+08	4.15175e+08	5.56659e+08	6.46799e+08	5.63517e+08	5.91086e+08	6.29345e+08
Q63560	Microtubule-associated protein 6 OS=Rattus norvegicus OX=10116 GN=Map6 PE=1 SV=1	1.96998e+09	2.18442e+09	2.11723e+09	2.23882e+09	1.93816e+09	1.51894e+09	1.77419e+09	1.99266e+09	6.85393e+09	1.94703e+09	1.82788e+09	2.13597e+09	2.32156e+09	1.80288e+09	2.05597e+09
D3ZQD3	Oxoglutarate dehydrogenase-like OS=Rattus norvegicus OX=10116 GN=Ogdhl PE=1 SV=2	7.46597e+08	7.9551e+08	8.02417e+08	7.53204e+08	7.6145e+08	6.90281e+08	8.18883e+08	7.27259e+08	8.05774e+08	7.27627e+08	8.48202e+08	8.26812e+08	8.65326e+08	7.5621e+08	7.75608e+08
P30835	ATP-dependent 6-phosphofructokinase, liver type OS=Rattus norvegicus OX=10116 GN=Pfkl PE=1 SV=3	9.55204e+08	1.03337e+09	9.93794e+08	1.02498e+09	9.1815e+08	9.02686e+08	9.05933e+08	8.78843e+08	8.72912e+08	1.05938e+09	8.77771e+08	8.97879e+08	9.56409e+08	9.70384e+08	9.18148e+08
P28480	T-complex protein 1 subunit alpha OS=Rattus norvegicus OX=10116 GN=Tcp1 PE=1 SV=1	1.67925e+09	1.72565e+09	1.62615e+09	1.79835e+09	1.884e+09	1.95896e+09	1.77789e+09	1.55556e+09	1.56608e+09	2.29434e+09	1.99544e+09	1.95733e+09	1.73577e+09	1.58603e+09	1.63527e+09
Q64428	Trifunctional enzyme subunit alpha, mitochondrial OS=Rattus norvegicus OX=10116 GN=Hadha PE=1 SV=2	1.66446e+09	1.72866e+09	1.69929e+09	1.49624e+09	1.51806e+09	1.51088e+09	1.67475e+09	1.73044e+09	1.45426e+09	1.6889e+09	1.76532e+09	1.671e+09	1.64026e+09	1.64052e+09	1.73737e+09
P11507	Sarcoplasmic/endoplasmic reticulum calcium ATPase 2 OS=Rattus norvegicus OX=10116 GN=Atp2a2 PE=1 SV=1	1.29125e+09	1.36606e+09	1.39367e+09	1.30283e+09	1.33281e+09	1.35982e+09	1.2872e+09	1.4315e+09	1.5865e+09	1.36904e+09	1.42497e+09	1.20526e+09	1.33588e+09	1.39114e+09	1.25943e+09
F8WFM2	Beta-soluble NSF attachment protein OS=Rattus norvegicus OX=10116 GN=Napb PE=4 SV=1	1.45837e+09	1.49609e+09	1.36946e+09	1.38184e+09	1.41587e+09	1.47898e+09	1.37954e+09	1.3687e+09	1.52745e+09	1.4318e+09	1.59204e+09	1.41105e+09	1.57691e+09	1.40872e+09	1.43308e+09
Q9JKB7	Guanine deaminase OS=Rattus norvegicus OX=10116 GN=Gda PE=1 SV=1	3.40853e+09	3.41953e+09	3.51583e+09	3.12733e+09	3.11019e+09	3.01769e+09	3.25619e+09	3.10485e+09	3.91569e+09	3.32103e+09	3.00729e+09	3.00313e+09	3.28432e+09	3.29199e+09	3.44939e+09
F2Z3Q8	Importin subunit beta-1 OS=Rattus norvegicus OX=10116 GN=Kpnb1 PE=1 SV=1	1.03339e+09	1.00469e+09	1.04201e+09	1.01751e+09	1.01492e+09	9.24001e+08	1.00245e+09	932134660	9.49511e+08	1.07875e+09	9.67569e+08	8.78477e+08	9.48466e+08	9.56937e+08	9.00389e+08
Q64542	Plasma membrane calcium-transporting ATPase 4 OS=Rattus norvegicus OX=10116 GN=Atp2b4 PE=1 SV=1	7.79052e+08	8.34756e+08	8.91225e+08	7.71491e+08	7.28347e+08	7.35041e+08	8.2041e+08	747958493	7.04362e+08	6.80666e+08	6.24947e+08	6.1241e+08	8.21302e+08	7.90765e+08	8.57752e+08
G3V888	ATP-citrate synthase OS=Rattus norvegicus OX=10116 GN=Acly PE=1 SV=1	1.52173e+09	1.58162e+09	1.55973e+09	1.46168e+09	1.50319e+09	1.41124e+09	1.55082e+09	1431883521	1.56141e+09	1.43341e+09	1.3916e+09	1.48949e+09	1.51887e+09	1.44682e+09	1.53073e+09
G3V8C3	Vimentin OS=Rattus norvegicus OX=10116 GN=Vim PE=1 SV=1	4.89181e+09	4.28546e+09	3.59024e+09	7.13875e+09	4.74326e+09	7.61663e+09	3.93298e+09	6.67086e+09	3.56243e+09	4.74813e+09	3.27289e+09	4.83867e+09	2.69914e+09	4.69569e+09	3.67662e+09
Q5XIM9	T-complex protein 1 subunit beta OS=Rattus norvegicus OX=10116 GN=Cct2 PE=1 SV=3	1.84875e+09	1.9211e+09	1.89367e+09	1.46436e+09	1.69229e+09	1.52519e+09	1.8335e+09	1660840507	1.69342e+09	2.04118e+09	1.64013e+09	1.70926e+09	1.72289e+09	1.91727e+09	2.0121e+09
A0A0G2JSW3	Globin a4 OS=Rattus norvegicus OX=10116 GN=Hbb PE=1 SV=1	1.32614e+10	6.29324e+09	7.2354e+09	8.32342e+09	1.08582e+10	1.26354e+10	1.12429e+10	12847242965	7.88333e+09	7.46573e+09	1.10663e+10	6.43207e+09	8.25372e+09	1.20466e+10	8.38407e+09
M0R5J4	Uncharacterized protein OS=Rattus norvegicus OX=10116 PE=3 SV=1	1.51952e+10	1.586e+10	1.5835e+10	1.56208e+10	1.50204e+10	1.59085e+10	1.48288e+10	1.49492e+10	1.41892e+10	1.33827e+10	1.34904e+10	1.4036e+10	1.48312e+10	1.56878e+10	1.55927e+10
B5DFK6	Adaptor-related protein complex 3 subunit delta 1 OS=Rattus norvegicus OX=10116 GN=Ap3d1 PE=1 SV=1	7.1293e+08	7.43119e+08	7.35362e+08	7.13548e+08	7.11931e+08	5.56085e+08	6.66712e+08	6.67603e+08	6.60135e+08	7.44974e+08	6.75315e+08	7.5824e+08	7.61432e+08	7.21851e+08	7.29196e+08
A0A0G2K9J2	V-type proton ATPase subunit H OS=Rattus norvegicus OX=10116 GN=Atp6v1h PE=1 SV=1	1.63079e+09	1.6375e+09	1.60204e+09	1.57514e+09	1.6798e+09	1.66848e+09	1.60619e+09	1.41997e+09	1.71999e+09	1.90013e+09	1.82159e+09	1.77548e+09	1.65397e+09	1.51993e+09	1.58955e+09
M0R660	Glyceraldehyde-3-phosphate dehydrogenase OS=Rattus norvegicus OX=10116 PE=1 SV=1
Q6IMZ3	Annexin OS=Rattus norvegicus OX=10116 GN=Anxa6 PE=1 SV=1	1.95392e+09	2.07626e+09	2.05881e+09	2.2425e+09	2.25802e+09	2.12809e+09	1.86344e+09	2159536843	1.9253e+09	1.94239e+09	1.81601e+09	2.1673e+09	1.9295e+09	2.00985e+09	2.13739e+09
G3V8Q2	Alpha-internexin OS=Rattus norvegicus OX=10116 GN=Ina PE=1 SV=1	9.38125e+08	1.02442e+09	1.0997e+09	1.20913e+09	1.0061e+09	1.00894e+09	9.0275e+08	1029883328	8.99275e+08	7.58829e+08	9.09369e+08	1.0355e+09	9.7085e+08	1.0488e+09	1.00817e+09
A0A0G2K9Q6	Calcium-transporting ATPase OS=Rattus norvegicus OX=10116 GN=Atp2b3 PE=1 SV=1	5.83395e+08	5.64249e+08	5.54036e+08	5.77461e+08	5.1869e+08	5.14132e+08	5.79028e+08	5.1533e+08	5.66343e+08	5.73234e+08	5.81012e+08	5.46632e+08	5.67144e+08	5.50654e+08	5.29036e+08
P62630	Elongation factor 1-alpha 1 OS=Rattus norvegicus OX=10116 GN=Eef1a1 PE=2 SV=1	2.7788e+09	2.79522e+09	2.45174e+09	2.29209e+09	2.57881e+09	2.35288e+09	2.82172e+09	2.64744e+09	3.00702e+09	2.57911e+09	2.37503e+09	2.44078e+09	2.6143e+09	2.6589e+09	2.57293e+09
Q6AY56	Tubulin alpha-8 chain OS=Rattus norvegicus OX=10116 GN=Tuba8 PE=2 SV=1	5.16163e+06	6.03758e+06	5.04396e+06	4.30002e+06	4.9201e+06	6.08837e+06	6.84628e+06	4.1496e+06	4.62171e+06	6.68969e+06	5.51786e+06		5.27108e+06	4.83045e+06	7.15697e+06
P63086	Mitogen-activated protein kinase 1 OS=Rattus norvegicus OX=10116 GN=Mapk1 PE=1 SV=3	1.61303e+09	1.70906e+09	1.78594e+09	1.63776e+09	1.58873e+09	1.5965e+09	1.57366e+09	1.54342e+09	1.66542e+09	1.88436e+09	1.65364e+09	1.65923e+09	1.70164e+09	1.62601e+09	1.68366e+09
P85834	Elongation factor Tu, mitochondrial OS=Rattus norvegicus OX=10116 GN=Tufm PE=1 SV=1	2.37693e+09	2.33745e+09	2.33882e+09	2.28703e+09	2.30173e+09	2.20442e+09	2.31705e+09	2.2058e+09	2.45867e+09	2.36261e+09	2.53798e+09	2.46695e+09	2.34867e+09	2.1708e+09	2.26289e+09
P06761	Endoplasmic reticulum chaperone BiP OS=Rattus norvegicus OX=10116 GN=Hspa5 PE=1 SV=1	2.57964e+09	2.55934e+09	2.60998e+09	2.50326e+09	2.36327e+09	2.51362e+09	2.45486e+09	2488400524	2.16735e+09	2.6729e+09	2.35193e+09	2.39205e+09	2.45738e+09	2.37928e+09	2.43827e+09
F1M7Y3	RAP1, GTP-GDP dissociation stimulator 1 (Predicted), isoform CRA_b OS=Rattus norvegicus OX=10116 GN=Rap1gds1 PE=1 SV=2	1.25483e+07	1.4353e+07	1.01289e+07	1.16921e+07	1.63159e+07	1.24031e+07	1.63094e+07	1.20241e+07	1.75396e+07	1.46717e+07	1.75655e+07	1.4054e+07	1.20864e+07	9.41215e+06	1.29381e+07
Q920L2	Succinate dehydrogenase [ubiquinone] flavoprotein subunit, mitochondrial OS=Rattus norvegicus OX=10116 GN=Sdha PE=1 SV=1	2.74018e+09	2.76122e+09	2.70718e+09	2.67989e+09	2.4539e+09	2.4346e+09	2.43486e+09	2.49179e+09	2.59598e+09	2.51875e+09	2.71599e+09	2.65181e+09	2.61834e+09	2.52613e+09	2.48251e+09
G3V852	RCG55135, isoform CRA_b OS=Rattus norvegicus OX=10116 GN=Tln1 PE=1 SV=1	2.06097e+08	2.19305e+08	2.26735e+08	2.74127e+08	2.85121e+08	3.4446e+08	1.88636e+08	3.73986e+08	1.75245e+08	1.77225e+08	1.4604e+08	2.14137e+08	1.98304e+08	2.47276e+08	2.29984e+08
A0A0G2K1D2	RAP1, GTP-GDP dissociation stimulator 1 (Predicted), isoform CRA_a OS=Rattus norvegicus OX=10116 GN=Rap1gds1 PE=1 SV=1	1.38106e+07	1.501e+07	1.4632e+07	1.77902e+07	1.46467e+07	1.60384e+07	1.14048e+07	17691851	1.72768e+07	1.54197e+07	1.13552e+07	1.44099e+07	1.89187e+07	1.61382e+07	1.43444e+07
Q62910	Synaptojanin-1 OS=Rattus norvegicus OX=10116 GN=Synj1 PE=1 SV=3	1.55172e+08	2.0303e+08	2.09496e+08	2.60084e+08	1.69402e+08	1.74533e+08	1.95667e+08	2.48149e+08	2.29675e+09	2.26023e+08	2.8948e+08	5.92482e+08	4.52739e+08	2.18343e+08	3.91373e+08
A0A0G2JVH4	MICOS complex subunit MIC60 OS=Rattus norvegicus OX=10116 GN=Immt PE=1 SV=1	2.49268e+09	2.47e+09	2.61931e+09	2.36912e+09	2.39238e+09	2.23182e+09	2.29757e+09	2.35336e+09	2.27027e+09	2.24911e+09	2.26315e+09	2.27839e+09	2.50396e+09	2.39614e+09	2.54734e+09
F1LMR7	Dipeptidyl aminopeptidase-like protein 6 OS=Rattus norvegicus OX=10116 GN=Dpp6 PE=1 SV=2	1.50774e+09	1.51488e+09	1.51922e+09	1.36537e+09	1.46355e+09	1.5396e+09	1.44944e+09	1.29105e+09	1.29415e+09	1.47372e+09	1.56747e+09	1.4376e+09	1.48001e+09	1.3801e+09	1.27629e+09
D3ZDT1	Erythrocyte membrane protein band 4.1-like 2 OS=Rattus norvegicus OX=10116 GN=Epb41l2 PE=1 SV=3	2.05427e+07	1.75732e+07	1.66505e+07	1.87539e+07		1.98149e+07	1.47353e+07	18562149	1.36626e+07	8.86264e+06	1.03388e+07	1.41999e+07	1.52349e+07	1.05699e+07	1.87506e+07
Q5XIN6	Mitochondrial proton/calcium exchanger protein OS=Rattus norvegicus OX=10116 GN=Letm1 PE=1 SV=1	8.62842e+08	8.78288e+08	8.98313e+08	8.82461e+08	9.23117e+08	8.16854e+08	9.40842e+08	806428518	8.7738e+08	8.82551e+08	9.39602e+08	8.86562e+08	8.78958e+08	8.71675e+08	8.91231e+08
Q6P502	T-complex protein 1 subunit gamma OS=Rattus norvegicus OX=10116 GN=Cct3 PE=1 SV=1	2.50343e+09	2.79754e+09	2.97036e+09	2.96472e+09	2.76349e+09	2.49489e+09	2.6729e+09	2.6123e+09	2.43071e+09	2.90046e+09	2.72958e+09	2.85807e+09	2.82786e+09	2.79603e+09	2.85862e+09
D3ZC55	Heat shock 70kDa protein 12A (Predicted), isoform CRA_a OS=Rattus norvegicus OX=10116 GN=Hspa12a PE=1 SV=1	1.81523e+09	1.937e+09	1.85424e+09	1.96309e+09	1.9046e+09	1.80702e+09	2.01905e+09	1.85445e+09	2.1179e+09	1.80931e+09	1.84501e+09	1.82283e+09	1.98682e+09	1.9757e+09	1.96937e+09
A0A0G2JWM2	NAD-dependent protein deacetylase OS=Rattus norvegicus OX=10116 GN=Sirt2 PE=1 SV=1	2.22062e+09	2.23612e+09	2.08862e+09	2.57983e+09	2.63963e+09	2.81885e+09	2.44101e+09	2.36223e+09	2.37595e+09	1.88939e+09	2.4177e+09	2.80602e+09	2.24643e+09	2.32453e+09	2.07005e+09
D3ZAY7	Erythrocyte membrane protein band 4.1-like 2 OS=Rattus norvegicus OX=10116 GN=Epb41l2 PE=1 SV=3	5.45909e+06	5.59933e+06	4.67016e+06	4.45359e+06	5.19999e+06	4.21408e+06	4.9439e+06	4.65632e+06	5.89578e+06	7.31636e+06	6.78022e+06	4.53846e+06	4.42381e+06		6.3254e+06
B5DFN2	S-adenosylhomocysteine hydrolase-like protein 1 OS=Rattus norvegicus OX=10116 GN=Ahcyl1 PE=1 SV=2	1.42825e+09	1.4073e+09	1.49322e+09	1.33446e+09	1.5078e+09	1.28239e+09	1.35068e+09	1.30306e+09	1.12303e+09	1.47325e+09	1.43919e+09	1.34534e+09	1.3766e+09	1.50423e+09	1.50795e+09
D3ZVQ0	Ubiquitin carboxyl-terminal hydrolase OS=Rattus norvegicus OX=10116 GN=Usp5 PE=1 SV=1	1.00031e+09	9.98605e+08	9.84935e+08	8.7247e+08	1.02055e+09	9.31664e+08	1.00541e+09	9.80607e+08	1.09373e+09	1.1333e+09	1.02687e+09	9.19998e+08	9.8698e+08	9.01496e+08	8.92576e+08
P47819	Glial fibrillary acidic protein OS=Rattus norvegicus OX=10116 GN=Gfap PE=1 SV=2	1.56265e+10	1.87009e+10	1.52274e+10	1.85343e+10	1.32255e+10	1.85815e+10	1.74187e+10	1.98801e+10	1.16123e+10	1.53316e+10	9.51981e+09	1.76065e+10	1.44093e+10	1.96476e+10	1.62945e+10
A0A0G2QC06	Serotransferrin OS=Rattus norvegicus OX=10116 GN=Tf PE=1 SV=1	7.83658e+07	1.05809e+08	1.10698e+08	1.17854e+08	9.71905e+07	7.24955e+07	7.96709e+07	9.69907e+07	8.52662e+07	1.10383e+08	9.02663e+07	1.23324e+08	9.54282e+07	1.02918e+08	9.15198e+07
Q6P6V0	Glucose-6-phosphate isomerase OS=Rattus norvegicus OX=10116 GN=Gpi PE=1 SV=1	6.38896e+09	6.8104e+09	6.71416e+09	6.95308e+09	6.42146e+09	6.06601e+09	7.23957e+09	6.73302e+09	7.03027e+09	7.24108e+09	6.57787e+09	7.07951e+09	6.69876e+09	6.46808e+09	7.34445e+09
O08839	Myc box-dependent-interacting protein 1 OS=Rattus norvegicus OX=10116 GN=Bin1 PE=1 SV=1	1.307e+09	1.38378e+09	1.29426e+09	1.32217e+09	1.28273e+09	1.2575e+09	1.17476e+09	1.30125e+09	1.4693e+09	1.32201e+09	1.39858e+09	1.2692e+09	1.26761e+09	1.23098e+09	1.21154e+09
A0A0A0MY09	Endoplasmin OS=Rattus norvegicus OX=10116 GN=Hsp90b1 PE=1 SV=1	2.13259e+09	2.17747e+09	2.26529e+09	2.0399e+09	1.98044e+09	1.88327e+09	2.12908e+09	2.12575e+09	1.89443e+09	2.28619e+09	1.95762e+09	1.95633e+09	2.12772e+09	2.14444e+09	2.06177e+09
P55161	Nck-associated protein 1 OS=Rattus norvegicus OX=10116 GN=Nckap1 PE=2 SV=1	6.33227e+08	7.01829e+08	6.82657e+08	6.37494e+08	6.53524e+08	5.22137e+08	6.68649e+08	6.02918e+08	8.1077e+08	6.77764e+08	5.97475e+08	6.32653e+08	7.10299e+08	6.6618e+08	6.37764e+08
F1LNP4	Solute carrier family 12 member 5 OS=Rattus norvegicus OX=10116 GN=Slc12a5 PE=1 SV=3	1.52041e+09	1.52996e+09	1.52829e+09	1.50801e+09	1.68327e+09	1.60268e+09	1.56684e+09	1.43244e+09	1.65698e+09	1.53262e+09	1.73035e+09	1.6577e+09	1.57835e+09	1.46943e+09	1.47391e+09
P62632	Elongation factor 1-alpha 2 OS=Rattus norvegicus OX=10116 GN=Eef1a2 PE=1 SV=1	1.71298e+09	1.20161e+09	1.03892e+09	1.04414e+09	1.36761e+09	1.22048e+09	1.15046e+09	963308846	1.39586e+09	1.32895e+09	1.40538e+09	1.24861e+09	1.14403e+09	1.00297e+09	9.79312e+08
Q99JD4	CLIP-associating protein 2 OS=Rattus norvegicus OX=10116 GN=Clasp2 PE=1 SV=1	5.07962e+08	4.81233e+08	5.27404e+08	5.50113e+08	5.26382e+08	3.88754e+08	4.76875e+08	4.50145e+08	4.80072e+08	4.93655e+08	4.39858e+08	4.7407e+08	4.72197e+08	4.91453e+08	4.86211e+08
D4ACB8	Chaperonin subunit 8 (Theta) (Predicted), isoform CRA_a OS=Rattus norvegicus OX=10116 GN=Cct8 PE=1 SV=1	2.04837e+09	2.0915e+09	2.16315e+09	1.92192e+09	1.97591e+09	1.70754e+09	2.0904e+09	1.96177e+09	1.78778e+09	2.21861e+09	1.89196e+09	2.01668e+09	1.97954e+09	1.92833e+09	1.87702e+09
Q75Q39	Mitochondrial import receptor subunit TOM70 OS=Rattus norvegicus OX=10116 GN=Tomm70 PE=1 SV=1	1.48422e+09	1.47147e+09	1.53621e+09	1.54514e+09	1.51729e+09	1.62412e+09	1.54976e+09	1347157377	1.67398e+09	1.57557e+09	1.59779e+09	1.56958e+09	1.50409e+09	1.39553e+09	1.47192e+09
P14046	Alpha-1-inhibitor 3 OS=Rattus norvegicus OX=10116 GN=A1i3 PE=1 SV=1	3.09127e+08	1.59784e+08	1.85052e+08	2.16825e+08	2.15635e+08	2.20265e+08	2.46938e+08	3.15369e+08	1.75063e+08	1.77136e+08	1.80607e+08	1.35028e+08	1.82507e+08	3.12039e+08	1.98396e+08
Q00981	Ubiquitin carboxyl-terminal hydrolase isozyme L1 OS=Rattus norvegicus OX=10116 GN=Uchl1 PE=1 SV=2	9.33726e+09	1.02774e+10	1.10299e+10	1.04221e+10	9.79382e+09	9.90254e+09	1.053e+10	9.84649e+09	9.47439e+09	1.08646e+10	9.58302e+09	1.01604e+10	1.01124e+10	9.82532e+09	1.06352e+10
Q9Z1E1	Flotillin-1 OS=Rattus norvegicus OX=10116 GN=Flot1 PE=2 SV=2	1.75002e+09	1.81607e+09	1.87156e+09	1.72464e+09	1.72627e+09	1.70287e+09	1.73689e+09	1.66605e+09	1.62457e+09	6.27006e+08	5.07948e+08	5.31218e+08	1.82175e+09	1.71868e+09	1.7083e+09
A0A0H2UHM5	Protein disulfide-isomerase OS=Rattus norvegicus OX=10116 GN=Pdia3 PE=1 SV=1	3.15924e+09	3.11047e+09	3.47952e+09	3.05699e+09	3.19541e+09	3.2472e+09	3.28508e+09	3.43176e+09	3.08896e+09	3.35021e+09	3.11721e+09	2.87242e+09	3.19013e+09	3.05088e+09	3.31277e+09
A0A1K0FUA6	Globin a2 OS=Rattus norvegicus OX=10116 GN=LOC689064 PE=3 SV=1	6.55141e+09	3.09028e+09	3.70428e+09	4.27196e+09	4.88396e+09	5.59607e+09	5.85377e+09	6590306246	3.66151e+09	3.8546e+09	5.26667e+09	3.34913e+09	4.22308e+09	6.30106e+09	4.24524e+09
Q6P136	Hyou1 protein OS=Rattus norvegicus OX=10116 GN=Hyou1 PE=1 SV=1	6.94909e+08	7.04487e+08	7.38356e+08	6.8438e+08	7.31736e+08	6.83557e+08	6.90552e+08	6.2935e+08	6.16207e+08	8.20066e+08	7.10633e+08	6.99869e+08	6.80911e+08	7.07545e+08	7.64268e+08
O35567	Bifunctional purine biosynthesis protein PURH OS=Rattus norvegicus OX=10116 GN=Atic PE=1 SV=2	1.1464e+09	1.20118e+09	1.20073e+09	1.03595e+09	1.09751e+09	1.1089e+09	1.12979e+09	1.07494e+09	9.73399e+08	1.39794e+09	1.24152e+09	1.24857e+09	1.05223e+09	1.10578e+09	1.16599e+09
F1LUE2	Calcium/calmodulin-dependent protein kinase II, beta, isoform CRA_c OS=Rattus norvegicus OX=10116 GN=Camk2b PE=1 SV=2	9.08476e+08	9.30175e+08	9.60536e+08	8.4762e+08	9.06867e+08	9.01026e+08	8.98732e+08	8.79768e+08	1.2404e+09	9.91784e+08	9.5197e+08	8.66294e+08	1.00253e+09	9.51269e+08	9.40692e+08
Q05683	Glutamate decarboxylase 2 OS=Rattus norvegicus OX=10116 GN=Gad2 PE=1 SV=1	2.29684e+09	2.39922e+09	2.25281e+09	2.3346e+09	2.38851e+09	2.18378e+09	2.29969e+09	1.91524e+09	2.37287e+09	2.6582e+09	2.64241e+09	2.32515e+09	2.34149e+09	2.17742e+09	2.20251e+09
A0A0G2JT93	Catenin (Cadherin associated protein), beta 1, isoform CRA_a OS=Rattus norvegicus OX=10116 GN=Ctnnb1 PE=1 SV=1	2.43004e+06	2.10596e+06	3.15336e+06		3.68621e+06	4.11595e+06			4.46238e+06	1.15367e+06	1.36913e+06	3.51746e+06	1.67122e+06		1.37751e+06
Q2TA68	Dynamin-like 120 kDa protein, mitochondrial OS=Rattus norvegicus OX=10116 GN=Opa1 PE=1 SV=1	8.75993e+08	9.15208e+08	9.16847e+08	8.41027e+08	8.24866e+08	8.74095e+08	8.93371e+08	8.52117e+08	9.65682e+08	8.79789e+08	8.97853e+08	8.53484e+08	9.20932e+08	8.42918e+08	9.26304e+08
Q4QQV0	Tubulin beta chain OS=Rattus norvegicus OX=10116 GN=Tubb6 PE=1 SV=1	3.04139e+06	3.13596e+06		6.29318e+06	2.41554e+06	2.03576e+06		7.00125e+06	5.63329e+06	1.97937e+06		5.67933e+06	2.71993e+06	1.72463e+06	7.25404e+06
Q45QN0	Guanine nucleotide binding protein alpha inhibiting 2 OS=Rattus norvegicus OX=10116 GN=Gnai2 PE=2 SV=1	1.57325e+09	1.68985e+09	1.69223e+09	1.62507e+09	1.56982e+09	1.59453e+09	1.69735e+09	1.64156e+09	1.35076e+09	1.79665e+09	1.55715e+09	1.54771e+09	1.53405e+09	1.55875e+09	1.75859e+09
O35814	Stress-induced-phosphoprotein 1 OS=Rattus norvegicus OX=10116 GN=Stip1 PE=1 SV=1	2.76863e+09	2.72902e+09	2.79755e+09	2.52215e+09	2.54078e+09	2.58446e+09	2.53942e+09	2.45912e+09	2.33822e+09	2.83914e+09	2.57492e+09	2.56627e+09	2.71669e+09	2.62566e+09	2.72508e+09
D3ZPC4	Neural cell adhesion molecule L1 OS=Rattus norvegicus OX=10116 GN=L1cam PE=1 SV=2	1.00203e+09	9.97737e+08	9.88057e+08	9.23639e+08	1.04539e+09	9.38558e+08	9.17491e+08	906357136	1.00303e+09	1.04652e+09	1.04146e+09	9.6975e+08	1.0145e+09	9.0136e+08	1.00406e+09
P61265	Syntaxin-1B OS=Rattus norvegicus OX=10116 GN=Stx1b PE=1 SV=1	4.59414e+09	4.82448e+09	4.76181e+09	4.62468e+09	4.69034e+09	4.25659e+09	4.60978e+09	4.30474e+09	4.79025e+09	4.61545e+09	4.55207e+09	4.37733e+09	4.85424e+09	4.56182e+09	4.68425e+09
Q5BJT9	Creatine kinase U-type, mitochondrial OS=Rattus norvegicus OX=10116 GN=Ckmt1 PE=1 SV=1	5.09366e+09	5.41801e+09	5.22728e+09	5.26011e+09	5.08288e+09	4.8926e+09	5.01739e+09	4880942010	5.30172e+09	4.88763e+09	5.5774e+09	5.44112e+09	5.4139e+09	4.77385e+09	5.06629e+09
P59215	Guanine nucleotide-binding protein G(o) subunit alpha OS=Rattus norvegicus OX=10116 GN=Gnao1 PE=1 SV=2	8.12206e+09	8.33276e+09	8.77957e+09	8.57171e+09	7.9385e+09	7.84039e+09	8.59059e+09	7.98799e+09	8.62752e+09	7.82688e+09	8.00479e+09	8.01646e+09	8.75701e+09	8.35272e+09	8.58839e+09
P12346	Serotransferrin OS=Rattus norvegicus OX=10116 GN=Tf PE=1 SV=3	1.58209e+08	1.19784e+08	1.11353e+08	1.36923e+08	1.35618e+08	1.47023e+08	1.43002e+08	176528024	1.1556e+08	1.11217e+08	1.06543e+08	1.26583e+08	1.27461e+08	1.66265e+08	1.16257e+08
P54921	Alpha-soluble NSF attachment protein OS=Rattus norvegicus OX=10116 GN=Napa PE=1 SV=2	7.72887e+08	8.0131e+08	7.99628e+08	7.86268e+08	7.84129e+08	7.55026e+08	8.11759e+08	755918052	7.49636e+08	7.12984e+08	7.29513e+08	7.11154e+08	8.40748e+08	7.74087e+08	7.79157e+08
D3ZKP9	Voltage-dependent calcium channel subunit alpha-2/delta-1 OS=Rattus norvegicus OX=10116 GN=Cacna2d1 PE=1 SV=3	8.79083e+08	9.84821e+08	1.00019e+09	8.68413e+08	8.25957e+08	8.15182e+08	8.08275e+08	8.72806e+08	9.06913e+08	9.49798e+08	8.76725e+08	8.60571e+08	9.2294e+08	8.29062e+08	8.8666e+08
P31596	Excitatory amino acid transporter 2 OS=Rattus norvegicus OX=10116 GN=Slc1a2 PE=1 SV=2	6.86901e+09	7.55822e+09	7.51644e+09	6.24393e+09	6.40569e+09	6.08314e+09	7.08137e+09	6.3668e+09	6.92094e+09	7.65004e+09	7.32826e+09	7.13113e+09	6.79176e+09	6.81955e+09	7.15262e+09
F1M953	Stress-70 protein, mitochondrial OS=Rattus norvegicus OX=10116 GN=Hspa9 PE=1 SV=1	2.07593e+09	2.02427e+09	2.11949e+09	2.00656e+09	2.02355e+09	2.06753e+09	2.10973e+09	1996988722	2.02309e+09	1.9089e+09	1.89276e+09	1.9902e+09	2.05927e+09	2.11138e+09	2.19912e+09
Q4FZT9	26S proteasome non-ATPase regulatory subunit 2 OS=Rattus norvegicus OX=10116 GN=Psmd2 PE=1 SV=1	6.03454e+08	6.18056e+08	6.44009e+08	5.95987e+08	5.98115e+08	5.86193e+08	5.98518e+08	5.81501e+08	5.4646e+08	6.75252e+08	6.00934e+08	6.20865e+08	6.0331e+08	5.89557e+08	5.7936e+08
A0A0G2K261	Isoleucyl-tRNA synthetase 2, mitochondrial OS=Rattus norvegicus OX=10116 GN=Iars2 PE=1 SV=1	8.31525e+08	8.22139e+08	8.19889e+08	7.73696e+08	8.2626e+08	7.96361e+08	7.9307e+08	7.77344e+08	8.15615e+08	8.57339e+08	8.24563e+08	7.75189e+08	8.81623e+08	8.05099e+08	8.15531e+08
Q924N5	Long-chain-fatty-acid--CoA ligase ACSBG1 OS=Rattus norvegicus OX=10116 GN=Acsbg1 PE=1 SV=1	1.07205e+09	1.13815e+09	1.18341e+09	1.09062e+09	1.10139e+09	9.412e+08	9.81873e+08	1.04115e+09	9.36795e+08	1.19609e+09	1.1497e+09	1.16518e+09	1.08125e+09	1.18623e+09	1.17605e+09
D3ZZ99	Alpha-adducin OS=Rattus norvegicus OX=10116 GN=Add1 PE=1 SV=3	1.31841e+07	1.2767e+07	1.38075e+07	1.03872e+07	1.18303e+07	1.38548e+07	1.16237e+07	1.19093e+07	1.16962e+07	1.22349e+07	1.11279e+07	1.03906e+07	1.34642e+07	1.16885e+07	1.10964e+07
Q641Y2	NADH dehydrogenase [ubiquinone] iron-sulfur protein 2, mitochondrial OS=Rattus norvegicus OX=10116 GN=Ndufs2 PE=1 SV=1	1.6665e+09	1.71253e+09	1.84656e+09	1.73023e+09	1.99267e+09	1.66398e+09	1.6781e+09	1.63453e+09	1.73997e+09	1.92658e+09	1.95669e+09	1.92573e+09	1.72403e+09	1.64362e+09	1.76975e+09
P13221	Aspartate aminotransferase, cytoplasmic OS=Rattus norvegicus OX=10116 GN=Got1 PE=1 SV=3	5.33544e+09	5.61893e+09	6.03964e+09	5.70594e+09	5.78834e+09	5.65539e+09	5.25175e+09	5.53228e+09	5.77454e+09	5.09503e+09	5.67459e+09	5.57476e+09	6.05246e+09	5.68634e+09	5.77614e+09
A0A0G2JSV0	N-myc downstream regulated gene 2, isoform CRA_a OS=Rattus norvegicus OX=10116 GN=Ndrg2 PE=1 SV=1	3.61238e+09	3.86172e+09	3.81895e+09	3.70491e+09	3.61331e+09	3.73647e+09	4.10882e+09	3.57027e+09	3.13984e+09	4.09917e+09	4.17258e+09	3.97205e+09	3.73227e+09	3.51017e+09	3.74493e+09
A0A0G2JSV6	Globin c2 OS=Rattus norvegicus OX=10116 GN=Hba-a2 PE=1 SV=1	4.40148e+10	2.2808e+10	2.35486e+10	3.10076e+10	3.84286e+10	4.2573e+10	4.69017e+10	4.89831e+10	2.91156e+10	3.00337e+10	4.03931e+10	2.54301e+10	3.17663e+10	4.59579e+10	3.33624e+10
A0A0G2JTL5	Pyruvate carboxylase, mitochondrial OS=Rattus norvegicus OX=10116 GN=Pc PE=1 SV=1	1.07016e+09	1.0226e+09	1.10079e+09	1.04266e+09	1.00811e+09	9.50046e+08	1.004e+09	1.01557e+09	1.06176e+09	9.22416e+08	1.05909e+09	9.3801e+08	1.05279e+09	9.59633e+08	9.83687e+08
A0A0G2JSM7	Adducin 1 (Alpha), isoform CRA_b OS=Rattus norvegicus OX=10116 GN=Add1 PE=1 SV=1	1.92208e+08	2.08434e+08	2.27682e+08	2.01664e+08	1.94674e+08	1.99481e+08	1.62121e+08	201508964	2.17998e+08	2.00152e+08	1.99707e+08	1.60853e+08	2.08333e+08	2.15421e+08	2.12097e+08
Q64548	Reticulon-1 OS=Rattus norvegicus OX=10116 GN=Rtn1 PE=1 SV=1	1.0941e+09	1.13877e+09	1.22266e+09	1.18156e+09	1.01672e+09	1.03314e+09	1.10052e+09	1086225536	8.28114e+08	1.16986e+09	1.16476e+09	1.03202e+09	1.16588e+09	1.13923e+09	1.23788e+09
Q924S5	Lon protease homolog, mitochondrial OS=Rattus norvegicus OX=10116 GN=Lonp1 PE=2 SV=1	8.15124e+08	9.01118e+08	7.87974e+08	9.19273e+08	8.12903e+08	7.03734e+08	8.00676e+08	7.39529e+08	8.32743e+08	7.72338e+08	7.62393e+08	7.10301e+08	6.55426e+08	9.03475e+08	7.58085e+08
Q9WU82	Catenin beta-1 OS=Rattus norvegicus OX=10116 GN=Ctnnb1 PE=1 SV=1
P19527	Neurofilament light polypeptide OS=Rattus norvegicus OX=10116 GN=Nefl PE=1 SV=3	5.0011e+09	5.25842e+09	5.33137e+09	6.64215e+09	5.69121e+09	6.65065e+09	5.2317e+09	5.77152e+09	5.61394e+09	3.34086e+09	4.62141e+09	6.3403e+09	5.27257e+09	6.00031e+09	5.08756e+09
Q6P6R2	Dihydrolipoyl dehydrogenase, mitochondrial OS=Rattus norvegicus OX=10116 GN=Dld PE=1 SV=1	2.85844e+09	2.99887e+09	3.10753e+09	2.89108e+09	2.94084e+09	2.73904e+09	2.76197e+09	2803196731	3.07834e+09	2.92427e+09	3.05215e+09	2.78533e+09	2.90453e+09	2.85528e+09	2.83771e+09
O70511	Ankyrin-3 OS=Rattus norvegicus OX=10116 GN=Ank3 PE=1 SV=3	1.4462e+07	1.19346e+07	1.28226e+07	1.53801e+07	1.57122e+07	1.77149e+07	1.54409e+07	16837426	1.47649e+07	1.5876e+07	1.10201e+07	1.81625e+07	1.5422e+07	8.14371e+06	1.03503e+07
P10687	1-phosphatidylinositol 4,5-bisphosphate phosphodiesterase beta-1 OS=Rattus norvegicus OX=10116 GN=Plcb1 PE=1 SV=1	4.49109e+08	4.40132e+08	3.98348e+08	3.70634e+08	3.91431e+08	3.68737e+08	3.99119e+08	3.73262e+08	6.00508e+08	4.47482e+08	4.63991e+08	3.98186e+08	4.15192e+08	4.15609e+08	4.12476e+08
D3ZCG2	Kinesin family member 21A OS=Rattus norvegicus OX=10116 GN=Kif21a PE=1 SV=2	4.57284e+08	4.84873e+08	5.34304e+08	4.70672e+08	4.0103e+08	3.94991e+08	4.81742e+08	4.61245e+08	4.32129e+08	4.63756e+08	4.40505e+08	4.20455e+08	4.60918e+08	4.78005e+08	4.99307e+08
P48500	Triosephosphate isomerase OS=Rattus norvegicus OX=10116 GN=Tpi1 PE=1 SV=2	9.31534e+09	9.56619e+09	9.17085e+09	8.84248e+09	9.19081e+09	8.79935e+09	9.10466e+09	9.30915e+09	9.30145e+09	9.12501e+09	9.64339e+09	9.20499e+09	9.6917e+09	8.94532e+09	9.21778e+09
Q08163	Adenylyl cyclase-associated protein 1 OS=Rattus norvegicus OX=10116 GN=Cap1 PE=1 SV=3	9.92002e+08	9.76774e+08	9.4616e+08	9.21502e+08	9.36808e+08	9.16325e+08	9.69127e+08	9.56717e+08	1.24021e+09	8.97767e+08	9.04623e+08	9.1888e+08	9.0344e+08	9.37827e+08	9.68604e+08
D4AE00	AP-3 complex subunit beta OS=Rattus norvegicus OX=10116 GN=Ap3b2 PE=1 SV=1	6.63657e+08	6.80995e+08	6.96667e+08	6.67712e+08	6.45097e+08	6.39143e+08	6.37788e+08	6.33003e+08	6.63609e+08	6.85012e+08	6.67181e+08	6.74378e+08	6.9704e+08	6.01267e+08	6.87669e+08
A0A0G2JSR7	Matrin-3 OS=Rattus norvegicus OX=10116 GN=Matr3 PE=1 SV=1	8.80965e+08	9.05703e+08	8.9857e+08	9.3807e+08	8.36832e+08	7.54046e+08	9.04357e+08	9.29708e+08	9.89447e+08	1.01129e+09	8.96922e+08	9.20056e+08	8.81712e+08	8.21872e+08	9.98251e+08
A0A0G2K8V2	Vinculin OS=Rattus norvegicus OX=10116 GN=Vcl PE=1 SV=1	3.68471e+08	3.74164e+08	3.87146e+08	4.55775e+08	5.54945e+08	5.06679e+08	3.80622e+08	6.49399e+08	4.2683e+08	3.86942e+08	3.49256e+08	3.7953e+08	3.75593e+08	4.24853e+08	3.7262e+08
A1A5L2	Pgm1 protein (Fragment) OS=Rattus norvegicus OX=10116 GN=Pgm1 PE=2 SV=1	1.95958e+09	2.03234e+09	2.03438e+09	2.02105e+09	1.93536e+09	2.12413e+09	1.85222e+09	1.90361e+09	1.6693e+09	2.12951e+09	2.00526e+09	2.00841e+09	2.05959e+09	1.91037e+09	1.96212e+09
F1LRZ7	Neurofilament heavy polypeptide OS=Rattus norvegicus OX=10116 GN=Nefh PE=1 SV=1	1.39358e+09	1.48149e+09	1.4801e+09	1.92475e+09	1.57893e+09	1.97898e+09	1.44252e+09	1.62674e+09	1.62611e+09	8.88086e+08	1.3154e+09	1.97585e+09	1.72959e+09	1.58731e+09	1.42277e+09
Q6Q0N1	Cytosolic non-specific dipeptidase OS=Rattus norvegicus OX=10116 GN=Cndp2 PE=1 SV=1	7.94646e+08	8.08292e+08	7.9882e+08	7.95976e+08	8.2893e+08	8.55424e+08	8.25226e+08	7.73001e+08	8.44878e+08	8.74995e+08	8.18023e+08	7.91561e+08	7.70262e+08	7.26694e+08	7.26958e+08
D4A781	Importin 5 OS=Rattus norvegicus OX=10116 GN=Ipo5 PE=1 SV=1	4.3979e+08	4.48036e+08	4.50346e+08	4.09453e+08	3.82055e+08	3.43309e+08	3.6769e+08	3.81807e+08	3.65942e+08	4.75011e+08	4.74464e+08	4.3231e+08	4.00099e+08	4.06691e+08	4.56141e+08
P14408	Fumarate hydratase, mitochondrial OS=Rattus norvegicus OX=10116 GN=Fh PE=1 SV=1	1.18015e+09	1.25536e+09	1.22048e+09	1.12452e+09	1.18897e+09	1.12173e+09	1.20071e+09	1.14975e+09	1.2185e+09	1.27081e+09	1.32333e+09	1.27643e+09	1.23051e+09	1.1379e+09	1.20511e+09
O35244	Peroxiredoxin-6 OS=Rattus norvegicus OX=10116 GN=Prdx6 PE=1 SV=3	3.43205e+09	3.72607e+09	3.42436e+09	3.15718e+09	3.42754e+09	3.7136e+09	3.62843e+09	3.38764e+09	3.06871e+09	4.21432e+09	3.8496e+09	4.11108e+09	3.4713e+09	3.55928e+09	3.51697e+09
D3ZAN3	Alpha glucosidase 2 alpha neutral subunit (Predicted) OS=Rattus norvegicus OX=10116 GN=Ganab PE=1 SV=1	6.99023e+08	7.53663e+08	7.06828e+08	7.13492e+08	8.39775e+08	8.37218e+08	7.58134e+08	7.29796e+08	6.80135e+08	8.64901e+08	7.82919e+08	9.00621e+08	7.19387e+08	6.92004e+08	7.19615e+08
Q68FX0	Isocitrate dehydrogenase [NAD] subunit beta, mitochondrial OS=Rattus norvegicus OX=10116 GN=Idh3B PE=2 SV=1	2.74167e+09	2.89091e+09	2.91988e+09	2.59709e+09	2.7614e+09	2.57364e+09	2.80813e+09	2.65128e+09	2.85299e+09	2.59872e+09	2.72577e+09	2.49779e+09	2.81062e+09	2.68457e+09	2.66266e+09
P18418	Calreticulin OS=Rattus norvegicus OX=10116 GN=Calr PE=1 SV=1	2.94834e+09	3.04057e+09	2.97258e+09	3.24166e+09	2.87802e+09	2.81707e+09	2.90082e+09	2947959866	2.71586e+09	2.99934e+09	2.75771e+09	2.73618e+09	2.98798e+09	2.95573e+09	2.71269e+09
P19643	Amine oxidase [flavin-containing] B OS=Rattus norvegicus OX=10116 GN=Maob PE=1 SV=3	1.73643e+09	1.98736e+09	2.19062e+09	1.77253e+09	1.49046e+09	1.56306e+09	1.71551e+09	1753763943	1.17819e+09	1.77217e+09	1.34152e+09	1.53386e+09	1.65037e+09	2.02608e+09	2.02749e+09
Q3MIE4	Synaptic vesicle membrane protein VAT-1 homolog OS=Rattus norvegicus OX=10116 GN=Vat1 PE=1 SV=1	2.50687e+09	2.38405e+09	2.4701e+09	2.43745e+09	2.34967e+09	2.50724e+09	2.15602e+09	2.39362e+09	1.83429e+09	2.73257e+09	2.3181e+09	2.23959e+09	2.33196e+09	2.32045e+09	2.32694e+09
P04642	L-lactate dehydrogenase A chain OS=Rattus norvegicus OX=10116 GN=Ldha PE=1 SV=1	6.16084e+09	6.27111e+09	5.88839e+09	5.97401e+09	5.83262e+09	5.92938e+09	6.11987e+09	5.86137e+09	6.13211e+09	6.40585e+09	5.78823e+09	5.58719e+09	6.15597e+09	5.87778e+09	5.95094e+09
Q5RKI1	Eukaryotic initiation factor 4A-II OS=Rattus norvegicus OX=10116 GN=Eif4a2 PE=1 SV=1	6.16387e+08	6.95102e+08	7.23306e+08	5.49004e+08	5.90069e+08	4.54946e+08	5.93892e+08	5.88703e+08	6.11211e+08	6.96657e+08	6.33545e+08	6.32252e+08	5.64103e+08	5.88961e+08	5.56688e+08
Q63357	Unconventional myosin-Id OS=Rattus norvegicus OX=10116 GN=Myo1d PE=1 SV=3	4.66507e+08	4.9777e+08	4.69331e+08	5.71024e+08	4.72261e+08	5.25082e+08	5.18778e+08	5.27488e+08	5.00637e+08	3.30036e+08	3.87892e+08	4.7761e+08	5.18135e+08	5.02209e+08	4.84852e+08
A0A0G2K0B6	Clathrin coat assembly protein AP180 OS=Rattus norvegicus OX=10116 GN=Snap91 PE=1 SV=1	1.57106e+09	1.56343e+09	1.46748e+09	1.65923e+09	1.90801e+09	1.62188e+09	1.58616e+09	1510370640	2.11517e+09	1.54881e+09	1.69059e+09	1.60577e+09	1.59882e+09	1.43783e+09	1.50368e+09
A0A0G2K9E0	Ribonuclease inhibitor OS=Rattus norvegicus OX=10116 GN=Rnh1 PE=1 SV=1	6.81011e+08	6.77413e+08	6.45417e+08	6.99989e+08	6.00485e+08	6.43624e+08	5.4639e+08	6.22054e+08	5.55569e+08	6.8021e+08	6.4005e+08	6.15097e+08	6.27914e+08	6.61277e+08	6.11671e+08
G3V8L3	Lamin A, isoform CRA_b OS=Rattus norvegicus OX=10116 GN=Lmna PE=1 SV=1	1.27874e+09	1.17447e+09	1.34026e+09	1.47117e+09	1.52646e+09	1.54632e+09	1.26869e+09	1765534078	1.20346e+09	1.25192e+09	1.14921e+09	1.18584e+09	1.30018e+09	1.29542e+09	1.33966e+09
Q03626	Murinoglobulin-1 OS=Rattus norvegicus OX=10116 GN=Mug1 PE=2 SV=1	1.18326e+08	7.63587e+07	7.88836e+07	8.49346e+07	8.51786e+07	5.75272e+07	5.80878e+07	109076662	7.08405e+07	5.96508e+07	7.04752e+07	5.80711e+07	7.44554e+07	1.12483e+08	7.7081e+07
A0A0G2K1Q7	Ankyrin-3 OS=Rattus norvegicus OX=10116 GN=Ank3 PE=1 SV=1	3.19037e+06	484652	1.80744e+06	1.06791e+06	2.82936e+06	2.73645e+06	2.42011e+06	1.18357e+06	3.08641e+06	2.05092e+06	1.91029e+06	1.67071e+06	3.06067e+06	1.62164e+06	1.46367e+06
P32551	Cytochrome b-c1 complex subunit 2, mitochondrial OS=Rattus norvegicus OX=10116 GN=Uqcrc2 PE=1 SV=2	3.90241e+09	4.01841e+09	4.19295e+09	3.90082e+09	3.89361e+09	3.6338e+09	3.82572e+09	3.72913e+09	4.10519e+09	3.77751e+09	3.96598e+09	3.91931e+09	4.1678e+09	3.86804e+09	3.88915e+09
P42123	L-lactate dehydrogenase B chain OS=Rattus norvegicus OX=10116 GN=Ldhb PE=1 SV=2	1.06816e+10	1.14401e+10	1.21888e+10	1.09307e+10	1.1005e+10	1.10536e+10	1.05844e+10	1.08133e+10	1.14512e+10	1.06083e+10	1.10915e+10	1.12523e+10	1.14626e+10	1.10287e+10	1.19744e+10
Q5GFD9	Protein IMPACT OS=Rattus norvegicus OX=10116 GN=Impact PE=1 SV=1	2.80894e+09	2.88298e+09	2.60696e+09	2.54568e+09	2.70567e+09	2.40857e+09	2.56637e+09	2.47422e+09	2.14117e+09	3.18275e+09	2.90492e+09	2.68349e+09	2.82502e+09	2.51865e+09	2.80178e+09
G3V8A5	Vacuolar protein sorting-associated protein 35 OS=Rattus norvegicus OX=10116 GN=Vps35 PE=1 SV=1	9.47848e+08	1.01484e+09	1.05052e+09	9.48717e+08	9.44513e+08	9.04045e+08	8.30296e+08	9.53567e+08	9.14918e+08	1.00473e+09	9.30278e+08	9.07828e+08	9.69393e+08	8.61462e+08	9.40855e+08
M0R3N4	Vesicle amine transport 1-like OS=Rattus norvegicus OX=10116 GN=Vat1l PE=1 SV=2	3.22683e+09	3.12717e+09	3.15899e+09	3.11769e+09	3.16808e+09	2.88521e+09	3.12902e+09	2.79623e+09	2.59281e+09	3.87734e+09	3.43779e+09	3.32951e+09	3.14858e+09	3.01297e+09	3.23906e+09
F1LQ48	Heterogeneous nuclear ribonucleoprotein L OS=Rattus norvegicus OX=10116 GN=Hnrnpl PE=1 SV=2	7.81035e+08	7.31163e+08	7.94195e+08	7.23191e+08	7.43948e+08	6.80613e+08	7.48284e+08	7.99823e+08	7.99051e+08	7.61199e+08	7.52936e+08	7.40994e+08	7.7077e+08	7.42614e+08	8.24153e+08
P28037	Cytosolic 10-formyltetrahydrofolate dehydrogenase OS=Rattus norvegicus OX=10116 GN=Aldh1l1 PE=1 SV=3	6.42996e+08	7.71712e+08	6.30606e+08	7.36826e+08	6.75845e+08	7.02644e+08	6.78609e+08	8.19551e+08	5.48894e+08	6.16302e+08	5.47277e+08	6.9159e+08	5.92753e+08	7.94605e+08	6.96096e+08
G3V647	Pyridoxal kinase OS=Rattus norvegicus OX=10116 GN=Pdxk PE=1 SV=1	5.63936e+07	1.45073e+08	1.2309e+08	1.20406e+08	1.66257e+08	6.12333e+07	6.45615e+07	41600506	7.92977e+07	2.01883e+08	1.83283e+08	1.84874e+08	1.57282e+08	1.40032e+08	1.39593e+08
O08838	Amphiphysin OS=Rattus norvegicus OX=10116 GN=Amph PE=1 SV=1	9.67011e+08	9.52358e+08	9.66642e+08	9.80823e+08	1.00057e+09	9.46678e+08	8.68168e+08	942487188	1.31577e+09	1.00225e+09	9.5823e+08	9.36367e+08	9.38212e+08	9.29913e+08	9.18186e+08
A0A0H2UHQ0	4F2 cell-surface antigen heavy chain OS=Rattus norvegicus OX=10116 GN=Slc3a2 PE=1 SV=1	1.16623e+09	1.23543e+09	1.21814e+09	1.07001e+09	1.15366e+09	1.11949e+09	1.16449e+09	1165375810	1.03581e+09	1.26205e+09	1.22067e+09	1.2458e+09	1.18513e+09	1.16662e+09	1.24825e+09
A0A0G2KAM3	Pyruvate dehydrogenase E1 component subunit beta, mitochondrial OS=Rattus norvegicus OX=10116 GN=Pdhb PE=1 SV=1	2.42429e+09	2.48828e+09	2.57218e+09	2.27945e+09	2.34432e+09	2.28551e+09	2.37194e+09	2.40479e+09	2.6269e+09	2.33661e+09	2.55451e+09	2.46536e+09	2.53516e+09	2.39867e+09	2.42047e+09
G3V945	Aldehyde dehydrogenase family 5, subfamily A1 OS=Rattus norvegicus OX=10116 GN=Aldh5a1 PE=1 SV=1	1.16349e+09	1.28785e+09	1.34428e+09	1.19425e+09	1.22309e+09	1.21571e+09	1.31011e+09	1.11202e+09	1.24412e+09	1.25287e+09	1.29928e+09	1.22036e+09	1.27636e+09	1.20756e+09	1.27439e+09
P54311	Guanine nucleotide-binding protein G(I)/G(S)/G(T) subunit beta-1 OS=Rattus norvegicus OX=10116 GN=Gnb1 PE=1 SV=4	1.58661e+09	1.72567e+09	1.48269e+09	1.49505e+09	1.55776e+09	1.6747e+09	1.78892e+09	1.55163e+09	1.74591e+09	1.66947e+09	1.48814e+09	1.5722e+09	1.58802e+09	1.68063e+09	1.63616e+09
A0A0G2JTH6	EH domain-containing protein 3 OS=Rattus norvegicus OX=10116 GN=Ehd3 PE=1 SV=1	2.07699e+08	1.94004e+08	2.05218e+08	2.06881e+08	2.40015e+08	2.46179e+08	1.96974e+08	1.99455e+08	2.32131e+08	2.15014e+08	2.32754e+08	2.26783e+08	2.03993e+08	1.99272e+08	1.90871e+08
P10824	Guanine nucleotide-binding protein G(i) subunit alpha-1 OS=Rattus norvegicus OX=10116 GN=Gnai1 PE=1 SV=3	6.62069e+08	7.37796e+08	7.43209e+08	7.6234e+08	7.02546e+08	6.70124e+08	7.18017e+08	6.90551e+08	7.47348e+08	6.77703e+08	6.4577e+08	6.44222e+08	6.84498e+08	6.79351e+08	7.10441e+08
Q9Z2L0	Voltage-dependent anion-selective channel protein 1 OS=Rattus norvegicus OX=10116 GN=Vdac1 PE=1 SV=4	7.75496e+09	8.07512e+09	7.86778e+09	7.74759e+09	8.09119e+09	7.43603e+09	8.39527e+09	6.99695e+09	9.05348e+09	8.17295e+09	8.44476e+09	8.28989e+09	8.15344e+09	7.54432e+09	7.94276e+09
P35565	Calnexin OS=Rattus norvegicus OX=10116 GN=Canx PE=1 SV=1	2.55811e+09	2.65567e+09	2.67663e+09	2.47621e+09	2.45073e+09	2.36402e+09	2.59046e+09	2432967543	2.27041e+09	2.57414e+09	2.40515e+09	2.46457e+09	2.47103e+09	2.49532e+09	2.48198e+09
Q68FY0	Cytochrome b-c1 complex subunit 1, mitochondrial OS=Rattus norvegicus OX=10116 GN=Uqcrc1 PE=1 SV=1	4.3016e+09	4.43413e+09	4.30409e+09	3.92744e+09	3.76871e+09	3.80515e+09	3.75628e+09	3.7625e+09	4.0638e+09	3.67833e+09	3.94173e+09	3.92491e+09	4.05513e+09	3.70621e+09	3.97117e+09
Q7TPB1	T-complex protein 1 subunit delta OS=Rattus norvegicus OX=10116 GN=Cct4 PE=1 SV=3	1.01259e+09	1.05489e+09	1.03078e+09	9.57676e+08	1.06416e+09	1.11885e+09	1.07927e+09	934856157	8.97709e+08	1.26753e+09	1.19897e+09	1.16639e+09	1.01404e+09	9.77274e+08	1.01881e+09
G3V7J0	Aldehyde dehydrogenase family 6, subfamily A1, isoform CRA_b OS=Rattus norvegicus OX=10116 GN=Aldh6a1 PE=1 SV=1	1.51918e+09	1.65838e+09	1.65289e+09	1.59985e+09	1.51997e+09	1.59939e+09	1.52116e+09	1.67061e+09	1.30757e+09	1.67494e+09	1.48021e+09	1.67334e+09	1.49674e+09	1.59961e+09	1.52444e+09
F1LST4	Microtubule-associated protein OS=Rattus norvegicus OX=10116 GN=Mapt PE=1 SV=1	7.03101e+08	7.22105e+08	7.69962e+08	6.10228e+08	6.40545e+08	5.33754e+08	6.86392e+08	613198694	1.24531e+09	6.1235e+08	3.23543e+08	3.73377e+08	6.07391e+08	6.43853e+08	7.36639e+08
A0A0G2K1L8	Brain acid soluble protein 1 OS=Rattus norvegicus OX=10116 GN=Basp1 PE=1 SV=1	2.05588e+09	1.88231e+09	2.29458e+09	2.10937e+09	1.50001e+09	1.77508e+09	2.10571e+09	1.91656e+09	2.14706e+09	1.94528e+09	1.70492e+09	1.90408e+09	2.16664e+09	2.00724e+09	1.75733e+09
Q641Z6	EH domain-containing protein 1 OS=Rattus norvegicus OX=10116 GN=Ehd1 PE=1 SV=1	1.78561e+08	1.7411e+08	1.57205e+08	1.91316e+08	1.85888e+08	1.9586e+08	1.86675e+08	1.7745e+08	1.76678e+08	1.87785e+08	1.69202e+08	1.8417e+08	1.44731e+08	1.65719e+08	1.58359e+08
D4AEH9	Amylo-1, 6-glucosidase, 4-alpha-glucanotransferase (Glycogen debranching enzyme, glycogen storage disease type III) (Predicted), isoform CRA_a OS=Rattus norvegicus OX=10116 GN=Agl PE=1 SV=1	5.66871e+08	5.34227e+08	6.04366e+08	5.63938e+08	5.56988e+08	5.01086e+08	6.02932e+08	5.37722e+08	4.48813e+08	6.20568e+08	6.24003e+08	6.40728e+08	6.16739e+08	5.66344e+08	6.26153e+08
A0A0G2JUC7	Dynactin subunit 2 OS=Rattus norvegicus OX=10116 GN=Dctn2 PE=1 SV=1	1.17057e+09	1.16845e+09	1.17287e+09	1.22562e+09	1.18209e+09	1.20616e+09	1.16223e+09	1.11624e+09	1.14187e+09	1.29539e+09	1.19438e+09	1.24005e+09	1.22544e+09	1.19985e+09	1.24371e+09
G3V6L4	Kinesin-like protein OS=Rattus norvegicus OX=10116 GN=Kif5c PE=1 SV=3	2.95118e+08	2.82504e+08	3.02528e+08	2.90816e+08	2.65902e+08	2.346e+08	2.50034e+08	2.38161e+08	2.34508e+08	2.99568e+08	2.66267e+08	2.72102e+08	2.82163e+08	2.69652e+08	2.97901e+08
P25113	Phosphoglycerate mutase 1 OS=Rattus norvegicus OX=10116 GN=Pgam1 PE=1 SV=4	5.40904e+09	5.75295e+09	5.6826e+09	5.63735e+09	5.48535e+09	5.98233e+09	5.50542e+09	5392636511	5.59165e+09	5.16062e+09	5.55638e+09	5.69285e+09	5.75085e+09	5.22111e+09	5.49671e+09
F1M9F9	Jouberin OS=Rattus norvegicus OX=10116 GN=Ahi1 PE=1 SV=2	6.11629e+08	5.833e+08	6.61409e+08	5.88503e+08	5.5342e+08	4.9671e+08	6.20895e+08	5.30523e+08	5.01578e+08	6.81839e+08	4.98126e+08	4.84303e+08	5.87809e+08	6.00883e+08	6.94985e+08
P10362	Secretogranin-2 OS=Rattus norvegicus OX=10116 GN=Scg2 PE=1 SV=1	4.2448e+09	3.82525e+09	4.19083e+09	3.91617e+09	3.53889e+09	3.65469e+09	3.90482e+09	3.59939e+09	2.78066e+09	4.26358e+09	3.36549e+09	3.54384e+09	3.696e+09	3.88848e+09	3.95579e+09
P11275	Calcium/calmodulin-dependent protein kinase type II subunit alpha OS=Rattus norvegicus OX=10116 GN=Camk2a PE=1 SV=1	2.0047e+09	2.07779e+09	2.11404e+09	1.91011e+09	1.9447e+09	1.85897e+09	2.00284e+09	1.82016e+09	3.56106e+09	1.97439e+09	2.00178e+09	1.84112e+09	1.98935e+09	1.86594e+09	2.10345e+09
P31016	Disks large homolog 4 OS=Rattus norvegicus OX=10116 GN=Dlg4 PE=1 SV=1	5.89075e+08	6.3755e+08	6.94212e+08	6.5785e+08	6.36178e+08	5.28799e+08	6.65958e+08	5.35808e+08	7.15971e+08	7.03917e+08	6.26808e+08	6.71686e+08	6.83211e+08	5.94076e+08	6.84044e+08
Q3MHS9	Chaperonin containing Tcp1, subunit 6A (Zeta 1) OS=Rattus norvegicus OX=10116 GN=Cct6a PE=1 SV=1	1.69748e+09	1.75657e+09	1.76238e+09	1.57918e+09	1.64471e+09	1.59859e+09	1.71834e+09	1.6394e+09	1.54117e+09	1.80361e+09	1.59215e+09	1.70292e+09	1.76264e+09	1.7367e+09	1.82859e+09
Q5XIH3	NADH dehydrogenase [ubiquinone] flavoprotein 1, mitochondrial OS=Rattus norvegicus OX=10116 GN=Ndufv1 PE=1 SV=1	2.86783e+09	2.94494e+09	2.92638e+09	2.7498e+09	2.76382e+09	2.67218e+09	2.70607e+09	2.6565e+09	2.92289e+09	2.7933e+09	2.79936e+09	2.64147e+09	2.94486e+09	2.69283e+09	2.97045e+09
F1LUT4	Phospholipid-transporting ATPase OS=Rattus norvegicus OX=10116 GN=Atp8a1 PE=1 SV=3	8.03157e+08	8.00858e+08	8.02031e+08	7.61855e+08	7.0141e+08	6.16871e+08	8.06509e+08	7.46789e+08	7.97796e+08	8.84342e+08	6.65632e+08	7.64366e+08	7.08563e+08	7.69324e+08	7.94987e+08
P54313	Guanine nucleotide-binding protein G(I)/G(S)/G(T) subunit beta-2 OS=Rattus norvegicus OX=10116 GN=Gnb2 PE=1 SV=4	1.08696e+09	1.22943e+09	1.31467e+09	1.18096e+09	1.17835e+09	1.16445e+09	1.36658e+09	1.21656e+09	1.16974e+09	1.38194e+09	1.15458e+09	1.14372e+09	1.11548e+09	1.13776e+09	1.32327e+09
G3V984	Protein bassoon OS=Rattus norvegicus OX=10116 GN=Bsn PE=4 SV=1	1.07595e+07	6.97383e+06	2.09357e+07	7.21497e+06	5.42792e+06	7.04665e+06	9.71377e+06	9.80023e+06	5.06644e+08	4.81104e+06	8.54689e+06	1.54904e+07	1.96144e+07	1.72568e+07	1.2022e+07
D4AC23	Chaperonin-containing TCP1 subunit 7 OS=Rattus norvegicus OX=10116 GN=Cct7 PE=1 SV=1	1.79751e+09	1.88107e+09	1.90928e+09	1.86699e+09	1.72036e+09	1.70692e+09	1.66074e+09	1720964594	1.52977e+09	1.9404e+09	1.76359e+09	1.82579e+09	1.85101e+09	1.83645e+09	1.9238e+09
Q07266	Drebrin OS=Rattus norvegicus OX=10116 GN=Dbn1 PE=1 SV=3	6.81535e+08	7.21013e+08	7.27446e+08	6.44e+08	6.53145e+08	6.70263e+08	6.99668e+08	642407816	8.03976e+08	7.09747e+08	6.93185e+08	6.43714e+08	6.74621e+08	6.50089e+08	6.87152e+08
P63004	Platelet-activating factor acetylhydrolase IB subunit alpha OS=Rattus norvegicus OX=10116 GN=Pafah1b1 PE=1 SV=2	1.57263e+09	1.67209e+09	1.73311e+09	1.70435e+09	1.51457e+09	1.48532e+09	1.62517e+09	1.53832e+09	1.60955e+09	1.55912e+09	1.41039e+09	1.5904e+09	1.72375e+09	1.64642e+09	1.68692e+09
P56574	Isocitrate dehydrogenase [NADP], mitochondrial OS=Rattus norvegicus OX=10116 GN=Idh2 PE=1 SV=2	1.70947e+09	1.77256e+09	1.78987e+09	1.758e+09	1.67007e+09	1.79381e+09	1.62378e+09	1.93497e+09	1.53146e+09	1.59631e+09	1.51161e+09	1.58295e+09	1.69524e+09	1.72286e+09	1.77865e+09
P04636	Malate dehydrogenase, mitochondrial OS=Rattus norvegicus OX=10116 GN=Mdh2 PE=1 SV=2	1.24849e+10	1.26844e+10	1.2108e+10	1.19094e+10	1.27983e+10	1.32779e+10	1.19481e+10	1.14455e+10	1.39967e+10	1.30793e+10	1.42876e+10	1.32523e+10	1.24143e+10	1.13115e+10	1.2201e+10
G3V8B6	26S proteasome non-ATPase regulatory subunit 1 OS=Rattus norvegicus OX=10116 GN=Psmd1 PE=1 SV=1	4.75416e+08	4.93269e+08	4.76287e+08	4.4292e+08	4.43345e+08	4.54756e+08	4.9306e+08	4.3574e+08	4.32221e+08	4.4467e+08	4.7029e+08	4.09373e+08	4.60464e+08	4.86212e+08	4.83524e+08
F1LRI7	AP2-associated protein kinase 1 OS=Rattus norvegicus OX=10116 GN=Aak1 PE=1 SV=2	3.93854e+07	3.4213e+07	3.66673e+07	5.04938e+07	1.36125e+08	9.86096e+07	3.1724e+07	6.23066e+07	5.88786e+08	3.86462e+07	4.62738e+07	4.71928e+07	3.10709e+07	3.23966e+07	2.87856e+07
A0A0G2K3Q5	Neuronal cell adhesion molecule OS=Rattus norvegicus OX=10116 GN=Nrcam PE=1 SV=1	4.76556e+08	4.81474e+08	5.57244e+08	4.66736e+08	4.80717e+08	5.21336e+08	4.57571e+08	5.70977e+08	5.03724e+08	6.43328e+08	5.61939e+08	5.25595e+08	5.19368e+08	4.56042e+08	5.16321e+08
Q499N5	Acyl-CoA synthetase family member 2, mitochondrial OS=Rattus norvegicus OX=10116 GN=Acsf2 PE=2 SV=1	7.27137e+08	5.98735e+08	6.0536e+08	8.05295e+08	7.0778e+08	7.87064e+08	5.61042e+08	8.13312e+08	5.55462e+08	7.7271e+08	5.67818e+08	6.02735e+08	5.98126e+08	7.25118e+08	7.64764e+08
Q07009	Calpain-2 catalytic subunit OS=Rattus norvegicus OX=10116 GN=Capn2 PE=1 SV=3	5.75334e+08	6.57492e+08	6.47861e+08	6.34634e+08	6.31959e+08	5.62783e+08	6.16856e+08	6.01603e+08	5.54224e+08	5.98219e+08	5.32734e+08	5.88329e+08	6.63953e+08	6.08623e+08	5.82522e+08
F8WFS9	Beta-adducin OS=Rattus norvegicus OX=10116 GN=Add2 PE=1 SV=1	5.62026e+08	5.84997e+08	5.61331e+08	5.27322e+08	5.6642e+08	4.89945e+08	4.88357e+08	509636718	7.52609e+08	5.64302e+08	5.3202e+08	5.13145e+08	5.79811e+08	5.1149e+08	5.57845e+08
Q68FS4	Cytosol aminopeptidase OS=Rattus norvegicus OX=10116 GN=Lap3 PE=1 SV=1	1.01297e+09	1.0783e+09	1.05894e+09	1.03543e+09	1.01714e+09	1.01259e+09	1.02942e+09	1.01013e+09	9.83903e+08	9.87335e+08	1.02838e+09	1.22355e+09	1.05084e+09	1.05278e+09	1.03043e+09
Q6AY84	Secernin-1 OS=Rattus norvegicus OX=10116 GN=Scrn1 PE=1 SV=1	1.57357e+09	1.61178e+09	1.59915e+09	1.63504e+09	1.65199e+09	1.48831e+09	1.28374e+09	1.21451e+09	1.18981e+09	1.91058e+09	1.77533e+09	1.66747e+09	1.64308e+09	1.48053e+09	1.60516e+09
A0A0G2K7G7	Septin-8 OS=Rattus norvegicus OX=10116 GN=Sept8 PE=1 SV=1	7.35008e+08	7.39571e+08	6.92248e+08	7.89954e+08	7.12706e+08	7.42941e+08	7.35682e+08	7.31608e+08	7.59268e+08	6.55624e+08	6.16123e+08	7.45386e+08	6.88009e+08	7.74643e+08	7.09806e+08
Q499P2	Leukotriene A(4) hydrolase OS=Rattus norvegicus OX=10116 GN=Lta4h PE=1 SV=1	4.71457e+08	4.78029e+08	4.23021e+08	3.89825e+08	3.96842e+08	4.07255e+08	4.28354e+08	4.32864e+08	3.796e+08	4.34619e+08	4.50008e+08	4.40812e+08	4.05417e+08	3.80214e+08	4.13942e+08
D3ZBS2	Inter-alpha-trypsin inhibitor heavy chain H3 OS=Rattus norvegicus OX=10116 GN=Itih3 PE=1 SV=3	5.11641e+08	5.3273e+08	5.00588e+08	5.18653e+08	6.2225e+08	7.13311e+08	5.62081e+08	4.50073e+08	3.84152e+08	9.16348e+08	8.10222e+08	7.41806e+08	5.25701e+08	5.07271e+08	5.07293e+08
G3V741	Phosphate carrier protein, mitochondrial OS=Rattus norvegicus OX=10116 GN=Slc25a3 PE=1 SV=1	4.55757e+09	4.90939e+09	4.93527e+09	4.63505e+09	4.3994e+09	4.26387e+09	4.24701e+09	4437629221	4.78524e+09	4.43179e+09	4.52268e+09	4.79734e+09	4.84617e+09	4.47996e+09	4.76157e+09
P41499	Tyrosine-protein phosphatase non-receptor type 11 OS=Rattus norvegicus OX=10116 GN=Ptpn11 PE=1 SV=4	4.89721e+08	5.29298e+08	5.46435e+08	4.6928e+08	4.92331e+08	4.85194e+08	5.26672e+08	4.83249e+08	4.68995e+08	4.87091e+08	4.71227e+08	4.58892e+08	5.00486e+08	5.3013e+08	5.64285e+08
Q63041	Alpha-1-macroglobulin OS=Rattus norvegicus OX=10116 GN=A1m PE=1 SV=1	5.19317e+08	2.33086e+08	2.75258e+08	3.89924e+08	4.42388e+08	3.82607e+08	3.98434e+08	452919287	2.90194e+08	3.02657e+08	5.87262e+08	3.30486e+08	3.24115e+08	4.39792e+08	3.22237e+08
Q5BJZ3	Nicotinamide nucleotide transhydrogenase OS=Rattus norvegicus OX=10116 GN=Nnt PE=1 SV=1	6.09728e+08	6.58184e+08	6.1931e+08	5.90616e+08	6.50562e+08	6.47048e+08	5.80214e+08	6.57133e+08	5.94674e+08	5.4784e+08	5.35245e+08	5.82644e+08	5.88755e+08	5.41261e+08	6.00784e+08
P09606	Glutamine synthetase OS=Rattus norvegicus OX=10116 GN=Glul PE=1 SV=3	5.33271e+09	5.50365e+09	5.62982e+09	5.57982e+09	5.96364e+09	5.9033e+09	5.67652e+09	5.59829e+09	6.05775e+09	7.97592e+09	7.93504e+09	8.36883e+09	5.54577e+09	5.19636e+09	5.42144e+09
Q68FR6	Elongation factor 1-gamma OS=Rattus norvegicus OX=10116 GN=Eef1g PE=2 SV=3	2.02708e+09	2.02411e+09	2.11423e+09	2.00265e+09	1.8106e+09	1.78381e+09	1.81042e+09	1777831774	1.6001e+09	1.94021e+09	1.88219e+09	1.75185e+09	1.75904e+09	1.96665e+09	1.99902e+09
G3V8G4	Brevican core protein OS=Rattus norvegicus OX=10116 GN=Bcan PE=1 SV=1	1.38015e+09	1.33316e+09	1.50193e+09	1.4197e+09	1.37532e+09	1.41886e+09	1.45011e+09	1.35973e+09	1.23471e+09	1.3264e+09	1.42524e+09	1.5189e+09	1.37517e+09	1.45406e+09	1.42078e+09
P27139	Carbonic anhydrase 2 OS=Rattus norvegicus OX=10116 GN=Ca2 PE=1 SV=2	1.61382e+09	1.68484e+09	1.54357e+09	1.6337e+09	1.70434e+09	1.657e+09	1.78589e+09	1.71628e+09	1.75761e+09	1.59485e+09	1.8625e+09	1.96684e+09	1.7587e+09	1.75344e+09	1.57325e+09
Q5XIJ3	Isocitrate dehydrogenase [NAD] subunit, mitochondrial OS=Rattus norvegicus OX=10116 GN=Idh3g PE=1 SV=1	1.47778e+07	1.4584e+07	1.32988e+07	2.11129e+07	1.45862e+07	1.96942e+07	1.21283e+07	12829777	2.63454e+07	1.86644e+07	1.80249e+07	194299	2.16893e+07	1.47722e+07	1.57389e+07
D4A5G8	Pyruvate dehydrogenase E1 component subunit alpha OS=Rattus norvegicus OX=10116 PE=1 SV=3	2.86071e+09	3.10215e+09	3.35481e+09	3.13483e+09	3.04329e+09	3.05035e+09	2.78828e+09	2.91327e+09	3.53125e+09	2.97539e+09	3.14249e+09	3.09154e+09	3.13806e+09	2.96633e+09	3.17903e+09
P85845	Fascin OS=Rattus norvegicus OX=10116 GN=Fscn1 PE=1 SV=2	2.77774e+08	2.8916e+08	2.43294e+08	2.66638e+08	2.62682e+08	2.89203e+08	3.27603e+08	252850861	3.1834e+08	2.70627e+08	2.6538e+08	2.49952e+08	2.7791e+08	2.70735e+08	2.86798e+08
Q2PQA9	Kinesin-1 heavy chain OS=Rattus norvegicus OX=10116 GN=Kif5b PE=1 SV=1	1.83318e+08	1.61177e+08	1.58323e+08	2.00243e+08	1.30188e+08	1.4207e+08	1.41051e+08	1.80047e+08	1.18194e+08	1.62845e+08	1.77366e+08	2.1298e+08	1.49056e+08	1.88855e+08	1.47379e+08
Q66X93	Staphylococcal nuclease domain-containing protein 1 OS=Rattus norvegicus OX=10116 GN=Snd1 PE=1 SV=1	4.13462e+08	3.62944e+08	3.70166e+08	3.89951e+08	3.24012e+08	3.45664e+08	3.49364e+08	3.47414e+08	3.08919e+08	4.14873e+08	4.44712e+08	3.65144e+08	3.29618e+08	3.94552e+08	3.45498e+08
G3V6U3	ALG2, alpha-1,3/1,6-mannosyltransferase OS=Rattus norvegicus OX=10116 GN=Alg2 PE=1 SV=1	7.43246e+08	7.9007e+08	8.13561e+08	8.01922e+08	7.7975e+08	7.30283e+08	7.62593e+08	7.20377e+08	7.01334e+08	8.66054e+08	8.15441e+08	8.17615e+08	7.87188e+08	7.3688e+08	8.24842e+08
F1LS42	Protein kinase C OS=Rattus norvegicus OX=10116 GN=Prkcb PE=1 SV=2	4.171e+08	4.31862e+08	4.41918e+08	4.40463e+08	4.40575e+08	4.67893e+08	3.98463e+08	414828869	6.34263e+08	4.55067e+08	4.99597e+08	5.11824e+08	4.22125e+08	4.11852e+08	3.99081e+08
P04785	Protein disulfide-isomerase OS=Rattus norvegicus OX=10116 GN=P4hb PE=1 SV=2	1.05647e+09	1.14777e+09	1.19373e+09	1.13557e+09	1.09025e+09	1.22053e+09	1.10459e+09	1.14141e+09	9.98567e+08	1.17286e+09	1.07917e+09	1.09856e+09	1.13614e+09	1.12332e+09	1.09252e+09
P21707	Synaptotagmin-1 OS=Rattus norvegicus OX=10116 GN=Syt1 PE=1 SV=3	2.61717e+09	2.71595e+09	2.53595e+09	2.29772e+09	1.90174e+09	2.4638e+09	2.77316e+09	2.45584e+09	3.60927e+09	2.88934e+09	2.74153e+09	2.34809e+09	2.5887e+09	2.48613e+09	2.42793e+09
P84092	AP-2 complex subunit mu OS=Rattus norvegicus OX=10116 GN=Ap2m1 PE=1 SV=1	2.84057e+09	2.96531e+09	2.93699e+09	2.75495e+09	2.72836e+09	2.67288e+09	2.8337e+09	2.69983e+09	3.09691e+09	2.97571e+09	2.76663e+09	2.68545e+09	2.97566e+09	2.70787e+09	2.87227e+09
Q63413	Spliceosome RNA helicase Ddx39b OS=Rattus norvegicus OX=10116 GN=Ddx39b PE=2 SV=3	8.14769e+08	8.53022e+08	8.63786e+08	7.85024e+08	8.1828e+08	7.97244e+08	8.19176e+08	8.04363e+08	7.80164e+08	9.28544e+08	8.33558e+08	8.18809e+08	8.12163e+08	7.56613e+08	8.12946e+08
Q5SGE0	Leucine-rich PPR motif-containing protein, mitochondrial OS=Rattus norvegicus OX=10116 GN=Lrpprc PE=1 SV=1	8.44494e+08	8.34835e+08	8.27388e+08	7.81688e+08	7.86913e+08	7.57363e+08	7.05142e+08	728206590	7.79526e+08	7.39606e+08	6.73727e+08	7.39487e+08	7.89181e+08	6.63703e+08	7.64545e+08
A0A0G2JW88	Microtubule-associated protein OS=Rattus norvegicus OX=10116 GN=Map4 PE=1 SV=1	9.8468e+06	8.75154e+06	4.98514e+06	1.19546e+07	1.40051e+07	3.47507e+07	7.5187e+06	7.70725e+06	1.60945e+07	1.53127e+07	3.05175e+06	3.37366e+06	6.391e+06	4.5842e+06	7.77899e+06
Q05175	Brain acid soluble protein 1 OS=Rattus norvegicus OX=10116 GN=Basp1 PE=1 SV=2	8.95224e+08	9.29981e+08	8.28012e+08	9.10682e+08	8.05472e+08	7.55286e+08	8.87712e+08	9.09715e+08	8.68774e+08	7.86938e+08	8.01266e+08	8.03816e+08	8.95225e+08	8.4854e+08	9.03135e+08
F1LN88	Aldehyde dehydrogenase, mitochondrial OS=Rattus norvegicus OX=10116 GN=Aldh2 PE=1 SV=2	1.04425e+09	1.11854e+09	1.11784e+09	1.11193e+09	1.22931e+09	1.1689e+09	1.01142e+09	1.26775e+09	9.98931e+08	1.13497e+09	9.3212e+08	1.08661e+09	1.02339e+09	1.19294e+09	1.2739e+09
Q9ERB4	Versican core protein (Fragments) OS=Rattus norvegicus OX=10116 GN=Vcan PE=2 SV=2	1.70543e+08	1.96933e+08	2.00802e+08	2.09291e+08	1.76514e+08	1.84562e+08	1.74391e+08	189824404	1.62168e+08	7.94234e+07	1.47389e+08	1.87655e+08	1.92723e+08	1.88785e+08	1.73486e+08
P35213	14-3-3 protein beta/alpha OS=Rattus norvegicus OX=10116 GN=Ywhab PE=1 SV=3	2.15367e+09	2.04358e+09	1.96387e+09	2.49026e+09	2.68631e+09	2.2286e+09	2.05246e+09	1.85707e+09	2.31439e+09	2.77138e+09	2.69456e+09	2.51072e+09	2.32319e+09	2.28529e+09	2.05632e+09
B3GNI6	Septin-11 OS=Rattus norvegicus OX=10116 GN=Sept11 PE=1 SV=1	8.89373e+08	8.82429e+08	9.28308e+08	8.35752e+08	7.69063e+08	7.37403e+08	8.60534e+08	8.43657e+08	9.81534e+08	6.94116e+08	6.24835e+08	6.49106e+08	8.67995e+08	8.26546e+08	8.78423e+08
F1M3D3	Heterogeneous nuclear ribonucleoprotein M OS=Rattus norvegicus OX=10116 GN=Hnrnpm PE=1 SV=1	6.8863e+08	7.36652e+08	7.45186e+08	7.1029e+08	7.20582e+08	7.48148e+08	6.92031e+08	6.9677e+08	6.92878e+08	7.70868e+08	6.91126e+08	6.87879e+08	7.28927e+08	6.9429e+08	7.59117e+08
G3V7I5	Aldehyde dehydrogenase X, mitochondrial OS=Rattus norvegicus OX=10116 GN=Aldh1b1 PE=1 SV=1	5.78598e+08	5.76064e+08	5.85459e+08	5.32491e+08	5.65757e+08	5.72955e+08	5.53313e+08	5.6018e+08	5.86852e+08	5.96268e+08	5.82258e+08	5.71315e+08	6.10005e+08	5.51461e+08	5.8593e+08
A0A0G2JY26	DnaJ heat shock protein family (Hsp40) member C6 OS=Rattus norvegicus OX=10116 GN=Dnajc6 PE=1 SV=1	7.09443e+08	7.02015e+08	7.48162e+08	6.93922e+08	7.1454e+08	6.35536e+08	6.98202e+08	6.77463e+08	6.7515e+08	7.94192e+08	7.30415e+08	7.05845e+08	6.98819e+08	6.80254e+08	7.37761e+08
F1LM47	Succinate--CoA ligase [ADP-forming] subunit beta, mitochondrial OS=Rattus norvegicus OX=10116 GN=Sucla2 PE=1 SV=1	3.09988e+09	3.37803e+09	3.47115e+09	3.19139e+09	3.02952e+09	2.95825e+09	3.20856e+09	3.00888e+09	3.17721e+09	3.19964e+09	3.24925e+09	3.2918e+09	3.27793e+09	3.23033e+09	3.33017e+09
A0A0G2JZI2	Glutamyl-prolyl-tRNA synthetase OS=Rattus norvegicus OX=10116 GN=Eprs PE=1 SV=1	4.13748e+08	4.24718e+08	4.40904e+08	4.15687e+08	4.10294e+08	4.41423e+08	5.38094e+08	4.8129e+08	4.49807e+08	4.53368e+08	3.79264e+08	4.3407e+08	3.86463e+08	5.01299e+08	4.13619e+08
P62260	14-3-3 protein epsilon OS=Rattus norvegicus OX=10116 GN=Ywhae PE=1 SV=1	9.23895e+09	9.47853e+09	9.14756e+09	8.64778e+09	8.81876e+09	8.1715e+09	9.80118e+09	8717081216	9.22061e+09	1.0152e+10	9.08622e+09	8.84552e+09	9.5026e+09	9.37652e+09	9.86632e+09
P63319	Protein kinase C gamma type OS=Rattus norvegicus OX=10116 GN=Prkcg PE=1 SV=1	5.26743e+08	5.44792e+08	5.82793e+08	5.48726e+08	5.12421e+08	4.81857e+08	5.26191e+08	4.95911e+08	6.89864e+08	4.67701e+08	5.60999e+08	5.02458e+08	5.86376e+08	5.07469e+08	5.96036e+08
P17764	Acetyl-CoA acetyltransferase, mitochondrial OS=Rattus norvegicus OX=10116 GN=Acat1 PE=1 SV=1	7.72399e+08	7.38289e+08	7.80813e+08	7.24793e+08	1.29168e+09	7.23242e+08	6.989e+08	7.95508e+08	8.44237e+08	5.63503e+08	6.65864e+08	6.16145e+08	7.37703e+08	7.10269e+08	8.21641e+08
Q05962	ADP/ATP translocase 1 OS=Rattus norvegicus OX=10116 GN=Slc25a4 PE=1 SV=3	5.24345e+09	5.45833e+09	5.24013e+09	4.6172e+09	4.89592e+09	4.92953e+09	5.34455e+09	5.10227e+09	5.49032e+09	5.22943e+09	5.19969e+09	5.42737e+09	5.29297e+09	5.13994e+09	5.19701e+09
P41565	Isocitrate dehydrogenase [NAD] subunit gamma 1, mitochondrial OS=Rattus norvegicus OX=10116 GN=Idh3g PE=1 SV=2	3.06746e+06	4.4123e+06	2.16164e+07		3.22703e+07	4.25645e+06	2.39621e+07	3.52108e+06	2.51636e+06	2.54677e+07	5.38264e+06	1.63046e+07	1.46405e+06	1.97433e+07	2.25892e+07
P31044	Phosphatidylethanolamine-binding protein 1 OS=Rattus norvegicus OX=10116 GN=Pebp1 PE=1 SV=3	3.99935e+09	4.09813e+09	3.8519e+09	3.52521e+09	3.80753e+09	4.21788e+09	3.54209e+09	3709234487	3.78665e+09	3.75419e+09	4.01039e+09	3.97317e+09	4.00581e+09	3.93993e+09	3.92584e+09
D4A9D6	DEAH (Asp-Glu-Ala-His) box polypeptide 9 (Predicted) OS=Rattus norvegicus OX=10116 GN=Dhx9 PE=1 SV=1	4.26593e+08	4.29339e+08	4.13496e+08	4.10966e+08	3.67234e+08	3.91995e+08	3.94499e+08	4.13057e+08	4.07141e+08	4.25944e+08	3.0325e+08	3.11944e+08	3.94473e+08	3.88955e+08	4.17316e+08
P18088	Glutamate decarboxylase 1 OS=Rattus norvegicus OX=10116 GN=Gad1 PE=2 SV=1	7.6604e+08	7.51384e+08	7.79793e+08	7.22676e+08	7.45648e+08	6.79175e+08	7.73407e+08	7.16469e+08	7.25317e+08	7.34e+08	7.43803e+08	6.26511e+08	7.57648e+08	7.30558e+08	8.37951e+08
Q6PST4	Atlastin-1 OS=Rattus norvegicus OX=10116 GN=Atl1 PE=1 SV=1	6.0342e+08	6.74551e+08	6.00178e+08	6.51995e+08	7.09703e+08	6.08248e+08	5.88256e+08	590601638	5.6135e+08	7.50746e+08	7.05353e+08	6.40294e+08	6.72341e+08	6.92039e+08	6.86649e+08
P63102	14-3-3 protein zeta/delta OS=Rattus norvegicus OX=10116 GN=Ywhaz PE=1 SV=1	1.11009e+10	1.13967e+10	1.06758e+10	1.15594e+10	1.16488e+10	1.16685e+10	1.07222e+10	9.76524e+09	1.33204e+10	1.25658e+10	1.22083e+10	1.16866e+10	1.13475e+10	1.02584e+10	1.06348e+10
Q5FVI6	V-type proton ATPase subunit C 1 OS=Rattus norvegicus OX=10116 GN=Atp6v1c1 PE=2 SV=1	1.27332e+09	1.34834e+09	1.34674e+09	1.31743e+09	1.32984e+09	1.07207e+09	1.27365e+09	1.17395e+09	1.29444e+09	1.4071e+09	1.33881e+09	1.3225e+09	1.366e+09	1.28977e+09	1.36663e+09
G3V936	Citrate synthase OS=Rattus norvegicus OX=10116 GN=Cs PE=1 SV=1	6.55585e+09	6.99872e+09	6.73109e+09	6.36411e+09	6.45028e+09	6.72372e+09	6.59776e+09	5995624810	6.83449e+09	6.51936e+09	7.12217e+09	6.48103e+09	6.73219e+09	6.28091e+09	6.50101e+09
A0A0G2JTR4	ABR, RhoGEF and GTPase-activating protein OS=Rattus norvegicus OX=10116 GN=Abr PE=1 SV=1	5.52173e+08	5.57637e+08	3.68895e+08	5.33157e+08	5.41358e+08	5.06599e+08	3.42809e+08	3.51873e+08	3.50196e+08	4.47541e+08	3.86937e+08	3.66715e+08	3.76218e+08	3.41438e+08	5.76849e+08
Q9Z2S9	Flotillin-2 OS=Rattus norvegicus OX=10116 GN=Flot2 PE=1 SV=1	1.25512e+09	1.3243e+09	1.31961e+09	1.26338e+09	1.30061e+09	1.17373e+09	1.33399e+09	1.23856e+09	1.22078e+09	4.377e+08	3.73531e+08	3.49989e+08	1.29938e+09	1.27444e+09	1.30336e+09
Q99PD4	Actin-related protein 2/3 complex subunit 1A OS=Rattus norvegicus OX=10116 GN=Arpc1a PE=2 SV=1	8.80036e+08	9.00021e+08	9.3223e+08	8.17299e+08	7.85044e+08	7.76593e+08	8.79489e+08	8.37986e+08	9.86937e+08	8.30079e+08	7.89253e+08	7.73501e+08	8.33543e+08	8.5979e+08	9.21602e+08
Q62703	Reticulocalbin-2 OS=Rattus norvegicus OX=10116 GN=Rcn2 PE=1 SV=2	5.95217e+08	6.34372e+08	6.13567e+08	5.77136e+08	5.69611e+08	5.43007e+08	5.59563e+08	5.75362e+08	4.37563e+08	7.22746e+08	6.28757e+08	6.04551e+08	5.9666e+08	5.84049e+08	5.85455e+08
Q5BK63	NADH dehydrogenase [ubiquinone] 1 alpha subcomplex subunit 9, mitochondrial OS=Rattus norvegicus OX=10116 GN=Ndufa9 PE=1 SV=2	1.53898e+09	1.63943e+09	1.55501e+09	1.48502e+09	1.55629e+09	1.46695e+09	1.41593e+09	1.43708e+09	1.5944e+09	1.53992e+09	1.5949e+09	1.50256e+09	1.65367e+09	1.49034e+09	1.58296e+09
P07936	Neuromodulin OS=Rattus norvegicus OX=10116 GN=Gap43 PE=1 SV=1	4.27773e+09	3.95657e+09	4.19248e+09	4.13709e+09	3.83762e+09	3.9626e+09	3.93518e+09	3.78944e+09	3.60906e+09	4.39247e+09	4.27931e+09	4.02829e+09	3.86445e+09	3.76113e+09	4.06706e+09
P08461	Dihydrolipoyllysine-residue acetyltransferase component of pyruvate dehydrogenase complex, mitochondrial OS=Rattus norvegicus OX=10116 GN=Dlat PE=1 SV=3	1.77018e+09	1.80966e+09	1.71873e+09	1.94307e+09	2.21846e+09	1.84937e+09	1.85248e+09	1.84842e+09	3.58283e+09	1.8335e+09	2.10421e+09	1.62509e+09	1.77847e+09	1.60935e+09	1.75808e+09
G3V7G8	Glycine--tRNA ligase OS=Rattus norvegicus OX=10116 GN=Gars PE=1 SV=1	5.01018e+08	5.39673e+08	5.48793e+08	6.06854e+08	5.64189e+08	5.20702e+08	5.31527e+08	5.48392e+08	5.1194e+08	4.90542e+08	4.73441e+08	5.28157e+08	5.64696e+08	5.61781e+08	5.5556e+08
D3ZWL6	Adenosylhomocysteinase OS=Rattus norvegicus OX=10116 GN=Ahcyl2 PE=1 SV=3	1.71198e+08	1.77523e+08	1.67645e+08	1.6897e+08	1.60652e+08	1.06532e+08	1.52294e+08	1.62918e+08	1.24551e+08	1.64259e+08	1.56773e+08	1.73163e+08	1.60164e+08	1.58945e+08	1.62993e+08
G3V9Z3	Amine oxidase OS=Rattus norvegicus OX=10116 GN=Maoa PE=1 SV=1	1.28214e+09	1.38722e+09	1.43683e+09	1.31991e+09	1.2987e+09	1.16677e+09	1.27247e+09	1.26866e+09	1.14254e+09	1.40622e+09	1.32791e+09	1.45342e+09	1.38579e+09	1.40763e+09	1.47623e+09
A0A0G2K1C0	Actin-related protein 3 OS=Rattus norvegicus OX=10116 GN=Actr3 PE=1 SV=1	7.96481e+08	8.2692e+08	8.33448e+08	7.34297e+08	8.08144e+08	7.42661e+08	8.16854e+08	7.93446e+08	7.90415e+08	8.93e+08	8.18643e+08	7.45224e+08	8.1401e+08	8.36936e+08	7.94204e+08
Q9Z0W5	Protein kinase C and casein kinase substrate in neurons protein 1 OS=Rattus norvegicus OX=10116 GN=Pacsin1 PE=1 SV=1	1.88152e+09	1.84961e+09	1.89624e+09	1.98429e+09	2.0685e+09	2.11985e+09	1.78837e+09	1730857843	2.26899e+09	1.99635e+09	2.14975e+09	1.9936e+09	2.01633e+09	1.77718e+09	1.84879e+09
F1LNF7	Isocitrate dehydrogenase [NAD] subunit, mitochondrial OS=Rattus norvegicus OX=10116 GN=Idh3a PE=1 SV=2	2.68659e+09	2.58157e+09	2.62136e+09	2.48081e+09	2.5812e+09	3.09602e+09	2.63911e+09	2.38937e+09	2.84329e+09	2.62337e+09	2.77723e+09	2.50278e+09	2.6629e+09	2.31549e+09	2.563e+09
Q6P7D2	Arginyl aminopeptidase (Aminopeptidase B) OS=Rattus norvegicus OX=10116 GN=Rnpep PE=2 SV=1	1.36604e+07	1.50354e+07	1.27931e+07	9.89325e+06	1.43826e+07	1.09492e+07	1.39568e+07	10393826	1.6767e+07		2.12925e+06	2.43049e+06	1.47829e+07	1.2135e+07	1.52027e+07
G3V7G0	Cytoplasmic dynein 1 light intermediate chain 1 OS=Rattus norvegicus OX=10116 GN=Dync1li1 PE=1 SV=1	4.17275e+08	4.22998e+08	4.48084e+08	4.36124e+08	4.28284e+08	3.99646e+08	4.17818e+08	4.24345e+08	3.91398e+08	4.42372e+08	4.01903e+08	4.44566e+08	4.37162e+08	4.26736e+08	4.37506e+08
A0A0U1RRT8	Septin 6 OS=Rattus norvegicus OX=10116 GN=Sept6 PE=1 SV=1	5.91749e+08	6.01051e+08	6.6102e+08	5.92996e+08	5.9872e+08	5.15783e+08	5.09912e+08	5.7678e+08	6.4625e+08	4.99311e+08	4.59602e+08	4.48203e+08	6.37048e+08	5.95419e+08	6.16166e+08
P85515	Alpha-centractin OS=Rattus norvegicus OX=10116 GN=Actr1a PE=1 SV=1	2.43684e+08	2.55297e+08	2.66581e+08	2.41173e+08	2.36385e+08	2.40248e+08	1.77537e+08	208892565	2.22096e+08	3.01192e+08	2.66402e+08	2.26647e+08	2.47348e+08	2.04606e+08	2.60942e+08
P56571	ES1 protein homolog, mitochondrial OS=Rattus norvegicus OX=10116 PE=1 SV=2	1.33047e+09	1.38038e+09	1.3914e+09	1.24208e+09	1.2842e+09	1.19963e+09	1.36518e+09	1.30798e+09	1.40453e+09	1.24702e+09	1.22748e+09	1.26208e+09	1.31892e+09	1.3114e+09	1.29741e+09
P97846	Contactin-associated protein 1 OS=Rattus norvegicus OX=10116 GN=Cntnap1 PE=1 SV=1	8.05147e+08	8.64464e+08	7.60298e+08	7.55334e+08	8.68784e+08	7.9391e+08	7.55955e+08	7.59194e+08	8.10585e+08	7.69706e+08	6.91155e+08	7.08791e+08	8.03253e+08	7.19013e+08	8.70458e+08
A0A0G2JTW9	Beta-globin OS=Rattus norvegicus OX=10116 GN=Hbb-b1 PE=1 SV=1	2.98785e+08	1.24212e+08	1.43394e+08	1.77132e+08	1.68646e+08	2.4492e+08	2.35648e+08	260013265	1.67417e+08	1.55661e+08	2.12542e+08	1.34079e+08	1.71574e+08	2.34155e+08	1.48002e+08
A0A0G2K1R5	CaM kinase-like vesicle-associated protein OS=Rattus norvegicus OX=10116 GN=Camkv PE=1 SV=1	8.5874e+08	9.21204e+08	9.56049e+08	8.40796e+08	8.11553e+08	7.59866e+08	8.55924e+08	7.95858e+08	1.14563e+09	9.41765e+08	8.59623e+08	7.96158e+08	9.04022e+08	8.9512e+08	9.14103e+08
G3V6V1	Aminopeptidase B OS=Rattus norvegicus OX=10116 GN=Rnpep PE=1 SV=1	769663		852277	702147	472426		911952			2.15783e+07	1.96273e+07	1.95314e+07
P62138	Serine/threonine-protein phosphatase PP1-alpha catalytic subunit OS=Rattus norvegicus OX=10116 GN=Ppp1ca PE=1 SV=1	1.06546e+08	1.05083e+08	1.11762e+08	9.81647e+07	1.30977e+08	1.55904e+08	1.14455e+08	9.77705e+07	1.35185e+08	1.53193e+08	1.45412e+08	1.41387e+08	9.86274e+07	1.02035e+08	1.07927e+08
Q499R7	Ppa1 protein (Fragment) OS=Rattus norvegicus OX=10116 GN=Ppa1 PE=2 SV=1	5.53561e+08	5.60233e+08	5.3007e+08	5.2559e+08	5.78506e+08	5.0346e+08	5.79524e+08	5.05107e+08	5.7512e+08	5.97792e+08	5.39143e+08	5.88064e+08	5.18439e+08	5.34506e+08	5.60113e+08
A0A140TAA1	Immunoglobulin superfamily, member 8 OS=Rattus norvegicus OX=10116 GN=Igsf8 PE=1 SV=1	6.63765e+08	6.90407e+08	6.07622e+08	7.32289e+08	7.48155e+08	7.07671e+08	6.8125e+08	649425876	7.17241e+08	6.60428e+08	7.16304e+08	7.22134e+08	6.79485e+08	6.36036e+08	6.18987e+08
Q5D059	Heterogeneous nuclear ribonucleoprotein K OS=Rattus norvegicus OX=10116 GN=Hnrnpk PE=1 SV=1	1.56845e+09	1.56182e+09	1.51992e+09	1.49251e+09	1.61857e+09	1.55545e+09	1.63468e+09	1393321398	2.17511e+09	1.56519e+09	1.61214e+09	1.56406e+09	1.45771e+09	1.41802e+09	1.58164e+09
P60892	Ribose-phosphate pyrophosphokinase 1 OS=Rattus norvegicus OX=10116 GN=Prps1 PE=1 SV=2	5.49675e+08	4.80459e+08	4.82198e+08	5.36035e+08	5.73279e+08	4.91453e+08	4.95616e+08	4.28983e+08	4.85336e+08	6.20393e+08	5.29183e+08	5.03879e+08	5.03354e+08	4.8386e+08	4.71444e+08
A0A0G2K3Z9	Uncharacterized protein OS=Rattus norvegicus OX=10116 PE=4 SV=1	3.78332e+09	3.89538e+09	4.10909e+09	4.10188e+09	3.78032e+09	3.66682e+09	3.71772e+09	3940779399	3.17886e+09	4.16447e+09	3.64913e+09	4.37227e+09	3.90089e+09	3.93331e+09	4.05366e+09
P11730	Calcium/calmodulin-dependent protein kinase type II subunit gamma OS=Rattus norvegicus OX=10116 GN=Camk2g PE=1 SV=1	3.135e+08	3.21686e+08	3.24213e+08	2.81102e+08	3.03489e+08	3.31571e+08	3.768e+08	3.62552e+08	3.60851e+08	3.11257e+08	3.84512e+08	3.62109e+08	3.43158e+08	3.86193e+08	3.21884e+08
A0A140UHX6	Spectrin beta chain OS=Rattus norvegicus OX=10116 GN=Sptb PE=1 SV=1	1.32405e+08	1.50757e+08	1.749e+08	1.30689e+08	1.34719e+08	1.22237e+08	1.28968e+08	1.46079e+08	1.65417e+08	1.34885e+08	1.20886e+08	1.15836e+08	1.36654e+08	1.47397e+08	9.69471e+07
F1LPV0	Asparaginyl-tRNA synthetase OS=Rattus norvegicus OX=10116 GN=Nars PE=1 SV=2	8.30442e+08	8.23679e+08	8.36611e+08	7.99426e+08	7.99551e+08	7.73682e+08	8.03694e+08	7.81297e+08	6.9799e+08	9.35025e+08	8.73804e+08	8.1746e+08	8.14891e+08	8.08249e+08	8.2789e+08
Q9ER24	Ataxin-10 OS=Rattus norvegicus OX=10116 GN=Atxn10 PE=1 SV=1	6.33805e+08	5.94831e+08	6.55178e+08	5.39797e+08	5.88701e+08	5.8211e+08	6.45324e+08	5.27128e+08	4.44067e+08	7.82597e+08	6.45308e+08	5.67222e+08	6.51711e+08	5.74216e+08	6.4649e+08
P07171	Calbindin OS=Rattus norvegicus OX=10116 GN=Calb1 PE=1 SV=2	1.63336e+09	1.59789e+09	1.74409e+09	1.45114e+09	1.34201e+09	1.36677e+09	1.52525e+09	1454584661	1.13913e+09	1.76868e+09	1.4336e+09	1.5388e+09	1.56783e+09	1.60469e+09	1.59596e+09
P62142	Serine/threonine-protein phosphatase PP1-beta catalytic subunit OS=Rattus norvegicus OX=10116 GN=Ppp1cb PE=1 SV=3	2.08293e+08	2.00728e+08	2.13237e+08	2.04401e+08	2.14832e+08	2.04677e+08	1.99386e+08	2.0837e+08	2.09544e+08	2.06511e+08	2.00709e+08	1.97002e+08	2.06735e+08	2.05476e+08	2.20002e+08
P32851	Syntaxin-1A OS=Rattus norvegicus OX=10116 GN=Stx1a PE=1 SV=1	7.813e+08	7.75416e+08	8.11262e+08	7.52319e+08	8.05663e+08	7.7069e+08	7.86745e+08	7.29967e+08	1.08774e+09	8.49081e+08	8.02792e+08	7.79948e+08	8.38712e+08	7.55736e+08	9.38426e+08
G3V6S5	C-1-tetrahydrofolate synthase, cytoplasmic OS=Rattus norvegicus OX=10116 GN=Mthfd1 PE=1 SV=1	5.26427e+08	4.98056e+08	4.92982e+08	5.02384e+08	5.06678e+08	4.2069e+08	5.39403e+08	5.29184e+08	4.42094e+08	4.68631e+08	4.41548e+08	5.6299e+08	4.59015e+08	5.50731e+08	5.3085e+08
Q0GLB6	DPPY splice variant c OS=Rattus norvegicus OX=10116 GN=Dpp10 PE=2 SV=1	7.99801e+08	9.02846e+08	9.08411e+08	8.90105e+08	8.71913e+08	7.10795e+08	8.80177e+08	850030147	9.11449e+08	8.97457e+08	7.64605e+08	8.38316e+08	8.4844e+08	8.55502e+08	9.18113e+08
Q5M7W5	Microtubule-associated protein 4 OS=Rattus norvegicus OX=10116 GN=Map4 PE=1 SV=1	8.59399e+06	1.19139e+07	1.39788e+07	9.26075e+06	7.65129e+06	1.11598e+07	7.1736e+06	11216748	1.70553e+07	7.92452e+06	2.06657e+06	3.00914e+06	6.16018e+06	8.48856e+06	9.85834e+06
F1LP80	Neurosecretory protein VGF OS=Rattus norvegicus OX=10116 GN=Vgf PE=4 SV=2	4.60909e+08	4.28264e+08	4.73783e+08	4.62556e+08	4.73248e+08	4.33244e+08	4.46338e+08	4.38314e+08	4.25944e+08	4.80993e+08	4.45511e+08	3.3469e+08	4.24683e+08	4.30312e+08	4.44482e+08
Q02356	AMP deaminase 2 OS=Rattus norvegicus OX=10116 GN=Ampd2 PE=1 SV=2	6.28546e+08	6.09123e+08	6.58507e+08	5.85512e+08	6.51224e+08	6.25743e+08	6.09681e+08	5.90242e+08	5.01305e+08	7.18184e+08	6.64205e+08	5.76552e+08	6.30169e+08	6.09963e+08	6.35842e+08
Q6AXV4	Sorting and assembly machinery component 50 homolog OS=Rattus norvegicus OX=10116 GN=Samm50 PE=1 SV=1	6.29192e+08	6.77949e+08	6.76556e+08	6.37711e+08	6.51444e+08	6.47399e+08	6.12857e+08	668952800	6.74015e+08	6.37488e+08	6.32751e+08	6.0749e+08	6.71098e+08	5.88597e+08	6.3604e+08
B0BMW2	3-hydroxyacyl-CoA dehydrogenase type-2 OS=Rattus norvegicus OX=10116 GN=Hsd17b10 PE=1 SV=1	7.00518e+08	7.31356e+08	7.59372e+08	7.15104e+08	6.87471e+08	7.09377e+08	7.00236e+08	7.37848e+08	6.94557e+08	7.29314e+08	6.76525e+08	7.31019e+08	7.0861e+08	7.47244e+08	7.64171e+08
D3ZCV0	Actinin alpha 2 OS=Rattus norvegicus OX=10116 GN=Actn2 PE=1 SV=1	1.20056e+07	1.3583e+07	1.28236e+07	1.1167e+07	1.50909e+07	2.9359e+06	1.38407e+07	10800517	3.83929e+07	1.42461e+07	1.44342e+07	8.66694e+06	7.54537e+06	2.21233e+06	1.13142e+07
G3V9D7	Adducin 3 (Gamma), isoform CRA_a OS=Rattus norvegicus OX=10116 GN=Add3 PE=1 SV=1	1.5132e+07	2.2869e+07	1.89396e+07	1.43893e+07	1.67826e+07	1.52954e+07	1.47512e+07	22183400	1.51896e+07	2.95638e+07	1.72824e+07	1.966e+07	2.32197e+07	1.50867e+07	1.40352e+07
Q01728	Sodium/calcium exchanger 1 OS=Rattus norvegicus OX=10116 GN=Slc8a1 PE=1 SV=3	3.29335e+08	3.12481e+08	3.01829e+08	3.50825e+08	3.66813e+08	3.32568e+08	3.32278e+08	2.72512e+08	2.66401e+08	4.9032e+08	4.23544e+08	3.99907e+08	3.23694e+08	2.98545e+08	2.89222e+08
Q63475	Receptor-type tyrosine-protein phosphatase N2 OS=Rattus norvegicus OX=10116 GN=Ptprn2 PE=1 SV=1	4.15845e+08	4.03196e+08	3.8386e+08	3.33963e+08	3.68129e+08	2.8931e+08	3.27902e+08	3.43476e+08	3.31156e+08	4.37555e+08	3.64631e+08	3.37538e+08	3.53276e+08	3.61245e+08	3.87198e+08
B0BMW0	RAB14, member RAS oncogene family OS=Rattus norvegicus OX=10116 GN=Rab14 PE=1 SV=1	8.81103e+08	9.1561e+08	8.4413e+08	8.83313e+08	8.97359e+08	8.27535e+08	7.55215e+08	836267215	8.68029e+08	1.14602e+09	9.94877e+08	9.05496e+08	9.43309e+08	9.07069e+08	9.23541e+08
D4A8H8	Cytoplasmic FMR1-interacting protein OS=Rattus norvegicus OX=10116 GN=Cyfip1 PE=1 SV=1	2.31565e+08	2.63438e+08	2.39382e+08	2.30203e+08	2.54932e+08	2.1317e+08	2.55865e+08	2.29889e+08	2.78366e+08	2.84985e+08	2.55166e+08	2.47545e+08	2.22835e+08	2.22112e+08	2.2541e+08
D3ZUT8	Protein NDRG4 OS=Rattus norvegicus OX=10116 GN=Ndrg4 PE=1 SV=1	1.84274e+07	1.18052e+07	4.44219e+07	2.33631e+07	2.57362e+07	3.89736e+07	7.05766e+07	20247896	2.09785e+07	7.14641e+07	2.43591e+07	4.48883e+07	2.15367e+07	1.76866e+07	8.99786e+07
P41542	General vesicular transport factor p115 OS=Rattus norvegicus OX=10116 GN=Uso1 PE=1 SV=1	5.66628e+08	5.35924e+08	5.5223e+08	5.94786e+08	5.1868e+08	5.7181e+08	4.91741e+08	5.55255e+08	4.45785e+08	6.05209e+08	4.41321e+08	5.07403e+08	5.65572e+08	5.27245e+08	5.37833e+08
Q80U96	Exportin-1 OS=Rattus norvegicus OX=10116 GN=Xpo1 PE=1 SV=1	5.01925e+08	4.98516e+08	5.41329e+08	5.01934e+08	4.33535e+08	4.15234e+08	5.01981e+08	4.88853e+08	4.22738e+08	5.1615e+08	4.65285e+08	5.01302e+08	4.89609e+08	5.24512e+08	5.56926e+08
G3V728	4-nitrophenylphosphatase domain and non-neuronal SNAP25-like protein homolog 1 (C. elegans), isoform CRA_b OS=Rattus norvegicus OX=10116 GN=Nipsnap1 PE=1 SV=1	1.29993e+09	1.40361e+09	1.39433e+09	1.29652e+09	1.30672e+09	1.21648e+09	1.30115e+09	1.25288e+09	1.30466e+09	1.42587e+09	1.38995e+09	1.33695e+09	1.37908e+09	1.28966e+09	1.353e+09
F1LMY3	Receptor-type tyrosine-protein phosphatase zeta OS=Rattus norvegicus OX=10116 GN=Ptprz1 PE=1 SV=3	1.12618e+09	1.28449e+09	1.17855e+09	1.1422e+09	1.08679e+09	1.15698e+09	1.06124e+09	1.01528e+09	1.10949e+09	1.16944e+09	1.20177e+09	1.25712e+09	1.17373e+09	1.07598e+09	1.10773e+09
D3ZCH7	Adducin 3 (Gamma), isoform CRA_b OS=Rattus norvegicus OX=10116 GN=Add3 PE=1 SV=2
A0A0G2JYA4	Serine/threonine-protein phosphatase OS=Rattus norvegicus OX=10116 GN=LOC100362453 PE=3 SV=1	6.31419e+07	6.52445e+07	5.60063e+07	5.77711e+07	6.3276e+07	6.1048e+07	5.88823e+07	67888204	6.98658e+07	7.47175e+07	6.21151e+07	6.77447e+07	6.66356e+07	6.98813e+07	5.99345e+07
Q91Y81	Septin-2 OS=Rattus norvegicus OX=10116 GN=Sept2 PE=1 SV=1	3.51286e+08	3.68887e+08	3.32449e+08	4.02144e+08	3.86238e+08	4.79213e+08	3.7169e+08	4.21275e+08	3.69021e+08	4.6861e+08	4.35106e+08	6.18732e+08	3.52889e+08	3.38544e+08	3.01838e+08
Q09073	ADP/ATP translocase 2 OS=Rattus norvegicus OX=10116 GN=Slc25a5 PE=1 SV=3	3.57985e+09	3.76753e+09	3.88409e+09	3.49343e+09	3.23734e+09	3.21817e+09	3.59092e+09	3536756143	4.03741e+09	3.34018e+09	3.43845e+09	3.7951e+09	3.69596e+09	3.58888e+09	3.65403e+09
G3V8T4	DNA damage-binding protein 1 OS=Rattus norvegicus OX=10116 GN=Ddb1 PE=1 SV=1	4.74708e+08	4.51703e+08	4.08221e+08	3.97966e+08	4.11579e+08	3.8236e+08	3.52203e+08	4.24018e+08	3.97195e+08	4.64368e+08	3.95563e+08	3.95831e+08	4.01247e+08	4.03286e+08	3.99628e+08
G3V7X5	SPARC-like 1 (Mast9, hevin), isoform CRA_a OS=Rattus norvegicus OX=10116 GN=Sparcl1 PE=1 SV=1	2.03212e+08	2.12743e+08	2.20235e+08	2.09825e+08	2.28292e+08	2.31135e+08	1.9149e+08	2.08945e+08	1.62453e+08	2.43838e+08	2.55219e+08	2.46216e+08	2.09893e+08	2.02639e+08	2.04167e+08
P21708	Mitogen-activated protein kinase 3 OS=Rattus norvegicus OX=10116 GN=Mapk3 PE=1 SV=5	2.98166e+08	2.96079e+08	2.94875e+08	3.05706e+08	2.86475e+08	2.90002e+08	2.95153e+08	2.87908e+08	2.70094e+08	3.24601e+08	2.75097e+08	3.13968e+08	3.02012e+08	2.96236e+08	2.97938e+08
A0A0G2JT63	Cytoplasmic FMR1-interacting protein 2 OS=Rattus norvegicus OX=10116 GN=Cyfip2 PE=4 SV=1	4.26581e+08	4.45387e+08	4.78916e+08	4.21672e+08	3.9255e+08	2.78534e+08	4.08108e+08	414451372	5.17601e+08	4.14607e+08	3.88474e+08	4.13138e+08	4.547e+08	4.06917e+08	4.28486e+08
P08753	Guanine nucleotide-binding protein G(k) subunit alpha OS=Rattus norvegicus OX=10116 GN=Gnai3 PE=1 SV=3	1.28532e+08	1.63839e+08	1.57759e+08	1.4285e+08	1.30933e+08	1.43074e+08	1.52072e+08	1.59687e+08	1.31719e+08	1.32058e+08	1.09296e+08	1.45294e+08	1.28947e+08	1.3314e+08	1.54957e+08
A0A0G2KAM4	Fascin OS=Rattus norvegicus OX=10116 GN=Fscn1 PE=3 SV=1	1.21043e+08	1.18021e+08	1.14134e+08	9.9752e+07	9.12289e+07	1.21048e+08	1.10917e+08	116799476	1.39736e+08	7.56391e+07	9.78977e+07	9.71011e+07	9.58426e+07	9.22894e+07	1.06535e+08
P45592	Cofilin-1 OS=Rattus norvegicus OX=10116 GN=Cfl1 PE=1 SV=3	3.30237e+09	3.25178e+09	3.38011e+09	2.73596e+09	3.27831e+09	3.09227e+09	3.61054e+09	3468258279	4.09451e+09	3.09696e+09	3.11311e+09	2.98773e+09	3.16906e+09	2.8149e+09	2.97788e+09
O08651	D-3-phosphoglycerate dehydrogenase OS=Rattus norvegicus OX=10116 GN=Phgdh PE=1 SV=3	1.1454e+09	1.19669e+09	1.11283e+09	1.53106e+09	1.14849e+09	1.33328e+09	1.0526e+09	1.03429e+09	8.82262e+08	1.42492e+09	1.31235e+09	1.25546e+09	1.27503e+09	1.18286e+09	1.16471e+09
Q6RJR6	Reticulon-3 OS=Rattus norvegicus OX=10116 GN=Rtn3 PE=1 SV=1	4.14457e+08	3.90476e+08	4.27555e+08	4.60886e+08	4.20518e+08	4.0409e+08	3.2054e+08	398048323	4.68491e+08	4.272e+08	4.6377e+08	4.36651e+08	4.10307e+08	3.85975e+08	3.89642e+08
P22062	Protein-L-isoaspartate(D-aspartate) O-methyltransferase OS=Rattus norvegicus OX=10116 GN=Pcmt1 PE=1 SV=2	1.0923e+09	1.00401e+09	9.9577e+08	1.1579e+09	1.19256e+09	1.05005e+09	1.10406e+09	9.35723e+08	1.05478e+09	1.12218e+09	1.14028e+09	1.12473e+09	1.1037e+09	1.0025e+09	1.00809e+09
Q5XI73	Rho GDP-dissociation inhibitor 1 OS=Rattus norvegicus OX=10116 GN=Arhgdia PE=1 SV=1	1.90688e+09	1.97998e+09	2.02156e+09	1.93808e+09	1.9264e+09	1.89156e+09	1.89746e+09	1.91003e+09	1.91544e+09	2.11694e+09	1.94191e+09	2.00268e+09	1.97962e+09	1.92136e+09	1.97617e+09
P62959	Histidine triad nucleotide-binding protein 1 OS=Rattus norvegicus OX=10116 GN=Hint1 PE=1 SV=5	1.92841e+09	2.06228e+09	2.01927e+09	1.83976e+09	1.88481e+09	1.86661e+09	1.99771e+09	1.88683e+09	1.88067e+09	2.00729e+09	1.91671e+09	1.78157e+09	1.891e+09	1.87666e+09	1.82562e+09
Q9EPH8	Polyadenylate-binding protein 1 OS=Rattus norvegicus OX=10116 GN=Pabpc1 PE=1 SV=1	5.55344e+08	5.76735e+08	5.94142e+08	5.50428e+08	5.02116e+08	4.99722e+08	5.93379e+08	5.23175e+08	6.2337e+08	5.16726e+08	5.19509e+08	4.76404e+08	5.91853e+08	5.02205e+08	5.64665e+08
B0BND0	Ectonucleotide pyrophosphatase/phosphodiesterase family member 6 OS=Rattus norvegicus OX=10116 GN=Enpp6 PE=1 SV=1	3.74745e+08	4.16858e+08	3.93672e+08	5.24583e+08	4.43087e+08	5.49278e+08	4.24416e+08	444247124	4.32403e+08	3.96936e+08	4.99249e+08	7.21245e+08	3.83817e+08	4.43945e+08	3.84075e+08
F1M5N4	Malic enzyme OS=Rattus norvegicus OX=10116 GN=Me3 PE=3 SV=2	3.88944e+08	3.78172e+08	3.70634e+08	3.38037e+08	3.56702e+08	2.81258e+08	3.53353e+08	3.30181e+08	5.42116e+08	3.30651e+08	3.46418e+08	3.72482e+08	3.77269e+08	3.64654e+08	3.94e+08
Q63259	Receptor-type tyrosine-protein phosphatase-like N OS=Rattus norvegicus OX=10116 GN=Ptprn PE=1 SV=2	3.32713e+08	3.13048e+08	3.35612e+08	2.92864e+08	2.86998e+08	2.76648e+08	3.16735e+08	2.7483e+08	2.35274e+08	3.45802e+08	2.47866e+08	2.56449e+08	2.93596e+08	2.58423e+08	3.06893e+08
P07340	Sodium/potassium-transporting ATPase subunit beta-1 OS=Rattus norvegicus OX=10116 GN=Atp1b1 PE=1 SV=1	9.875e+09	1.04012e+10	1.06956e+10	1.07787e+10	1.0242e+10	1.07382e+10	1.03596e+10	9.93016e+09	1.05282e+10	9.80595e+09	1.0977e+10	1.1052e+10	1.09452e+10	9.72436e+09	1.03509e+10
F1LM28	Neurofibromin OS=Rattus norvegicus OX=10116 GN=Nf1 PE=1 SV=2	2.15183e+08	2.43982e+08	2.42934e+08	2.1849e+08	2.17709e+08	1.71841e+08	2.2409e+08	209577889	2.07989e+08	2.41993e+08	2.40142e+08	2.24446e+08	2.20319e+08	2.09844e+08	2.20219e+08
A2VCW8	Septin 7 OS=Rattus norvegicus OX=10116 GN=Sept7 PE=2 SV=1	1.4397e+09	1.4687e+09	1.53903e+09	1.33764e+09	1.37716e+09	1.42291e+09	1.45299e+09	1372123516	1.82428e+09	1.10632e+09	1.21868e+09	1.1358e+09	1.42668e+09	1.47443e+09	1.41614e+09
Q6AYZ4	Serine/threonine-protein phosphatase OS=Rattus norvegicus OX=10116 GN=Ppp1cc PE=2 SV=1	5.32476e+07	5.2255e+07	5.02566e+07	4.65849e+07	4.54299e+07	4.79696e+07	5.06865e+07	4.79581e+07	7.08118e+07	5.22318e+07	5.39575e+07	4.47532e+07	5.15672e+07	5.03067e+07	5.26259e+07
A0JN25	Microtubule-associated protein OS=Rattus norvegicus OX=10116 GN=Mapt PE=1 SV=1	8.02189e+07	8.1414e+07	5.08596e+07	3.47662e+07	8.5688e+07	3.9623e+07	2.85535e+07	4.89551e+07	1.93597e+08	6.01917e+07	2.06004e+07	1.38569e+07	6.87667e+07	6.78236e+07	8.91068e+07
Q63622	Disks large homolog 2 OS=Rattus norvegicus OX=10116 GN=Dlg2 PE=1 SV=1	2.62231e+08	2.74554e+08	2.57569e+08	2.61172e+08	2.50427e+08	2.50535e+08	2.78661e+08	2.77648e+08	3.32223e+08	2.73066e+08	2.33115e+08	2.2353e+08	2.30798e+08	2.48207e+08	2.25948e+08
A0A0G2JSH9	Peroxiredoxin-2 OS=Rattus norvegicus OX=10116 GN=Prdx2 PE=1 SV=1	3.35924e+09	3.38081e+09	3.42816e+09	3.11698e+09	3.27533e+09	3.40259e+09	3.36828e+09	3.42485e+09	3.14203e+09	3.45092e+09	3.43577e+09	3.47147e+09	3.32247e+09	3.32635e+09	3.17737e+09
P62716	Serine/threonine-protein phosphatase 2A catalytic subunit beta isoform OS=Rattus norvegicus OX=10116 GN=Ppp2cb PE=2 SV=1	2.42384e+07	2.19059e+07	2.15007e+07	2.01947e+07	2.15909e+07	2.17888e+07	2.23058e+07	23617380	1.98933e+07	1.85033e+07	2.09699e+07	2.2915e+07	2.0102e+07	2.10766e+07	2.02525e+07
P07722	Myelin-associated glycoprotein OS=Rattus norvegicus OX=10116 GN=Mag PE=1 SV=1	1.22851e+09	1.37075e+09	1.26252e+09	1.68313e+09	1.47279e+09	1.56493e+09	1.6482e+09	1.41714e+09	1.43448e+09	1.05522e+09	1.45403e+09	2.17313e+09	1.35115e+09	1.46718e+09	1.52351e+09
P85973	Purine nucleoside phosphorylase OS=Rattus norvegicus OX=10116 GN=Pnp PE=1 SV=1	1.07888e+09	1.11243e+09	1.11568e+09	1.05468e+09	1.04151e+09	1.09469e+09	9.87961e+08	1064437902	1.0531e+09	1.31805e+09	1.11802e+09	1.18579e+09	1.04856e+09	1.17617e+09	1.099e+09
P12369	cAMP-dependent protein kinase type II-beta regulatory subunit OS=Rattus norvegicus OX=10116 GN=Prkar2b PE=1 SV=3	3.68409e+08	3.97271e+08	3.71186e+08	3.29795e+08	3.60554e+08	3.5022e+08	4.16334e+08	394285652	7.48794e+08	4.33707e+08	3.78453e+08	4.08827e+08	3.97024e+08	3.88124e+08	3.79649e+08
P11348	Dihydropteridine reductase OS=Rattus norvegicus OX=10116 GN=Qdpr PE=1 SV=1	1.94776e+09	2.15046e+09	2.10531e+09	2.17052e+09	2.01212e+09	1.91429e+09	1.98377e+09	1965644925	1.85976e+09	2.33855e+09	2.69688e+09	3.03856e+09	2.07244e+09	2.00213e+09	1.96198e+09
D3Z8P5	Uncharacterized protein OS=Rattus norvegicus OX=10116 PE=1 SV=2	2.43463e+06	2.31298e+06	1.47887e+06	874284	2.08271e+06	1.09327e+06	2.80443e+06	1.12433e+06	3.05137e+06	2.8275e+06	2.80675e+06	2.13634e+06	1.43856e+06	1.03231e+06	1.47784e+06
D3Z9N6	Versican core protein OS=Rattus norvegicus OX=10116 GN=Vcan PE=4 SV=2	5.23491e+07	5.14118e+07	5.55319e+07	4.61906e+07	4.16629e+07	6.10824e+07	5.65362e+07	49024132	4.99447e+07	2.74056e+07	3.3918e+07	4.03605e+07	5.78592e+07	4.26039e+07	4.64886e+07
Q5U322	Carboxypeptidase E OS=Rattus norvegicus OX=10116 GN=Cpe PE=2 SV=1	7.06142e+08	6.51631e+08	1.16427e+09	1.16854e+09	6.37587e+08	6.08911e+08	6.45842e+08	5.83833e+08	5.89482e+08	8.90117e+08	7.59787e+08	7.57872e+08	7.01037e+08	6.42352e+08	7.19284e+08
P60881	Synaptosomal-associated protein 25 OS=Rattus norvegicus OX=10116 GN=Snap25 PE=1 SV=1	2.67788e+09	2.75089e+09	2.63975e+09	2.74719e+09	2.61013e+09	2.43297e+09	2.61261e+09	2.538e+09	2.8757e+09	2.48486e+09	2.50156e+09	2.58536e+09	2.89559e+09	2.52027e+09	2.60368e+09
A0A0G2K7P9	Neural cell adhesion molecule 2 OS=Rattus norvegicus OX=10116 GN=Ncam2 PE=1 SV=1	6.2579e+08	6.81207e+08	6.74113e+08	7.15254e+08	7.03306e+08	6.38821e+08	6.24861e+08	5.87253e+08	6.70714e+08	7.53586e+08	7.3005e+08	7.89752e+08	6.80614e+08	6.27933e+08	6.47902e+08
P05370	Glucose-6-phosphate 1-dehydrogenase OS=Rattus norvegicus OX=10116 GN=G6pdx PE=1 SV=3	3.89618e+08	4.52646e+08	4.25434e+08	4.38749e+08	4.34809e+08	4.82232e+08	4.19865e+08	4.13982e+08	4.00171e+08	4.63854e+08	4.26097e+08	4.73839e+08	4.21012e+08	4.40975e+08	4.39528e+08
Q02563	Synaptic vesicle glycoprotein 2A OS=Rattus norvegicus OX=10116 GN=Sv2a PE=1 SV=2	2.06258e+09	1.83094e+09	1.8229e+09	2.29158e+09	2.57914e+09	2.54464e+09	1.92447e+09	1.73922e+09	2.13081e+09	2.77767e+09	2.78165e+09	2.6935e+09	2.14551e+09	1.9244e+09	1.9258e+09
P67779	Prohibitin OS=Rattus norvegicus OX=10116 GN=Phb PE=1 SV=1	1.21532e+09	1.21662e+09	1.27091e+09	1.23859e+09	1.29919e+09	1.40511e+09	1.21686e+09	1.16125e+09	1.18562e+09	1.44223e+09	1.46837e+09	1.4005e+09	1.2719e+09	1.21106e+09	1.24593e+09
P10760	Adenosylhomocysteinase OS=Rattus norvegicus OX=10116 GN=Ahcy PE=1 SV=3	9.31044e+08	1.00387e+09	1.10035e+09	1.0441e+09	9.33223e+08	1.05977e+09	9.58692e+08	1.01327e+09	9.23495e+08	1.03741e+09	1.04109e+09	9.96302e+08	9.66259e+08	1.03156e+09	1.04799e+09
F1M949	Cytoskeleton-associated protein 5 OS=Rattus norvegicus OX=10116 GN=Ckap5 PE=1 SV=3	2.18992e+08	2.55233e+08	2.45319e+08	2.14722e+08	2.43949e+08	2.45718e+08	2.56468e+08	2.13245e+08	2.47119e+08	2.77491e+08	2.80968e+08	2.58136e+08	2.61429e+08	2.46747e+08	2.39283e+08
P61983	14-3-3 protein gamma OS=Rattus norvegicus OX=10116 GN=Ywhag PE=1 SV=2	3.30191e+09	3.62522e+09	3.67132e+09	3.31014e+09	3.26144e+09	3.3956e+09	3.68681e+09	3.26172e+09	3.64867e+09	3.57837e+09	3.28627e+09	3.33646e+09	3.81396e+09	2.99467e+09	3.60654e+09
F1M403	Ubiquitin-conjugating enzyme E2O OS=Rattus norvegicus OX=10116 GN=Ube2o PE=1 SV=2	3.01138e+08	3.17378e+08	3.1331e+08	3.13048e+08	3.12931e+08	3.06004e+08	2.83459e+08	3.19169e+08	3.24793e+08	3.0452e+08	3.12458e+08	2.63426e+08	3.31706e+08	3.11879e+08	3.20051e+08
Q6AYU2	Pcbp2 protein OS=Rattus norvegicus OX=10116 GN=Pcbp2 PE=2 SV=1	3.42514e+08	3.35457e+08	3.55897e+08	3.5617e+08	2.9181e+08	3.10048e+08	3.12067e+08	3.60569e+08	2.78793e+08	4.11141e+08	3.72953e+08	3.69906e+08	3.72728e+08	3.29313e+08	3.98349e+08
Q64560	Tripeptidyl-peptidase 2 OS=Rattus norvegicus OX=10116 GN=Tpp2 PE=2 SV=3	4.02432e+08	4.42276e+08	4.56022e+08	4.41882e+08	4.28901e+08	4.14498e+08	4.30365e+08	426071411	4.77017e+08	4.40372e+08	4.03083e+08	4.31895e+08	4.56162e+08	4.18112e+08	4.76155e+08
P68255	14-3-3 protein theta OS=Rattus norvegicus OX=10116 GN=Ywhaq PE=1 SV=1	3.77588e+09	3.88533e+09	4.00876e+09	3.77823e+09	3.8006e+09	3.67219e+09	3.95467e+09	3882324246	3.46806e+09	3.98367e+09	3.76583e+09	3.66099e+09	3.70447e+09	3.71178e+09	4.00143e+09
P12368	cAMP-dependent protein kinase type II-alpha regulatory subunit OS=Rattus norvegicus OX=10116 GN=Prkar2a PE=1 SV=4	6.63216e+08	6.87468e+08	6.81451e+08	6.27344e+08	7.37792e+08	6.12595e+08	6.68197e+08	6.10172e+08	6.05499e+08	6.93982e+08	6.41863e+08	5.924e+08	7.65729e+08	6.38172e+08	6.91242e+08
D3Z831	Protein NDRG4 OS=Rattus norvegicus OX=10116 GN=Ndrg4 PE=1 SV=1	2.7372e+06	1.99864e+06	2.26127e+06	1.71965e+06		2.59247e+06	1.49109e+06	1.64277e+06	2.35619e+06	2.58996e+06	3.57075e+06	2.20599e+06	1.89258e+06	1.95205e+06	2.31837e+06
P62198	26S proteasome regulatory subunit 8 OS=Rattus norvegicus OX=10116 GN=Psmc5 PE=1 SV=1	3.16065e+08	3.18926e+08	3.14455e+08	3.1388e+08	3.06073e+08	2.85001e+08	2.93943e+08	2.9922e+08	2.64338e+08	3.25615e+08	3.08745e+08	2.79999e+08	3.18303e+08	2.80177e+08	3.15045e+08
Q64559	Cytosolic acyl coenzyme A thioester hydrolase OS=Rattus norvegicus OX=10116 GN=Acot7 PE=1 SV=4	1.61073e+09	1.61708e+09	1.55079e+09	1.53227e+09	1.48453e+09	1.4253e+09	1.57349e+09	1.49409e+09	1.48727e+09	1.67065e+09	1.59531e+09	1.56005e+09	1.66056e+09	1.48195e+09	1.58464e+09
B5DFK1	Coatomer subunit alpha OS=Rattus norvegicus OX=10116 GN=Copa PE=2 SV=1	3.47409e+08	3.24712e+08	3.49457e+08	3.09689e+08	3.02836e+08	3.05608e+08	3.01961e+08	3.51986e+08	2.99967e+08	3.49533e+08	3.01237e+08	2.94532e+08	3.17454e+08	3.04661e+08	3.33177e+08
B2RYG2	Pck2 protein (Fragment) OS=Rattus norvegicus OX=10116 GN=Pck2 PE=2 SV=1	3.73645e+08	3.79566e+08	3.98641e+08	4.08211e+08	4.11844e+08	4.20412e+08	3.87625e+08	3.81026e+08	3.0608e+08	4.62813e+08	3.57125e+08	3.72672e+08	3.66239e+08	3.78445e+08	3.70118e+08
Q3T1K5	F-actin-capping protein subunit alpha-2 OS=Rattus norvegicus OX=10116 GN=Capza2 PE=1 SV=1	4.30061e+08	6.15134e+08	4.72641e+08	4.55385e+08	4.63112e+08	4.88508e+08	4.81394e+08	4.97773e+08	5.063e+08	5.2092e+08	4.63212e+08	4.91859e+08	4.86331e+08	4.94912e+08	6.26929e+08
Q561S0	NADH dehydrogenase [ubiquinone] 1 alpha subcomplex subunit 10, mitochondrial OS=Rattus norvegicus OX=10116 GN=Ndufa10 PE=1 SV=1	1.06672e+09	1.10858e+09	1.13636e+09	1.02952e+09	1.11791e+09	1.05002e+09	1.11081e+09	1.00228e+09	1.1552e+09	1.07889e+09	1.15646e+09	1.11886e+09	1.06073e+09	1.02307e+09	1.15391e+09
B2RYJ7	ARP1 actin-related protein 1 homolog B OS=Rattus norvegicus OX=10116 GN=Actr1b PE=1 SV=1	3.197e+08	3.31052e+08	3.11935e+08	2.90482e+08	3.09996e+08	2.98586e+08	2.95399e+08	3.1416e+08	3.18751e+08	3.22513e+08	3.17219e+08	3.21654e+08	2.95773e+08	3.04293e+08	3.08232e+08
Q6AYP5	Cell adhesion molecule 1 OS=Rattus norvegicus OX=10116 GN=Cadm1 PE=1 SV=1	3.32335e+08	3.80622e+08	3.18519e+08	3.03792e+08	3.31753e+08	3.34021e+08	3.12133e+08	3.29356e+08	3.23242e+08	3.53661e+08	3.04562e+08	3.13234e+08	3.53673e+08	3.44329e+08	3.26931e+08
Q99ML5	Prenylcysteine oxidase OS=Rattus norvegicus OX=10116 GN=Pcyox1 PE=1 SV=1	4.72682e+08	4.96709e+08	4.91827e+08	4.47151e+08	4.66981e+08	4.18088e+08	4.89804e+08	4.45015e+08	4.71296e+08	4.66348e+08	4.57667e+08	4.61123e+08	4.88365e+08	4.74565e+08	5.04087e+08
Q6P3V8	Eukaryotic translation initiation factor 4A1 OS=Rattus norvegicus OX=10116 GN=Eif4a1 PE=1 SV=1	1.81124e+08	1.91791e+08	2.02245e+08	2.25969e+08	1.90987e+08	1.89736e+08	2.07375e+08	2.11251e+08	1.91296e+08	2.2762e+08	2.05808e+08	2.3094e+08	1.8932e+08	1.79502e+08	2.1193e+08
Q64057	Alpha-aminoadipic semialdehyde dehydrogenase OS=Rattus norvegicus OX=10116 GN=Aldh7a1 PE=1 SV=2	7.36189e+08	8.05443e+08	7.38044e+08	6.43706e+08	6.29755e+08	7.46973e+08	7.49385e+08	8.24206e+08	6.59143e+08	1.10001e+09	8.39075e+08	1.03717e+09	7.49889e+08	7.63619e+08	6.52431e+08
A0A0G2K1S6	Malic enzyme OS=Rattus norvegicus OX=10116 GN=Me1 PE=1 SV=1	3.63654e+08	3.4512e+08	3.7873e+08	3.41076e+08	3.48539e+08	3.39045e+08	3.89228e+08	3.57437e+08	3.30464e+08	4.00586e+08	3.79575e+08	3.45129e+08	3.50807e+08	3.57827e+08	3.44436e+08
M0R544	Glucosidase, alpha, acid, isoform CRA_a OS=Rattus norvegicus OX=10116 GN=Gaa PE=1 SV=1	4.16899e+08	4.36054e+08	4.07083e+08	3.57408e+08	3.79817e+08	3.57178e+08	3.84606e+08	3.57439e+08	2.98334e+08	4.59526e+08	4.29807e+08	3.16303e+08	3.87716e+08	3.59888e+08	4.12367e+08
Q4V8H5	Aspartyl aminopeptidase OS=Rattus norvegicus OX=10116 GN=Dnpep PE=1 SV=1	3.52748e+08	4.03379e+08	4.00291e+08	3.58561e+08	3.50045e+08	3.64288e+08	3.42228e+08	3.73702e+08	3.44039e+08	4.04055e+08	4.00158e+08	3.731e+08	3.67072e+08	3.44284e+08	3.69686e+08
B5DF89	Cullin-3 OS=Rattus norvegicus OX=10116 GN=Cul3 PE=1 SV=2	3.18102e+08	3.05763e+08	3.20168e+08	3.21993e+08	3.07013e+08	3.185e+08	2.99115e+08	2.85293e+08	2.82002e+08	3.57186e+08	3.28744e+08	3.21592e+08	3.2179e+08	2.82791e+08	3.00036e+08
B2GV06	Succinyl-CoA:3-ketoacid coenzyme A transferase 1, mitochondrial OS=Rattus norvegicus OX=10116 GN=Oxct1 PE=1 SV=1	5.89025e+08	5.47689e+08	5.41797e+08	5.00212e+08	5.25144e+08	5.509e+08	5.26745e+08	5.72382e+08	7.34517e+08	4.83036e+08	5.90072e+08	5.81848e+08	5.73084e+08	5.26119e+08	5.37907e+08
D4AE68	Guanine nucleotide binding protein, alpha q polypeptide, isoform CRA_a OS=Rattus norvegicus OX=10116 GN=Gnaq PE=1 SV=2	4.47368e+08	4.53327e+08	4.61431e+08	4.24429e+08	4.39875e+08	4.38568e+08	4.63607e+08	4.35049e+08	4.38797e+08	5.10703e+08	4.805e+08	4.08969e+08	4.52544e+08	4.5583e+08	4.65706e+08
E9PTX9	Solute carrier family 12 member 2 OS=Rattus norvegicus OX=10116 GN=Slc12a2 PE=1 SV=1	5.48287e+08	5.802e+08	6.10735e+08	6.35917e+08	5.74006e+08	5.96277e+08	5.63421e+08	5.63769e+08	5.37928e+08	4.10589e+08	4.86475e+08	5.52608e+08	5.88564e+08	5.88212e+08	6.37409e+08
B1WC61	Acad9 protein OS=Rattus norvegicus OX=10116 GN=Acad9 PE=1 SV=1	4.44944e+08	4.52637e+08	3.4691e+08	4.15192e+08	4.58837e+08	4.14744e+08	3.98248e+08	3.63963e+08	3.85708e+08	4.81225e+08	4.18533e+08	4.61047e+08	4.27246e+08	3.16297e+08	4.3654e+08
F1LQI5	E3 ubiquitin-protein ligase UBR4 OS=Rattus norvegicus OX=10116 GN=Ubr4 PE=1 SV=1	1.45436e+08	1.60362e+08	1.82333e+08	1.51266e+08	1.31335e+08	1.56821e+08	1.3311e+08	1.49635e+08	1.36646e+08	1.68053e+08	1.52138e+08	1.31595e+08	1.78576e+08	1.39077e+08	1.23266e+08
Q62829	Serine/threonine-protein kinase PAK 3 OS=Rattus norvegicus OX=10116 GN=Pak3 PE=1 SV=1	2.11276e+08	1.93933e+08	1.9859e+08	1.84379e+08	1.56191e+08	1.64254e+08	2.00657e+08	1.72683e+08	1.58359e+08	1.91053e+08	1.57163e+08	1.5681e+08	2.30814e+08	1.81611e+08	1.82724e+08
D4AA63	Ubiquilin 2 OS=Rattus norvegicus OX=10116 GN=Ubqln2 PE=1 SV=1	3.9855e+08	3.83806e+08	3.45213e+08	2.75109e+08	3.90911e+08	2.86572e+08	3.02591e+08	3.50943e+08	3.34894e+08	3.60421e+08	3.93391e+08	3.7285e+08	3.46746e+08	3.53619e+08	4.24384e+08
Q60587	Trifunctional enzyme subunit beta, mitochondrial OS=Rattus norvegicus OX=10116 GN=Hadhb PE=1 SV=1	1.14534e+09	1.27488e+09	1.31041e+09	1.19239e+09	1.17898e+09	1.05146e+09	1.1891e+09	1.2623e+09	1.05292e+09	1.3597e+09	1.2554e+09	1.27821e+09	1.20107e+09	1.06902e+09	1.24129e+09
Q01986	Dual specificity mitogen-activated protein kinase kinase 1 OS=Rattus norvegicus OX=10116 GN=Map2k1 PE=1 SV=2	8.78426e+08	8.77324e+08	8.148e+08	7.20748e+08	8.05548e+08	7.71442e+08	8.73866e+08	7.03919e+08	1.07241e+09	8.69484e+08	6.79104e+08	7.56905e+08	8.88613e+08	8.16835e+08	6.81222e+08
A0A0G2K931	Phosphoserine aminotransferase OS=Rattus norvegicus OX=10116 GN=Psat1 PE=1 SV=1	7.65274e+07	8.18777e+07	7.2847e+07	7.86734e+07	7.07102e+07	9.32549e+07	7.68412e+07	75322664	7.11517e+07	6.30497e+07	7.30908e+07	7.74367e+07	7.26156e+07	8.20992e+07	8.09101e+07
A0A292G0W2	Gai-interacting protein OS=Rattus norvegicus OX=10116 GN=Phf24 PE=4 SV=1	4.83479e+08	4.49541e+08	4.47815e+08	4.07308e+08	4.85639e+08	4.34587e+08	3.70138e+08	422267565	6.568e+08	5.14992e+08	4.42351e+08	4.33456e+08	4.4047e+08	4.63793e+08	4.68429e+08
P07943	Aldose reductase OS=Rattus norvegicus OX=10116 GN=Akr1b1 PE=1 SV=3	2.0152e+09	2.01331e+09	1.95442e+09	2.13864e+09	2.1589e+09	2.34502e+09	1.91243e+09	1892848658	1.80047e+09	2.27522e+09	2.09694e+09	2.15261e+09	1.89699e+09	1.99232e+09	1.90143e+09
Q5XIT1	Microtubule-associated protein RP/EB family member 3 OS=Rattus norvegicus OX=10116 GN=Mapre3 PE=1 SV=1	1.36733e+09	1.40744e+09	1.41016e+09	1.407e+09	1.3381e+09	1.37343e+09	1.34543e+09	1.32733e+09	1.37309e+09	1.42679e+09	1.37033e+09	1.31244e+09	1.38057e+09	1.41752e+09	1.44062e+09
A0A0G2JZG7	Serine--tRNA ligase, cytoplasmic OS=Rattus norvegicus OX=10116 GN=Sars PE=1 SV=1	2.9491e+08	2.96676e+08	2.84634e+08	2.88142e+08	2.59019e+08	2.79923e+08	2.75349e+08	2.65158e+08	2.8652e+08	3.31013e+08	2.75787e+08	2.91862e+08	2.87225e+08	2.78193e+08	2.87847e+08
F1LNF0	Myosin heavy chain 14 OS=Rattus norvegicus OX=10116 GN=Myh14 PE=1 SV=1	9.02052e+07	9.02178e+07	9.90444e+07	9.38784e+07	7.99056e+07	1.32021e+08	8.37336e+07	9.57928e+07	8.50541e+07	9.01072e+07	9.49597e+07	1.35686e+08	1.02355e+08	1.04497e+08	1.02315e+08
Q5U302	Catenin (Cadherin associated protein), alpha 1 OS=Rattus norvegicus OX=10116 GN=Ctnna1 PE=1 SV=1	1.16745e+08	1.3285e+08	1.21308e+08	1.08546e+08	1.67239e+08	1.84427e+08	9.97647e+07	1.19583e+08	1.35323e+08	1.96569e+08	1.80825e+08	1.43445e+08	1.30698e+08	1.19197e+08	1.06597e+08
Q6AYS7	Aminoacylase-1A OS=Rattus norvegicus OX=10116 GN=Acy1a PE=1 SV=1	6.48768e+08	6.31926e+08	5.78223e+08	5.99157e+08	5.19647e+08	6.51971e+08	5.66496e+08	4.8456e+08	4.80485e+08	7.20748e+08	5.86968e+08	6.94166e+08	5.01075e+08	6.26423e+08	5.50436e+08
G3V774	F-box only protein 2 OS=Rattus norvegicus OX=10116 GN=Fbxo2 PE=4 SV=1	5.90703e+08	6.16668e+08	5.89324e+08	6.08326e+08	5.8975e+08	5.62559e+08	5.67666e+08	5.75722e+08	5.24245e+08	6.33594e+08	5.85103e+08	7.15727e+08	6.08789e+08	6.17261e+08	5.65407e+08
Q07310	Neurexin-3 OS=Rattus norvegicus OX=10116 GN=Nrxn3 PE=1 SV=1	2.96363e+08	3.3075e+08	3.07773e+08	2.77635e+08	2.865e+08	2.78264e+08	2.96272e+08	283219005	3.22906e+08	3.35961e+08	3.0119e+08	3.13911e+08	3.10792e+08	2.84202e+08	2.94839e+08
P31399	ATP synthase subunit d, mitochondrial OS=Rattus norvegicus OX=10116 GN=Atp5h PE=1 SV=3	3.56537e+09	3.82027e+09	4.00236e+09	3.66845e+09	3.51254e+09	3.33555e+09	3.57708e+09	3.46241e+09	3.83027e+09	3.33513e+09	3.50872e+09	3.47882e+09	3.7255e+09	3.49663e+09	3.75773e+09
Q62658	Peptidyl-prolyl cis-trans isomerase FKBP1A OS=Rattus norvegicus OX=10116 GN=Fkbp1a PE=1 SV=3	1.0171e+09	1.09562e+09	9.02117e+08	9.10176e+08	9.65855e+08	9.66457e+08	1.05937e+09	9.34258e+08	1.51884e+09	1.10739e+09	1.10896e+09	1.03126e+09	9.67216e+08	9.25379e+08	1.01507e+09
O35987	NSFL1 cofactor p47 OS=Rattus norvegicus OX=10116 GN=Nsfl1c PE=1 SV=1	4.99396e+08	4.95724e+08	5.51215e+08	5.30486e+08	5.36989e+08	6.02123e+08	4.51751e+08	5.12133e+08	4.71433e+08	6.28237e+08	6.08836e+08	5.91582e+08	4.97372e+08	5.10303e+08	4.82796e+08
Q68FU2	Phosphoserine aminotransferase OS=Rattus norvegicus OX=10116 GN=Psat1 PE=2 SV=1	7.28109e+07	8.5226e+07	7.17737e+07	8.90332e+07	6.4888e+07	7.22058e+07	6.37445e+07	73562064	7.73653e+07	5.44692e+07	5.7951e+07	8.6906e+07	7.49555e+07	6.78298e+07	6.37241e+07
Q6AYR2	Protein NDRG3 OS=Rattus norvegicus OX=10116 GN=Ndrg3 PE=1 SV=1	2.69011e+08	3.08772e+08	3.31708e+08	2.64707e+08	3.21269e+08	2.70016e+08	2.77021e+08	3.00154e+08	2.86167e+08	4.48539e+08	3.18388e+08	3.40381e+08	3.37956e+08	3.05547e+08	3.2569e+08
Q04462	Valine--tRNA ligase OS=Rattus norvegicus OX=10116 GN=Vars PE=2 SV=2	2.74388e+08	2.8701e+08	2.80032e+08	2.54113e+08	2.64376e+08	2.53397e+08	2.80572e+08	2.89184e+08	2.69404e+08	2.66072e+08	2.48257e+08	2.2989e+08	2.80439e+08	2.58533e+08	3.02729e+08
A0A0G2JTN4	Phosphoribosylformylglycinamidine synthase OS=Rattus norvegicus OX=10116 GN=Pfas PE=1 SV=1	2.34559e+08	2.55373e+08	2.58705e+08	2.39009e+08	2.21254e+08	2.35639e+08	2.74041e+08	2.32079e+08	2.25309e+08	2.58051e+08	2.30647e+08	2.28058e+08	2.39027e+08	2.29497e+08	2.41629e+08
I7FKL4	Myelin basic protein transcript variant 1 OS=Rattus norvegicus OX=10116 GN=Mbp PE=2 SV=1	2.81462e+08	2.08991e+08	1.99822e+08	2.50828e+08	2.04355e+08	5.86498e+08	2.40361e+08	288442780	3.21741e+08	1.6146e+08	2.75189e+08	3.7431e+08	1.49286e+08	2.34585e+08	1.30348e+08
A0A0H2UHE1	Succinate--CoA ligase [ADP/GDP-forming] subunit alpha, mitochondrial OS=Rattus norvegicus OX=10116 GN=Suclg1 PE=1 SV=1	1.62706e+09	1.71307e+09	1.62483e+09	1.77069e+09	1.89181e+09	1.82969e+09	1.70315e+09	1.5634e+09	1.86379e+09	1.81518e+09	1.98245e+09	1.90309e+09	1.78464e+09	1.59482e+09	1.54448e+09
A0A0G2K719	DEAD-box helicase 3, X-linked OS=Rattus norvegicus OX=10116 GN=Ddx3x PE=1 SV=1	6.37941e+07	6.59557e+07	6.10804e+07	6.03744e+07	6.48392e+07	6.25377e+07	7.27889e+07	6.92495e+07	6.17853e+07	6.1104e+07	6.3337e+07	5.82925e+07	6.16055e+07	6.12346e+07	6.01436e+07
Q9QVC8	Peptidyl-prolyl cis-trans isomerase FKBP4 OS=Rattus norvegicus OX=10116 GN=Fkbp4 PE=1 SV=3	5.7789e+08	6.78428e+08	7.00318e+08	6.44048e+08	6.12909e+08	5.53149e+08	6.17185e+08	623971120	5.24974e+08	7.25665e+08	5.70333e+08	5.621e+08	6.68592e+08	6.60124e+08	6.7685e+08
Q68FW9	COP9 signalosome complex subunit 3 OS=Rattus norvegicus OX=10116 GN=Cops3 PE=1 SV=1	2.10702e+08	2.1816e+08	2.14066e+08	2.12144e+08	2.46947e+08	2.58271e+08	2.15493e+08	2.11451e+08	1.82766e+08	2.59681e+08	2.05847e+08	2.15357e+08	1.9587e+08	1.76838e+08	1.89765e+08
A0A0G2K9L2	Target of myb1-like 2 membrane-trafficking protein OS=Rattus norvegicus OX=10116 GN=Tom1l2 PE=1 SV=1	2.28322e+08	2.61397e+08	2.36766e+08	2.31579e+08	2.5571e+08	3.23893e+08	2.14055e+08	2.32146e+08	1.95579e+08	3.18786e+08	3.54216e+08	2.32946e+08	1.91219e+08	2.10647e+08	2.15489e+08
B5DFC4	Protein kinase C OS=Rattus norvegicus OX=10116 GN=Prkca PE=2 SV=1	1.09877e+08	1.48745e+08	1.38187e+08	1.36464e+08	1.46286e+08	1.83207e+08	1.0412e+08	1.32702e+08	1.93557e+08	1.42948e+08	1.34208e+08	9.23977e+07	1.07378e+08	1.02658e+08	1.4159e+08
O88989	Malate dehydrogenase, cytoplasmic OS=Rattus norvegicus OX=10116 GN=Mdh1 PE=1 SV=3	9.81136e+09	1.0391e+10	1.06178e+10	1.01028e+10	9.78761e+09	8.9995e+09	9.91057e+09	9.63167e+09	1.02462e+10	9.61327e+09	9.59101e+09	9.6544e+09	1.0552e+10	9.82085e+09	1.03554e+10
O35458	Vesicular inhibitory amino acid transporter OS=Rattus norvegicus OX=10116 GN=Slc32a1 PE=1 SV=1	1.22775e+09	1.18302e+09	1.13688e+09	1.20185e+09	1.24145e+09	1.39893e+09	1.06342e+09	9.64358e+08	1.09019e+09	1.4063e+09	1.22668e+09	1.19207e+09	1.24318e+09	1.14688e+09	1.15341e+09
P13803	Electron transfer flavoprotein subunit alpha, mitochondrial OS=Rattus norvegicus OX=10116 GN=Etfa PE=1 SV=4	4.07758e+08	4.14945e+08	3.93774e+08	4.04068e+08	4.07783e+08	4.04973e+08	4.07633e+08	4.35916e+08	3.79764e+08	4.38524e+08	4.24068e+08	4.39248e+08	4.0065e+08	4.00091e+08	4.40939e+08
Q91ZN1	Coronin-1A OS=Rattus norvegicus OX=10116 GN=Coro1a PE=1 SV=3	3.74143e+08	4.69174e+08	4.30534e+08	4.01321e+08	4.51549e+08	4.44457e+08	4.19823e+08	4.38198e+08	5.57814e+08	4.87304e+08	4.4702e+08	4.60103e+08	4.40766e+08	4.49288e+08	4.69884e+08
P68182	cAMP-dependent protein kinase catalytic subunit beta OS=Rattus norvegicus OX=10116 GN=Prkacb PE=1 SV=2	3.07529e+08	3.27343e+08	3.00109e+08	2.53571e+08	2.97132e+08	2.24913e+08	2.96644e+08	2.65224e+08	3.77771e+08	3.04566e+08	2.95621e+08	2.46212e+08	3.33796e+08	2.92515e+08	2.98256e+08
P16446	Phosphatidylinositol transfer protein alpha isoform OS=Rattus norvegicus OX=10116 GN=Pitpna PE=1 SV=2	1.23346e+09	1.21764e+09	1.36174e+09	1.28771e+09	1.3168e+09	1.11039e+09	1.16062e+09	1.2875e+09	1.0678e+09	1.28069e+09	1.1899e+09	1.10728e+09	1.32446e+09	1.18227e+09	1.23647e+09
P35465	Serine/threonine-protein kinase PAK 1 OS=Rattus norvegicus OX=10116 GN=Pak1 PE=1 SV=3	3.55821e+08	3.89154e+08	3.97761e+08	3.49821e+08	3.51321e+08	3.23209e+08	3.51415e+08	3.34671e+08	3.76315e+08	3.21028e+08	3.5644e+08	3.35207e+08	3.59625e+08	3.55228e+08	3.76856e+08
B2RYW9	Fumarylacetoacetate hydrolase domain-containing protein 2 OS=Rattus norvegicus OX=10116 GN=Fahd2 PE=1 SV=1	5.94358e+08	6.04214e+08	5.84285e+08	6.07557e+08	6.29081e+08	6.68567e+08	5.26326e+08	505032114	6.90437e+08	6.48353e+08	6.22809e+08	6.39789e+08	5.43989e+08	5.67038e+08	5.7964e+08
P68511	14-3-3 protein eta OS=Rattus norvegicus OX=10116 GN=Ywhah PE=1 SV=2	2.86635e+09	2.87973e+09	2.93585e+09	2.87401e+09	3.25929e+09	3.17741e+09	2.80722e+09	2.5635e+09	2.74497e+09	3.41542e+09	3.06985e+09	3.05558e+09	2.90743e+09	2.66438e+09	2.82347e+09
Q5XI22	Acetyl-CoA acetyltransferase, cytosolic OS=Rattus norvegicus OX=10116 GN=Acat2 PE=1 SV=1	5.01567e+08	4.73457e+08	4.64594e+08	5.03117e+08	5.04176e+08	5.36951e+08	4.94929e+08	4.98018e+08	4.69088e+08	5.47391e+08	5.23588e+08	5.70706e+08	4.99639e+08	4.68404e+08	4.98598e+08
D3ZPR0	Chromosome segregation 1-like OS=Rattus norvegicus OX=10116 GN=Cse1l PE=1 SV=1	2.26512e+08	2.20837e+08	2.26802e+08	2.18711e+08	2.34127e+08	2.27786e+08	1.91092e+08	2.15239e+08	2.04581e+08	2.59555e+08	2.36106e+08	2.40264e+08	2.17219e+08	2.20164e+08	2.41729e+08
D3Z955	Phosphoglucomutase 2-like 1 OS=Rattus norvegicus OX=10116 GN=Pgm2l1 PE=1 SV=1	5.46359e+08	5.3338e+08	5.44954e+08	5.70294e+08	5.03215e+08	5.18567e+08	5.61841e+08	5.50784e+08	5.95092e+08	4.45114e+08	4.4244e+08	3.77374e+08	5.39546e+08	5.17441e+08	5.54816e+08
G3V6S2	Cytoplasmic aconitate hydratase OS=Rattus norvegicus OX=10116 GN=Aco1 PE=1 SV=1	4.58351e+08	4.75684e+08	4.41857e+08	4.4806e+08	4.6984e+08	4.23834e+08	4.7801e+08	4.61321e+08	3.97647e+08	4.67736e+08	4.209e+08	4.73694e+08	4.42554e+08	4.93387e+08	5.09229e+08
B2GUZ9	Fam49b protein OS=Rattus norvegicus OX=10116 GN=Fam49b PE=1 SV=1	3.38228e+08	3.71339e+08	3.5823e+08	3.43862e+08	3.55234e+08	2.71865e+08	3.62897e+08	331169850	3.75321e+08	3.91003e+08	3.4066e+08	3.50239e+08	3.84448e+08	3.79327e+08	4.0941e+08
P14882	Propionyl-CoA carboxylase alpha chain, mitochondrial OS=Rattus norvegicus OX=10116 GN=Pcca PE=1 SV=3	5.93274e+06	6.20554e+06	5.68523e+06	4.27058e+06	6.48906e+06	5.53742e+06	5.40981e+06	5.7923e+06	4.44601e+06	4.81006e+06	5.39373e+06	4.57415e+06	4.21102e+06	6.15499e+06	4.79608e+06
Q6GMM8	Long-chain fatty acid transport protein 1 OS=Rattus norvegicus OX=10116 GN=Slc27a1 PE=1 SV=1	3.81766e+08	4.49098e+08	4.73634e+08	3.55181e+08	3.52076e+08	3.7459e+08	3.86757e+08	4.33555e+08	3.19338e+08	3.93644e+08	4.28655e+08	3.79582e+08	3.52989e+08	3.67202e+08	4.3114e+08
Q5U2X8	Acyl-CoA thioesterase 9 OS=Rattus norvegicus OX=10116 GN=Acot9 PE=1 SV=1	6.92661e+08	6.54837e+08	7.62681e+08	6.89978e+08	6.03032e+08	5.67785e+08	6.32502e+08	6.87785e+08	6.66237e+08	6.89237e+08	6.34466e+08	5.71303e+08	6.34825e+08	5.48974e+08	6.38719e+08
P39069	Adenylate kinase isoenzyme 1 OS=Rattus norvegicus OX=10116 GN=Ak1 PE=1 SV=3	1.59416e+09	1.72301e+09	1.76026e+09	1.61677e+09	1.63641e+09	1.53722e+09	1.60259e+09	1.5974e+09	1.67565e+09	1.79602e+09	1.76897e+09	1.74548e+09	1.6502e+09	1.55288e+09	1.61859e+09
M0RAP5	SET-binding factor 1 OS=Rattus norvegicus OX=10116 GN=Sbf1 PE=1 SV=1	1.97099e+08	1.89624e+08	2.13867e+08	2.05826e+08	1.93654e+08	1.89915e+08	1.95722e+08	2.10858e+08	2.34443e+08	1.931e+08	1.91704e+08	2.14611e+08	2.12486e+08	2.09811e+08	1.88553e+08
Q68FQ9	LanC lantibiotic synthetase component C-like 2 (Bacterial) OS=Rattus norvegicus OX=10116 GN=Lancl2 PE=1 SV=1	4.76368e+08	4.88872e+08	4.55748e+08	4.41125e+08	4.3877e+08	4.21481e+08	4.82535e+08	4.43736e+08	4.76055e+08	5.03948e+08	4.5005e+08	4.37978e+08	4.91661e+08	4.696e+08	4.68486e+08
Q641Y8	ATP-dependent RNA helicase DDX1 OS=Rattus norvegicus OX=10116 GN=Ddx1 PE=1 SV=1	3.68387e+08	3.9033e+08	3.64673e+08	3.84e+08	3.46434e+08	3.31941e+08	3.52028e+08	3.66082e+08	3.35209e+08	3.52809e+08	3.61381e+08	3.75281e+08	3.4191e+08	3.54128e+08	3.66375e+08
Q68FS2	COP9 signalosome complex subunit 4 OS=Rattus norvegicus OX=10116 GN=Cops4 PE=1 SV=1	3.79833e+08	3.79906e+08	4.84069e+08	4.74818e+08	4.54802e+08	4.38065e+08	3.7849e+08	3.60284e+08	3.37163e+08	3.87794e+08	3.46256e+08	4.34826e+08	4.47469e+08	6.48452e+08	4.7919e+08
G3V846	Amino acid transporter OS=Rattus norvegicus OX=10116 GN=Slc1a3 PE=1 SV=1	4.58087e+09	4.52951e+09	4.68182e+09	3.89691e+09	4.26829e+09	3.97216e+09	4.82493e+09	4403401254	3.64797e+09	4.96246e+09	4.30886e+09	3.90704e+09	4.59758e+09	4.37064e+09	4.63585e+09
P38983	40S ribosomal protein SA OS=Rattus norvegicus OX=10116 GN=Rpsa PE=1 SV=3	7.23538e+08	7.47475e+08	7.86109e+08	7.39092e+08	7.43872e+08	6.78252e+08	7.18673e+08	7.326e+08	6.79361e+08	7.7786e+08	7.27581e+08	7.04811e+08	7.54913e+08	7.51391e+08	8.08421e+08
Q5M7T6	V-type proton ATPase subunit OS=Rattus norvegicus OX=10116 GN=Atp6v0d1 PE=1 SV=1	2.04371e+09	1.9991e+09	2.13433e+09	1.97035e+09	1.96917e+09	1.77913e+09	1.9847e+09	1.8582e+09	2.27202e+09	2.20295e+09	2.07303e+09	2.04434e+09	2.04557e+09	1.89318e+09	1.99352e+09
O08557	N(G),N(G)-dimethylarginine dimethylaminohydrolase 1 OS=Rattus norvegicus OX=10116 GN=Ddah1 PE=1 SV=3	1.17846e+09	1.19125e+09	1.18119e+09	1.13197e+09	1.12192e+09	1.07622e+09	1.13293e+09	1043496386	1.10621e+09	1.1507e+09	1.10552e+09	1.11587e+09	1.20941e+09	1.08458e+09	1.15771e+09
G3V949	CAP-Gly domain-containing linker protein 2 OS=Rattus norvegicus OX=10116 GN=Clip2 PE=1 SV=1	1.64834e+08	1.6269e+08	1.80302e+08	1.76477e+08	1.70006e+08	1.80702e+08	1.57584e+08	1.7068e+08	1.82209e+08	1.51873e+08	1.75862e+08	1.72199e+08	1.7731e+08	1.70143e+08	1.54657e+08
F1LP82	Ras-related protein Rab-2A OS=Rattus norvegicus OX=10116 GN=Rab2a PE=1 SV=3	7.58217e+08	7.90379e+08	7.38376e+08	7.99575e+08	7.67719e+08	7.55013e+08	7.34049e+08	688524999	7.46413e+08	8.36575e+08	7.94124e+08	8.00703e+08	8.12544e+08	7.3416e+08	7.51547e+08
Q6AYT3	tRNA-splicing ligase RtcB homolog OS=Rattus norvegicus OX=10116 GN=Rtcb PE=2 SV=1	2.94349e+08	2.43716e+08	2.8982e+08	2.78055e+08	2.6485e+08	2.67422e+08	1.87502e+08	352293400	2.67011e+08	3.09438e+08	2.72179e+08	2.92346e+08	2.79185e+08	2.83406e+08	2.48088e+08
Q9QX69	LanC-like protein 1 OS=Rattus norvegicus OX=10116 GN=Lancl1 PE=1 SV=2	5.10927e+08	4.45607e+08	4.52965e+08	4.98807e+08	4.59823e+08	4.38843e+08	5.01126e+08	5.15028e+08	5.3022e+08	4.7043e+08	4.80585e+08	5.41098e+08	4.61824e+08	4.14917e+08	4.86867e+08
P36876	Serine/threonine-protein phosphatase 2A 55 kDa regulatory subunit B alpha isoform OS=Rattus norvegicus OX=10116 GN=Ppp2r2a PE=2 SV=1	3.07102e+08	2.9855e+08	3.49116e+08	3.17331e+08	2.88904e+08	3.0605e+08	3.47139e+08	2.8838e+08	3.76818e+08	2.91136e+08	2.97096e+08	2.93431e+08	3.22215e+08	2.60607e+08	3.18694e+08
F8WFW5	Phosphodiesterase OS=Rattus norvegicus OX=10116 GN=Pde2a PE=1 SV=1	2.97515e+08	2.53046e+08	2.7766e+08	2.77263e+08	2.28074e+08	2.52532e+08	2.54809e+08	2.46978e+08	4.83935e+08	2.67995e+08	2.35133e+08	2.35238e+08	2.62305e+08	2.90477e+08	3.0802e+08
B2GUZ5	F-actin-capping protein subunit alpha-1 OS=Rattus norvegicus OX=10116 GN=Capza1 PE=1 SV=1	3.32561e+08	3.33065e+08	2.98505e+08	2.50254e+08	2.61404e+08	2.9272e+08	2.71281e+08	3.01055e+08	2.33859e+08	3.22247e+08	3.1291e+08	2.75276e+08	3.16394e+08	2.85838e+08	3.09063e+08
F1LPK7	Plastin 3 (T-isoform), isoform CRA_a OS=Rattus norvegicus OX=10116 GN=Pls3 PE=1 SV=2	2.35023e+08	2.18807e+08	2.55638e+08	2.7423e+08	2.44492e+08	3.0952e+08	1.95873e+08	260383445	2.01075e+08	2.63055e+08	2.38612e+08	3.33346e+08	2.28667e+08	2.81018e+08	2.52611e+08
P47728	Calretinin OS=Rattus norvegicus OX=10116 GN=Calb2 PE=1 SV=1	2.77416e+09	2.88832e+09	2.81839e+09	3.27285e+09	2.78475e+09	2.98759e+09	3.12227e+09	2.94267e+09	2.56063e+09	2.99095e+09	2.79166e+09	3.1338e+09	2.83414e+09	2.91859e+09	2.95555e+09
D4A6H8	Catenin alpha 2 OS=Rattus norvegicus OX=10116 GN=Ctnna2 PE=1 SV=3	1.14416e+08	1.23485e+08	1.31333e+08	1.18862e+08	1.3173e+08	1.09771e+08	1.36018e+08	1.01392e+08	1.43182e+08	1.49503e+08	1.50818e+08	1.23158e+08	1.36363e+08	1.17193e+08	1.3322e+08
A0A0G2K9H8	FK506 binding protein 11 OS=Rattus norvegicus OX=10116 GN=Arf3 PE=3 SV=1	602574	1.33558e+06	207742		1.89332e+06	583525	2.14936e+06		2.65335e+06	4.44152e+06	3.16605e+06	653095
Q08877	Dynamin-3 OS=Rattus norvegicus OX=10116 GN=Dnm3 PE=1 SV=2	7.14328e+07	9.22846e+07	9.24992e+07	7.64895e+07	1.14991e+08	1.11832e+08	5.99911e+07	9.20192e+07	2.76593e+08	1.01805e+08	5.16155e+07	8.40733e+07	5.55501e+07	6.97119e+07	9.94632e+07
I7EFB0	Myelin basic protein transcript variant N (Fragment) OS=Rattus norvegicus OX=10116 GN=Mbp PE=2 SV=1	1.41062e+08	1.21291e+08	1.16967e+08	1.44988e+08	1.14093e+08	1.91316e+08	1.40038e+08	155093170	1.61504e+08	5.79394e+07	8.3359e+07	1.12747e+08	1.01583e+08	1.12301e+08	1.0102e+08
P19139	Casein kinase II subunit alpha OS=Rattus norvegicus OX=10116 GN=Csnk2a1 PE=1 SV=2	3.22824e+08	3.80313e+08	3.59372e+08	3.33453e+08	3.09773e+08	2.80469e+08	3.35443e+08	3.38377e+08	3.63454e+08	3.73387e+08	3.21711e+08	3.35322e+08	3.76533e+08	3.45244e+08	3.52614e+08
Q5XIH7	Prohibitin-2 OS=Rattus norvegicus OX=10116 GN=Phb2 PE=1 SV=1	2.05304e+09	2.06922e+09	2.09479e+09	2.06359e+09	2.12859e+09	2.16309e+09	2.10654e+09	1987029536	2.07332e+09	2.38797e+09	2.42337e+09	2.28852e+09	2.06576e+09	1.91058e+09	1.96208e+09
P84079	ADP-ribosylation factor 1 OS=Rattus norvegicus OX=10116 GN=Arf1 PE=1 SV=2							2.50353e+06	208892		4.19841e+06
P29066	Beta-arrestin-1 OS=Rattus norvegicus OX=10116 GN=Arrb1 PE=1 SV=1	2.76984e+08	2.89222e+08	2.85446e+08	2.71489e+08	2.49791e+08	2.44504e+08	2.63599e+08	2.52896e+08	2.47129e+08	2.73502e+08	2.56508e+08	2.69882e+08	2.44286e+08	2.63169e+08	2.75329e+08
P63245	Receptor of activated protein C kinase 1 OS=Rattus norvegicus OX=10116 GN=Rack1 PE=1 SV=3	8.62911e+08	8.72762e+08	9.00899e+08	9.18397e+08	8.543e+08	7.9293e+08	7.61476e+08	925413679	8.09018e+08	9.10634e+08	8.34295e+08	9.53397e+08	9.08855e+08	8.53535e+08	9.27056e+08
P24155	Thimet oligopeptidase OS=Rattus norvegicus OX=10116 GN=Thop1 PE=1 SV=4	3.13836e+08	2.91763e+08	3.86323e+08	2.95378e+08	3.02853e+08	3.07125e+08	3.53139e+08	3.54548e+08	2.76801e+08	3.24036e+08	2.98917e+08	2.91235e+08	2.79496e+08	2.82223e+08	3.00249e+08
O08662	Phosphatidylinositol 4-kinase alpha OS=Rattus norvegicus OX=10116 GN=Pi4ka PE=1 SV=2	2.60503e+08	2.91089e+08	3.23535e+08	2.87263e+08	3.01121e+08	2.48021e+08	2.48055e+08	2.79065e+08	2.96083e+08	2.93111e+08	3.04227e+08	2.79574e+08	3.2379e+08	2.78386e+08	2.85915e+08
A0A0G2K5P9	Propionyl-CoA carboxylase alpha chain, mitochondrial OS=Rattus norvegicus OX=10116 GN=Pcca PE=1 SV=1	1.69246e+07	1.65004e+07	2.03436e+07	1.64981e+07	1.96633e+07	1.97708e+07	1.4283e+07	20341832	1.52612e+07	1.63127e+07	1.60132e+07	1.55559e+07	1.81564e+07	1.56464e+07	1.71939e+07
B0BN63	Activator of Hsp90 ATPase activity 1 OS=Rattus norvegicus OX=10116 GN=Ahsa1 PE=1 SV=1	6.95754e+08	6.94654e+08	6.96838e+08	6.60075e+08	6.84633e+08	7.10645e+08	7.17496e+08	6.42992e+08	6.03189e+08	7.51688e+08	6.90215e+08	6.95179e+08	6.81443e+08	6.40875e+08	6.58942e+08
P70566	Tropomodulin-2 OS=Rattus norvegicus OX=10116 GN=Tmod2 PE=1 SV=1	5.74113e+08	5.87386e+08	5.79063e+08	5.98149e+08	5.79748e+08	5.68346e+08	6.55872e+08	5.86004e+08	5.79542e+08	5.54744e+08	5.68742e+08	5.60713e+08	5.90352e+08	5.70801e+08	5.68412e+08
Q9Z1N4	3'(2'),5'-bisphosphate nucleotidase 1 OS=Rattus norvegicus OX=10116 GN=Bpnt1 PE=1 SV=1	6.18768e+06	1.02187e+07	1.00576e+07	7.14644e+06	6.72291e+06	7.99698e+06	6.80024e+06	7.2326e+06	7.13421e+06	9.9961e+06	8.04376e+06	1.26225e+07	8.7494e+06	9.48467e+06	9.79874e+06
A0A0G2K2M8	Tripartite motif-containing protein 2 OS=Rattus norvegicus OX=10116 GN=Trim2 PE=1 SV=1	2.91955e+08	2.61125e+08	2.32126e+08	2.24514e+08	3.09229e+08	2.52986e+08	2.59494e+08	2.27977e+08	2.61731e+08	3.72646e+08	3.0943e+08	3.21782e+08	2.72482e+08	3.44564e+08	2.84344e+08
P25235	Dolichyl-diphosphooligosaccharide--protein glycosyltransferase subunit 2 OS=Rattus norvegicus OX=10116 GN=Rpn2 PE=2 SV=2	1.82735e+08	1.7647e+08	1.95711e+08	1.85399e+08	1.99555e+08	1.64183e+08	1.84932e+08	1.90481e+08	1.67997e+08	2.01357e+08	1.88777e+08	1.57849e+08	1.93446e+08	1.6493e+08	1.80485e+08
Q920Q0	Paralemmin-1 OS=Rattus norvegicus OX=10116 GN=Palm PE=1 SV=1	5.87257e+08	6.11006e+08	5.94007e+08	6.52266e+08	6.17759e+08	6.48152e+08	5.70932e+08	5.211e+08	6.3471e+08	7.15331e+08	6.55558e+08	5.8912e+08	5.68194e+08	6.03546e+08	5.37785e+08
P35332	Hippocalcin-like protein 4 OS=Rattus norvegicus OX=10116 GN=Hpcal4 PE=2 SV=2	2.27036e+08	2.61946e+08	2.47088e+08	1.98687e+08	2.04041e+08	1.94401e+08	2.81037e+08	2.12124e+08	2.56078e+08	2.76866e+08	2.57317e+08	2.20953e+08	2.15759e+08	2.28541e+08	2.35303e+08
Q9JHZ4	GRIP1-associated protein 1 OS=Rattus norvegicus OX=10116 GN=Gripap1 PE=1 SV=1	1.72156e+08	1.82195e+08	1.75456e+08	1.71876e+08	1.7717e+08	1.49932e+08	1.59344e+08	1.64592e+08	1.65951e+08	1.73788e+08	1.63714e+08	1.55379e+08	1.93555e+08	1.5875e+08	2.079e+08
Q5XHZ0	Heat shock protein 75 kDa, mitochondrial OS=Rattus norvegicus OX=10116 GN=Trap1 PE=1 SV=1	2.5159e+08	2.88692e+08	2.9743e+08	2.67523e+08	2.90404e+08	2.93976e+08	2.54908e+08	2.62638e+08	2.59469e+08	2.7981e+08	2.75907e+08	2.64046e+08	2.79105e+08	2.68922e+08	2.7733e+08
P14669	Annexin A3 OS=Rattus norvegicus OX=10116 GN=Anxa3 PE=1 SV=4	4.61935e+08	5.15381e+08	4.82628e+08	4.80097e+08	4.81342e+08	4.27571e+08	3.52415e+08	472756447	4.82741e+08	5.37967e+08	4.81542e+08	4.50572e+08	4.63033e+08	4.78767e+08	4.35994e+08
F1LMW7	Myristoylated alanine-rich C-kinase substrate OS=Rattus norvegicus OX=10116 GN=Marcks PE=1 SV=3	4.14299e+09	4.10354e+09	4.07482e+09	4.26652e+09	3.93506e+09	3.85074e+09	3.9838e+09	3.92539e+09	3.37621e+09	4.41372e+09	3.99016e+09	3.91157e+09	4.10629e+09	3.97681e+09	4.33638e+09
P49803	Regulator of G-protein signaling 7 OS=Rattus norvegicus OX=10116 GN=Rgs7 PE=1 SV=2	8.74649e+07	1.23736e+08	1.21101e+08	1.10091e+08	1.31575e+08	9.74839e+07	9.96047e+07	9.48168e+07	1.27274e+08	1.29357e+08	1.19949e+08	1.2677e+08	1.19108e+08	1.33728e+08	1.44253e+08
O35077	Glycerol-3-phosphate dehydrogenase [NAD(+)], cytoplasmic OS=Rattus norvegicus OX=10116 GN=Gpd1 PE=1 SV=4	6.92932e+08	7.4201e+08	7.85944e+08	8.14769e+08	7.10752e+08	6.95558e+08	8.57395e+08	7.13945e+08	7.36375e+08	4.87366e+08	6.22029e+08	7.14574e+08	7.53201e+08	8.20566e+08	7.15072e+08
A0A0G2K4N7	Membrane palmitoylated protein 6 OS=Rattus norvegicus OX=10116 GN=Mpp6 PE=1 SV=1	6.71495e+08	6.81887e+08	7.0364e+08	6.89544e+08	6.68709e+08	5.59076e+08	6.05142e+08	6.64717e+08	5.24175e+08	7.42556e+08	6.28e+08	5.73495e+08	6.71146e+08	6.84846e+08	6.87025e+08
B2GUZ3	Methylenetetrahydrofolate dehydrogenase (NADP+-dependent) 1-like OS=Rattus norvegicus OX=10116 GN=Mthfd1l PE=1 SV=1	3.20787e+08	3.22523e+08	3.3918e+08	3.2837e+08	3.05668e+08	3.00532e+08	3.36761e+08	3.19034e+08	2.85232e+08	3.42446e+08	3.19748e+08	2.77838e+08	3.50228e+08	3.15264e+08	3.34439e+08
P14659	Heat shock-related 70 kDa protein 2 OS=Rattus norvegicus OX=10116 GN=Hspa2 PE=1 SV=2	2.30381e+07	3.50531e+07	3.68565e+07	4.61976e+07	1.8923e+07	3.82535e+07	3.57995e+07	1.70106e+07	6.35967e+06	2.59229e+07	3.49777e+07	1.90029e+07	1.93306e+07	3.38259e+07	4.41734e+07
P04182	Ornithine aminotransferase, mitochondrial OS=Rattus norvegicus OX=10116 GN=Oat PE=1 SV=1	5.35389e+08	5.92044e+08	5.59182e+08	5.24182e+08	5.61136e+08	4.63193e+08	5.06879e+08	5.06867e+08	5.34496e+08	5.20851e+08	5.01623e+08	5.3308e+08	5.49481e+08	5.46297e+08	5.7484e+08
F1M4A4	Kinesin family member 1A OS=Rattus norvegicus OX=10116 GN=Kif1a PE=1 SV=3	2.53239e+08	2.30913e+08	2.67601e+08	2.43526e+08	2.61792e+08	2.21503e+08	2.13973e+08	2.39915e+08	2.42783e+08	2.20608e+08	2.50427e+08	2.42805e+08	2.35098e+08	2.2061e+08	2.91867e+08
Q5U2S7	Proteasome (Prosome, macropain) 26S subunit, non-ATPase, 3 OS=Rattus norvegicus OX=10116 GN=Psmd3 PE=1 SV=1	4.42921e+08	4.41683e+08	4.70307e+08	4.62851e+08	4.83762e+08	4.43944e+08	5.77335e+08	4.78575e+08	4.38247e+08	4.88282e+08	4.78298e+08	5.48159e+08	4.70616e+08	4.48042e+08	4.68498e+08
P08009	Glutathione S-transferase Yb-3 OS=Rattus norvegicus OX=10116 GN=Gstm3 PE=1 SV=2	2.1642e+09	2.1261e+09	2.24518e+09	2.21877e+09	2.02005e+09	1.99249e+09	1.2037e+09	2259712807	1.8133e+09	2.29777e+09	2.19659e+09	2.13066e+09	2.04257e+09	2.22621e+09	2.23336e+09
D3ZT07	Septin 5, isoform CRA_c OS=Rattus norvegicus OX=10116 GN=Sept5 PE=1 SV=2	8.7094e+07	7.32147e+07	7.40123e+07	7.41227e+07	7.39511e+07	1.01934e+08	6.71511e+07	57948951	7.73192e+07	4.36393e+07	4.25026e+07	3.543e+07	6.88002e+07	5.80591e+07	5.55196e+07
Q06647	ATP synthase subunit O, mitochondrial OS=Rattus norvegicus OX=10116 GN=Atp5o PE=1 SV=1	3.48368e+09	3.5369e+09	3.54948e+09	3.14666e+09	3.40909e+09	3.48841e+09	3.50624e+09	3.49167e+09	3.56192e+09	3.27507e+09	3.45223e+09	3.2664e+09	3.5285e+09	3.34813e+09	3.57207e+09
P04775	Sodium channel protein type 2 subunit alpha OS=Rattus norvegicus OX=10116 GN=Scn2a PE=1 SV=1	2.70637e+07	2.73273e+07	2.67905e+07	2.23252e+07	2.3356e+07	2.20794e+07	2.75326e+07	20585412	2.69905e+07	2.34262e+07	2.71282e+07	1.83971e+07	2.62052e+07	1.94813e+07	2.6504e+07
M0R7M8	Uncharacterized protein OS=Rattus norvegicus OX=10116 PE=4 SV=2	5.85837e+08	6.65872e+08	6.73317e+08	6.01917e+08	5.39615e+08	5.17816e+08	4.74435e+08	4.99048e+08	5.81338e+08	7.38983e+08	7.33498e+08	5.32579e+08	5.72913e+08	6.51082e+08	5.66347e+08
A0A0G2K0V3	3'(2'),5'-bisphosphate nucleotidase 1 OS=Rattus norvegicus OX=10116 GN=Bpnt1 PE=1 SV=1	4.72528e+07	4.69638e+07	4.19495e+07	4.14388e+07	4.15911e+07	4.45707e+07	5.11043e+07	44996556	5.19285e+07	4.40757e+07	3.73565e+07	4.53875e+07	5.05328e+07	3.73011e+07	3.53305e+07
Q1JU68	Eukaryotic translation initiation factor 3 subunit A OS=Rattus norvegicus OX=10116 GN=Eif3a PE=2 SV=2	2.65445e+08	2.87896e+08	2.93675e+08	2.43865e+08	2.62469e+08	2.56526e+08	2.75305e+08	2.95679e+08	2.81367e+08	2.47333e+08	2.42399e+08	2.80252e+08	2.60505e+08	2.81974e+08	2.73837e+08
Q07936	Annexin A2 OS=Rattus norvegicus OX=10116 GN=Anxa2 PE=1 SV=2	1.53285e+08	1.59109e+08	1.90487e+08	5.11802e+08	5.25494e+08	4.54848e+08	1.36273e+08	5.63948e+08	2.87073e+08	1.37855e+08	8.99214e+07	1.58799e+08	1.7205e+08	1.56246e+08	1.68905e+08
A0A0H2UHG0	Tyrosine--tRNA ligase OS=Rattus norvegicus OX=10116 GN=Yars PE=1 SV=1	5.49958e+08	4.28138e+08	4.70841e+08	6.07768e+08	4.6764e+08	4.94342e+08	4.65565e+08	4.75698e+08	4.59153e+08	5.45856e+08	5.11246e+08	5.76492e+08	5.69867e+08	4.76384e+08	4.20951e+08
F1LQG0	Huntingtin-associated protein 1 OS=Rattus norvegicus OX=10116 GN=Hap1 PE=1 SV=1	5.77221e+08	5.22923e+08	5.96053e+08	5.78539e+08	5.90117e+08	5.87687e+08	5.33363e+08	5.0126e+08	3.75938e+08	7.21703e+08	6.08002e+08	5.73294e+08	5.63786e+08	5.20702e+08	5.33361e+08
G3V983	Glutathione S-transferase OS=Rattus norvegicus OX=10116 GN=Gstm1 PE=1 SV=2	726882					6.51331e+06				6.49711e+08	5.25992e+08	6.07159e+08	3.58867e+06
A0A096MK30	Moesin OS=Rattus norvegicus OX=10116 GN=Msn PE=1 SV=1	2.47245e+08	2.76737e+08	2.65225e+08	2.95701e+08	2.2015e+08	2.34808e+08	1.49871e+08	265924546	1.63953e+08	2.61376e+08	1.82508e+08	1.76898e+08	2.40622e+08	2.40365e+08	2.2229e+08
B0BN93	26S proteasome non-ATPase regulatory subunit 13 OS=Rattus norvegicus OX=10116 GN=Psmd13 PE=1 SV=1	4.77594e+08	4.9183e+08	5.13295e+08	5.14851e+08	4.70834e+08	4.32486e+08	4.84261e+08	5.04656e+08	4.4233e+08	5.54145e+08	4.73348e+08	5.28872e+08	5.25518e+08	5.26164e+08	5.09804e+08
P12711	Alcohol dehydrogenase class-3 OS=Rattus norvegicus OX=10116 GN=Adh5 PE=1 SV=2	4.28012e+07	4.30061e+07	4.61632e+07	3.72444e+07	4.08325e+07	4.66548e+07	3.79858e+07	42421608	4.14672e+07	3.8581e+07	3.81865e+07	4.12597e+07	3.38269e+07	3.85444e+07	4.22209e+07
A7VJC2	Heterogeneous nuclear ribonucleoproteins A2/B1 OS=Rattus norvegicus OX=10116 GN=Hnrnpa2b1 PE=1 SV=1	2.49223e+09	2.6599e+09	2.4975e+09	2.36122e+09	2.31357e+09	2.27086e+09	2.5431e+09	2.40215e+09	2.56654e+09	2.44782e+09	2.39252e+09	2.28412e+09	2.52687e+09	2.42361e+09	2.55831e+09
Q68FP1	Gelsolin OS=Rattus norvegicus OX=10116 GN=Gsn PE=1 SV=1	4.19079e+08	4.06091e+08	4.37498e+08	6.1942e+08	5.83811e+08	6.41433e+08	4.36427e+08	593670724	4.18619e+08	4.41691e+08	4.84252e+08	6.84593e+08	4.93946e+08	4.90766e+08	4.23341e+08
P13084	Nucleophosmin OS=Rattus norvegicus OX=10116 GN=Npm1 PE=1 SV=1	7.69134e+08	8.23283e+08	7.98428e+08	7.91671e+08	7.62688e+08	7.39801e+08	8.06721e+08	7.4062e+08	7.24753e+08	9.09241e+08	8.62765e+08	7.89491e+08	8.195e+08	7.49884e+08	8.62158e+08
D3ZJ01	Similar to RIKEN cDNA 2310035C23 OS=Rattus norvegicus OX=10116 GN=Relch PE=1 SV=1	2.50329e+08	2.08014e+08	2.24811e+08	1.86315e+08	2.05655e+08	2.09662e+08	2.39904e+08	1.99602e+08	2.35758e+08	2.6785e+08	2.28664e+08	2.1936e+08	2.50742e+08	2.26339e+08	2.3891e+08
Q9Z2F5	C-terminal-binding protein 1 OS=Rattus norvegicus OX=10116 GN=Ctbp1 PE=1 SV=3	3.97748e+08	3.80353e+08	3.76471e+08	3.66411e+08	3.60952e+08	3.55215e+08	3.71466e+08	3.61548e+08	4.29457e+08	4.16652e+08	3.81462e+08	3.6788e+08	4.03375e+08	3.62945e+08	3.77587e+08
G3V7I0	Peroxiredoxin 3 OS=Rattus norvegicus OX=10116 GN=Prdx3 PE=1 SV=1	5.25636e+08	6.00214e+08	5.85076e+08	5.52947e+08	6.16362e+08	5.75697e+08	5.58907e+08	5.24266e+08	5.83257e+08	6.15827e+08	5.98581e+08	5.5961e+08	6.01941e+08	5.72865e+08	5.45772e+08
D4A5I9	Myosin VI OS=Rattus norvegicus OX=10116 GN=Myo6 PE=1 SV=3	2.31137e+08	2.81545e+08	2.82396e+08	2.68031e+08	2.56099e+08	2.61748e+08	1.97083e+08	2.67873e+08	2.44105e+08	2.69634e+08	2.4196e+08	2.76414e+08	2.72966e+08	2.80495e+08	2.81985e+08
D3ZES7	Plexin A4 OS=Rattus norvegicus OX=10116 GN=Plxna4 PE=4 SV=1	1.51336e+08	1.46556e+08	1.56889e+08	1.42197e+08	1.43538e+08	1.26768e+08	1.4056e+08	142356320	1.37474e+08	1.41912e+08	1.59232e+08	1.61888e+08	1.47504e+08	1.4697e+08	1.6406e+08
Q4V8I9	UTP--glucose-1-phosphate uridylyltransferase OS=Rattus norvegicus OX=10116 GN=Ugp2 PE=1 SV=1	4.78673e+08	5.15473e+08	5.83498e+08	5.57299e+08	5.2552e+08	4.40068e+08	4.3062e+08	536808681	4.43219e+08	4.97167e+08	5.12055e+08	5.17934e+08	5.54554e+08	4.45565e+08	4.91401e+08
A0A0G2JWC7	Fermitin family member 2 OS=Rattus norvegicus OX=10116 GN=Fermt2 PE=1 SV=1	1.66752e+08	1.80932e+08	1.69892e+08	2.02133e+08	1.74217e+08	1.62686e+08	1.89139e+08	2.07859e+08	1.68702e+08	1.80571e+08	1.9933e+08	2.07805e+08	1.87506e+08	1.89666e+08	1.47774e+08
Q9ES21	Phosphatidylinositide phosphatase SAC1 OS=Rattus norvegicus OX=10116 GN=Sacm1l PE=1 SV=1	2.49708e+08	3.27771e+08	3.44712e+08	3.26158e+08	3.45422e+08	2.56315e+08	2.85155e+08	2.80844e+08	2.89431e+08	2.91985e+08	2.73625e+08	3.44005e+08	3.40817e+08	3.08933e+08	2.90604e+08
A0A0G2JYB1	F-actin-capping protein subunit beta OS=Rattus norvegicus OX=10116 GN=Capzb PE=1 SV=1	8.57519e+08	8.31853e+08	8.41139e+08	8.30515e+08	8.35344e+08	7.80214e+08	7.30161e+08	8.27875e+08	8.2285e+08	8.41863e+08	8.42511e+08	8.64572e+08	8.53057e+08	7.8345e+08	8.95273e+08
G3V7L6	26S proteasome regulatory subunit 7 OS=Rattus norvegicus OX=10116 GN=Psmc2 PE=1 SV=1	4.35769e+08	4.1736e+08	4.22965e+08	4.16997e+08	4.33046e+08	4.46605e+08	4.03116e+08	438411123	3.96612e+08	4.4556e+08	4.41262e+08	4.09884e+08	4.68727e+08	4.25083e+08	4.25439e+08
F1M471	EPM2A-interacting protein 1 OS=Rattus norvegicus OX=10116 GN=Epm2aip1 PE=1 SV=3	1.44025e+08	1.5709e+08	1.34341e+08	1.56944e+08	1.52944e+08	1.44415e+08	1.58151e+08	1.50335e+08	1.71761e+08	1.76399e+08	1.41499e+08	1.63062e+08	1.50978e+08	1.77464e+08	1.7337e+08
F1LPG3	Phosphofurin acidic cluster sorting protein 1 OS=Rattus norvegicus OX=10116 GN=Pacs1 PE=1 SV=1	2.25247e+08	2.28637e+08	2.26922e+08	2.49351e+08	2.76575e+08	2.17948e+08	2.17556e+08	2.31287e+08	3.07687e+08	2.53031e+08	2.34146e+08	2.12209e+08	2.28956e+08	2.23814e+08	2.18827e+08
P84083	ADP-ribosylation factor 5 OS=Rattus norvegicus OX=10116 GN=Arf5 PE=1 SV=2	1.36077e+08	1.41306e+08	1.65307e+08	1.41622e+08	1.45362e+08	1.10285e+08	1.19919e+08	1.36879e+08	1.48666e+08	1.35556e+08	1.32555e+08	1.3768e+08	1.45097e+08	1.50423e+08	1.50703e+08
O88767	Protein/nucleic acid deglycase DJ-1 OS=Rattus norvegicus OX=10116 GN=Park7 PE=1 SV=1	2.72733e+09	2.90759e+09	2.86425e+09	2.96106e+09	2.91531e+09	2.7991e+09	2.81837e+09	2.66987e+09	2.84846e+09	2.41742e+09	2.45169e+09	2.49464e+09	2.97268e+09	2.94774e+09	2.82901e+09
P54690	Branched-chain-amino-acid aminotransferase, cytosolic OS=Rattus norvegicus OX=10116 GN=Bcat1 PE=1 SV=1	9.77636e+08	1.05339e+09	9.99732e+08	9.84724e+08	1.02291e+09	9.54055e+08	9.83849e+08	8.76916e+08	9.2543e+08	1.05998e+09	1.15164e+09	1.1038e+09	1.0099e+09	9.42577e+08	9.74057e+08
O35179	Endophilin-A1 OS=Rattus norvegicus OX=10116 GN=Sh3gl2 PE=1 SV=2	1.25403e+09	1.28514e+09	1.31095e+09	1.19904e+09	1.22438e+09	1.20187e+09	1.25956e+09	1.16072e+09	1.51823e+09	1.14135e+09	1.11319e+09	1.12141e+09	1.32767e+09	1.22101e+09	1.23081e+09
P62193	26S proteasome regulatory subunit 4 OS=Rattus norvegicus OX=10116 GN=Psmc1 PE=1 SV=1	2.57492e+08	2.63481e+08	2.62615e+08	1.66103e+08	2.70216e+08	2.51501e+08	2.79999e+08	2.37615e+08	2.78758e+08	2.08896e+08	1.79007e+08	2.58921e+08	2.67386e+08	2.43049e+08	2.46894e+08
P19511	ATP synthase F(0) complex subunit B1, mitochondrial OS=Rattus norvegicus OX=10116 GN=Atp5f1 PE=1 SV=1	2.50937e+09	2.72132e+09	2.78156e+09	2.44215e+09	2.76163e+09	2.67914e+09	2.69216e+09	2.47116e+09	2.52008e+09	2.72327e+09	2.8291e+09	2.56347e+09	2.64945e+09	2.51678e+09	2.71886e+09
Q64303	Serine/threonine-protein kinase PAK 2 OS=Rattus norvegicus OX=10116 GN=Pak2 PE=1 SV=1	1.95706e+08	1.7956e+08	2.02295e+08	1.92939e+08	1.88332e+08	1.75234e+08	1.21889e+08	193247262	1.80135e+08	1.92506e+08	1.99884e+08	1.77591e+08	1.85903e+08	1.67316e+08	1.98117e+08
G3V7S0	Folate hydrolase OS=Rattus norvegicus OX=10116 GN=Folh1 PE=1 SV=1	4.93417e+08	4.73644e+08	4.57165e+08	4.83944e+08	4.96911e+08	4.61661e+08	4.1628e+08	468242787	4.16074e+08	5.48652e+08	5.58908e+08	6.15212e+08	4.92106e+08	4.46384e+08	4.78827e+08
D3ZW08	Adenylosuccinate lyase OS=Rattus norvegicus OX=10116 GN=Adsl PE=1 SV=1	2.57939e+08	2.89077e+08	3.09151e+08	2.51787e+08	2.63329e+08	2.65172e+08	2.91859e+08	2.6842e+08	3.03418e+08	3.00904e+08	2.57379e+08	2.63015e+08	2.77428e+08	2.61327e+08	2.76787e+08
A0A0G2K7Y2	Oxidation resistance protein 1 OS=Rattus norvegicus OX=10116 GN=Oxr1 PE=1 SV=1	4.28057e+08	4.13698e+08	4.65001e+08	4.24214e+08	4.20077e+08	3.69124e+08	4.21816e+08	4.14061e+08	4.90176e+08	3.81236e+08	4.22591e+08	3.98359e+08	4.07827e+08	4.08941e+08	4.07373e+08
A0A140TAI1	Ubiquilin 1, isoform CRA_a OS=Rattus norvegicus OX=10116 GN=Ubqln1 PE=1 SV=1	1.88628e+08	2.07248e+08	1.97755e+08	1.69464e+08	1.75227e+08	1.85114e+08	1.98073e+08	190303071	1.67533e+08	2.17774e+08	1.95624e+08	2.04293e+08	1.89887e+08	1.86587e+08	1.87869e+08
G3V6H5	Mitochondrial 2-oxoglutarate/malate carrier protein OS=Rattus norvegicus OX=10116 GN=Slc25a11 PE=1 SV=1	2.42231e+09	2.53892e+09	2.49317e+09	2.29789e+09	2.33752e+09	2.11331e+09	2.43499e+09	2.31581e+09	2.57746e+09	2.49509e+09	2.37703e+09	2.39278e+09	2.36956e+09	2.24863e+09	2.3214e+09
Q6JE36	Protein NDRG1 OS=Rattus norvegicus OX=10116 GN=Ndrg1 PE=1 SV=1	4.12979e+08	4.08768e+08	4.14726e+08	4.70844e+08	4.47285e+08	4.45391e+08	4.21402e+08	4.47825e+08	3.92698e+08	3.00599e+08	3.31802e+08	4.25242e+08	3.74861e+08	4.16185e+08	4.10743e+08
P63159	High mobility group protein B1 OS=Rattus norvegicus OX=10116 GN=Hmgb1 PE=1 SV=2	6.68867e+08	6.95474e+08	7.42757e+08	7.13644e+08	6.49138e+08	6.76858e+08	6.09661e+08	7.34684e+08	6.721e+08	6.28934e+08	6.1301e+08	6.17459e+08	6.53332e+08	7.17554e+08	6.84539e+08
Q9QYU4	Ketimine reductase mu-crystallin OS=Rattus norvegicus OX=10116 GN=Crym PE=1 SV=1	7.09713e+08	7.58011e+08	9.83766e+08	7.64121e+08	8.11349e+08	6.41571e+08	7.78098e+08	8.5297e+08	9.03602e+08	7.84273e+08	6.99098e+08	7.4288e+08	8.52615e+08	8.19552e+08	1.01783e+09
Q5PPJ6	Leucyl-tRNA synthetase OS=Rattus norvegicus OX=10116 GN=Lars PE=1 SV=1	1.64075e+08	1.82305e+08	1.60833e+08	1.5892e+08	1.74374e+08	1.59965e+08	1.62528e+08	1.68798e+08	1.7467e+08	1.84392e+08	1.74638e+08	1.88384e+08	1.61626e+08	1.62432e+08	1.67217e+08
P24329	Thiosulfate sulfurtransferase OS=Rattus norvegicus OX=10116 GN=Tst PE=1 SV=3	1.19767e+09	1.23698e+09	1.12993e+09	1.11078e+09	1.14552e+09	1.18475e+09	1.12468e+09	1.07257e+09	1.09377e+09	1.2771e+09	1.38006e+09	1.07675e+09	1.30546e+09	1.23529e+09	1.23294e+09
A1L1M0	Protein kinase, cAMP-dependent, catalytic, alpha OS=Rattus norvegicus OX=10116 GN=Prkaca PE=1 SV=1	1.68958e+08	1.78616e+08	1.68791e+08	1.64447e+08	1.75679e+08	1.29328e+08	1.42975e+08	1.63694e+08	1.74782e+08	1.98389e+08	1.61338e+08	1.66858e+08	1.64982e+08	1.60931e+08	1.72489e+08
G3V7U4	Lamin-B1 OS=Rattus norvegicus OX=10116 GN=Lmnb1 PE=1 SV=1	3.37609e+08	3.5006e+08	3.67369e+08	3.83769e+08	3.93837e+08	3.88056e+08	3.92413e+08	375637714	3.45813e+08	3.55019e+08	3.31676e+08	2.97982e+08	3.51831e+08	3.48191e+08	3.82913e+08
P00388	NADPH--cytochrome P450 reductase OS=Rattus norvegicus OX=10116 GN=Por PE=1 SV=3	6.9383e+08	7.33334e+08	6.8871e+08	6.7648e+08	6.45542e+08	6.38225e+08	6.67854e+08	6.7116e+08	6.40833e+08	7.20543e+08	6.45584e+08	7.63258e+08	7.44164e+08	6.98634e+08	7.51811e+08
Q9Z1B2	Glutathione S-transferase Mu 5 OS=Rattus norvegicus OX=10116 GN=Gstm5 PE=1 SV=3	1.22881e+09	1.34911e+09	1.20988e+09	1.12861e+09	1.31982e+09	1.25539e+09	1.2087e+09	1.24355e+09	1.05811e+09	1.40166e+09	1.25966e+09	1.36936e+09	1.19137e+09	1.33819e+09	1.23051e+09
A0A0G2JUI5	Cytoplasmic linker-associated protein 1 OS=Rattus norvegicus OX=10116 GN=Clasp1 PE=1 SV=1	7.85119e+07	9.66063e+07	8.71135e+07	1.01048e+08	6.68027e+07	6.68709e+07	6.79111e+07	6.01066e+07	7.14779e+07	1.08729e+08	1.03155e+08	7.94796e+07	9.73202e+07	9.76274e+07	1.00524e+08
Q5RK08	Glioblastoma amplified sequence OS=Rattus norvegicus OX=10116 GN=Nipsnap2 PE=1 SV=1	3.66337e+09	3.84094e+09	4.33086e+09	4.74969e+09	3.63594e+09	3.26893e+09	3.56969e+09	4221085568	3.84186e+09	4.2998e+09	3.74937e+09	4.32992e+09	4.09e+09	4.3942e+09	4.56387e+09
D3ZEW7	Nitric oxide synthase, brain OS=Rattus norvegicus OX=10116 GN=Nos1 PE=1 SV=2	2.84786e+08	3.58463e+08	3.49952e+08	3.6542e+08	3.14499e+08	2.55889e+08	2.87465e+08	3.31616e+08	2.32757e+08	3.47465e+08	3.1679e+08	2.63066e+08	3.50839e+08	3.5521e+08	3.7256e+08
G3V6Q6	Guanine nucleotide binding protein, alpha 11 OS=Rattus norvegicus OX=10116 GN=Gna11 PE=1 SV=1	2.04362e+08	1.76618e+08	2.19393e+08	1.5979e+08	2.03194e+08	1.8999e+08	1.93624e+08	1.78319e+08	1.69026e+08	2.17009e+08	1.69714e+08	1.9869e+08	2.03174e+08	1.90916e+08	2.25749e+08
Q64605	Receptor-type tyrosine-protein phosphatase S OS=Rattus norvegicus OX=10116 GN=Ptprs PE=1 SV=2	2.477e+07	3.42629e+07	3.35988e+07	2.36447e+07	3.11269e+07	2.79122e+07	2.16712e+07	3.19213e+07	7.15841e+07	4.29693e+07	4.60204e+07	2.12947e+07	4.07195e+07	5.04091e+07	3.98573e+07
F1LV89	Rap1 GTPase-activating protein OS=Rattus norvegicus OX=10116 GN=Rap1gap PE=1 SV=3	1.93427e+08	1.92559e+08	1.74365e+08	1.81856e+08	1.61293e+08	1.4443e+08	1.45962e+08	176284495	1.96368e+08	1.7001e+08	1.6533e+08	1.29768e+08	1.83857e+08	1.79412e+08	1.94323e+08
A0A0G2K502	Malic enzyme OS=Rattus norvegicus OX=10116 GN=Me2 PE=1 SV=1	3.1343e+08	3.14445e+08	2.8678e+08	2.83266e+08	2.96816e+08	2.68111e+08	2.78935e+08	2.94565e+08	2.323e+08	3.31734e+08	2.91663e+08	2.67527e+08	2.71394e+08	3.05612e+08	3.12131e+08
Q68FX1	Mannose-6-phosphate isomerase OS=Rattus norvegicus OX=10116 GN=Mpi PE=2 SV=1	2.39914e+08	2.57876e+08	2.55954e+08	2.52571e+08	2.40056e+08	2.31795e+08	2.6358e+08	2.32033e+08	2.56758e+08	3.04918e+08	2.69833e+08	2.85339e+08	2.57565e+08	2.61123e+08	2.75865e+08
Q6P7A7	Dolichyl-diphosphooligosaccharide--protein glycosyltransferase subunit 1 OS=Rattus norvegicus OX=10116 GN=Rpn1 PE=1 SV=1	6.22534e+08	6.79288e+08	7.1879e+08	6.96147e+08	6.35868e+08	6.25055e+08	6.30097e+08	6.73601e+08	6.699e+08	6.05502e+08	6.29703e+08	5.95315e+08	6.2463e+08	6.62033e+08	6.76017e+08
A0A0G2JSS8	Peroxiredoxin 5, isoform CRA_c OS=Rattus norvegicus OX=10116 GN=Prdx5 PE=1 SV=1	2.32716e+09	2.14465e+09	1.98122e+09	2.31983e+09	2.29084e+09	2.28089e+09	2.35275e+09	2.26932e+09	2.29087e+09	2.44478e+09	2.39476e+09	2.43787e+09	2.21285e+09	2.32603e+09	2.35417e+09
G3V9U2	3-ketoacyl-CoA thiolase, mitochondrial OS=Rattus norvegicus OX=10116 GN=Acaa2 PE=1 SV=3	5.05735e+08	5.12556e+08	5.64124e+08	4.97077e+08	5.12305e+08	5.27979e+08	4.78125e+08	5.1532e+08	3.72647e+08	4.07816e+08	4.71662e+08	4.19277e+08	5.0683e+08	4.28943e+08	5.95643e+08
A0A0G2JSZ5	Protein disulfide-isomerase A6 OS=Rattus norvegicus OX=10116 GN=Pdia6 PE=1 SV=1	4.666e+08	4.20553e+08	4.81088e+08	5.06301e+08	4.49032e+08	4.92618e+08	4.66554e+08	478198722	3.98905e+08	5.77638e+08	4.80561e+08	4.79981e+08	4.67571e+08	4.71941e+08	4.7634e+08
D3ZAS2	Small G protein-signaling modulator 1 OS=Rattus norvegicus OX=10116 GN=Sgsm1 PE=1 SV=2	2.73031e+08	2.69622e+08	3.06081e+08	2.58985e+08	2.58834e+08	2.49825e+08	2.44417e+08	2.58397e+08	2.19974e+08	3.10505e+08	2.76792e+08	2.58243e+08	2.73306e+08	2.58421e+08	2.80588e+08
A0A0G2JY08	Myosin XVIIIa OS=Rattus norvegicus OX=10116 GN=Myo18a PE=1 SV=1	1.6475e+08	1.65763e+08	1.65343e+08	1.40194e+08	1.64968e+08	1.50112e+08	1.56562e+08	1.55416e+08	1.56922e+08	1.27283e+08	1.70011e+08	1.51237e+08	1.41565e+08	1.69646e+08	1.56578e+08
A0A0G2K459	Mitochondrial carrier 2 OS=Rattus norvegicus OX=10116 GN=Mtch2 PE=1 SV=1	9.93324e+08	1.07341e+09	1.11626e+09	1.04505e+09	9.48996e+08	1.0178e+09	1.0134e+09	9.58526e+08	1.07313e+09	9.51218e+08	9.41774e+08	9.5768e+08	1.02937e+09	9.82933e+08	1.04179e+09
B2RYG6	Ubiquitin thioesterase OTUB1 OS=Rattus norvegicus OX=10116 GN=Otub1 PE=1 SV=1	1.37514e+09	1.37002e+09	1.35111e+09	1.32353e+09	1.32536e+09	1.22742e+09	1.33038e+09	1229075233	1.36583e+09	1.47366e+09	1.3923e+09	1.35376e+09	1.38675e+09	1.2727e+09	1.31705e+09
P07895	Superoxide dismutase [Mn], mitochondrial OS=Rattus norvegicus OX=10116 GN=Sod2 PE=1 SV=2	2.58652e+09	2.63481e+09	2.98379e+09	2.63543e+09	2.49971e+09	2.4835e+09	2.38698e+09	2.58476e+09	2.53032e+09	2.62168e+09	2.58335e+09	2.54702e+09	2.81283e+09	2.69322e+09	2.78757e+09
Q7TQ90	Ac1002 OS=Rattus norvegicus OX=10116 GN=Adh4 PE=1 SV=1
P19804	Nucleoside diphosphate kinase B OS=Rattus norvegicus OX=10116 GN=Nme2 PE=1 SV=1	1.15417e+09	1.19952e+09	1.16463e+09	1.09994e+09	1.15768e+09	1.06849e+09	1.13115e+09	1098680766	1.09822e+09	1.33337e+09	1.17897e+09	1.15245e+09	1.19908e+09	1.09405e+09	1.25367e+09
D3ZDH8	Septin 5, isoform CRA_d OS=Rattus norvegicus OX=10116 GN=Sept5 PE=1 SV=1	4.36978e+07	3.89446e+07	3.96903e+07	4.4046e+07	3.97317e+07	3.86112e+07	4.42418e+07	38264948	7.48457e+07	2.89479e+07	2.74995e+07	2.13399e+07	4.04418e+07	3.83465e+07	3.96085e+07
D3ZG43	NADH dehydrogenase (Ubiquinone) Fe-S protein 3 (Predicted), isoform CRA_c OS=Rattus norvegicus OX=10116 GN=Ndufs3 PE=1 SV=1	5.98048e+08	6.66447e+08	6.52915e+08	6.40372e+08	6.34263e+08	6.74206e+08	6.34797e+08	6.10829e+08	6.45061e+08	9.22601e+08	6.46519e+08	6.39203e+08	6.33449e+08	6.0934e+08	6.53979e+08
B4F774	Ganglioside-induced differentiation-associated protein 1-like 1 OS=Rattus norvegicus OX=10116 GN=Gdap1l1 PE=2 SV=1	3.41859e+08	3.6192e+08	3.69267e+08	3.37753e+08	3.33893e+08	3.14541e+08	3.48083e+08	3.20762e+08	3.63114e+08	3.7298e+08	3.72738e+08	3.57639e+08	3.60941e+08	4.24176e+08	3.50683e+08
P46844	Biliverdin reductase A OS=Rattus norvegicus OX=10116 GN=Blvra PE=1 SV=1				1.13361e+08		1.14773e+08							1.13414e+08		1.13751e+08
P41562	Isocitrate dehydrogenase [NADP] cytoplasmic OS=Rattus norvegicus OX=10116 GN=Idh1 PE=1 SV=1	8.32195e+08	8.57072e+08	8.35816e+08	8.27365e+08	7.98698e+08	8.49253e+08	8.15277e+08	847253366	7.05453e+08	8.2565e+08	7.89508e+08	7.54849e+08	8.36804e+08	7.73492e+08	8.57111e+08
P04905	Glutathione S-transferase Mu 1 OS=Rattus norvegicus OX=10116 GN=Gstm1 PE=1 SV=2
Q63570	26S proteasome regulatory subunit 6B OS=Rattus norvegicus OX=10116 GN=Psmc4 PE=1 SV=1	2.89029e+08	2.95455e+08	2.96267e+08	3.09875e+08	2.58199e+08	3.24061e+08	3.00756e+08	3.23783e+08	2.67623e+08	3.38522e+08	3.42329e+08	3.23785e+08	2.83041e+08	2.7333e+08	2.86122e+08
Q9WU70	Syntaxin-binding protein 5 OS=Rattus norvegicus OX=10116 GN=Stxbp5 PE=1 SV=1	1.87043e+08	1.9377e+08	1.79051e+08	1.63756e+08	1.67492e+08	1.71542e+08	1.92954e+08	1.71267e+08	1.68529e+08	1.85993e+08	1.84157e+08	2.20266e+08	2.04416e+08	1.77751e+08	1.79568e+08
P85968	6-phosphogluconate dehydrogenase, decarboxylating OS=Rattus norvegicus OX=10116 GN=Pgd PE=1 SV=1	8.376e+08	8.85172e+08	9.19148e+08	8.94631e+08	8.80071e+08	8.20135e+08	9.13071e+08	958546819	8.01064e+08	8.89538e+08	8.04821e+08	8.89426e+08	8.19632e+08	8.76948e+08	9.13987e+08
B0BMW4	GNAS complex locus OS=Rattus norvegicus OX=10116 GN=Gnas PE=2 SV=1	5.74636e+07	5.31924e+07	5.61471e+07		6.05768e+07	5.61784e+07	5.0557e+07	49416680	4.38704e+07	6.50989e+07	5.5548e+07	4.92273e+07	6.32397e+07	5.196e+07	6.53709e+07
Q6P3V9	60S ribosomal protein L4 OS=Rattus norvegicus OX=10116 GN=Rpl4 PE=1 SV=1	7.57901e+08	7.51843e+08	7.28126e+08	7.08066e+08	7.22704e+08	6.66085e+08	7.25028e+08	727536904	6.91277e+08	7.66246e+08	7.34293e+08	7.43827e+08	7.21476e+08	6.87727e+08	6.77976e+08
Q5FVJ0	Protein RUFY3 OS=Rattus norvegicus OX=10116 GN=Rufy3 PE=1 SV=1	7.78421e+08	7.786e+08	8.162e+08	7.60357e+08	7.77439e+08	7.99019e+08	6.96727e+08	7.21575e+08	7.23787e+08	9.85248e+08	7.52925e+08	7.6396e+08	7.73425e+08	7.56288e+08	7.87204e+08
M0RD40	SIK family kinase 3 OS=Rattus norvegicus OX=10116 GN=Sik3 PE=1 SV=2	1.85781e+08	1.81655e+08	1.84258e+08	1.69595e+08	1.9077e+08	1.7159e+08	1.97459e+08	1.64841e+08	1.97254e+08	1.98909e+08	2.12166e+08	1.9777e+08	1.91771e+08	1.65551e+08	1.84517e+08
Q80W89	NADH dehydrogenase [ubiquinone] 1 alpha subcomplex subunit 11 OS=Rattus norvegicus OX=10116 GN=Ndufa11 PE=2 SV=1	3.66339e+08	4.1979e+08	3.74445e+08	3.22589e+08	3.80185e+08	2.98196e+08	3.49418e+08	3.70107e+08	3.92369e+08	3.69625e+08	3.80285e+08	3.32106e+08	3.8923e+08	3.52022e+08	3.89526e+08
W8BZ34	DDX3Y OS=Rattus norvegicus OX=10116 GN=DDX3Y PE=3 SV=1	2.93006e+07	3.36484e+07	3.25467e+07	3.31183e+07	3.05365e+07	2.93838e+07	1.94684e+07	30671306	3.06621e+07	3.03196e+07	2.89302e+07	2.18753e+07	3.11014e+07	2.36714e+07	2.7948e+07
P51583	Multifunctional protein ADE2 OS=Rattus norvegicus OX=10116 GN=Paics PE=1 SV=3	3.98703e+08	4.17396e+08	3.74729e+08	3.78854e+08	3.68376e+08	3.46404e+08	3.55314e+08	3.94643e+08	3.17574e+08	4.185e+08	3.84081e+08	4.1436e+08	3.70637e+08	3.85844e+08	4.07722e+08
D3ZWA8	Adaptor protein, phosphotyrosine-interacting with PH domain and leucine zipper 1 OS=Rattus norvegicus OX=10116 GN=Appl1 PE=1 SV=3	2.39514e+08	2.53036e+08	2.26868e+08	2.37115e+08	2.27241e+08	2.15316e+08	2.33932e+08	2.20582e+08	2.26683e+08	2.28802e+08	2.29059e+08	2.01577e+08	2.32785e+08	2.17302e+08	2.83609e+08
P37285	Kinesin light chain 1 OS=Rattus norvegicus OX=10116 GN=Klc1 PE=1 SV=2	2.59059e+08	3.30266e+08	2.54784e+08	2.33353e+08	3.3349e+08	2.27146e+08	2.48345e+08	2.58894e+08	2.53256e+08	2.25687e+08	2.29389e+08	1.7713e+08	2.42463e+08	2.71206e+08	2.45244e+08
O35112	CD166 antigen OS=Rattus norvegicus OX=10116 GN=Alcam PE=1 SV=1	5.58848e+08	5.15494e+08	5.21559e+08	5.37036e+08	6.66632e+08	4.04416e+08	5.21331e+08	6.27165e+08	6.8757e+08	5.46394e+08	4.91993e+08	4.56141e+08	5.30116e+08	5.19802e+08	5.33676e+08
Q6AZ33	Biliverdin reductase A OS=Rattus norvegicus OX=10116 GN=Blvra PE=1 SV=1										5.23238e+07	4.59912e+07	5.50373e+07
P15791	Calcium/calmodulin-dependent protein kinase type II subunit delta OS=Rattus norvegicus OX=10116 GN=Camk2d PE=1 SV=1	3.8918e+08	3.83092e+08	3.84189e+08	4.41269e+08	4.48084e+08	4.50092e+08	3.74689e+08	3.3008e+08	4.78617e+08	5.46765e+08	5.09551e+08	5.00326e+08	4.21824e+08	4.27776e+08	3.54504e+08
P40329	Arginine--tRNA ligase, cytoplasmic OS=Rattus norvegicus OX=10116 GN=Rars PE=1 SV=2	4.37829e+08	4.85646e+08	4.16509e+08	4.37255e+08	4.8048e+08	3.45525e+08	4.85306e+08	413980693	4.37912e+08	4.95646e+08	4.21273e+08	5.34402e+08	4.44957e+08	4.8553e+08	4.75007e+08
P19627	Guanine nucleotide-binding protein G(z) subunit alpha OS=Rattus norvegicus OX=10116 GN=Gnaz PE=2 SV=3	5.91688e+08	5.96463e+08	6.65769e+08	5.51678e+08	5.98395e+08	5.17654e+08	6.46055e+08	624610353	6.53707e+08	6.24989e+08	5.38242e+08	5.70216e+08	6.47151e+08	6.18551e+08	6.6948e+08
A0A0G2K2L8	Peripheral plasma membrane protein CASK-like OS=Rattus norvegicus OX=10116 GN=LOC100910506 PE=1 SV=1	2.99169e+08	2.95564e+08	3.21104e+08	2.91597e+08	2.57753e+08	2.4337e+08	2.59584e+08	2.77787e+08	2.8792e+08	3.0332e+08	2.95082e+08	2.58257e+08	2.99818e+08	2.93694e+08	2.76466e+08
P97710	Tyrosine-protein phosphatase non-receptor type substrate 1 OS=Rattus norvegicus OX=10116 GN=Sirpa PE=1 SV=1	8.6132e+08	8.19298e+08	8.81378e+08	9.41667e+08	8.47987e+08	8.48948e+08	8.16861e+08	7.68605e+08	9.65892e+08	6.80319e+08	6.37776e+08	6.38868e+08	8.97255e+08	8.11646e+08	8.57454e+08
A0A0G2K051	Early endosome antigen 1 OS=Rattus norvegicus OX=10116 GN=Eea1 PE=1 SV=1	1.12481e+08	1.42665e+08	9.77145e+07	1.74505e+08	1.47955e+08	1.48272e+08	1.22884e+08	1.36828e+08	1.22153e+08	1.46579e+08	1.42661e+08	1.45403e+08	1.47044e+08	1.37088e+08	1.34772e+08
D3ZFX4	Phosphoacetylglucosamine mutase OS=Rattus norvegicus OX=10116 GN=Pgm3 PE=1 SV=1	3.68861e+08	4.01469e+08	4.11648e+08	3.9042e+08	3.61286e+08	3.56428e+08	3.78484e+08	3.78979e+08	3.24044e+08	3.74905e+08	3.41254e+08	3.90151e+08	3.63859e+08	3.68857e+08	3.75796e+08
F1LQ55	Non-specific lipid-transfer protein OS=Rattus norvegicus OX=10116 GN=Scp2 PE=1 SV=3	5.93488e+08	6.14414e+08	5.84325e+08	5.64494e+08	5.22141e+08	5.61828e+08	6.22051e+08	577429032	5.09463e+08	6.25875e+08	6.56843e+08	6.61348e+08	5.29515e+08	5.98899e+08	6.41293e+08
Q05982	Nucleoside diphosphate kinase A OS=Rattus norvegicus OX=10116 GN=Nme1 PE=1 SV=1	9.17458e+08	9.15979e+08	9.07686e+08	8.35833e+08	8.61289e+08	9.00475e+08	8.38558e+08	8.31786e+08	8.73576e+08	4.14459e+08	3.75943e+08	3.68732e+08	8.65394e+08	8.54747e+08	8.78153e+08
A0A0G2KA27	MAP kinase-activating death domain protein OS=Rattus norvegicus OX=10116 GN=Madd PE=1 SV=1	2.50358e+08	2.52307e+08	2.11133e+08	2.5258e+08	2.94636e+08	2.2314e+08	2.43782e+08	2.29673e+08	2.7195e+08	2.76406e+08	2.48366e+08	2.4671e+08	2.24455e+08	2.34861e+08	2.56689e+08
O08629	Transcription intermediary factor 1-beta OS=Rattus norvegicus OX=10116 GN=Trim28 PE=1 SV=2	3.52458e+08	3.597e+08	3.58661e+08	3.4947e+08	3.28161e+08	3.23291e+08	3.65839e+08	3.33641e+08	2.97796e+08	3.70018e+08	3.29957e+08	3.11959e+08	3.55791e+08	3.15963e+08	3.67297e+08
Q5RKJ9	RAB10, member RAS oncogene family OS=Rattus norvegicus OX=10116 GN=Rab10 PE=1 SV=1	4.91831e+08	5.09473e+08	4.99869e+08	6.78571e+08	6.21086e+08	6.87845e+08	4.80955e+08	4.86599e+08	5.04241e+08	7.56559e+08	7.12551e+08	8.28163e+08	5.07543e+08	6.12517e+08	4.83721e+08
Q6P6U2	26S proteasome regulatory subunit 6A OS=Rattus norvegicus OX=10116 GN=Psmc3 PE=1 SV=1	3.51857e+08	3.35361e+08	3.41293e+08	3.31711e+08	2.96354e+08	3.22453e+08	3.26119e+08	3.24242e+08	3.06431e+08	3.52143e+08	3.20673e+08	3.02283e+08	3.42338e+08	3.11858e+08	2.84653e+08
P20651	Serine/threonine-protein phosphatase 2B catalytic subunit beta isoform OS=Rattus norvegicus OX=10116 GN=Ppp3cb PE=1 SV=1	3.36395e+08	3.6622e+08	3.7454e+08	3.37078e+08	3.34096e+08	2.93823e+08	3.33867e+08	3.06889e+08	3.68063e+08	3.68042e+08	3.3795e+08	3.41519e+08	3.52829e+08	3.30904e+08	3.60787e+08
P63329	Serine/threonine-protein phosphatase 2B catalytic subunit alpha isoform OS=Rattus norvegicus OX=10116 GN=Ppp3ca PE=1 SV=1	6.40215e+08	6.35637e+08	6.55203e+08	6.21401e+08	6.45319e+08	5.86455e+08	6.49146e+08	616403240	1.04187e+09	6.63388e+08	6.46176e+08	6.11741e+08	6.38176e+08	7.19322e+08	6.07557e+08
F1M7Q5	AMP deaminase OS=Rattus norvegicus OX=10116 GN=Ampd3 PE=1 SV=2	2.38199e+08	2.83315e+08	2.70123e+08	2.61563e+08	2.89029e+08	2.48827e+08	2.51348e+08	2.68281e+08	1.94421e+08	3.45003e+08	3.15529e+08	3.61675e+08	2.75217e+08	2.57906e+08	2.79107e+08
Q6PDW4	Proteasome subunit beta type OS=Rattus norvegicus OX=10116 GN=Psmb1 PE=1 SV=1	5.11671e+08	4.88637e+08	4.78397e+08	4.72025e+08	4.34523e+08	4.58996e+08	4.85119e+08	4.81501e+08	4.61637e+08	5.24351e+08	4.91199e+08	4.30302e+08	4.72538e+08	4.48935e+08	4.48851e+08
O35263	Platelet-activating factor acetylhydrolase IB subunit gamma OS=Rattus norvegicus OX=10116 GN=Pafah1b3 PE=2 SV=1	3.72034e+08	3.69293e+08	4.45299e+08	3.80931e+08	3.80943e+08	3.2229e+08	3.84542e+08	3.73667e+08	2.61912e+08	4.27216e+08	3.95128e+08	3.71598e+08	4.09108e+08	4.0769e+08	3.98484e+08
D4A5X7	Ganglioside-induced differentiation-associated-protein 1 OS=Rattus norvegicus OX=10116 GN=Gdap1 PE=4 SV=1	4.39723e+08	4.03895e+08	3.7693e+08	3.61257e+08	3.58058e+08	3.29744e+08	4.23231e+08	4.01211e+08	4.04585e+08	4.01155e+08	4.13187e+08	5.02381e+08	3.76546e+08	4.16553e+08	4.51956e+08
O08618	Phosphoribosyl pyrophosphate synthase-associated protein 2 OS=Rattus norvegicus OX=10116 GN=Prpsap2 PE=1 SV=1	1.41102e+08	2.05989e+08	1.90699e+08	1.39212e+08	2.43493e+08	1.35995e+08	1.86335e+08	2.03562e+08	1.35602e+08	1.90981e+08	1.58972e+08	1.80242e+08	1.91751e+08	1.89129e+08	2.32911e+08
Q6AYI1	DEAD (Asp-Glu-Ala-Asp) box polypeptide 5 OS=Rattus norvegicus OX=10116 GN=Ddx5 PE=1 SV=1	3.804e+08	3.9263e+08	3.88674e+08	3.69207e+08	3.56627e+08	3.36093e+08	3.27306e+08	379846150	4.29593e+08	3.96364e+08	3.88293e+08	3.41977e+08	3.76524e+08	3.67926e+08	3.81588e+08
A0A0G2JVB6	Syntaxin-12 OS=Rattus norvegicus OX=10116 GN=Stx12 PE=1 SV=1	2.89028e+08	2.56121e+08	3.35459e+08	2.79469e+08	2.04886e+08	2.75015e+08	2.34628e+08	2.7301e+08	3.21583e+08	2.89732e+08	2.65112e+08	1.45262e+08	3.28204e+08	3.10806e+08	2.64762e+08
Q5U318	Astrocytic phosphoprotein PEA-15 OS=Rattus norvegicus OX=10116 GN=Pea15 PE=1 SV=1	1.33541e+09	1.36836e+09	1.17779e+09	1.22326e+09	1.2179e+09	1.2386e+09	1.39913e+09	1.20951e+09	1.20471e+09	1.44847e+09	1.34969e+09	1.30113e+09	1.34008e+09	1.30774e+09	1.29762e+09
D4ACG7	Copine 6 OS=Rattus norvegicus OX=10116 GN=Cpne6 PE=1 SV=2	3.52907e+08	3.78092e+08	4.04263e+08	3.69705e+08	3.72337e+08	3.57915e+08	3.78895e+08	3.44327e+08	3.7446e+08	3.90048e+08	3.91169e+08	3.49348e+08	4.03835e+08	3.62992e+08	3.87226e+08
M0R6K0	Laminin subunit beta-2 OS=Rattus norvegicus OX=10116 GN=Lamb2 PE=1 SV=1	7.27123e+07	1.25637e+08	7.28544e+07	7.78074e+07	1.75927e+08	1.08145e+08	5.51679e+07	1.15204e+08	6.29406e+07	1.12197e+08	1.12354e+08	1.04818e+08	5.71826e+07	6.59592e+07	5.75438e+07
B2RYN6	AP-1 complex subunit gamma OS=Rattus norvegicus OX=10116 GN=Ap1g1 PE=2 SV=1	5.56617e+08	5.61133e+08	5.20936e+08	5.23205e+08	4.59275e+08	5.32501e+08	5.42289e+08	4.92478e+08	4.6789e+08	5.49827e+08	4.8555e+08	5.51835e+08	6.04029e+08	4.86737e+08	5.7356e+08
P62762	Visinin-like protein 1 OS=Rattus norvegicus OX=10116 GN=Vsnl1 PE=1 SV=2	2.09456e+09	2.19911e+09	2.0137e+09	2.24533e+09	2.54862e+09	2.47659e+09	2.25408e+09	1.96704e+09	2.0298e+09	2.98678e+09	2.92319e+09	2.77629e+09	2.29973e+09	2.04251e+09	2.15736e+09
A8WCF8	Tumor protein p63-regulated gene 1-like protein OS=Rattus norvegicus OX=10116 GN=Tprg1l PE=1 SV=1	4.07626e+08	4.52264e+08	3.81036e+08	4.02821e+08	4.0467e+08	3.7338e+08	4.21999e+08	3.88777e+08	4.18708e+08	4.43942e+08	3.55834e+08	3.1937e+08	4.5673e+08	3.55868e+08	3.77759e+08
A0A0G2JWX1	26S proteasome non-ATPase regulatory subunit 11 OS=Rattus norvegicus OX=10116 GN=Psmd11 PE=1 SV=1	3.56825e+08	3.61851e+08	3.24774e+08	3.43868e+08	3.53932e+08	3.1527e+08	3.49118e+08	3.48923e+08	3.37534e+08	3.68506e+08	3.23519e+08	3.50401e+08	3.4064e+08	3.40148e+08	3.59071e+08
Q63803	Guanine nucleotide-binding protein G(s) subunit alpha isoforms XLas OS=Rattus norvegicus OX=10116 GN=Gnas PE=1 SV=3	4.29365e+07	4.08817e+07	4.45265e+07	3.42967e+07	4.32785e+07	4.09483e+07	4.56542e+07	46959424	6.93187e+07	3.82334e+07	3.64374e+07	2.93488e+07	4.27659e+07	3.54318e+07	4.18926e+07
Q63965	Sideroflexin-1 OS=Rattus norvegicus OX=10116 GN=Sfxn1 PE=2 SV=4	7.40505e+07	7.23962e+07	8.43556e+07	6.31161e+07	7.65119e+07	7.42919e+07	6.87038e+07	57462228	7.40451e+07	9.68047e+07	7.44161e+07	6.7992e+07	8.43575e+07	7.40589e+07	7.38348e+07
F1LN92	AFG3-like matrix AAA peptidase subunit 2 OS=Rattus norvegicus OX=10116 GN=Afg3l2 PE=1 SV=1	4.91175e+08	4.65377e+08	5.16403e+08	4.76891e+08	4.95553e+08	4.57802e+08	4.43789e+08	4.44882e+08	4.44672e+08	5.10562e+08	5.29766e+08	4.43723e+08	4.88195e+08	4.98691e+08	5.27921e+08
Q5HZV9	Protein phosphatase 1 regulatory subunit 7 OS=Rattus norvegicus OX=10116 GN=Ppp1r7 PE=1 SV=1	3.02234e+08	3.34959e+08	3.08156e+08	3.11548e+08	3.06832e+08	2.93585e+08	3.26962e+08	3.09114e+08	3.905e+08	2.9364e+08	3.00488e+08	3.33183e+08	3.3388e+08	3.26805e+08	3.39892e+08
P35571	Glycerol-3-phosphate dehydrogenase, mitochondrial OS=Rattus norvegicus OX=10116 GN=Gpd2 PE=1 SV=1	3.42818e+08	3.61762e+08	3.70371e+08	3.38869e+08	3.30132e+08	2.82933e+08	3.72018e+08	3.5404e+08	3.40715e+08	3.68018e+08	3.25307e+08	3.72486e+08	3.70704e+08	3.56903e+08	3.86601e+08
P63012	Ras-related protein Rab-3A OS=Rattus norvegicus OX=10116 GN=Rab3a PE=1 SV=1	2.01886e+09	2.10886e+09	2.23205e+09	2.06625e+09	2.13602e+09	1.96067e+09	2.01572e+09	1922148753	2.62431e+09	2.22941e+09	2.13554e+09	1.81964e+09	2.06172e+09	2.02065e+09	2.22887e+09
A0A0G2JSR0	Voltage-dependent anion-selective channel protein 3 OS=Rattus norvegicus OX=10116 GN=Vdac3 PE=1 SV=1	2.56963e+09	2.31062e+09	2.36616e+09	2.50231e+09	2.598e+09	2.05047e+09	2.67415e+09	2267344402	2.59786e+09	2.71439e+09	2.51704e+09	2.66572e+09	2.66411e+09	2.311e+09	2.57835e+09
G3V804	Sideroflexin OS=Rattus norvegicus OX=10116 GN=Sfxn3 PE=1 SV=1	4.41721e+08	4.48435e+08	4.45926e+08	3.83511e+08	4.24527e+08	3.93819e+08	3.50752e+08	424834562	4.57824e+08	4.07672e+08	4.22088e+08	3.8383e+08	4.70878e+08	5.12585e+08	4.46386e+08
O55096	Dipeptidyl peptidase 3 OS=Rattus norvegicus OX=10116 GN=Dpp3 PE=1 SV=2	2.13525e+08	2.21876e+08	2.14214e+08	2.1675e+08	2.12951e+08	2.16666e+08	2.31705e+08	2.32166e+08	2.13986e+08	2.19567e+08	2.27403e+08	2.46088e+08	2.28416e+08	1.9765e+08	2.24536e+08
A0A0G2K872	Cell adhesion molecule 3 OS=Rattus norvegicus OX=10116 GN=Cadm3 PE=1 SV=1	5.91507e+08	5.73923e+08	5.688e+08	5.38157e+08	5.48813e+08	5.44755e+08	5.50724e+08	521559854	5.19615e+08	6.00161e+08	5.4847e+08	5.09004e+08	5.98608e+08	5.50197e+08	5.75485e+08
Q4V7C6	GMP synthase [glutamine-hydrolyzing] OS=Rattus norvegicus OX=10116 GN=Gmps PE=1 SV=1	1.48055e+08	1.46032e+08	1.54394e+08	1.26897e+08	1.29119e+08	1.28175e+08	1.59083e+08	1.37274e+08	1.34167e+08	1.52125e+08	1.57558e+08	1.48504e+08	1.37679e+08	1.24485e+08	1.42708e+08
Q6AYK6	Calcyclin-binding protein OS=Rattus norvegicus OX=10116 GN=Cacybp PE=1 SV=1	2.41603e+08	2.77716e+08	2.55728e+08	2.12489e+08	2.48993e+08	2.29406e+08	1.9797e+08	199368568	1.80288e+08	3.90423e+08	2.60563e+08	3.4775e+08	2.54851e+08	2.81157e+08	2.95385e+08
P20788	Cytochrome b-c1 complex subunit Rieske, mitochondrial OS=Rattus norvegicus OX=10116 GN=Uqcrfs1 PE=1 SV=2	1.10617e+09	1.13202e+09	1.09923e+09	1.0983e+09	1.11185e+09	1.03295e+09	9.21388e+08	1069731452	1.30659e+09	1.08033e+09	1.17172e+09	1.27784e+09	1.13035e+09	1.04399e+09	9.14722e+08
D4AE96	Importin 7 OS=Rattus norvegicus OX=10116 GN=Ipo7 PE=1 SV=1	1.51378e+08	1.74679e+08	1.67347e+08	1.50354e+08	1.56712e+08	1.292e+08	1.53316e+08	1.40543e+08	1.43195e+08	1.76276e+08	1.71439e+08	1.5188e+08	1.6321e+08	1.50247e+08	1.65861e+08
D3ZEI4	Hepatocyte cell adhesion molecule OS=Rattus norvegicus OX=10116 GN=Hepacam PE=1 SV=2	5.70919e+08	6.10255e+08	5.73438e+08	5.48993e+08	5.24294e+08	5.7413e+08	5.90989e+08	5.54439e+08	5.17801e+08	4.81113e+08	5.1058e+08	5.15269e+08	5.73304e+08	5.58069e+08	5.6552e+08
Q6AYN4	Phytanoyl-CoA hydroxylase-interacting protein-like OS=Rattus norvegicus OX=10116 GN=Phyhipl PE=1 SV=2	9.03969e+08	9.05395e+08	9.48886e+08	8.13827e+08	7.57445e+08	8.39645e+08	9.54941e+08	8.54518e+08	8.38113e+08	7.98525e+08	8.19097e+08	7.9689e+08	8.54835e+08	8.76687e+08	9.3358e+08
F1LP76	Elongator complex protein 1 OS=Rattus norvegicus OX=10116 GN=Elp1 PE=1 SV=2	2.24288e+08	2.20588e+08	2.25015e+08	2.16244e+08	2.37158e+08	2.09283e+08	2.15147e+08	2.25932e+08	1.76663e+08	2.20029e+08	2.06715e+08	1.97686e+08	2.03409e+08	2.05624e+08	2.21063e+08
B1WC34	Protein kinase C substrate 80K-H OS=Rattus norvegicus OX=10116 GN=Prkcsh PE=1 SV=1	3.71004e+08	4.06019e+08	4.15325e+08	4.90394e+08	3.80807e+08	4.51724e+08	3.75245e+08	444707526	3.39701e+08	4.8059e+08	4.37346e+08	4.70313e+08	3.70563e+08	4.05408e+08	4.21599e+08
P13638	Sodium/potassium-transporting ATPase subunit beta-2 OS=Rattus norvegicus OX=10116 GN=Atp1b2 PE=1 SV=1	2.62163e+09	2.81064e+09	2.85672e+09	2.60476e+09	2.52962e+09	2.51585e+09	2.6406e+09	2.58073e+09	2.07977e+09	2.1913e+09	2.62624e+09	2.54133e+09	2.64131e+09	2.45108e+09	2.77523e+09
P55053	Fatty acid-binding protein 5 OS=Rattus norvegicus OX=10116 GN=Fabp5 PE=1 SV=3	1.03833e+09	1.12424e+09	1.02119e+09	1.10924e+09	1.00982e+09	1.07328e+09	1.1018e+09	1175876596	9.24105e+08	1.02097e+09	1.01542e+09	1.14347e+09	1.03181e+09	1.03129e+09	1.0417e+09
P20070	NADH-cytochrome b5 reductase 3 OS=Rattus norvegicus OX=10116 GN=Cyb5r3 PE=1 SV=2	4.52635e+08	4.92407e+08	4.58769e+08	4.6465e+08	4.5149e+08	4.64905e+08	4.32357e+08	467405284	4.11355e+08	4.52905e+08	4.07514e+08	4.06804e+08	4.43929e+08	4.46523e+08	4.3872e+08
A0JPJ7	Obg-like ATPase 1 OS=Rattus norvegicus OX=10116 GN=Ola1 PE=2 SV=1	6.72238e+08	6.55926e+08	6.76908e+08	4.23089e+08	4.83609e+08	4.25578e+08	6.36087e+08	627025894	4.4905e+08	5.1082e+08	4.37715e+08	4.98209e+08	4.55292e+08	4.01309e+08	6.63247e+08
P14925	Peptidyl-glycine alpha-amidating monooxygenase OS=Rattus norvegicus OX=10116 GN=Pam PE=1 SV=1	3.8354e+08	3.46001e+08	3.61693e+08	3.55049e+08	3.00809e+08	3.3879e+08	3.79008e+08	3.46369e+08	2.30918e+08	3.84796e+08	2.98615e+08	2.81329e+08	3.35349e+08	3.26546e+08	3.381e+08
Q8VD52	Pyridoxal phosphate phosphatase OS=Rattus norvegicus OX=10116 GN=Pdxp PE=1 SV=2	8.50572e+08	8.50588e+08	8.74927e+08	8.2154e+08	8.0564e+08	7.54718e+08	8.19229e+08	7.54698e+08	7.48943e+08	8.7983e+08	7.55107e+08	7.44677e+08	8.67779e+08	8.3731e+08	8.9911e+08
Q3T1J1	Eukaryotic translation initiation factor 5A-1 OS=Rattus norvegicus OX=10116 GN=Eif5a PE=1 SV=3	5.06403e+08	5.02373e+08	5.01011e+08	4.36694e+08	4.96976e+08	4.71052e+08	4.90211e+08	5.04088e+08	5.58057e+08	5.60526e+08	5.5869e+08	5.28749e+08	4.6882e+08	4.43382e+08	4.78531e+08
M0R5P8	ADAM metallopeptidase domain 22 OS=Rattus norvegicus OX=10116 GN=Adam22 PE=1 SV=2	1.73158e+08	1.64457e+08	1.82564e+08	1.63073e+08	1.80456e+08	1.28909e+08	1.5982e+08	161355558	1.66241e+08	1.62371e+08	1.56449e+08	1.67468e+08	1.59119e+08	1.58437e+08	1.71606e+08
G3V7Q6	Proteasome subunit beta type OS=Rattus norvegicus OX=10116 GN=Psmb5 PE=1 SV=1	4.75643e+08	5.66999e+08	5.67755e+08	4.80737e+08	5.03848e+08	5.51276e+08	4.56753e+08	5.01668e+08	4.45839e+08	5.98749e+08	6.25881e+08	6.24915e+08	4.63802e+08	5.65155e+08	5.42188e+08
P14668	Annexin A5 OS=Rattus norvegicus OX=10116 GN=Anxa5 PE=1 SV=3	7.76629e+08	7.63607e+08	8.38488e+08	1.00439e+09	9.92271e+08	1.00664e+09	7.28045e+08	1.18108e+09	8.04303e+08	8.06519e+08	5.613e+08	7.42185e+08	7.30115e+08	7.85577e+08	7.63962e+08
P52481	Adenylyl cyclase-associated protein 2 OS=Rattus norvegicus OX=10116 GN=Cap2 PE=1 SV=1	3.69612e+08	4.49664e+08	4.01054e+08	3.97173e+08	3.7021e+08	3.76054e+08	3.18425e+08	3.51822e+08	5.7738e+08	3.75321e+08	4.0091e+08	4.10142e+08	4.35514e+08	4.27775e+08	4.41251e+08
F1LPB9	Rabphilin-3A OS=Rattus norvegicus OX=10116 GN=Rph3a PE=1 SV=1	2.29647e+08	2.18693e+08	2.08285e+08	2.24082e+08	2.67662e+08	2.24235e+08	2.26058e+08	224797403	3.62785e+08	1.87549e+08	2.61418e+08	1.8609e+08	2.3692e+08	2.00735e+08	2.03489e+08
P04762	Catalase OS=Rattus norvegicus OX=10116 GN=Cat PE=1 SV=3	2.72829e+08	2.45071e+08	2.75188e+08	2.64158e+08	2.75786e+08	2.82278e+08	2.33942e+08	282863143	2.25614e+08	1.92027e+08	1.94545e+08	2.05532e+08	2.77062e+08	2.92312e+08	2.79311e+08
Q1WIM2	Cell adhesion molecule 2 OS=Rattus norvegicus OX=10116 GN=Cadm2 PE=1 SV=2	4.97545e+08	5.45176e+08	5.46916e+08	4.93426e+08	5.10369e+08	4.90085e+08	5.00541e+08	478997434	6.44539e+08	4.34962e+08	5.07313e+08	4.72104e+08	5.33702e+08	4.85564e+08	5.53913e+08
O88377	Phosphatidylinositol 5-phosphate 4-kinase type-2 beta OS=Rattus norvegicus OX=10116 GN=Pip4k2b PE=1 SV=1	1.92327e+08	2.11599e+08	2.01262e+08	1.82775e+08	1.94432e+08	1.69746e+08	2.01845e+08	1.80828e+08	2.14938e+08	1.82747e+08	1.94814e+08	1.77547e+08	1.88715e+08	1.78969e+08	1.97023e+08
Q6AY09	Heterogeneous nuclear ribonucleoprotein H2 OS=Rattus norvegicus OX=10116 GN=Hnrnph2 PE=1 SV=1	1.17669e+08	1.15411e+08	1.22453e+08	1.03761e+08	1.13768e+08	1.12352e+08	1.17163e+08	106135163	1.17865e+08	1.28814e+08	1.16384e+08	1.08788e+08	1.13099e+08	1.14483e+08	1.08293e+08
P37805	Transgelin-3 OS=Rattus norvegicus OX=10116 GN=Tagln3 PE=1 SV=2	1.07239e+09	1.05189e+09	9.9054e+08	9.51346e+08	1.09891e+09	1.73924e+09	1.03109e+09	9.7621e+08	9.65497e+08	1.15996e+09	1.10319e+09	1.08815e+09	1.00031e+09	1.01287e+09	9.93583e+08
Q8VI04	Isoaspartyl peptidase/L-asparaginase OS=Rattus norvegicus OX=10116 GN=Asrgl1 PE=1 SV=1	1.22404e+09	1.2565e+09	1.23393e+09	1.19669e+09	1.17097e+09	1.27476e+09	1.17457e+09	1.19583e+09	1.21279e+09	1.26454e+09	1.2221e+09	1.25746e+09	1.28013e+09	1.21524e+09	1.28993e+09
Q5U2N2	Ubiquitin specific protease 14 OS=Rattus norvegicus OX=10116 GN=Usp14 PE=1 SV=1	4.30345e+08	4.02588e+08	4.73497e+08	4.42669e+08	4.25236e+08	4.00053e+08	3.83602e+08	3.63285e+08	3.59634e+08	4.9374e+08	4.43128e+08	4.09303e+08	4.16139e+08	4.14789e+08	3.93246e+08
F1M1Y0	SH3-containing GRB2-like protein 3-interacting protein 1 OS=Rattus norvegicus OX=10116 GN=Sgip1 PE=1 SV=3	6.17501e+06	7.16705e+06	4.19035e+06	1.28435e+07	2.36807e+07	1.27411e+07	1.14256e+07	1.27123e+07	2.26689e+08	7.16636e+06	1.98883e+06	4.20386e+06	4.11472e+06	2.66459e+06	3.1754e+06
D3ZBL5	Type I inositol 3,4-bisphosphate 4-phosphatase OS=Rattus norvegicus OX=10116 GN=Inpp4a PE=1 SV=3	2.50303e+08	2.21295e+08	2.43441e+08	1.62002e+08	2.35346e+08	2.03938e+08	2.21705e+08	2.11877e+08	2.31579e+08	2.52809e+08	2.08395e+08	1.9563e+08	2.26825e+08	2.12199e+08	2.41496e+08
P61751	ADP-ribosylation factor 4 OS=Rattus norvegicus OX=10116 GN=Arf4 PE=2 SV=2	1.04399e+08	1.09284e+08	1.21012e+08	1.13837e+08	1.0447e+08	1.09474e+08	9.43186e+07	105118390	9.23307e+07	1.11213e+08	1.0538e+08	1.06335e+08	9.56368e+07	1.12627e+08	1.14568e+08
F1M7P4	Peripherin OS=Rattus norvegicus OX=10116 GN=Prph PE=1 SV=1	2.56315e+08	2.73533e+08	2.34363e+08	3.71167e+08	2.56212e+08	3.96044e+08	3.65943e+08	2.79589e+08	2.43796e+08	1.80769e+08	8.61415e+07	3.23345e+08	1.63497e+08	3.48335e+08	2.45042e+08
M0RBF1	Complement C3 OS=Rattus norvegicus OX=10116 GN=C3 PE=1 SV=1	3.09963e+08	1.98629e+08	1.96008e+08	2.45709e+08	2.66396e+08	2.38146e+08	2.12971e+08	268243656	1.70702e+08	1.79837e+08	3.24986e+08	2.11911e+08	2.33357e+08	3.05204e+08	2.40274e+08
Q5PQK5	Radixin OS=Rattus norvegicus OX=10116 GN=Rdx PE=2 SV=1	9.70295e+07	1.04702e+08	9.55313e+07	1.09588e+08	1.03128e+08	1.0397e+08	1.01159e+08	9.76362e+07	8.89113e+07	9.62635e+07	1.0655e+08	1.12366e+08	9.07924e+07	9.15363e+07	9.48238e+07
O35314	Secretogranin-1 OS=Rattus norvegicus OX=10116 GN=Chgb PE=1 SV=2	3.98843e+08	3.59497e+08	4.26303e+08	3.55595e+08	3.02372e+08	3.18825e+08	3.53405e+08	3.43319e+08	3.42745e+08	4.53709e+08	3.42881e+08	3.16549e+08	3.51498e+08	3.37778e+08	3.66065e+08
P47875	Cysteine and glycine-rich protein 1 OS=Rattus norvegicus OX=10116 GN=Csrp1 PE=1 SV=2	7.14637e+08	7.61783e+08	7.28064e+08	7.20517e+08	8.43253e+08	8.80605e+08	7.0679e+08	1109328167	7.96971e+08	4.84963e+08	5.27596e+08	5.90431e+08	6.4018e+08	6.68439e+08	6.55597e+08
F7EUU4	COP9 signalosome subunit 5 OS=Rattus norvegicus OX=10116 GN=Cops5 PE=1 SV=1	4.1774e+08	4.14632e+08	4.21191e+08	4.3979e+08	4.39961e+08	4.0945e+08	3.67591e+08	3.91873e+08	4.0758e+08	4.68951e+08	4.13691e+08	3.82856e+08	3.8496e+08	4.24548e+08	3.68077e+08
F1LQI1	Hydroxyacyl glutathione hydrolase OS=Rattus norvegicus OX=10116 GN=Hagh PE=1 SV=2	5.45897e+08	5.86132e+08	6.24823e+08	5.60018e+08	5.28755e+08	4.89765e+08	5.78112e+08	555912192	5.58371e+08	5.62056e+08	5.44839e+08	5.47099e+08	5.7133e+08	5.45113e+08	6.13728e+08
A0A0G2K9I6	Ceruloplasmin OS=Rattus norvegicus OX=10116 GN=Cp PE=1 SV=1	1.52536e+08	1.31784e+08	1.17742e+08	1.78623e+08	1.6899e+08	1.97989e+08	1.06569e+08	235388966	1.14769e+08	1.32738e+08	1.30902e+08	1.47328e+08	1.13542e+08	1.66153e+08	1.28812e+08
P62749	Hippocalcin-like protein 1 OS=Rattus norvegicus OX=10116 GN=Hpcal1 PE=1 SV=2	8.19246e+08	8.77201e+08	9.04215e+08	8.49271e+08	8.22627e+08	7.26881e+08	8.48506e+08	850131996	7.10517e+08	9.28799e+08	8.49064e+08	8.31632e+08	8.40541e+08	8.09654e+08	8.75601e+08
P81155	Voltage-dependent anion-selective channel protein 2 OS=Rattus norvegicus OX=10116 GN=Vdac2 PE=1 SV=2	3.6922e+09	3.9853e+09	3.91473e+09	3.57563e+09	3.6838e+09	3.57407e+09	3.65933e+09	3571403125	3.83972e+09	3.61448e+09	3.70971e+09	3.77309e+09	3.91925e+09	3.62476e+09	3.91168e+09
A0A0G2K9A2	Arp2/3 complex 34 kDa subunit OS=Rattus norvegicus OX=10116 GN=Arpc2 PE=1 SV=1	1.7404e+09	1.75247e+09	1.86674e+09	1.7564e+09	1.6838e+09	1.56792e+09	1.62563e+09	1702124350	1.86866e+09	1.68328e+09	1.47127e+09	1.51969e+09	1.6951e+09	1.67548e+09	1.77713e+09
Q5PPJ9	Endophilin-B2 OS=Rattus norvegicus OX=10116 GN=Sh3glb2 PE=1 SV=2	4.23126e+07	4.79383e+07	4.56215e+07	4.445e+07	3.41588e+07	6.43422e+06	4.90807e+07	44692144	4.65134e+07	4.43134e+07	7.06845e+06	5.02193e+07	4.74653e+07	4.26063e+07	4.11663e+07
Q5XIC6	Proteasome (Prosome, macropain) 26S subunit, non-ATPase, 12 OS=Rattus norvegicus OX=10116 GN=Psmd12 PE=1 SV=1	2.71185e+08	2.84579e+08	3.04248e+08	2.91707e+08	2.7739e+08	2.57156e+08	2.71468e+08	2.64415e+08	2.51274e+08	3.00831e+08	3.02249e+08	2.94397e+08	2.93637e+08	2.23853e+08	3.01471e+08
P08050	Gap junction alpha-1 protein OS=Rattus norvegicus OX=10116 GN=Gja1 PE=1 SV=2	8.04417e+08	8.95935e+08	8.9831e+08	8.8107e+08	8.84119e+08	9.47807e+08	8.31516e+08	8.51895e+08	7.1841e+08	9.08752e+08	9.83647e+08	1.02243e+09	9.04654e+08	8.55514e+08	1.02123e+09
A0A0G2JWA3	Exportin 7 OS=Rattus norvegicus OX=10116 GN=Xpo7 PE=1 SV=1	2.22186e+08	2.30618e+08	2.17696e+08	2.06974e+08	2.15358e+08	1.986e+08	2.30038e+08	2.08446e+08	1.96632e+08	2.49446e+08	1.97867e+08	2.13718e+08	2.39028e+08	2.26212e+08	2.44208e+08
P62909	40S ribosomal protein S3 OS=Rattus norvegicus OX=10116 GN=Rps3 PE=1 SV=1	1.09582e+09	1.10594e+09	1.12379e+09	1.12907e+09	1.11975e+09	1.09633e+09	1.02343e+09	1068873215	1.02468e+09	1.24146e+09	1.16325e+09	1.17124e+09	1.01505e+09	1.034e+09	1.14815e+09
A0A0G2K5N6	Rho-associated protein kinase OS=Rattus norvegicus OX=10116 GN=Rock2 PE=1 SV=1	1.99595e+08	1.78524e+08	1.76242e+08	1.65103e+08	1.70452e+08	1.60047e+08	1.81947e+08	188006130	1.93477e+08	1.59361e+08	1.51813e+08	1.36039e+08	1.75636e+08	1.55603e+08	1.8897e+08
G3V914	Glutamate receptor 2 OS=Rattus norvegicus OX=10116 GN=Gria2 PE=3 SV=2	1.14497e+08	1.22547e+08	1.35974e+08	1.3427e+08	1.11359e+08	1.16308e+08	1.31601e+08	1.14288e+08	1.85209e+08	1.56429e+08	1.42973e+08	1.56368e+08	1.45055e+08	1.22826e+08	1.49349e+08
A0A0G2K7X2	Tnf receptor-associated factor 3 OS=Rattus norvegicus OX=10116 GN=Traf3 PE=4 SV=1	2.62693e+08	2.5973e+08	2.5497e+08	2.8365e+08	2.05869e+08	2.52134e+08	2.44352e+08	2.05804e+08	1.58494e+08	2.86675e+08	2.85094e+08	2.54386e+08	2.81408e+08	2.29716e+08	2.65171e+08
Q6P503	ATPase H+-transporting V1 subunit D OS=Rattus norvegicus OX=10116 GN=Atp6v1d PE=1 SV=1	1.04134e+09	1.06912e+09	1.03864e+09	9.63342e+08	9.66504e+08	8.85578e+08	1.00002e+09	9.3384e+08	1.08029e+09	1.0915e+09	1.05249e+09	1.02147e+09	1.03162e+09	9.7557e+08	1.06932e+09
Q01066	Calcium/calmodulin-dependent 3',5'-cyclic nucleotide phosphodiesterase 1B OS=Rattus norvegicus OX=10116 GN=Pde1b PE=1 SV=1	9.00532e+07	9.92706e+07	1.17791e+08	9.05098e+07	1.12277e+08	9.43848e+07	8.80712e+07	9.21095e+07	3.21991e+08	1.25096e+08	1.20443e+08	1.08707e+08	1.07316e+08	9.8387e+07	1.10527e+08
D3ZV52	Intersectin-1 OS=Rattus norvegicus OX=10116 GN=Itsn1 PE=1 SV=3	1.7933e+08	1.63494e+08	1.88531e+08	1.57826e+08	1.66572e+08	1.64028e+08	1.73064e+08	1.73682e+08	2.07482e+08	1.64892e+08	1.41535e+08	1.32427e+08	1.42792e+08	1.65937e+08	1.77914e+08
S4VP54	MAP2K4delta OS=Rattus norvegicus OX=10116 GN=Map2k4 PE=2 SV=1	3.3301e+08	3.24594e+08	3.20316e+08	3.2405e+08	3.28202e+08	3.2014e+08	3.28228e+08	3.18917e+08	3.06782e+08	3.11918e+08	3.23744e+08	3.07853e+08	3.36034e+08	3.00408e+08	3.03276e+08
P62483	Voltage-gated potassium channel subunit beta-2 OS=Rattus norvegicus OX=10116 GN=Kcnab2 PE=1 SV=1	2.5661e+08	2.60681e+08	2.67997e+08	2.33234e+08	2.97246e+08	3.01518e+08	2.68011e+08	2.27763e+08	3.01677e+08	2.54395e+08	3.04027e+08	2.74618e+08	2.49656e+08	2.30581e+08	2.39695e+08
A0A0G2K3V4	O-linked N-acetylglucosamine (GlcNAc) transferase (UDP-N-acetylglucosamine:polypeptide-N-acetylglucosaminyl transferase), isoform CRA_a OS=Rattus norvegicus OX=10116 GN=Ogt PE=1 SV=1	2.04822e+08	2.1739e+08	2.05269e+08	2.10147e+08	1.96993e+08	1.92985e+08	2.08041e+08	1.99451e+08	2.21194e+08	2.03281e+08	1.79538e+08	1.70078e+08	1.94341e+08	2.0376e+08	2.23966e+08
B1H262	Protein phosphatase 1, regulatory subunit 9B OS=Rattus norvegicus OX=10116 GN=Ppp1r9b PE=2 SV=1	1.16149e+08	1.11059e+08	1.10566e+08	1.11199e+08	9.37936e+07	9.29961e+07	1.00072e+08	1.03271e+08	1.49387e+08	1.03887e+08	1.12581e+08	9.28474e+07	9.27078e+07	9.65978e+07	7.95241e+07
A0A0G2K677	Spectrin beta chain OS=Rattus norvegicus OX=10116 GN=Sptbn4 PE=1 SV=1	5.99494e+07	5.38644e+07	5.56668e+07	5.6551e+07	6.10245e+07	4.69441e+07	4.99269e+07	5.63806e+07	6.24455e+07	4.67467e+07	5.68487e+07	5.05089e+07	5.15248e+07	4.98071e+07	4.82239e+07
Q9Z270	Vesicle-associated membrane protein-associated protein A OS=Rattus norvegicus OX=10116 GN=Vapa PE=1 SV=3	4.90047e+08	4.42462e+08	4.06662e+08	5.20658e+08	5.45517e+08	5.47289e+08	4.39961e+08	4.2833e+08	5.13364e+08	5.77996e+08	5.57423e+08	5.49435e+08	4.99517e+08	4.5501e+08	4.28893e+08
Q5M7U6	Actin-related protein 2 OS=Rattus norvegicus OX=10116 GN=Actr2 PE=2 SV=1	7.55885e+08	7.64359e+08	7.74053e+08	8.22949e+08	7.99849e+08	8.07345e+08	7.75589e+08	7.49468e+08	8.91937e+08	8.00864e+08	7.47761e+08	8.92031e+08	7.44911e+08	8.20137e+08	7.46198e+08
P10960	Prosaposin OS=Rattus norvegicus OX=10116 GN=Psap PE=1 SV=1	2.40963e+09	2.13632e+09	2.44715e+09	2.08172e+09	2.47883e+09	2.23914e+09	2.13575e+09	2318262966	1.75452e+09	2.5187e+09	2.19683e+09	2.10236e+09	2.12675e+09	2.38377e+09	2.49318e+09
Q7TT49	Serine/threonine-protein kinase MRCK beta OS=Rattus norvegicus OX=10116 GN=Cdc42bpb PE=1 SV=1	1.02924e+08	1.032e+08	1.02419e+08	9.25067e+07	9.71763e+07	8.54319e+07	1.0495e+08	9.81849e+07	9.95455e+07	1.1945e+08	9.02454e+07	9.53225e+07	9.48521e+07	9.81736e+07	1.00089e+08
G3V8C4	Chloride intracellular channel protein OS=Rattus norvegicus OX=10116 GN=Clic4 PE=1 SV=1	3.12533e+08	3.0127e+08	3.22274e+08	3.44638e+08	3.46504e+08	3.21218e+08	2.41546e+08	349750958	2.65909e+08	2.95661e+08	3.11043e+08	3.31998e+08	2.98169e+08	3.05564e+08	3.2562e+08
F1LYQ8	FERM, ARHGEF and pleckstrin domain-containing protein 1 OS=Rattus norvegicus OX=10116 GN=Farp1 PE=1 SV=2	1.30093e+08	1.40564e+08	1.21048e+08	1.05285e+08	1.02004e+08	8.49761e+07	1.15797e+08	103219745	1.04904e+08	1.25798e+08	9.82642e+07	1.48376e+08	9.96326e+07	1.23667e+08	1.49033e+08
G3V6I1	Lethal(2) giant larvae protein homolog 1 OS=Rattus norvegicus OX=10116 GN=Llgl1 PE=1 SV=2	2.39766e+08	2.32578e+08	2.46027e+08	2.37239e+08	2.15194e+08	2.35967e+08	1.92505e+08	2.48825e+08	1.64874e+08	1.77368e+08	1.94809e+08	1.69593e+08	2.32601e+08	1.86856e+08	1.80217e+08
P27605	Hypoxanthine-guanine phosphoribosyltransferase OS=Rattus norvegicus OX=10116 GN=Hprt1 PE=1 SV=1	1.4666e+09	1.55359e+09	1.52195e+09	1.42029e+09	1.41059e+09	1.47817e+09	1.46312e+09	1442024910	1.24541e+09	1.6638e+09	1.48576e+09	1.40491e+09	1.52231e+09	1.39216e+09	1.51577e+09
A0A0G2K9P4	Endophilin-B2 OS=Rattus norvegicus OX=10116 GN=Sh3glb2 PE=1 SV=1	1.53239e+07	1.30549e+07	1.34923e+07	1.6587e+07	1.19061e+07	1.52047e+07	1.50036e+07	16951834	1.19363e+07	8.54621e+06	1.04743e+07	7.31749e+06	1.17789e+07	1.33345e+07	1.32512e+07
P15650	Long-chain specific acyl-CoA dehydrogenase, mitochondrial OS=Rattus norvegicus OX=10116 GN=Acadl PE=1 SV=1	3.87205e+08	4.09206e+08	4.48483e+08	4.08854e+08	4.10889e+08	3.99356e+08	3.6475e+08	415367568	3.59348e+08	3.03668e+08	3.34695e+08	3.67335e+08	3.97178e+08	3.91478e+08	4.1874e+08
A0A0H2UHG4	Cyclin-dependent kinase 18 OS=Rattus norvegicus OX=10116 GN=Cdk18 PE=1 SV=1	3.12877e+08	3.3068e+08	3.37549e+08	2.68312e+08	2.95164e+08	2.90238e+08	3.25116e+08	2.88742e+08	2.40883e+08	3.19643e+08	2.89438e+08	2.46153e+08	3.21331e+08	3.00598e+08	3.02301e+08
Q6P9V6	Proteasome subunit alpha type OS=Rattus norvegicus OX=10116 GN=Psma5 PE=1 SV=1	5.28997e+08	5.49576e+08	5.46934e+08	5.14305e+08	5.27758e+08	4.92728e+08	5.13425e+08	5.04214e+08	4.55617e+08	5.7751e+08	5.23542e+08	5.21816e+08	5.58636e+08	5.16414e+08	5.57445e+08
P31647	Sodium- and chloride-dependent GABA transporter 3 OS=Rattus norvegicus OX=10116 GN=Slc6a11 PE=1 SV=1	5.35264e+09	5.90624e+09	6.42788e+09	5.77087e+09	5.68004e+09	4.92277e+09	4.85669e+09	5.29055e+09	3.5822e+09	5.54528e+09	5.25722e+09	4.70531e+09	6.36419e+09	5.79379e+09	6.17088e+09
D4A830	Pyrophosphatase (inorganic) 2 OS=Rattus norvegicus OX=10116 GN=Ppa2 PE=1 SV=2	2.01814e+08	2.55972e+08	2.37346e+08	2.21122e+08	2.44185e+08	2.72713e+08	2.60345e+08	212294404	2.33314e+08	2.31409e+08	2.32049e+08	1.92441e+08	2.60837e+08	2.22892e+08	2.40579e+08
A0A0G2K4X8	S-phase kinase-associated protein 1 OS=Rattus norvegicus OX=10116 GN=Skp1 PE=1 SV=1	5.94014e+08	6.27756e+08	6.3546e+08	5.99602e+08	5.86351e+08	5.89202e+08	6.16325e+08	6.2499e+08	6.02614e+08	6.20615e+08	5.63574e+08	6.27931e+08	5.79212e+08	5.90146e+08	5.87915e+08
A0A0G2JTG7	Heterogeneous nuclear ribonucleoprotein H OS=Rattus norvegicus OX=10116 GN=Hnrnph1 PE=1 SV=1	8.03232e+07	9.0039e+07	8.03223e+07	7.37626e+07	7.98134e+07	7.91951e+07	7.65136e+07	7.74167e+07	8.69607e+07	7.81081e+07	7.69135e+07	8.63638e+07	6.93054e+07	7.21492e+07	7.1393e+07
P61203	COP9 signalosome complex subunit 2 OS=Rattus norvegicus OX=10116 GN=Cops2 PE=1 SV=1	1.53622e+08	1.69631e+08	1.65253e+08	1.4262e+08	1.70687e+08	1.88504e+08	1.51386e+08	1.59913e+08	1.49968e+08	1.93382e+08	1.64822e+08	1.69658e+08	1.52691e+08	1.53301e+08	1.60384e+08
Q4QQV4	Dead end homolog 1 (Zebrafish) OS=Rattus norvegicus OX=10116 GN=Hars PE=1 SV=1	3.14555e+08	2.76258e+08	3.24788e+08	2.92553e+08	2.91949e+08	2.78574e+08	3.53006e+08	278049988	2.52549e+08	3.18392e+08	3.03342e+08	2.90255e+08	3.07308e+08	3.06173e+08	3.15593e+08
A0A0G2K0J2	Voltage-dependent calcium channel subunit alpha-2/delta-2 OS=Rattus norvegicus OX=10116 GN=Cacna2d2 PE=1 SV=1	2.43307e+08	2.43252e+08	2.75344e+08	2.63101e+08	2.74262e+08	2.48522e+08	2.92224e+08	2.57073e+08	2.494e+08	2.86602e+08	2.50515e+08	2.37444e+08	3.0673e+08	2.2025e+08	2.3364e+08
P00787	Cathepsin B OS=Rattus norvegicus OX=10116 GN=Ctsb PE=1 SV=2	3.2627e+08	2.91165e+08	2.73376e+08	3.11689e+08	2.97866e+08	3.89832e+08	2.90875e+08	2.42671e+08	2.55571e+08	3.4124e+08	3.27523e+08	3.26976e+08	2.5395e+08	2.7855e+08	2.64748e+08
F1LVS1	BAI1-associated protein 3 OS=Rattus norvegicus OX=10116 GN=Baiap3 PE=1 SV=2	2.07668e+08	2.4139e+08	2.27818e+08	1.89668e+08	2.40007e+08	2.11046e+08	2.50171e+08	2.12236e+08	1.6083e+08	3.28339e+08	2.47923e+08	2.26664e+08	1.95803e+08	2.23306e+08	2.53321e+08
D4AEH3	Proteasome (Prosome, macropain) 26S subunit, non-ATPase, 7 (Predicted) OS=Rattus norvegicus OX=10116 GN=Psmd7 PE=1 SV=1	2.48294e+08	2.42479e+08	2.52025e+08	2.18058e+08	2.374e+08	2.24764e+08	2.33607e+08	2.42464e+08	2.26905e+08	2.60587e+08	2.35575e+08	2.13672e+08	2.5547e+08	2.36333e+08	2.2775e+08
Q32Q06	AP-1 complex subunit mu-1 OS=Rattus norvegicus OX=10116 GN=Ap1m1 PE=1 SV=3	3.70983e+08	3.70231e+08	4.29902e+08	3.86136e+08	4.13582e+08	2.87958e+08	3.24046e+08	3.90037e+08	3.57331e+08	4.39408e+08	3.69691e+08	3.68661e+08	3.92836e+08	3.84074e+08	4.55597e+08
Q63555	SP120 OS=Rattus norvegicus OX=10116 PE=2 SV=1	8.56765e+08	8.44158e+08	8.08968e+08	8.42991e+08	8.29628e+08	8.35865e+08	8.10127e+08	7.73811e+08	8.55649e+08	8.61163e+08	8.41218e+08	7.96423e+08	7.86295e+08	7.7046e+08	8.15534e+08
B0BNK1	RAB5C, member RAS oncogene family OS=Rattus norvegicus OX=10116 GN=Rab5c PE=1 SV=1	2.91614e+08	3.23873e+08	2.64663e+08	2.86541e+08	2.9564e+08	2.9971e+08	3.09664e+08	291952801	3.11579e+08	3.38375e+08	3.14526e+08	3.26672e+08	3.03369e+08	3.03537e+08	2.96991e+08
E9PTN6	Glyceraldehyde-3-phosphate dehydrogenase OS=Rattus norvegicus OX=10116 PE=3 SV=1	654925	6.2679e+06	4.79829e+06		1.05029e+06	564403	9.59631e+06	5.88589e+06	1.3563e+06	7.48321e+06	1.56141e+06	8.25979e+06	771156	3.90059e+06	4.01205e+06
Q6AXR6	Glutathione S-transferase omega 1, isoform CRA_b OS=Rattus norvegicus OX=10116 GN=Gsto1 PE=1 SV=1	7.69407e+08	7.22867e+08	7.91398e+08	7.46765e+08	7.48603e+08	7.59566e+08	7.42933e+08	7.4605e+08	8.8676e+08	6.84376e+08	6.63775e+08	6.5143e+08	7.50218e+08	7.10774e+08	7.56814e+08
A0A0G2K0W9	Proteasome subunit alpha type OS=Rattus norvegicus OX=10116 GN=Psma7 PE=1 SV=1	4.70165e+08	5.02389e+08	5.34868e+08	4.93733e+08	4.93117e+08	4.84144e+08	4.76394e+08	4.97116e+08	4.74801e+08	5.3969e+08	5.11829e+08	4.8701e+08	5.28279e+08	5.23358e+08	5.13393e+08
B5DEN5	Eukaryotic translation elongation factor 1 beta 2 OS=Rattus norvegicus OX=10116 GN=Eef1b2 PE=1 SV=1	5.54383e+08	5.69802e+08	5.82291e+08	5.19893e+08	5.38342e+08	5.00448e+08	5.63461e+08	5.40494e+08	4.88562e+08	5.94545e+08	5.58696e+08	5.30426e+08	5.45245e+08	4.90297e+08	5.52555e+08
Q68FU3	Electron transfer flavoprotein subunit beta OS=Rattus norvegicus OX=10116 GN=Etfb PE=1 SV=3	5.43973e+08	5.45342e+08	5.60936e+08	5.03586e+08	5.53211e+08	5.08413e+08	5.78566e+08	5.29468e+08	5.50507e+08	5.09657e+08	5.57105e+08	5.42657e+08	5.29757e+08	5.256e+08	5.73436e+08
Q1WIM1	Cell adhesion molecule 4 OS=Rattus norvegicus OX=10116 GN=Cadm4 PE=1 SV=1	5.37208e+08	6.6262e+08	5.70139e+08	5.79254e+08	5.8697e+08	4.80667e+08	6.24653e+08	5.85978e+08	5.16043e+08	6.37652e+08	5.38679e+08	6.22337e+08	6.33604e+08	6.01578e+08	6.47595e+08
F1LS86	Isoleucine-tRNA synthetase (Predicted) OS=Rattus norvegicus OX=10116 GN=Iars PE=1 SV=2	1.73485e+08	1.7531e+08	1.71625e+08	1.79755e+08	1.6744e+08	1.68153e+08	1.6702e+08	1.59097e+08	1.52608e+08	1.85974e+08	1.78749e+08	1.73011e+08	1.68025e+08	1.51107e+08	1.7322e+08
D3ZE17	Caskin-1 OS=Rattus norvegicus OX=10116 GN=Caskin1 PE=1 SV=2	1.26435e+07	2.34808e+07	3.59529e+07	2.28088e+07	1.95877e+07	1.9695e+07	1.80792e+07	2.65463e+07	3.23683e+08	1.41848e+07	1.27314e+07	2.97155e+07	2.26279e+07	1.10601e+07	2.96712e+07
Q6P9V7	Proteasome (Prosome, macropain) activator subunit 1 OS=Rattus norvegicus OX=10116 GN=Psme1 PE=1 SV=1	4.1726e+08	4.6389e+08	4.79062e+08	4.33902e+08	4.35514e+08	4.23325e+08	4.51944e+08	4.76725e+08	3.30217e+08	5.49543e+08	3.95905e+08	4.68948e+08	4.42247e+08	4.91506e+08	4.62319e+08
Q9JHL4	Drebrin-like protein OS=Rattus norvegicus OX=10116 GN=Dbnl PE=1 SV=1	2.89867e+08	2.78475e+08	3.01613e+08	2.66578e+08	2.20167e+08	2.761e+08	2.75454e+08	223694270	3.17885e+08	3.10923e+08	3.12547e+08	2.77623e+08	2.73108e+08	2.64981e+08	2.76242e+08
Q63525	Nuclear migration protein nudC OS=Rattus norvegicus OX=10116 GN=Nudc PE=1 SV=1	5.97356e+08	6.3632e+08	6.66647e+08	5.69546e+08	6.24264e+08	5.5784e+08	6.16018e+08	594309278	5.63575e+08	5.88766e+08	5.37255e+08	5.25732e+08	6.05612e+08	6.41377e+08	6.54562e+08
Q9WV63	Kinesin-like protein KIF2A OS=Rattus norvegicus OX=10116 GN=Kif2a PE=1 SV=2	4.19155e+08	4.01891e+08	4.50116e+08	4.13573e+08	4.24736e+08	4.3424e+08	4.16758e+08	4.38388e+08	4.29701e+08	4.77234e+08	4.72431e+08	3.3901e+08	4.20203e+08	3.72112e+08	3.86185e+08
B5DF41	Syntaphilin OS=Rattus norvegicus OX=10116 GN=Snph PE=1 SV=1	1.89251e+08	1.92845e+08	1.96768e+08	1.80384e+08	1.76844e+08	1.68205e+08	1.82668e+08	1.91913e+08	1.96728e+08	1.55915e+08	1.58588e+08	1.76443e+08	1.8392e+08	1.87675e+08	2.00223e+08
O89049	Thioredoxin reductase 1, cytoplasmic OS=Rattus norvegicus OX=10116 GN=Txnrd1 PE=1 SV=5	1.51378e+08	1.53338e+08	1.57134e+08	1.37731e+08	1.4652e+08	1.44207e+08	1.54642e+08	1.56505e+08	1.28686e+08	1.67801e+08	1.48782e+08	1.45519e+08	1.48789e+08	1.46165e+08	1.49242e+08
D4A5L9	Uncharacterized protein OS=Rattus norvegicus OX=10116 PE=3 SV=1	4.53779e+09	4.71967e+09	4.45886e+09	4.14811e+09	4.17191e+09	4.50548e+09	4.16253e+09	4.2285e+09	4.68406e+09	3.92819e+09	4.43041e+09	4.04931e+09	4.61974e+09	4.15814e+09	4.52253e+09
P18420	Proteasome subunit alpha type-1 OS=Rattus norvegicus OX=10116 GN=Psma1 PE=1 SV=2	6.82716e+08	5.5148e+08	6.02259e+08	7.13421e+08	5.30986e+08	5.78718e+08	5.4453e+08	6.82988e+08	5.04237e+08	5.96394e+08	5.57807e+08	5.58772e+08	5.72753e+08	5.33172e+08	5.54188e+08
Q63362	NADH dehydrogenase [ubiquinone] 1 alpha subcomplex subunit 5 OS=Rattus norvegicus OX=10116 GN=Ndufa5 PE=1 SV=3	5.21837e+08	6.09897e+08	4.95706e+08	5.28392e+08	5.11384e+08	4.81875e+08	4.99179e+08	5.55997e+08	5.59628e+08	5.40398e+08	5.54047e+08	5.25636e+08	5.67706e+08	5.25145e+08	5.39629e+08
G3V6H0	RCG48149, isoform CRA_b OS=Rattus norvegicus OX=10116 GN=LOC100363782 PE=1 SV=1	3.77391e+08	6.64096e+08	3.96023e+08	3.70233e+08	6.46668e+08	3.50813e+08	3.79034e+08	3.76364e+08	3.75374e+08	4.09628e+08	3.50442e+08	3.56211e+08	3.61501e+08	3.77052e+08	3.79754e+08
P54319	Phospholipase A-2-activating protein OS=Rattus norvegicus OX=10116 GN=Plaa PE=1 SV=3	1.26655e+08	1.33375e+08	1.53295e+08	1.43998e+08	1.26332e+08	1.48627e+08	1.24252e+08	140802631	1.34683e+08	1.38045e+08	1.41394e+08	1.4299e+08	1.34508e+08	1.42068e+08	1.40592e+08
F1LT49	Leucine-rich repeat-containing 47 OS=Rattus norvegicus OX=10116 GN=Lrrc47 PE=1 SV=2	1.80185e+08	1.97647e+08	2.04112e+08	1.82549e+08	1.56861e+08	1.43953e+08	1.88477e+08	1.63103e+08	2.20371e+08	2.02906e+08	1.92e+08	1.85522e+08	1.89704e+08	1.7052e+08	1.47547e+08
A0A0H2UHE5	Protein phosphatase 1A OS=Rattus norvegicus OX=10116 GN=Ppm1a PE=1 SV=1	3.60103e+08	3.75814e+08	3.5237e+08	3.30513e+08	3.51778e+08	3.06547e+08	3.06547e+08	311144775	3.21794e+08	3.39431e+08	3.09943e+08	3.04371e+08	3.94603e+08	3.57021e+08	3.88699e+08
A0A0G2K737	Thioredoxin-like protein 1 OS=Rattus norvegicus OX=10116 GN=Txnl1 PE=1 SV=1	7.61949e+08	8.44891e+08	8.18739e+08	7.80425e+08	7.66699e+08	6.25403e+08	8.34262e+08	7.95299e+08	7.87738e+08	8.58241e+08	8.01231e+08	8.11885e+08	8.14668e+08	7.761e+08	7.79187e+08
Q5RJL0	Ermin OS=Rattus norvegicus OX=10116 GN=Ermn PE=1 SV=1	1.78725e+08	1.63032e+08	1.93029e+08	2.35483e+08	1.91146e+08	1.94648e+08	2.05031e+08	1.97029e+08	2.19886e+08	1.68333e+08	2.08566e+08	2.98868e+08	2.05687e+08	1.9376e+08	1.41466e+08
A0A1W2Q6Q2	Serine/threonine-protein kinase DCLK1 OS=Rattus norvegicus OX=10116 GN=Dclk1 PE=1 SV=1	1.82212e+08	1.58066e+08	1.76422e+08	1.79308e+08	1.11711e+08	1.34237e+08	1.79825e+08	1.63309e+08	3.27507e+08	1.65725e+08	1.50626e+08	1.59147e+08	1.24448e+08	1.51115e+08	1.54489e+08
Q6AY30	Saccharopine dehydrogenase-like oxidoreductase OS=Rattus norvegicus OX=10116 GN=Sccpdh PE=1 SV=1	5.86242e+08	6.01749e+08	6.56091e+08	5.5527e+08	5.40824e+08	5.41985e+08	5.76811e+08	5.38654e+08	5.50902e+08	6.15979e+08	5.44846e+08	6.48539e+08	5.50435e+08	5.99525e+08	5.70104e+08
O55171	Acyl-coenzyme A thioesterase 2, mitochondrial OS=Rattus norvegicus OX=10116 GN=Acot2 PE=1 SV=1	3.27741e+08	3.5358e+08	3.42313e+08	3.51799e+08	3.27562e+08	2.96831e+08	3.42252e+08	3.4368e+08	2.81915e+08	3.46108e+08	2.97608e+08	3.3167e+08	3.32075e+08	3.63199e+08	3.63241e+08
Q6AYS2	Sideroflexin OS=Rattus norvegicus OX=10116 GN=Sfxn1 PE=1 SV=1	1.50402e+08	1.51655e+08	1.6606e+08	1.4113e+08	1.36362e+08	1.34394e+08	1.47559e+08	133369192	1.37023e+08	1.36535e+08	1.21645e+08	1.16458e+08	1.38523e+08	1.28955e+08	1.40574e+08
P24268	Cathepsin D OS=Rattus norvegicus OX=10116 GN=Ctsd PE=1 SV=1	1.07394e+09	1.16624e+09	1.17471e+09	1.12996e+09	1.14379e+09	1.12173e+09	1.05214e+09	1.12665e+09	9.34715e+08	1.02445e+09	1.08156e+09	1.04775e+09	1.09791e+09	1.03113e+09	1.1237e+09
G3V7L8	ATPase, H+ transporting, V1 subunit E isoform 1, isoform CRA_a OS=Rattus norvegicus OX=10116 GN=Atp6v1e1 PE=1 SV=1	2.77441e+09	2.83687e+09	2.91205e+09	2.78207e+09	2.78499e+09	2.82618e+09	2.88098e+09	2.69329e+09	3.10695e+09	3.03342e+09	3.01309e+09	2.8459e+09	2.83904e+09	2.5603e+09	2.83934e+09
Q03555	Gephyrin OS=Rattus norvegicus OX=10116 GN=Gphn PE=1 SV=3	2.95317e+08	3.12615e+08	3.11653e+08	2.94167e+08	2.88666e+08	2.88663e+08	3.24595e+08	282505589	3.78817e+08	3.17749e+08	3.3057e+08	2.92895e+08	2.99765e+08	2.79082e+08	2.90411e+08
P29266	3-hydroxyisobutyrate dehydrogenase, mitochondrial OS=Rattus norvegicus OX=10116 GN=Hibadh PE=1 SV=3	3.78983e+08	4.50237e+08	3.64009e+08	4.06309e+08	3.94843e+08	3.95113e+08	3.78823e+08	3.83329e+08	3.6476e+08	3.76682e+08	3.55232e+08	3.93693e+08	3.93593e+08	3.9055e+08	3.66022e+08
Q63083	Nucleobindin-1 OS=Rattus norvegicus OX=10116 GN=Nucb1 PE=1 SV=1	1.75631e+08	1.61475e+08	2.0164e+08	1.74663e+08	1.68858e+08	1.68325e+08	1.8796e+08	178021221	1.21497e+08	1.83093e+08	1.28321e+08	1.33413e+08	1.58874e+08	1.44107e+08	1.68234e+08
B2GV74	Kinesin light chain 2 OS=Rattus norvegicus OX=10116 GN=Klc2 PE=1 SV=1	1.25688e+08	9.70751e+07	1.34299e+08	1.27891e+08	1.17127e+08	9.44885e+07	8.91217e+07	1.05236e+08	1.01457e+08	1.25663e+08	1.4776e+08	1.48124e+08	9.89591e+07	1.1951e+08	1.23867e+08
P21571	ATP synthase-coupling factor 6, mitochondrial OS=Rattus norvegicus OX=10116 GN=Atp5j PE=1 SV=1	1.50577e+09	1.57236e+09	1.64597e+09	1.5389e+09	1.41671e+09	1.28197e+09	1.5648e+09	1.46387e+09	1.5911e+09	1.40705e+09	1.4548e+09	1.55619e+09	1.65651e+09	1.4595e+09	1.51004e+09
A0A096MJN4	Septin 4 OS=Rattus norvegicus OX=10116 GN=Sept4 PE=1 SV=1	3.18962e+08	3.41609e+08	3.79942e+08	4.23177e+08	3.50692e+08	3.74295e+08	3.26236e+08	3.53928e+08	3.20696e+08	2.93179e+08	3.4678e+08	4.29461e+08	3.47021e+08	3.61081e+08	3.586e+08
Q4G061	Eukaryotic translation initiation factor 3 subunit B OS=Rattus norvegicus OX=10116 GN=Eif3b PE=1 SV=1	2.7699e+08	2.69408e+08	3.02656e+08	2.71255e+08	2.74512e+08	2.57138e+08	2.5872e+08	2.53023e+08	2.33565e+08	2.79309e+08	2.49121e+08	2.40493e+08	2.834e+08	2.61341e+08	2.5663e+08
A0A0G2K350	NSF attachment protein gamma OS=Rattus norvegicus OX=10116 GN=Napg PE=1 SV=1	6.591e+08	6.81202e+08	7.09261e+08	6.91211e+08	6.59681e+08	6.45941e+08	6.57815e+08	6.33288e+08	6.82643e+08	8.48519e+08	7.7532e+08	7.60399e+08	6.81451e+08	6.56041e+08	6.89748e+08
G3V6M3	Synaptotagmin II OS=Rattus norvegicus OX=10116 GN=Syt2 PE=1 SV=1	8.15544e+07	1.12362e+08	9.83857e+07	1.04295e+08	1.06797e+08	8.8674e+07	1.05894e+08	1.13193e+08	1.04494e+08	4.64293e+07	1.19987e+08	1.24116e+08	1.09092e+08	8.2805e+07	9.77462e+07
B2RYI6	Snx4 protein OS=Rattus norvegicus OX=10116 GN=Snx4 PE=2 SV=1	1.65103e+08	1.63689e+08	1.59557e+08	1.588e+08	1.62563e+08	1.37668e+08	1.56127e+08	1.26278e+08	1.15122e+08	1.89732e+08	1.80759e+08	1.57628e+08	1.78003e+08	1.56227e+08	1.78515e+08
Q6DGG0	Peptidyl-prolyl cis-trans isomerase D OS=Rattus norvegicus OX=10116 GN=Ppid PE=1 SV=3	1.17031e+09	1.21186e+09	1.20403e+09	1.17156e+09	1.15253e+09	1.15463e+09	1.20927e+09	1072411424	1.04337e+09	1.37163e+09	1.20076e+09	1.19347e+09	1.16045e+09	1.13513e+09	1.16949e+09
B5DF65	Biliverdin reductase B OS=Rattus norvegicus OX=10116 GN=Blvrb PE=1 SV=1	7.36917e+08	7.16234e+08	6.91754e+08	7.36609e+08	7.33872e+08	6.72312e+08	1.12089e+09	7.25787e+08	7.18118e+08	1.27446e+09	1.1152e+09	6.19949e+08	7.10726e+08	7.40314e+08	7.50184e+08
Q9QUR2	Dynactin subunit 4 OS=Rattus norvegicus OX=10116 GN=Dctn4 PE=1 SV=1	1.40824e+08	1.50004e+08	1.68736e+08	1.35688e+08	1.21447e+08	1.05877e+08	1.23258e+08	125427667	1.30419e+08	1.265e+08	1.14933e+08	8.73275e+07	1.63641e+08	1.2875e+08	1.6691e+08
P32232	Cystathionine beta-synthase OS=Rattus norvegicus OX=10116 GN=Cbs PE=1 SV=3	3.44477e+08	3.47276e+08	3.37897e+08	2.96982e+08	3.09396e+08	3.72784e+08	3.09072e+08	3.12606e+08	2.95692e+08	1.76272e+08	1.89261e+08	1.6816e+08	3.35734e+08	2.45161e+08	2.93866e+08
O35264	Platelet-activating factor acetylhydrolase IB subunit beta OS=Rattus norvegicus OX=10116 GN=Pafah1b2 PE=1 SV=1	6.22218e+08	5.98163e+08	4.99711e+08	4.72992e+08	5.57971e+08	4.9351e+08	6.302e+08	5.24659e+08	5.71454e+08	6.0386e+08	5.64769e+08	5.38594e+08	5.41121e+08	5.06885e+08	5.07133e+08
P14604	Enoyl-CoA hydratase, mitochondrial OS=Rattus norvegicus OX=10116 GN=Echs1 PE=1 SV=1	6.16806e+08	6.44089e+08	6.02877e+08	6.46185e+08	7.08182e+08	7.26411e+08	6.23517e+08	525308209	5.96529e+08	7.47673e+08	7.42722e+08	7.13692e+08	6.60557e+08	6.1699e+08	6.05448e+08
F1M9G9	Sodium channel protein OS=Rattus norvegicus OX=10116 GN=Scn2a PE=1 SV=3	4.24808e+07	3.67391e+07	3.93397e+07	5.5613e+07	5.93166e+07	6.22208e+07	4.42322e+07	32661373	4.99064e+07	6.30234e+07	5.87473e+07	2.48959e+07	4.55306e+07	3.71449e+07	3.97518e+07
P97546	Neuroplastin OS=Rattus norvegicus OX=10116 GN=Nptn PE=1 SV=2	1.58808e+09	1.60776e+09	1.64497e+09	1.4583e+09	1.49241e+09	1.38282e+09	1.60903e+09	1491843953	1.81566e+09	1.36581e+09	1.37443e+09	1.38047e+09	1.57995e+09	1.41571e+09	1.55592e+09
G3V8G5	Golgi apparatus protein 1 OS=Rattus norvegicus OX=10116 GN=Glg1 PE=1 SV=1	1.2417e+08	1.29758e+08	1.10474e+08	9.561e+07	1.05332e+08	1.00487e+08	1.11923e+08	114984635	9.45756e+07	1.17182e+08	1.13103e+08	1.03094e+08	1.05533e+08	1.03728e+08	1.22115e+08
M0R608	Reticulon OS=Rattus norvegicus OX=10116 GN=Rtn1 PE=1 SV=2	5.45189e+07	9.27548e+07	8.77924e+07	4.92481e+07	5.75095e+07	7.33854e+07	6.77537e+07	63936240	6.24066e+07				5.95475e+07	5.94908e+07	6.27386e+07
D3ZU13	Eukaryotic translation initiation factor 4 gamma, 1 OS=Rattus norvegicus OX=10116 GN=Eif4g1 PE=1 SV=1	8.89944e+07	6.54796e+07	7.88119e+07	6.98377e+07	9.25201e+07	1.0415e+08	7.16261e+07	1.00163e+08	1.10128e+08	8.86112e+07	9.13538e+07	8.39319e+07	7.72233e+07	7.80518e+07	5.80376e+07
A0A0G2K0Q2	Kinesin heavy chain isoform 5A OS=Rattus norvegicus OX=10116 GN=Kif5a PE=1 SV=1	5.48815e+06			5.41443e+06	1.86976e+07	6.86766e+06	3.79834e+07	8.29267e+06	6.97521e+06	1.36241e+07	2.54123e+07	1.94654e+07	3.85354e+07	8.1448e+06	2.59616e+07
G3V6W6	Proteasome 26S subunit, ATPase 6 OS=Rattus norvegicus OX=10116 GN=Psmc6 PE=1 SV=1	2.39854e+08	2.36809e+08	2.38258e+08	1.91031e+08	2.2614e+08	2.09883e+08	2.40054e+08	212826710	2.26502e+08	2.56248e+08	2.34495e+08	2.68906e+08	2.55243e+08	2.16661e+08	2.33995e+08
Q8CFD0	Sideroflexin-5 OS=Rattus norvegicus OX=10116 GN=Sfxn5 PE=2 SV=1	8.06843e+08	8.33343e+08	8.53379e+08	7.73728e+08	7.13158e+08	7.25177e+08	7.51519e+08	7.42525e+08	7.68149e+08	8.34456e+08	7.76065e+08	8.53958e+08	8.11868e+08	8.34788e+08	8.25512e+08
G3V851	Solute carrier family 17 (Sodium-dependent inorganic phosphate cotransporter), member 6 OS=Rattus norvegicus OX=10116 GN=Slc17a6 PE=4 SV=1	4.04858e+08	3.4968e+08	4.05452e+08	3.74782e+08	3.72761e+08	3.3161e+08	4.15622e+08	3.40364e+08	3.28317e+08	4.53678e+08	4.0081e+08	2.98898e+08	3.9241e+08	3.72408e+08	3.93908e+08
P31662	Sodium-dependent neutral amino acid transporter SLC6A17 OS=Rattus norvegicus OX=10116 GN=Slc6a17 PE=1 SV=1	3.46955e+08	3.4576e+08	3.11826e+08	2.35817e+08	3.09452e+08	2.89471e+08	2.94179e+08	2.62649e+08	3.93306e+08	3.02485e+08	3.07649e+08	2.44454e+08	3.5124e+08	2.91981e+08	3.6048e+08
P62836	Ras-related protein Rap-1A OS=Rattus norvegicus OX=10116 GN=Rap1a PE=1 SV=1	1.96102e+08	2.23169e+08	2.20262e+08	2.51901e+08	2.13455e+08	2.38731e+08	2.07941e+08	2.18536e+08	2.1982e+08	1.9127e+08	2.20128e+08	2.53336e+08	2.02371e+08	2.07662e+08	2.02733e+08
G3V9T7	ATPase Asna1 OS=Rattus norvegicus OX=10116 GN=Asna1 PE=1 SV=1	3.91854e+08	4.05012e+08	4.26822e+08	4.02371e+08	4.00859e+08	3.77483e+08	4.0196e+08	3.95468e+08	3.88581e+08	4.20908e+08	4.13507e+08	4.00458e+08	4.18758e+08	4.01998e+08	4.10047e+08
P45479	Palmitoyl-protein thioesterase 1 OS=Rattus norvegicus OX=10116 GN=Ppt1 PE=1 SV=1	3.06914e+08	3.25117e+08	2.88081e+08	2.78426e+08	3.00135e+08	2.62343e+08	2.06954e+08	2.63506e+08	1.8915e+08	2.08987e+08	2.06072e+08	5.05456e+08	3.09433e+08	2.35355e+08	2.48883e+08
Q8CG45	Aflatoxin B1 aldehyde reductase member 2 OS=Rattus norvegicus OX=10116 GN=Akr7a2 PE=1 SV=2	4.55454e+08	4.27876e+08	4.48716e+08	4.79178e+08	4.75399e+08	4.48061e+08	4.24999e+08	4.4128e+08	3.88466e+08	4.47399e+08	4.2279e+08	4.47893e+08	4.29442e+08	4.0002e+08	4.66794e+08
P17220	Proteasome subunit alpha type-2 OS=Rattus norvegicus OX=10116 GN=Psma2 PE=1 SV=3	3.28793e+08	3.256e+08	2.9536e+08	2.84788e+08	2.93855e+08	3.1702e+08	3.50609e+08	2.87473e+08	2.97287e+08	3.56192e+08	3.1971e+08	3.16281e+08	3.25863e+08	2.55426e+08	3.21523e+08
Q63768	Adapter molecule crk OS=Rattus norvegicus OX=10116 GN=Crk PE=1 SV=1	2.39868e+08	1.97858e+08	1.61604e+08	2.47201e+08	2.41067e+08	2.27569e+08	2.34436e+08	188041901	2.34291e+08	2.67597e+08	2.27974e+08	2.25524e+08	1.91476e+08	2.04232e+08	1.80583e+08
P70645	Bleomycin hydrolase OS=Rattus norvegicus OX=10116 GN=Blmh PE=1 SV=1	2.10811e+08	2.44629e+08	2.63667e+08	1.88379e+08	2.33536e+08	2.43871e+08	1.81236e+08	2.37041e+08	2.08086e+08	2.3627e+08	2.23383e+08	2.00859e+08	2.29194e+08	1.53057e+08	1.50203e+08
P09456	cAMP-dependent protein kinase type I-alpha regulatory subunit OS=Rattus norvegicus OX=10116 GN=Prkar1a PE=1 SV=2	2.83959e+08	3.10527e+08	2.94709e+08	3.27943e+08	3.59318e+08	3.98059e+08	3.02789e+08	2.91622e+08	3.11285e+08	3.3068e+08	3.62396e+08	3.56549e+08	3.10631e+08	3.24189e+08	2.90367e+08
P37377	Alpha-synuclein OS=Rattus norvegicus OX=10116 GN=Snca PE=1 SV=1	7.28998e+08	7.10369e+08	7.18323e+08	6.70144e+08	7.16333e+08	6.71395e+08	6.93344e+08	7.34062e+08	1.47139e+09	6.40836e+08	6.55042e+08	5.9609e+08	7.38985e+08	7.27989e+08	7.62505e+08
P15178	Aspartate--tRNA ligase, cytoplasmic OS=Rattus norvegicus OX=10116 GN=Dars PE=1 SV=1	2.85597e+08	2.76304e+08	3.19506e+08	2.71953e+08	2.46357e+08	2.68554e+08	2.70572e+08	2.86017e+08	2.34039e+08	2.8636e+08	2.70578e+08	2.86535e+08	2.83289e+08	2.45303e+08	2.8449e+08
O35509	Ras-related protein Rab-11B OS=Rattus norvegicus OX=10116 GN=Rab11b PE=1 SV=4	1.14298e+09	1.15217e+09	1.1735e+09	1.16329e+09	1.11591e+09	1.15543e+09	1.02142e+09	1.04819e+09	1.08007e+09	1.27655e+09	1.15761e+09	1.14589e+09	1.12053e+09	1.22318e+09	1.21119e+09
Q5U2N3	Membrane-associated phosphatidylinositol transfer protein 1 OS=Rattus norvegicus OX=10116 GN=Pitpnm1 PE=1 SV=1	1.79102e+08	1.90462e+08	1.96873e+08	2.13198e+08	1.73116e+08	1.54819e+08	1.68559e+08	1.71013e+08	1.58339e+08	2.16814e+08	1.91203e+08	1.93948e+08	2.09771e+08	1.87152e+08	2.0225e+08
D3ZHY9	RAS protein activator like 1 (GAP1 like) (Predicted) OS=Rattus norvegicus OX=10116 GN=Rasal1 PE=4 SV=2	3.10824e+08	3.33639e+08	3.51782e+08	3.07723e+08	3.0066e+08	3.00329e+08	2.60127e+08	290348518	2.94169e+08	3.40078e+08	3.02308e+08	2.91887e+08	3.36593e+08	3.64848e+08	3.55043e+08
A0A0G2JVW5	E3 ubiquitin-protein ligase HUWE1 OS=Rattus norvegicus OX=10116 GN=Huwe1 PE=1 SV=1	1.23363e+08	1.34535e+08	1.60017e+08	1.23851e+08	1.58118e+08	1.04004e+08	1.38428e+08	1.55381e+08	1.59478e+08	1.8706e+08	1.38275e+08	1.39393e+08	1.56016e+08	1.45529e+08	1.48305e+08
H1UBN0	Copine-7 OS=Rattus norvegicus OX=10116 GN=Cpne7 PE=1 SV=1	2.43221e+08	2.31893e+08	2.85993e+08	2.465e+08	2.33911e+08	2.02515e+08	2.16859e+08	2.46946e+08	2.18904e+08	1.85303e+08	1.81254e+08	1.9974e+08	2.48329e+08	2.26051e+08	2.92174e+08
A0A097PE04	Cytochrome c oxidase subunit 2 OS=Rattus norvegicus OX=10116 GN=COX2 PE=3 SV=1	2.30161e+09	2.40598e+09	2.16768e+09	2.28269e+09	2.93722e+09	3.3543e+09	2.26972e+09	2.15914e+09	2.58894e+09	3.48681e+09	3.68018e+09	3.31225e+09	2.32753e+09	2.29644e+09	2.24341e+09
D3ZRN3	Actin, beta-like 2 OS=Rattus norvegicus OX=10116 GN=Actbl2 PE=1 SV=1	2.97336e+08	3.31147e+08	4.04531e+08	3.70469e+08	3.19611e+08	2.64526e+08	2.93751e+08	3.79183e+08	3.80181e+08	3.70363e+08	2.97484e+08	3.17503e+08	3.82444e+08	3.88952e+08	4.0504e+08
Q6RUV5	Ras-related C3 botulinum toxin substrate 1 OS=Rattus norvegicus OX=10116 GN=Rac1 PE=1 SV=1	1.08237e+09	1.14421e+09	1.0275e+09	1.15752e+09	1.04083e+09	1.08834e+09	1.05618e+09	1.10957e+09	1.1723e+09	1.01593e+09	1.02636e+09	1.09405e+09	1.13762e+09	1.10593e+09	1.07014e+09
D4A6C5	Rho GTPase-activating protein 1 OS=Rattus norvegicus OX=10116 GN=Arhgap1 PE=1 SV=1	2.08182e+08	2.22993e+08	1.93167e+08	1.88887e+08	1.9899e+08	1.76172e+08	2.11959e+08	2.04188e+08	2.08767e+08	2.27372e+08	2.08463e+08	1.86856e+08	1.99615e+08	1.9344e+08	1.97452e+08
G3V758	Contactin-2 OS=Rattus norvegicus OX=10116 GN=Cntn2 PE=1 SV=1	2.12013e+08	2.12657e+08	2.18785e+08	2.03437e+08	2.14853e+08	1.90319e+08	1.9835e+08	2.02181e+08	2.03411e+08	1.83961e+08	2.14134e+08	2.3438e+08	2.2807e+08	2.26092e+08	2.28968e+08
D3ZI16	COP9 (Constitutive photomorphogenic) homolog, subunit 6 (Arabidopsis thaliana) (Predicted), isoform CRA_a OS=Rattus norvegicus OX=10116 GN=Cops6 PE=1 SV=1	2.54833e+08	2.796e+08	2.90777e+08	2.94915e+08	2.81369e+08	2.08143e+08	2.68377e+08	233884372	2.77096e+08	2.56764e+08	2.77006e+08	2.50771e+08	2.36199e+08	2.02866e+08	2.74692e+08
A0A0G2K6X9	Adenosine kinase OS=Rattus norvegicus OX=10116 GN=Adk PE=1 SV=1	1.97375e+08	2.04945e+08	2.12447e+08	1.88703e+08	2.07413e+08	1.8912e+08	1.84757e+08	204143423	2.08559e+08	1.86697e+08	1.96322e+08	1.72412e+08	2.17898e+08	1.94254e+08	2.05035e+08
P11240	Cytochrome c oxidase subunit 5A, mitochondrial OS=Rattus norvegicus OX=10116 GN=Cox5a PE=1 SV=1	2.26338e+09	2.39691e+09	2.58369e+09	2.53804e+09	2.4839e+09	2.54803e+09	2.2306e+09	2.16177e+09	2.3408e+09	2.32067e+09	2.54444e+09	2.18761e+09	2.56292e+09	2.3765e+09	2.51209e+09
Q4FZT0	Stomatin-like protein 2, mitochondrial OS=Rattus norvegicus OX=10116 GN=Stoml2 PE=1 SV=1	1.48884e+08	1.13931e+08	1.15646e+08	1.52542e+08	1.56671e+08	1.5373e+08	1.11154e+08	1.0644e+08	1.54007e+08	1.66953e+08	1.71964e+08	1.60714e+08	1.28392e+08	1.25598e+08	1.04383e+08
Q5I0D1	Glyoxalase domain-containing protein 4 OS=Rattus norvegicus OX=10116 GN=Glod4 PE=1 SV=1	6.28266e+08	6.40152e+08	6.65656e+08	6.19492e+08	6.03917e+08	5.84584e+08	6.37461e+08	6.07152e+08	5.50684e+08	5.14231e+08	5.11893e+08	5.83667e+08	6.53771e+08	6.66867e+08	6.75357e+08
P04906	Glutathione S-transferase P OS=Rattus norvegicus OX=10116 GN=Gstp1 PE=1 SV=2	1.50692e+09	1.42833e+09	1.31626e+09	1.66908e+09	1.77191e+09	1.99238e+09	1.4662e+09	1.47523e+09	1.39806e+09	1.71098e+09	1.78718e+09	1.92516e+09	1.40386e+09	1.39358e+09	1.31474e+09
Q4KM73	UMP-CMP kinase OS=Rattus norvegicus OX=10116 GN=Cmpk1 PE=1 SV=2	7.54953e+08	7.9299e+08	7.78244e+08	7.45288e+08	7.71763e+08	7.04093e+08	7.75629e+08	728643413	7.88658e+08	7.09306e+08	7.55595e+08	7.65855e+08	7.55728e+08	7.31161e+08	7.34636e+08
A0A0H2UHG3	Cullin-5 OS=Rattus norvegicus OX=10116 GN=Cul5 PE=1 SV=1	2.44866e+08	2.61981e+08	2.87305e+08	2.70764e+08	2.41247e+08	2.72319e+08	2.35922e+08	242048348	2.39389e+08	2.87833e+08	2.84741e+08	2.5137e+08	2.42363e+08	2.49329e+08	2.45981e+08
P23514	Coatomer subunit beta OS=Rattus norvegicus OX=10116 GN=Copb1 PE=1 SV=1	1.46597e+08	1.42147e+08	1.5055e+08	1.47955e+08	1.61006e+08	1.33862e+08	1.43476e+08	144018259	1.35061e+08	1.69099e+08	1.59874e+08	1.31976e+08	1.56349e+08	1.31941e+08	1.60607e+08
B4F768	Aldh4a1 protein (Fragment) OS=Rattus norvegicus OX=10116 GN=Aldh4a1 PE=2 SV=1	2.19711e+08	2.02475e+08	2.10372e+08	2.04253e+08	2.33655e+08	2.40088e+08	2.2397e+08	2.38795e+08	2.0245e+08	2.27444e+08	2.14039e+08	2.44828e+08	1.97968e+08	2.0754e+08	2.24563e+08
G3V792	Cytoplasmic dynein 1 intermediate chain 1 OS=Rattus norvegicus OX=10116 GN=Dync1i1 PE=1 SV=3	1.33541e+08	1.29376e+08	1.10267e+08	1.23812e+08	1.43402e+08	1.43935e+08	1.37151e+08	1.14471e+08	1.21635e+08	1.52237e+08	1.62391e+08	1.33017e+08	1.36638e+08	1.25823e+08	1.12117e+08
Q9Z269	Vesicle-associated membrane protein-associated protein B OS=Rattus norvegicus OX=10116 GN=Vapb PE=1 SV=3	3.31049e+08	3.22583e+08	3.11425e+08	2.96779e+08	3.13023e+08	3.00222e+08	2.76684e+08	3.0881e+08	2.86016e+08	3.4165e+08	3.17138e+08	3.19443e+08	3.19244e+08	2.96567e+08	3.73889e+08
Q68FR9	Elongation factor 1-delta OS=Rattus norvegicus OX=10116 GN=Eef1d PE=1 SV=2	1.83759e+08	2.07651e+08	1.91912e+08	1.94633e+08	2.51387e+08	2.26525e+08	2.62461e+08	1.71824e+08	1.71411e+08	1.87766e+08	1.76823e+08	1.91196e+08	1.81185e+08	1.77624e+08	1.75092e+08
Q9QYL8	Acyl-protein thioesterase 2 OS=Rattus norvegicus OX=10116 GN=Lypla2 PE=1 SV=1	1.21656e+08	1.42984e+08	1.1582e+08	1.05704e+08	1.38925e+08	1.15362e+08	1.32427e+08	1.13057e+08	1.40177e+08	1.392e+08	1.25868e+08	1.04599e+08	1.1542e+08	1.12449e+08	1.19552e+08
A0A0G2K2B3	Far upstream element-binding protein 2 OS=Rattus norvegicus OX=10116 GN=Khsrp PE=1 SV=1	1.93018e+08	2.0486e+08	1.81125e+08	1.83412e+08	1.99303e+08	1.49502e+08	1.91235e+08	2.11926e+08	1.92778e+08	1.70249e+08	1.70813e+08	1.84712e+08	1.97274e+08	1.9597e+08	2.11088e+08
Q99N27	Sorting nexin-1 OS=Rattus norvegicus OX=10116 GN=Snx1 PE=1 SV=1	2.11673e+08	1.84052e+08	2.13239e+08	2.19734e+08	2.31824e+08	2.51066e+08	1.65474e+08	2.02605e+08	1.65006e+08	2.86681e+08	2.57171e+08	2.65155e+08	2.14132e+08	2.1092e+08	2.25684e+08
Q63941	Ras-related protein Rab-3B OS=Rattus norvegicus OX=10116 GN=Rab3b PE=1 SV=2	2.16377e+08	2.04743e+08	2.17412e+08	2.27326e+08	2.26814e+08	2.23183e+08	2.24918e+08	2.029e+08	2.53759e+08	2.5624e+08	2.11204e+08	1.9374e+08	1.94312e+08	2.15144e+08	2.14838e+08
Q5XIG8	Serine-threonine kinase receptor-associated protein OS=Rattus norvegicus OX=10116 GN=Strap PE=1 SV=1	2.72087e+08	2.89839e+08	2.6206e+08	2.67401e+08	2.81542e+08	2.43701e+08	2.75574e+08	2.59569e+08	2.3268e+08	2.6722e+08	2.56787e+08	2.7751e+08	2.75232e+08	2.72325e+08	2.81313e+08
A0A1W2Q6C8	Glial fibrillary acidic protein (Fragment) OS=Rattus norvegicus OX=10116 GN=Gfap PE=1 SV=1	1.52125e+07	1.82554e+07	1.11131e+07	1.35848e+07	1.19055e+07	1.48077e+07	2.22256e+07	20162716	1.33074e+07	1.80886e+07	9.21248e+06	1.67355e+07	1.40716e+07	1.82476e+07	1.52908e+07
A0A0H2UHZ2	Nucleosome assembly protein 1-like 4 OS=Rattus norvegicus OX=10116 GN=Nap1l4 PE=1 SV=1	2.33509e+08	2.64026e+08	2.14327e+08	2.31176e+08	2.19647e+08	2.3119e+08	2.3837e+08	2.37732e+08	2.43716e+08	2.29123e+08	2.036e+08	5.22184e+08	2.64131e+08	2.08703e+08	2.22192e+08
P48768	Sodium/calcium exchanger 2 OS=Rattus norvegicus OX=10116 GN=Slc8a2 PE=1 SV=1	4.01612e+08	3.73583e+08	3.85505e+08	3.521e+08	3.44972e+08	3.0448e+08	3.71103e+08	3.62295e+08	5.54486e+08	3.92431e+08	3.41627e+08	3.50815e+08	3.95891e+08	3.56221e+08	3.86456e+08
P70580	Membrane-associated progesterone receptor component 1 OS=Rattus norvegicus OX=10116 GN=Pgrmc1 PE=1 SV=3	7.95041e+08	8.02805e+08	7.86389e+08	8.48738e+08	8.68454e+08	7.97841e+08	7.1663e+08	7.49811e+08	6.6466e+08	9.94779e+08	8.72107e+08	8.34611e+08	7.63428e+08	7.37381e+08	7.93718e+08
P60905	DnaJ homolog subfamily C member 5 OS=Rattus norvegicus OX=10116 GN=Dnajc5 PE=1 SV=1	7.58457e+08	7.62649e+08	8.42074e+08	8.90678e+08	8.11439e+08	9.90794e+08	8.27716e+08	791569919	8.34919e+08	8.27022e+08	7.60583e+08	6.25486e+08	7.35206e+08	7.17994e+08	8.27031e+08
Q9JLA3	UDP-glucose:glycoprotein glucosyltransferase 1 OS=Rattus norvegicus OX=10116 GN=Uggt1 PE=1 SV=2	1.11164e+08	9.54173e+07	1.14062e+08	1.05497e+08	1.01837e+08	8.69931e+07	1.07108e+08	1.18464e+08	1.03197e+08	1.10297e+08	7.93515e+07	9.90536e+07	1.10019e+08	1.0075e+08	1.14639e+08
B0BNE5	S-formylglutathione hydrolase OS=Rattus norvegicus OX=10116 GN=Esd PE=2 SV=1	3.52413e+08	3.7314e+08	3.80693e+08	3.6293e+08	3.38537e+08	3.54993e+08	3.65197e+08	3.5842e+08	3.22361e+08	3.06985e+08	2.7688e+08	2.93573e+08	3.53042e+08	3.64463e+08	3.87652e+08
Q6PCU0	ATP synthase subunit gamma OS=Rattus norvegicus OX=10116 GN=Atp5f1c PE=1 SV=1	3.1245e+09	3.23008e+09	3.18239e+09	2.82312e+09	3.03664e+09	2.8601e+09	3.14538e+09	3.02609e+09	3.22076e+09	2.97408e+09	3.08479e+09	2.92227e+09	3.13739e+09	3.06179e+09	3.01057e+09
A0A0H2UHX3	40S ribosomal protein S4 OS=Rattus norvegicus OX=10116 GN=Rps4x PE=3 SV=1	6.81942e+08	7.0705e+08	7.89234e+08	8.10253e+08	7.48486e+08	6.64079e+08	7.4417e+08	7.04001e+08	6.7e+08	9.38855e+08	8.08699e+08	8.13288e+08	7.53044e+08	6.63598e+08	9.15324e+08
Q63372	Neurexin-1 OS=Rattus norvegicus OX=10116 GN=Nrxn1 PE=1 SV=3	1.64593e+08	9.97839e+07	1.41143e+08	9.94835e+07	9.7913e+07	9.63502e+07	1.17911e+08	1.39649e+08	1.44383e+08	1.05364e+08	1.43404e+08	1.14643e+08	1.4472e+08	9.13817e+07	1.01455e+08
A0A0G2K079	Breast carcinoma-amplified sequence 1 homolog OS=Rattus norvegicus OX=10116 GN=Bcas1 PE=1 SV=1	4.69751e+08	4.62706e+08	4.55828e+08	6.28294e+08	5.76711e+08	6.44037e+08	4.59025e+08	511194635	4.78224e+08	4.5288e+08	6.15112e+08	7.22471e+08	4.88101e+08	5.24177e+08	4.84279e+08
D3ZJR1	Epidermal growth factor receptor pathway substrate 15-like 1 OS=Rattus norvegicus OX=10116 GN=Eps15l1 PE=1 SV=3	2.09189e+08	2.12874e+08	2.04428e+08	1.8046e+08	2.37044e+08	2.08227e+08	2.08338e+08	2.17732e+08	2.39837e+08	2.25176e+08	1.79882e+08	2.0769e+08	1.89795e+08	1.89072e+08	1.70049e+08
M0RB22	Protein tyrosine phosphatase, receptor type, D OS=Rattus norvegicus OX=10116 GN=Ptprd PE=1 SV=2	3.86787e+07	3.37043e+07	3.51034e+07	3.99508e+07	4.16943e+07	4.28113e+07	4.00742e+07	3.47154e+07	4.18958e+07	4.73703e+07	4.35348e+07	4.88717e+07	3.78787e+07	4.6657e+07	3.76322e+07
D3ZFQ8	Cytochrome c-1 OS=Rattus norvegicus OX=10116 GN=Cyc1 PE=1 SV=3	1.36745e+09	1.50014e+09	1.36789e+09	1.41522e+09	1.36856e+09	1.36953e+09	1.46468e+09	1.4331e+09	1.50412e+09	1.28551e+09	1.40296e+09	1.54926e+09	1.42319e+09	1.37924e+09	1.37292e+09
A0A0G2JZ23	Ras-specific guanine nucleotide-releasing factor 1 OS=Rattus norvegicus OX=10116 GN=Rasgrf1 PE=4 SV=1	1.01202e+08	1.13105e+08	1.29022e+08	1.07277e+08	8.46661e+07	8.9859e+07	1.08948e+08	6.95951e+07	7.95583e+07	1.10295e+08	9.77066e+07	8.22172e+07	1.09915e+08	9.94042e+07	1.0538e+08
P19234	NADH dehydrogenase [ubiquinone] flavoprotein 2, mitochondrial OS=Rattus norvegicus OX=10116 GN=Ndufv2 PE=1 SV=2	8.7555e+08	8.93486e+08	9.21418e+08	8.55197e+08	8.56574e+08	8.4809e+08	8.66069e+08	8.66227e+08	8.95592e+08	9.05511e+08	9.19302e+08	9.34176e+08	9.12042e+08	8.62911e+08	9.09291e+08
Q8CFN2	Cell division control protein 42 homolog OS=Rattus norvegicus OX=10116 GN=Cdc42 PE=1 SV=2	2.8408e+08	3.2029e+08	3.3362e+08	3.34062e+08	3.1324e+08	3.49175e+08	3.52541e+08	331162878	3.20148e+08	3.3992e+08	3.46725e+08	3.24393e+08	3.21612e+08	3.38668e+08	3.26001e+08
O35353	Guanine nucleotide-binding protein subunit beta-4 OS=Rattus norvegicus OX=10116 GN=Gnb4 PE=2 SV=4	3.92415e+07	3.6767e+07	3.56363e+07	3.72535e+07	4.78253e+07	4.48812e+07	5.1894e+07	47520326	4.9735e+07	4.28731e+07	4.70959e+07	2.96113e+07	4.04083e+07	3.45058e+07	3.98832e+07
M0RC65	Cofilin 2 OS=Rattus norvegicus OX=10116 GN=Cfl2 PE=1 SV=1	1.48423e+08	1.73507e+08	1.67308e+08	1.33359e+08	1.89764e+08	1.81536e+08	2.06479e+08	1.36749e+08	1.86952e+08	1.35602e+08	1.76255e+08	1.5438e+08	1.6032e+08	1.38586e+08	1.30439e+08
F1LMM8	[Pyruvate dehydrogenase (acetyl-transferring)] kinase isozyme 2, mitochondrial OS=Rattus norvegicus OX=10116 GN=Pdk2 PE=1 SV=3	6.41389e+07	7.95352e+07	6.03716e+07	6.19562e+07	7.81401e+07	7.3891e+07	6.23765e+07	75848054	9.45571e+07	8.49199e+07	8.81551e+07	6.41392e+07	9.57195e+07	7.23019e+07	7.15918e+07
P45953	Very long-chain specific acyl-CoA dehydrogenase, mitochondrial OS=Rattus norvegicus OX=10116 GN=Acadvl PE=1 SV=1	2.20859e+08	2.72599e+08	2.74189e+08	2.72818e+08	3.13634e+08	3.08995e+08	2.35228e+08	2.52788e+08	2.20249e+08	3.07471e+08	3.11622e+08	2.58371e+08	2.67439e+08	2.22377e+08	2.81818e+08
P09527	Ras-related protein Rab-7a OS=Rattus norvegicus OX=10116 GN=Rab7a PE=1 SV=2	8.5302e+08	8.28707e+08	8.28871e+08	7.84862e+08	7.83477e+08	8.00886e+08	8.10939e+08	771093510	7.91418e+08	9.13176e+08	8.50437e+08	8.54766e+08	8.67187e+08	8.20043e+08	8.02622e+08
B2RYQ2	Serine/threonine-protein phosphatase 2A activator OS=Rattus norvegicus OX=10116 GN=Ptpa PE=1 SV=1	6.15276e+08	5.0003e+08	6.3828e+08	4.65591e+08	4.98966e+08	5.40924e+08	4.7406e+08	4.74873e+08	4.31887e+08	5.21315e+08	6.29931e+08	4.96108e+08	6.22469e+08	4.85216e+08	5.30224e+08
A0A0G2JXC7	Actin-binding LIM protein 2 OS=Rattus norvegicus OX=10116 GN=Ablim2 PE=1 SV=1	1.68689e+08	1.77106e+08	1.73844e+08	2.06791e+08	1.76942e+08	1.96307e+08	1.9995e+08	2.00866e+08	1.52384e+08	1.90688e+08	1.83037e+08	2.0927e+08	1.82416e+08	1.75538e+08	1.39837e+08
Q5PQK2	FUS RNA-binding protein OS=Rattus norvegicus OX=10116 GN=Fus PE=1 SV=1	4.61089e+08	4.29253e+08	6.5261e+08	4.62702e+08	4.69574e+08	4.68242e+08	4.31829e+08	4.55021e+08	4.5495e+08	4.86719e+08	4.79435e+08	4.41601e+08	4.51617e+08	6.50367e+08	4.2771e+08
F1LRI5	GCN1 eIF2 alpha kinase activator-like 1 OS=Rattus norvegicus OX=10116 GN=Gcn1l1 PE=1 SV=3	1.19915e+08	1.17514e+08	1.13083e+08	1.19205e+08	1.38419e+08	1.08968e+08	1.20439e+08	1.18392e+08	8.46796e+07	1.36828e+08	1.1037e+08	1.15022e+08	1.11595e+08	1.31017e+08	1.43475e+08
F1LMH0	Neuronal-specific septin-3 OS=Rattus norvegicus OX=10116 GN=Sept3 PE=3 SV=1	5.83706e+08	5.72767e+08	7.83893e+08	6.90605e+08	5.44344e+08	4.32569e+08	5.50413e+08	6.60044e+08	7.57462e+08	4.3899e+08	3.16238e+08	5.58991e+08	5.42157e+08	7.37179e+08	7.58465e+08
A0A0G2JSI1	4-trimethylaminobutyraldehyde dehydrogenase OS=Rattus norvegicus OX=10116 GN=Aldh9a1 PE=1 SV=1	6.71373e+08	7.54931e+08	7.72159e+08	8.96313e+08	7.90602e+08	7.74154e+08	6.40346e+08	710536117	6.21349e+08	8.0724e+08	7.08601e+08	6.30107e+08	6.37679e+08	7.09627e+08	8.72139e+08
Q9WVR7	Protein phosphatase 1F OS=Rattus norvegicus OX=10116 GN=Ppm1f PE=2 SV=1	1.75012e+08	1.51469e+08	1.05967e+08	1.67963e+08	1.67731e+08	1.76394e+08	1.75737e+08	203549371	1.55603e+08	1.88929e+08	1.69093e+08	1.8916e+08	1.53206e+08	1.59716e+08	1.60161e+08
B2RYP4	Sorting nexin 2 OS=Rattus norvegicus OX=10116 GN=Snx2 PE=1 SV=1	1.80751e+08	1.8806e+08	1.6026e+08	1.94604e+08	1.61684e+08	2.0023e+08	1.8371e+08	183009608	1.60645e+08	1.5656e+08	1.50911e+08	1.40442e+08	1.83078e+08	1.50574e+08	1.98175e+08
B5DFC3	SEC23A (S. cerevisiae) (Predicted) OS=Rattus norvegicus OX=10116 GN=Sec23a PE=1 SV=1	9.49807e+07	1.26414e+08	9.16938e+07	8.70478e+07	9.295e+07	1.45242e+08	9.81216e+07	1.10836e+08	1.07086e+08	1.18657e+08	1.11739e+08	9.86019e+07	9.44378e+07	8.51469e+07	9.62379e+07
A0A0G2K1M2	Disks large homolog 1 OS=Rattus norvegicus OX=10116 GN=Dlg1 PE=1 SV=1	2.50365e+08	2.41673e+08	2.57094e+08	2.52864e+08	2.72475e+08	2.54578e+08	2.30801e+08	2.17512e+08	2.44796e+08	2.39747e+08	2.31002e+08	2.62531e+08	2.3786e+08	2.32953e+08	2.17051e+08
A0JN17	V-Ki-ras2 Kirsten rat sarcoma viral oncogene homolog OS=Rattus norvegicus OX=10116 GN=Kras PE=2 SV=1	2.17573e+08	1.78879e+08	1.65446e+08	2.49584e+08	2.34833e+08	2.27358e+08	1.95075e+08	169928862	2.20988e+08	2.21612e+08	1.92185e+08	2.61125e+08	2.00422e+08	2.01659e+08	1.72621e+08
Q63610	Tropomyosin alpha-3 chain OS=Rattus norvegicus OX=10116 GN=Tpm3 PE=1 SV=2	2.7074e+08	2.71695e+08	3.04627e+08	2.8826e+08	2.40675e+08	3.16083e+08	2.65286e+08	282693288	2.62124e+08	2.59554e+08	2.64036e+08	2.71846e+08	2.62721e+08	2.87151e+08	2.57032e+08
A0A0G2JSM8	Cell division control protein 42 homolog OS=Rattus norvegicus OX=10116 GN=Cdc42 PE=1 SV=1	2.79908e+08	2.81478e+08	2.61424e+08	2.80242e+08	2.55286e+08	2.65917e+08	2.67301e+08	244945398	2.83661e+08	2.56793e+08	2.77749e+08	2.54128e+08	2.79547e+08	2.24896e+08	2.70462e+08
P51635	Alcohol dehydrogenase [NADP(+)] OS=Rattus norvegicus OX=10116 GN=Akr1a1 PE=1 SV=2	1.06493e+09	1.05558e+09	1.06375e+09	1.01525e+09	9.37746e+08	1.09836e+09	1.04923e+09	1019019811	9.41703e+08	1.1485e+09	1.09907e+09	1.14175e+09	9.90062e+08	1.03427e+09	1.09908e+09
Q63754	Beta-synuclein OS=Rattus norvegicus OX=10116 GN=Sncb PE=1 SV=1	1.75205e+09	1.76784e+09	1.69816e+09	1.59526e+09	1.84775e+09	1.72246e+09	1.80278e+09	1610075450	1.83152e+09	1.5165e+09	1.85845e+09	1.59092e+09	1.7662e+09	1.61062e+09	1.64849e+09
P42346	Serine/threonine-protein kinase mTOR OS=Rattus norvegicus OX=10116 GN=Mtor PE=1 SV=1	8.28245e+07	1.04545e+08	1.13206e+08	1.05384e+08	8.28149e+07	7.66382e+07	5.86769e+07	6.82448e+07	7.90717e+07	1.0876e+08	1.02874e+08	9.25625e+07	1.14088e+08	9.01936e+07	1.06035e+08
P62882	Guanine nucleotide-binding protein subunit beta-5 OS=Rattus norvegicus OX=10116 GN=Gnb5 PE=2 SV=1	3.65622e+08	3.80921e+08	4.13366e+08	3.82386e+08	3.58503e+08	3.16366e+08	3.72698e+08	3.49379e+08	4.20178e+08	3.51974e+08	3.60052e+08	3.83263e+08	3.98727e+08	3.78211e+08	4.06996e+08
P09034	Argininosuccinate synthase OS=Rattus norvegicus OX=10116 GN=Ass1 PE=1 SV=1	6.13924e+08	6.3748e+08	6.8596e+08	6.37272e+08	5.88799e+08	5.8218e+08	5.98801e+08	5.89434e+08	4.86861e+08	6.10816e+08	5.57511e+08	5.60987e+08	6.29007e+08	5.89446e+08	6.38899e+08
B2GVB4	Sept9 protein (Fragment) OS=Rattus norvegicus OX=10116 GN=Sept9 PE=2 SV=1	2.45877e+08	2.64577e+08	2.56042e+08	2.78214e+08	2.82115e+08	2.7848e+08	2.46079e+08	2.20531e+08	2.65062e+08	3.65649e+08	2.59158e+08	2.38229e+08	2.53452e+08	2.64939e+08	2.30761e+08
Q6NYB7	Ras-related protein Rab-1A OS=Rattus norvegicus OX=10116 GN=Rab1A PE=1 SV=3	2.17447e+08	2.57033e+08	2.16651e+08	1.99419e+08	2.35359e+08	2.21655e+08	2.3153e+08	2.08452e+08	2.21665e+08	2.5717e+08	2.38662e+08	2.25678e+08	2.37346e+08	2.31596e+08	2.29279e+08
Q6URK4	Heterogeneous nuclear ribonucleoprotein A3 OS=Rattus norvegicus OX=10116 GN=Hnrnpa3 PE=1 SV=1	3.21961e+08	3.31638e+08	3.46557e+08	3.13467e+08	5.2285e+08	5.81629e+08	5.6349e+08	319954148	5.16141e+08	4.17206e+08	5.36463e+08	2.88116e+08	3.31724e+08	4.23563e+08	5.8977e+08
G3V624	Coronin OS=Rattus norvegicus OX=10116 GN=Coro1c PE=1 SV=1	5.91915e+08	6.96083e+08	7.16407e+08	7.12368e+08	6.11686e+08	6.39123e+08	6.00262e+08	566948093	5.59516e+08	7.04654e+08	6.8623e+08	6.34838e+08	6.02579e+08	6.4852e+08	6.94851e+08
Q5XIE6	3-hydroxyisobutyryl-CoA hydrolase, mitochondrial OS=Rattus norvegicus OX=10116 GN=Hibch PE=1 SV=2	1.18678e+08	1.24958e+08	1.25436e+08	1.11311e+08	1.15134e+08	1.04963e+08	1.10504e+08	1.05226e+08	1.0985e+08	1.22735e+08	1.14383e+08	1.19953e+08	9.36625e+07	1.23171e+08	1.12996e+08
Q5M9H7	DnaJ (Hsp40) homolog, subfamily A, member 2 OS=Rattus norvegicus OX=10116 GN=Dnaja2 PE=1 SV=1	1.86037e+08	1.97978e+08	1.90362e+08	2.09549e+08	2.43041e+08	2.64142e+08	2.15558e+08	1.504e+08	2.02827e+08	3.03434e+08	2.76028e+08	2.30419e+08	2.07301e+08	1.82877e+08	1.82758e+08
P63036	DnaJ homolog subfamily A member 1 OS=Rattus norvegicus OX=10116 GN=Dnaja1 PE=1 SV=1	3.24744e+08	3.26457e+08	3.362e+08	2.85954e+08	3.06721e+08	2.82044e+08	3.24258e+08	2.97219e+08	2.91324e+08	3.54455e+08	2.94744e+08	3.07693e+08	2.95694e+08	3.04072e+08	3.07332e+08
P56603	Secretory carrier-associated membrane protein 1 OS=Rattus norvegicus OX=10116 GN=Scamp1 PE=1 SV=1	3.77403e+08	4.00065e+08	4.33298e+08	4.44835e+08	3.96328e+08	3.78624e+08	3.73172e+08	377179816	3.88647e+08	4.59725e+08	4.17482e+08	3.76551e+08	4.39461e+08	4.02355e+08	4.23192e+08
Q62636	Ras-related protein Rap-1b OS=Rattus norvegicus OX=10116 GN=Rap1b PE=1 SV=2	1.42701e+08	2.02899e+08	2.16853e+08	2.22443e+08	1.95308e+08	2.08778e+08	1.85614e+08	1.51869e+08	1.89498e+08	1.71311e+08	1.93138e+08	1.99262e+08	1.97678e+08	1.84367e+08	1.8042e+08
P62747	Rho-related GTP-binding protein RhoB OS=Rattus norvegicus OX=10116 GN=Rhob PE=1 SV=1	5.33935e+08	5.25539e+08	5.82927e+08	5.48688e+08	5.13606e+08	4.72896e+08	4.80529e+08	515570879	5.0631e+08	5.3453e+08	7.37757e+08	1.0041e+09	4.94156e+08	5.41548e+08	5.29008e+08
P01830	Thy-1 membrane glycoprotein OS=Rattus norvegicus OX=10116 GN=Thy1 PE=1 SV=1	4.36235e+09	4.50751e+09	4.73284e+09	4.64755e+09	4.56204e+09	4.1764e+09	4.15798e+09	4.40197e+09	4.87455e+09	4.53341e+09	4.77111e+09	4.63687e+09	4.44626e+09	4.55148e+09	4.62541e+09
M0RBL8	Transcription elongation factor A (SII)-like 6 OS=Rattus norvegicus OX=10116 GN=Tceal6 PE=1 SV=1	6.85634e+08	5.97078e+08	5.63784e+08	7.58429e+08	8.233e+08	8.69185e+08	5.6937e+08	5.25648e+08	7.11019e+08	9.55419e+08	9.01241e+08	8.62904e+08	6.59416e+08	6.10652e+08	5.61866e+08
P61589	Transforming protein RhoA OS=Rattus norvegicus OX=10116 GN=Rhoa PE=1 SV=1	1.04567e+09	1.11547e+09	1.08143e+09	1.12186e+09	1.04458e+09	1.14112e+09	1.01859e+09	1088959013	9.98864e+08	1.10606e+09	9.94549e+08	1.05888e+09	1.13295e+09	1.0072e+09	1.39174e+09
D3ZCA0	Pyridoxal phosphate homeostasis protein OS=Rattus norvegicus OX=10116 GN=Plpbp PE=1 SV=1	4.29633e+08	4.20597e+08	4.00596e+08	3.86101e+08	4.13952e+08	3.78746e+08	4.19416e+08	393502949	3.92959e+08	4.66845e+08	4.01019e+08	3.95511e+08	3.95701e+08	4.35289e+08	3.67628e+08
Q5M960	Lsamp protein OS=Rattus norvegicus OX=10116 GN=Lsamp PE=2 SV=1	9.05684e+08	9.91722e+08	8.89847e+08	8.63169e+08	9.86437e+08	9.60039e+08	8.64743e+08	9.01863e+08	9.0483e+08	9.26834e+08	9.57526e+08	8.71489e+08	9.53187e+08	9.60715e+08	9.34914e+08
D3ZIE9	Delta-1-pyrroline-5-carboxylate synthase OS=Rattus norvegicus OX=10116 GN=Aldh18a1 PE=3 SV=1	1.81146e+08	1.80868e+08	1.91329e+08	1.83703e+08	1.50596e+08	1.81593e+08	1.37101e+08	1.91475e+08	1.67098e+08	1.66962e+08	1.94884e+08	1.85641e+08	2.06957e+08	1.43304e+08	2.0129e+08
Q32PX6	Ras homolog family member G OS=Rattus norvegicus OX=10116 GN=Rhog PE=1 SV=1	4.42782e+08	4.64923e+08	5.04226e+08	5.39828e+08	5.01166e+08	5.18745e+08	4.82692e+08	512710254	4.49483e+08	3.35283e+08	4.77539e+08	5.01548e+08	4.59156e+08	4.96047e+08	4.67583e+08
A0A0U1RS25	UPF1, RNA helicase and ATPase OS=Rattus norvegicus OX=10116 GN=Upf1 PE=1 SV=1	9.19076e+07	8.6554e+07	8.63341e+07	9.06696e+07	1.0044e+08	9.28708e+07	8.11771e+07	9.92708e+07	8.31694e+07	8.91918e+07	9.11579e+07	9.45574e+07	8.04043e+07	8.2123e+07	6.07927e+07
G3V6L9	Peptidylprolyl isomerase OS=Rattus norvegicus OX=10116 GN=Fkbp3 PE=1 SV=1	3.17614e+08	3.13369e+08	3.20031e+08	2.90111e+08	2.73603e+08	2.65637e+08	2.88477e+08	3.06867e+08	2.26929e+08	3.16607e+08	3.03348e+08	2.57949e+08	3.0906e+08	2.78122e+08	2.93979e+08
A0A0G2K7M1	Glyceraldehyde-3-phosphate dehydrogenase OS=Rattus norvegicus OX=10116 PE=1 SV=1	4.42374e+07	5.25872e+07	5.87028e+07	5.42432e+07	4.97124e+07	3.61591e+07	5.38723e+07	48506446	3.76032e+07	5.15057e+07	4.31641e+07	4.78337e+07	4.83878e+07	5.75967e+07	5.65252e+07
A0A0G2K336	Aquaporin-4 OS=Rattus norvegicus OX=10116 GN=Aqp4 PE=1 SV=1	7.82332e+08	8.08018e+08	7.5649e+08	7.53986e+08	7.45863e+08	7.56782e+08	7.89408e+08	7.61367e+08	7.07081e+08	9.82684e+08	8.96012e+08	9.59338e+08	7.96517e+08	7.69734e+08	8.84733e+08
O08700	Vacuolar protein sorting-associated protein 45 OS=Rattus norvegicus OX=10116 GN=Vps45 PE=1 SV=1	2.26545e+08	2.14012e+08	2.11811e+08	2.00469e+08	2.04107e+08	1.92649e+08	2.02469e+08	2.04116e+08	1.73097e+08	2.14159e+08	2.0659e+08	2.04648e+08	2.05304e+08	1.66803e+08	2.03459e+08
A0A0G2JWK7	Transgelin OS=Rattus norvegicus OX=10116 GN=Tagln PE=1 SV=1	1.50232e+08	1.81543e+08	2.14834e+08	2.80785e+08	1.79541e+09	2.03853e+09	1.57379e+08	2820534402	8.31723e+08	1.50543e+08	1.21808e+08	1.39239e+08	1.82361e+08	1.94954e+08	1.81991e+08
Q4FZT2	Protein phosphatase methylesterase 1 OS=Rattus norvegicus OX=10116 GN=Ppme1 PE=1 SV=2	3.50924e+08	3.46728e+08	3.65661e+08	3.5067e+08	2.31339e+08	3.13549e+08	3.46195e+08	3.46833e+08	3.52827e+08	3.73174e+08	2.53401e+08	3.44927e+08	3.53972e+08	3.35913e+08	3.5979e+08
P18265	Glycogen synthase kinase-3 alpha OS=Rattus norvegicus OX=10116 GN=Gsk3a PE=1 SV=1	1.23408e+08	1.2599e+08	1.42628e+08	1.27803e+08	1.27581e+08	1.10327e+08	1.1693e+08	1.11964e+08	1.24068e+08	1.30854e+08	1.23148e+08	1.29635e+08	1.28492e+08	1.14161e+08	1.35475e+08
A0A0G2JV31	X-prolyl aminopeptidase (Aminopeptidase P) 1, soluble, isoform CRA_a OS=Rattus norvegicus OX=10116 GN=Xpnpep1 PE=1 SV=1	1.96312e+08	2.06911e+08	2.50894e+08	2.40131e+08	2.15256e+08	2.24019e+08	1.61997e+08	2.11715e+08	1.90333e+08	1.94769e+08	1.90875e+08	2.08478e+08	2.10066e+08	2.23332e+08	2.21662e+08
D3ZWX4	NCK-interacting protein with SH3 domain OS=Rattus norvegicus OX=10116 GN=Nckipsd PE=1 SV=3	2.2267e+08	2.15091e+08	2.25417e+08	2.09484e+08	2.48878e+08	2.1077e+08	2.34797e+08	2.25642e+08	2.41005e+08	2.10718e+08	2.47511e+08	2.06564e+08	2.34073e+08	2.16764e+08	2.20133e+08
A0A140TAH1	Hepatocyte growth factor-regulated tyrosine kinase substrate OS=Rattus norvegicus OX=10116 GN=Hgs PE=1 SV=1	2.04523e+08	2.13708e+08	2.18295e+08	2.61867e+08	2.03013e+08	2.33489e+08	2.24888e+08	2.13553e+08	2.00798e+08	2.05049e+08	2.5042e+08	2.48667e+08	2.42811e+08	1.99448e+08	2.19473e+08
B2RZ72	Actin-related protein 2/3 complex subunit 4 OS=Rattus norvegicus OX=10116 GN=Arpc4 PE=1 SV=1	4.68e+08	4.92688e+08	4.87142e+08	4.75706e+08	4.91379e+08	4.42319e+08	4.55297e+08	4.43383e+08	6.09446e+08	4.7509e+08	4.36444e+08	4.82085e+08	4.54976e+08	4.77841e+08	4.6183e+08
Q62698	Cytoplasmic dynein 1 light intermediate chain 2 OS=Rattus norvegicus OX=10116 GN=Dync1li2 PE=1 SV=1	1.70335e+08	1.96454e+08	1.74665e+08	2.07412e+08	1.8865e+08	1.83671e+08	1.60298e+08	1.9982e+08	1.69199e+08	1.95785e+08	1.79514e+08	2.00477e+08	2.09578e+08	2.0648e+08	1.73981e+08
P68101	Eukaryotic translation initiation factor 2 subunit 1 OS=Rattus norvegicus OX=10116 GN=Eif2s1 PE=1 SV=2	2.54874e+08	2.85319e+08	3.09362e+08	2.55825e+08	2.49047e+08	2.71153e+08	2.50823e+08	2.85369e+08	2.70945e+08	2.99545e+08	2.6277e+08	2.31151e+08	2.85948e+08	2.31587e+08	2.60591e+08
A0A0G2JY22	Disco-interacting protein 2 homolog B OS=Rattus norvegicus OX=10116 GN=Dip2b PE=1 SV=1	5.26458e+07	6.01657e+07	6.76214e+07	6.10477e+07	4.93459e+07	3.59396e+07	5.63762e+07	6.01279e+07	5.43681e+07	5.22885e+07	4.22744e+07	6.42679e+07	5.8942e+07	7.59958e+07	6.61142e+07
A0A0G2K5L2	RCG47744, isoform CRA_c OS=Rattus norvegicus OX=10116 GN=LOC100911440 PE=1 SV=1	5.71783e+08	6.18387e+08	6.06827e+08	6.78793e+08	7.82267e+08	7.93069e+08	5.61757e+08	5.53302e+08	6.50846e+08	7.74522e+08	8.26125e+08	8.64383e+08	6.35622e+08	5.74587e+08	5.70608e+08
A0A0G2JSH4	Glycogen synthase kinase 3 beta, isoform CRA_b OS=Rattus norvegicus OX=10116 GN=Gsk3b PE=1 SV=1	6.01848e+06	7.78011e+06	1.02424e+07	6.57279e+06	7.07179e+06	5.40702e+06	7.23216e+06	3250308	9.49521e+06	6.94e+06	7.54596e+06	5.95747e+06	9.03595e+06	5.61428e+06	1.16715e+07
F1LM09	Ubiquitin carboxyl-terminal hydrolase 7 OS=Rattus norvegicus OX=10116 GN=Usp7 PE=1 SV=2	1.45734e+08	1.38816e+08	1.23462e+08	1.20757e+08	1.26222e+08	1.02097e+08	1.3519e+08	129632033	1.54899e+08	1.21808e+08	1.07372e+08	1.30048e+08	1.31391e+08	1.17358e+08	1.22572e+08
E9PSK7	C-Jun-amino-terminal kinase-interacting protein 3 OS=Rattus norvegicus OX=10116 GN=Mapk8ip3 PE=1 SV=2	1.2816e+08	1.39517e+08	1.29327e+08	8.08113e+07	7.72887e+07	9.97991e+07	9.59535e+07	1.03947e+08	6.21113e+07	1.1352e+08	9.07562e+07	1.14935e+08	1.03134e+08	1.09605e+08	1.04025e+08
Q9EQS0	Transaldolase OS=Rattus norvegicus OX=10116 GN=Taldo1 PE=1 SV=2	1.75676e+09	1.9295e+09	1.93598e+09	1.78581e+09	1.71327e+09	1.66021e+09	1.80145e+09	1.80326e+09	1.84263e+09	1.63983e+09	1.6874e+09	1.70229e+09	1.86881e+09	1.77709e+09	1.87877e+09
Q9QXY2	SRC kinase signaling inhibitor 1 OS=Rattus norvegicus OX=10116 GN=Srcin1 PE=1 SV=1	8.92046e+07	9.88516e+07	9.56344e+07	9.84811e+07	1.15374e+08	1.07185e+08	6.75666e+07	106870093	3.03291e+08	8.10967e+07	4.64263e+07	6.42045e+07	7.77566e+07	7.6808e+07	8.69495e+07
Q3ZAU6	RBR-type E3 ubiquitin transferase OS=Rattus norvegicus OX=10116 GN=Rnf14 PE=1 SV=1	3.97018e+08	4.54229e+08	4.25923e+08	4.49276e+08	5.10388e+08	4.09921e+08	4.71277e+08	435372720	3.87045e+08	5.10249e+08	5.3315e+08	4.88877e+08	4.38297e+08	4.30866e+08	4.51389e+08
D4A0T0	NADH:ubiquinone oxidoreductase subunit B10 OS=Rattus norvegicus OX=10116 GN=Ndufb10 PE=1 SV=1	6.48961e+08	6.75475e+08	7.21364e+08	6.43244e+08	6.25439e+08	6.09585e+08	6.60253e+08	6.58237e+08	6.56531e+08	6.60571e+08	6.62716e+08	6.29001e+08	6.88747e+08	6.26894e+08	6.87897e+08
A0A0G2KB98	Glycogen synthase kinase-3 beta OS=Rattus norvegicus OX=10116 GN=Gsk3b PE=1 SV=1
A0A0G2JT06	COP9 signalosome complex subunit 1 OS=Rattus norvegicus OX=10116 GN=Gps1 PE=1 SV=1	4.23595e+08	4.394e+08	4.42051e+08	4.51395e+08	4.0477e+08	4.13915e+08	4.26984e+08	392391237	3.90073e+08	4.57548e+08	4.10698e+08	4.48345e+08	4.33163e+08	4.30867e+08	4.71151e+08
F1LQW8	Ras/Rap GTPase-activating protein SynGAP OS=Rattus norvegicus OX=10116 GN=Syngap1 PE=1 SV=2	1.80361e+08	1.80836e+08	1.95204e+08	1.80338e+08	1.25414e+08	1.6616e+08	1.66665e+08	178381752	4.27376e+08	1.83186e+08	1.7685e+08	1.36515e+08	1.17558e+08	1.92547e+08	1.91526e+08
Q63377	Sodium/potassium-transporting ATPase subunit beta-3 OS=Rattus norvegicus OX=10116 GN=Atp1b3 PE=2 SV=1	4.82584e+08	4.83047e+08	4.92933e+08	5.20594e+08	4.06048e+08	4.05175e+08	4.65849e+08	513916751	4.6014e+08	4.29054e+08	4.26157e+08	4.4143e+08	4.77122e+08	4.60913e+08	4.49032e+08
P09330	Ribose-phosphate pyrophosphokinase 2 OS=Rattus norvegicus OX=10116 GN=Prps2 PE=1 SV=3	1.51592e+07	1.48287e+07	1.80874e+07	1.47964e+07	1.34896e+07	1.11101e+07	1.35933e+07	13501328	1.26643e+07	1.7277e+07	1.06786e+07	1.48966e+07	1.44816e+07	1.15676e+07	1.53271e+07
B0BNN3	Carbonic anhydrase 1 OS=Rattus norvegicus OX=10116 GN=Ca1 PE=1 SV=1	2.17326e+08	1.03709e+08	1.16217e+08	1.61785e+08	2.30132e+08	2.64792e+08	2.03553e+08	249999501	1.47237e+08	1.67524e+08	2.10937e+08	1.08831e+08	1.51433e+08	2.30005e+08	1.36804e+08
P12007	Isovaleryl-CoA dehydrogenase, mitochondrial OS=Rattus norvegicus OX=10116 GN=Ivd PE=1 SV=2	5.3371e+08	5.80449e+08	5.88226e+08	5.87821e+08	5.56207e+08	5.0434e+08	5.84846e+08	6.0558e+08	5.31659e+08	6.46416e+08	6.26926e+08	5.31998e+08	5.60383e+08	5.55991e+08	4.96935e+08
A0A0G2JSQ0	Serine/threonine-protein phosphatase 2A 55 kDa regulatory subunit B OS=Rattus norvegicus OX=10116 GN=Ppp2r2d PE=1 SV=1	3.42897e+07	3.06899e+07	3.69411e+07	4.39838e+07	4.9014e+07	5.01783e+07	2.60881e+07	2.73875e+07	3.15688e+07	4.02272e+07	4.32476e+07	4.20954e+07	4.05737e+07	4.2161e+07	3.89198e+07
P04631	Protein S100-B OS=Rattus norvegicus OX=10116 GN=S100b PE=1 SV=2	2.89805e+09	3.28723e+09	2.49476e+09	2.24253e+09	2.85011e+09	2.65085e+09	2.98029e+09	2.4863e+09	2.78023e+09	3.79981e+09	3.49887e+09	3.25243e+09	2.75896e+09	2.70988e+09	2.6743e+09
A0A0G2K4U6	Interleukin enhancer-binding factor 3 OS=Rattus norvegicus OX=10116 GN=Ilf3 PE=1 SV=1	1.26651e+08	1.10938e+08	1.2629e+08	1.06467e+08	9.44165e+07	9.67094e+07	9.45752e+07	80776342	1.28547e+08	1.13582e+08	9.72374e+07	9.77023e+07	9.43903e+07	9.75855e+07	1.16323e+08
P57113	Maleylacetoacetate isomerase OS=Rattus norvegicus OX=10116 GN=Gstz1 PE=1 SV=2	1.11822e+08	8.90474e+07	8.76241e+07	1.19149e+08	1.2746e+08	1.43893e+08	8.93485e+07	92003825	1.0124e+08	1.51541e+08	1.43463e+08	1.5176e+08	8.32783e+07	9.83726e+07	9.19521e+07
Q6P7B0	Tryptophan--tRNA ligase, cytoplasmic OS=Rattus norvegicus OX=10116 GN=Wars PE=1 SV=2	3.97493e+08	3.10394e+08	3.13195e+08	3.22872e+08	3.1123e+08	3.18786e+08	3.18699e+08	3.1908e+08	2.99049e+08	3.05069e+08	3.02069e+08	3.09465e+08	2.70048e+08	3.17063e+08	2.98791e+08
D3ZC07	Protein SET OS=Rattus norvegicus OX=10116 GN=Pkn3 PE=1 SV=3	1.90196e+08	2.08525e+08	2.25562e+08	2.10641e+08	2.0156e+08	1.83238e+08	2.16963e+08	199857691	1.85214e+08	2.44127e+08	2.22795e+08	1.84062e+08	2.09559e+08	1.84765e+08	2.21792e+08
P53042	Serine/threonine-protein phosphatase 5 OS=Rattus norvegicus OX=10116 GN=Ppp5c PE=1 SV=1	2.98669e+08	3.43175e+08	3.17062e+08	3.81436e+08	3.66511e+08	3.39368e+08	2.9089e+08	2.90088e+08	3.01134e+08	4.37187e+08	4.09786e+08	4.01829e+08	3.39303e+08	3.17512e+08	3.08493e+08
Q3B7V5	RAB2B, member RAS oncogene family OS=Rattus norvegicus OX=10116 GN=Rab2b PE=1 SV=1	2.96636e+07	2.87465e+07	2.91994e+07	2.60739e+07	2.37575e+07	2.14226e+07	2.8871e+07	25650546	2.56498e+07	2.78799e+07	2.78415e+07	3.0316e+07	2.91344e+07	2.58572e+07	2.78029e+07
B0BN85	Protein SGT1 homolog OS=Rattus norvegicus OX=10116 GN=Sugt1 PE=2 SV=1	1.56757e+08	1.46277e+08	1.4778e+08	1.48487e+08	1.22102e+08	1.35727e+08	1.57497e+08	152041643	1.32583e+08	1.97249e+08	1.3816e+08	1.36046e+08	1.52641e+08	1.50574e+08	1.67656e+08
P63029	Translationally-controlled tumor protein OS=Rattus norvegicus OX=10116 GN=Tpt1 PE=1 SV=1	4.76942e+08	5.0199e+08	4.89146e+08	4.49599e+08	5.03245e+08	4.92601e+08	4.89332e+08	467310261	4.52408e+08	4.85593e+08	5.0015e+08	4.57292e+08	4.63205e+08	4.63539e+08	4.46266e+08
P01041	Cystatin-B OS=Rattus norvegicus OX=10116 GN=Cstb PE=1 SV=1	5.3049e+08	5.72068e+08	5.35408e+08	5.3451e+08	5.68054e+08	5.82847e+08	4.92749e+08	623366431	5.29199e+08	3.58391e+08	4.04256e+08	4.04092e+08	5.18672e+08	5.60557e+08	5.35907e+08
P20171	GTPase HRas OS=Rattus norvegicus OX=10116 GN=Hras PE=1 SV=2	1.37142e+08	1.34922e+08	1.46461e+08	1.50017e+08	1.32989e+08	1.18454e+08	1.26917e+08	124316550	1.37445e+08	1.22419e+08	9.24183e+07	1.38871e+08	1.47025e+08	1.11991e+08	1.34778e+08
Q66HF3	Electron transfer flavoprotein-ubiquinone oxidoreductase, mitochondrial OS=Rattus norvegicus OX=10116 GN=Etfdh PE=1 SV=1	2.18733e+08	2.35093e+08	2.67427e+08	2.33802e+08	2.36098e+08	2.56464e+08	2.33137e+08	2.46877e+08	2.19084e+08	1.99012e+08	1.96793e+08	2.05131e+08	2.30231e+08	2.45681e+08	2.27808e+08
D4A8H3	Similar to RIKEN cDNA 5730469D23 (Predicted) OS=Rattus norvegicus OX=10116 GN=Uba6 PE=1 SV=1	2.09335e+08	2.37486e+08	2.23346e+08	2.92043e+08	3.96187e+08	2.63924e+08	3.95494e+08	2.31072e+08	3.20932e+08	3.62187e+08	2.63204e+08	3.2504e+08	2.2852e+08	2.69147e+08	3.39668e+08
D4A3E1	Heterogeneous nuclear ribonucleoprotein L-like OS=Rattus norvegicus OX=10116 GN=Hnrnpll PE=1 SV=1	9.1594e+07	1.12563e+08	1.209e+08	1.00796e+08	1.0419e+08	9.48374e+07	9.81005e+07	92399963	1.03019e+08	8.22771e+07	1.03017e+08	9.7155e+07	9.28752e+07	1.1515e+08	1.00606e+08
Q5VLR5	BWK4 OS=Rattus norvegicus OX=10116 GN=Erp44 PE=1 SV=1	1.49331e+08	1.31349e+08	1.30331e+08	1.22652e+08	1.40083e+08	1.37818e+08	1.4436e+08	1.33561e+08	1.07444e+08	1.68929e+08	1.3127e+08	1.32604e+08	1.56685e+08	1.59981e+08	1.52823e+08
P62828	GTP-binding nuclear protein Ran OS=Rattus norvegicus OX=10116 GN=Ran PE=1 SV=3	1.34055e+09	1.33399e+09	1.42069e+09	1.33402e+09	1.37319e+09	1.29801e+09	1.26292e+09	1348765918	1.26054e+09	1.48443e+09	1.35659e+09	1.37722e+09	1.29629e+09	1.3534e+09	1.33465e+09
D4A4T0	STIP1 homology and U-Box containing protein 1, isoform CRA_b OS=Rattus norvegicus OX=10116 GN=Stub1 PE=1 SV=1	1.59291e+08	1.69962e+08	1.73165e+08	1.58987e+08	1.47479e+08	1.33581e+08	1.70071e+08	1.39871e+08	1.31435e+08	1.79051e+08	1.75965e+08	2.00467e+08	1.67029e+08	1.48486e+08	2.06851e+08
P04256	Heterogeneous nuclear ribonucleoprotein A1 OS=Rattus norvegicus OX=10116 GN=Hnrnpa1 PE=1 SV=3	3.86131e+08	3.91733e+08	3.48331e+08	3.32022e+08	3.59247e+08	3.39703e+08	3.93688e+08	3.43759e+08	3.63209e+08	4.38853e+08	4.04678e+08	3.52675e+08	3.78905e+08	3.43749e+08	3.6562e+08
A0A0G2JUG7	IQ motif and Sec7 domain 1 OS=Rattus norvegicus OX=10116 GN=Iqsec1 PE=1 SV=1	1.27602e+08	1.04224e+08	1.02456e+08	1.26978e+08	1.33726e+08	1.00677e+08	1.16092e+08	1.06037e+08	1.36906e+08	1.13731e+08	1.21028e+08	1.25406e+08	1.25383e+08	1.43122e+08	1.03709e+08
D4ABI7	Very-long-chain (3R)-3-hydroxyacyl-CoA dehydratase OS=Rattus norvegicus OX=10116 GN=Hacd3 PE=1 SV=2	4.84241e+08	5.0853e+08	5.04195e+08	4.76905e+08	4.8284e+08	4.01165e+08	5.06163e+08	472734388	4.24793e+08	5.68235e+08	4.82842e+08	5.12478e+08	5.20114e+08	4.84021e+08	5.10253e+08
A1L108	Actin-related protein 2/3 complex subunit 5-like protein OS=Rattus norvegicus OX=10116 GN=Arpc5l PE=1 SV=2	1.37838e+08	1.55522e+08	1.11542e+08	1.35688e+08	1.34396e+08	1.31884e+08	1.32217e+08	132017772	1.47891e+08	1.56845e+08	1.3016e+08	1.07381e+08	1.50308e+08	1.42248e+08	1.30767e+08
B0BN30	Mitochondrial carrier 1 OS=Rattus norvegicus OX=10116 GN=Mtch1 PE=1 SV=1	5.10075e+08	5.17414e+08	5.25475e+08	4.98828e+08	4.9691e+08	4.33721e+08	5.56669e+08	5.03616e+08	4.94495e+08	5.29736e+08	5.01819e+08	4.83502e+08	5.0326e+08	4.48531e+08	5.30808e+08
Q5M963	Cytidine monophosphate N-acetylneuraminic acid synthetase OS=Rattus norvegicus OX=10116 GN=Cmas PE=1 SV=1	2.20568e+08	2.30047e+08	2.26382e+08	1.98934e+08	2.1961e+08	1.79523e+08	2.57361e+08	2.06439e+08	2.28329e+08	2.317e+08	2.31533e+08	1.93341e+08	2.30249e+08	2.02887e+08	2.24494e+08
D3ZPP2	ADP-ribosylation factor-like GTPase 8A OS=Rattus norvegicus OX=10116 GN=Arl8a PE=1 SV=1	1.07376e+08	1.11327e+08	1.09733e+08	1.01497e+08	1.17627e+08	9.49105e+07	1.06312e+08	1.00029e+08	9.32142e+07	1.20025e+08	9.71288e+07	9.27828e+07	1.1085e+08	1.1144e+08	1.17608e+08
A0A0G2K0T6	Gamma-synuclein OS=Rattus norvegicus OX=10116 GN=Sncg PE=1 SV=1	2.71284e+08	2.07699e+08	2.18809e+08	4.10685e+08	2.55444e+08	3.24741e+08	3.06515e+08	348893702	2.3709e+08	4.654e+07	3.81136e+07	2.68172e+08	1.81691e+08	4.10484e+08	2.82891e+08
Q6PCT9	Proteasome (Prosome, macropain) 26S subunit, non-ATPase, 6 OS=Rattus norvegicus OX=10116 GN=Psmd6 PE=1 SV=1	3.24862e+08	2.6539e+08	3.2995e+08	2.76865e+08	2.70417e+08	2.91719e+08	2.69783e+08	317220802	2.32222e+08	3.57313e+08	2.38863e+08	3.02114e+08	3.13713e+08	3.18683e+08	3.45912e+08
B2RYS8	NADH dehydrogenase [ubiquinone] 1 beta subcomplex subunit 8, mitochondrial OS=Rattus norvegicus OX=10116 GN=Ndufb8 PE=1 SV=1	4.36443e+08	4.52675e+08	4.98662e+08	5.86889e+08	4.32408e+08	4.23647e+08	3.9366e+08	432889520	4.77931e+08	6.20435e+08	4.56117e+08	6.36541e+08	4.68172e+08	4.60412e+08	4.61791e+08
Q56R17	Importin subunit alpha OS=Rattus norvegicus OX=10116 GN=Kpna4 PE=1 SV=1	5.57988e+07	5.9731e+07	6.56736e+07	5.4241e+07	5.16865e+07	4.71548e+07	4.99705e+07	40162802	6.24178e+07	6.34309e+07	5.33103e+07	4.98373e+07	5.28873e+07	5.95539e+07	5.54009e+07
Q66HA6	ADP-ribosylation factor-like protein 8B OS=Rattus norvegicus OX=10116 GN=Arl8b PE=2 SV=1	1.34228e+08	1.20567e+08	1.56012e+08	1.47989e+08	1.42617e+08	1.50183e+08	1.07913e+08	1.65526e+08	1.45287e+08	1.65183e+08	1.17816e+08	1.11155e+08	1.48213e+08	1.36985e+08	1.29276e+08
A0A0G2JYF0	Anion exchange protein OS=Rattus norvegicus OX=10116 GN=Slc4a10 PE=1 SV=1	6.25021e+07	5.50799e+07	6.18249e+07	5.19014e+07	5.54512e+07	5.47239e+07	5.98881e+07	51822092	8.5958e+07	6.96769e+07	6.81025e+07	5.98097e+07	5.9068e+07	5.67945e+07	6.59195e+07
P97852	Peroxisomal multifunctional enzyme type 2 OS=Rattus norvegicus OX=10116 GN=Hsd17b4 PE=1 SV=3	4.15002e+08	4.30526e+08	4.39332e+08	4.2725e+08	4.22622e+08	3.26262e+08	4.32136e+08	3.93089e+08	3.74277e+08	3.56193e+08	3.20757e+08	4.64063e+08	4.15144e+08	4.19215e+08	4.55263e+08
A0A0G2K0P8	CDW92 antigen, isoform CRA_b OS=Rattus norvegicus OX=10116 GN=Slc44a1 PE=1 SV=1	1.96344e+08	2.115e+08	1.96358e+08	2.20781e+08	2.20165e+08	2.09572e+08	1.97371e+08	2.06296e+08	1.84086e+08	1.44012e+08	1.86978e+08	2.15118e+08	2.24049e+08	2.06426e+08	2.02278e+08
A0A0A0MY13	Probable G-protein-coupled receptor 158 OS=Rattus norvegicus OX=10116 GN=Gpr158 PE=1 SV=1	9.45751e+07	1.09325e+08	9.19959e+07	1.01327e+08	8.76514e+07	1.02746e+08	8.27508e+07	1.08176e+08	1.39935e+08	1.00202e+08	1.06132e+08	7.08207e+07	9.07644e+07	8.93502e+07	1.07114e+08
G3V6H2	Pre-mRNA processing factor 8, isoform CRA_a OS=Rattus norvegicus OX=10116 GN=Prpf8 PE=1 SV=1	9.91223e+07	1.11585e+08	1.05249e+08	1.03589e+08	1.08813e+08	9.52878e+07	9.74338e+07	1.08943e+08	8.29588e+07	1.19437e+08	1.01991e+08	1.02574e+08	9.67659e+07	1.03757e+08	1.05426e+08
P63047	Sulfotransferase 4A1 OS=Rattus norvegicus OX=10116 GN=Sult4a1 PE=1 SV=1	2.24803e+08	2.46251e+08	2.32219e+08	2.11518e+08	2.27508e+08	2.11536e+08	1.92817e+08	1.8351e+08	2.20771e+08	2.28236e+08	2.23202e+08	2.25131e+08	2.38509e+08	2.1943e+08	2.23485e+08
D3ZAI6	5'-nucleotidase domain-containing 3 OS=Rattus norvegicus OX=10116 GN=Nt5dc3 PE=1 SV=2	1.92251e+08	2.06316e+08	2.0242e+08	1.82874e+08	1.71926e+08	1.60056e+08	1.92923e+08	1.68822e+08	2.2109e+08	1.90284e+08	1.84849e+08	1.75022e+08	2.1275e+08	1.72275e+08	1.96879e+08
P01186	Vasopressin-neurophysin 2-copeptin OS=Rattus norvegicus OX=10116 GN=Avp PE=1 SV=1	1.09625e+09	8.593e+08	9.2787e+08	1.02868e+09	8.61793e+08	1.04258e+09	7.75392e+08	917289830	8.1166e+08	1.20199e+09	6.2779e+08	6.4483e+08	8.50657e+08	1.00783e+09	7.27148e+08
D3ZZN3	Acetyl-coenzyme A synthetase OS=Rattus norvegicus OX=10116 GN=Acss1 PE=3 SV=1	1.821e+08	1.76027e+08	1.80991e+08	1.50852e+08	1.56995e+08	1.45437e+08	1.6785e+08	1.55216e+08	1.51824e+08	1.99782e+08	2.05917e+08	2.03448e+08	1.7284e+08	1.62103e+08	2.06721e+08
P0DP31	Calmodulin-3 OS=Rattus norvegicus OX=10116 GN=Calm3 PE=1 SV=1	4.82064e+09	4.91515e+09	4.56212e+09	4.38115e+09	5.01213e+09	4.7894e+09	5.1489e+09	4.51381e+09	5.48962e+09	4.93161e+09	5.09022e+09	4.80896e+09	5.044e+09	4.96111e+09	4.59453e+09
D3ZZB0	Disco-interacting protein 2 homolog C OS=Rattus norvegicus OX=10116 GN=Dip2c PE=1 SV=2	4.76933e+07	5.62451e+07	5.48293e+07	4.91346e+07	4.87321e+07	4.6131e+07	5.08981e+07	3.49387e+07	5.12025e+07	3.78898e+07	5.14635e+07	4.18728e+07	5.29469e+07	5.06488e+07	2.76486e+07
Q6IRJ7	Annexin OS=Rattus norvegicus OX=10116 GN=Anxa7 PE=1 SV=1	3.1986e+08	3.18356e+08	3.33506e+08	3.15781e+08	3.10755e+08	3.06838e+08	3.18267e+08	318566995	2.91467e+08	3.33856e+08	2.89461e+08	2.48401e+08	2.74941e+08	3.3335e+08	3.23928e+08
P43138	DNA-(apurinic or apyrimidinic site) lyase OS=Rattus norvegicus OX=10116 GN=Apex1 PE=1 SV=2	7.91205e+07	9.20759e+07	6.98311e+07	7.36711e+07	6.02699e+07	6.28539e+07	9.27873e+07	90260938	9.62639e+07	6.42652e+07	5.90294e+07	5.47385e+07	8.10932e+07	8.19587e+07	8.814e+07
Q5PQN0	Neurocalcin-delta OS=Rattus norvegicus OX=10116 GN=Ncald PE=1 SV=3	1.81112e+08	1.9428e+08	2.1193e+08	1.93571e+08	2.26692e+08	2.03335e+08	2.15294e+08	1.94928e+08	2.37484e+08	2.08589e+08	2.4117e+08	2.62493e+08	2.29356e+08	2.05616e+08	2.11968e+08
P08592	Amyloid-beta A4 protein OS=Rattus norvegicus OX=10116 GN=App PE=1 SV=2	1.69163e+08	1.55213e+08	1.80934e+08	1.77602e+08	1.72745e+08	1.74647e+08	1.59262e+08	1.55263e+08	1.84022e+08	1.87581e+08	1.86382e+08	1.60594e+08	1.6159e+08	1.60003e+08	1.68364e+08
Q6MG49	Large proline-rich protein BAG6 OS=Rattus norvegicus OX=10116 GN=Bag6 PE=1 SV=2	1.10175e+08	8.84277e+07	1.05205e+08	1.1605e+08	9.94946e+07	7.39218e+07	8.38615e+07	1.04085e+08	1.04824e+08	1.00438e+08	8.07514e+07	8.56475e+07	9.57634e+07	1.01281e+08	9.48269e+07
P62966	Cellular retinoic acid-binding protein 1 OS=Rattus norvegicus OX=10116 GN=Crabp1 PE=1 SV=3	2.25169e+08	2.57989e+08	2.8975e+08	2.30134e+08	1.8264e+08	2.09599e+08	2.39081e+08	2.11575e+08	1.62436e+08	1.30647e+08	1.18706e+08	1.32881e+08	1.74856e+08	2.35799e+08	2.35519e+08
Q5PPH0	Enolase-phosphatase E1 OS=Rattus norvegicus OX=10116 GN=Enoph1 PE=2 SV=1	1.27563e+08	1.26845e+08	1.1098e+08	1.18576e+08	1.2825e+08	1.16894e+08	1.27746e+08	1.17885e+08	1.40252e+08	1.34586e+08	1.36562e+08	1.38324e+08	1.29501e+08	1.13279e+08	1.20948e+08
Q99JE4	Ras-specific guanine nucleotide-releasing factor 2 OS=Rattus norvegicus OX=10116 GN=Rasgrf2 PE=1 SV=1	5.02032e+07	4.81257e+07	3.81273e+07	4.13985e+07	3.62645e+07	3.45488e+07	4.29834e+07	4.27884e+07	3.19983e+07	4.64267e+07	3.2771e+07	4.01442e+07	3.88257e+07	5.28492e+07	5.2347e+07
Q6DUV1	Protein kinase C epsilon type OS=Rattus norvegicus OX=10116 PE=2 SV=1	1.18668e+08	1.13745e+08	1.21372e+08	1.08161e+08	1.07366e+08	9.97569e+07	1.14379e+08	1.08457e+08	1.63537e+08	1.07772e+08	1.13025e+08	1.15642e+08	1.20879e+08	1.05177e+08	1.1602e+08
B0BN65	Family with sequence similarity 49, member A OS=Rattus norvegicus OX=10116 GN=Fam49a PE=1 SV=1	9.03623e+07	8.74477e+07	8.95753e+07	8.6449e+07	8.86586e+07	8.72097e+07	9.08659e+07	8.55725e+07	1.2586e+08	1.03246e+08	8.92354e+07	9.5242e+07	8.7827e+07	9.97877e+07	9.59386e+07
Q6P7R8	Very-long-chain 3-oxoacyl-CoA reductase OS=Rattus norvegicus OX=10116 GN=Hsd17b12 PE=2 SV=1	2.83657e+08	3.07107e+08	3.06851e+08	3.49004e+08	3.16189e+08	3.03109e+08	2.83149e+08	2.79628e+08	2.4043e+08	4.09664e+08	3.6801e+08	3.87155e+08	2.92562e+08	2.94244e+08	2.55754e+08
Q5RJN0	NADH dehydrogenase (Ubiquinone) Fe-S protein 7 OS=Rattus norvegicus OX=10116 GN=Ndufs7 PE=1 SV=1	5.30167e+08	5.44373e+08	5.35661e+08	5.22757e+08	5.39972e+08	6.24561e+08	4.75245e+08	4.75543e+08	5.4222e+08	5.39426e+08	5.89305e+08	5.83958e+08	5.17221e+08	4.84542e+08	4.63736e+08
A0A0G2K2D6	Tubulin polymerization-promoting protein OS=Rattus norvegicus OX=10116 GN=Tppp PE=1 SV=1	5.05823e+08	5.10022e+08	4.62005e+08	4.40147e+08	5.90757e+08	7.44345e+08	5.95711e+08	4.31969e+08	7.03292e+08	6.18107e+08	6.67869e+08	5.86439e+08	5.31704e+08	5.12655e+08	4.75475e+08
Q765A7	GPI inositol-deacylase OS=Rattus norvegicus OX=10116 GN=Pgap1 PE=1 SV=1	1.69206e+08	1.61879e+08	1.61395e+08	1.44705e+08	1.54738e+08	1.45044e+08	1.56189e+08	1.51793e+08	1.29875e+08	1.85912e+08	1.73748e+08	1.63417e+08	1.67568e+08	1.52932e+08	1.79177e+08
P62775	Myotrophin OS=Rattus norvegicus OX=10116 GN=Mtpn PE=1 SV=2	4.95197e+08	5.58258e+08	5.50878e+08	5.29846e+08	5.34263e+08	4.96193e+08	5.23342e+08	4.78646e+08	5.19073e+08	5.86323e+08	5.34893e+08	5.3607e+08	5.43886e+08	5.47661e+08	5.55909e+08
F1M787	Catenin delta-2 OS=Rattus norvegicus OX=10116 GN=Ctnnd2 PE=1 SV=3	6.76252e+07	7.35593e+07	7.58571e+07	8.30985e+07	6.44299e+07	7.08964e+07	6.25188e+07	7.76794e+07	1.45605e+08	6.37837e+07	5.06242e+07	4.06943e+07	6.09289e+07	4.82851e+07	3.26769e+07
F1M8A4	PTPRF-interacting protein alpha 2 OS=Rattus norvegicus OX=10116 GN=Ppfia2 PE=1 SV=2	5.37081e+07	5.71982e+07	6.50731e+07	6.54388e+07	5.08595e+07	5.96682e+07	4.49754e+07	5.23375e+07	6.72838e+07	5.93621e+07	5.88195e+07	6.68082e+07	5.42711e+07	5.29224e+07	5.41661e+07
Q6P792	Four and a half LIM domains 1 OS=Rattus norvegicus OX=10116 GN=Fhl1 PE=1 SV=1	3.12091e+08	3.07996e+08	3.23077e+08	3.28074e+08	3.10969e+08	3.03039e+08	3.00682e+08	3.66641e+08	2.7433e+08	2.78598e+08	2.50576e+08	2.62474e+08	2.65646e+08	3.07868e+08	3.33056e+08
F1LQD2	Calcium/calmodulin-dependent protein kinase kinase 1 OS=Rattus norvegicus OX=10116 GN=Camkk1 PE=1 SV=2	2.88145e+08	2.51773e+08	2.82905e+08	3.30374e+08	2.63454e+08	2.30633e+08	2.48226e+08	2.59425e+08	2.69566e+08	2.88579e+08	2.95623e+08	1.14553e+08	2.47825e+08	2.6099e+08	2.51987e+08
F1LXA0	NADH dehydrogenase [ubiquinone] 1 alpha subcomplex subunit 12 OS=Rattus norvegicus OX=10116 GN=Ndufa12 PE=1 SV=2	4.12259e+08	4.03276e+08	3.66656e+08	3.5833e+08	3.62746e+08	4.07148e+08	2.90775e+08	384216978	4.09762e+08	3.74987e+08	3.49254e+08	3.5334e+08	3.85318e+08	3.51911e+08	3.55862e+08
Q7TP52	Carboxymethylenebutenolidase homolog OS=Rattus norvegicus OX=10116 GN=Cmbl PE=2 SV=1	2.46105e+08	2.53396e+08	2.41185e+08	2.55288e+08	2.55116e+08	2.66277e+08	2.55829e+08	2.73006e+08	1.80377e+08	2.55958e+08	2.31931e+08	2.32573e+08	2.10668e+08	1.72017e+08	2.0216e+08
D4A0A1	SOGA family member 3 OS=Rattus norvegicus OX=10116 GN=Soga3 PE=1 SV=1	2.66083e+08	2.83913e+08	2.84095e+08	2.4539e+08	2.29734e+08	2.26901e+08	2.70233e+08	2.77913e+08	2.59188e+08	2.64231e+08	2.25541e+08	2.60061e+08	2.60633e+08	2.42555e+08	2.9542e+08
F1LRE1	Glutathione reductase OS=Rattus norvegicus OX=10116 GN=Gsr PE=1 SV=2	1.63805e+08	1.62857e+08	1.70623e+08	1.56787e+08	1.78616e+08	1.21007e+08	1.58854e+08	1.33957e+08	1.65072e+08	1.63752e+08	1.51098e+08	1.43614e+08	1.71361e+08	1.57517e+08	1.62429e+08
Q6AY21	G3BP stress granule assembly factor 2 OS=Rattus norvegicus OX=10116 GN=G3bp2 PE=1 SV=1	1.52762e+08	1.39506e+08	1.62565e+08	1.51385e+08	1.55628e+08	1.4013e+08	1.51709e+08	151418320	1.61479e+08	1.55988e+08	1.44772e+08	1.50953e+08	1.50663e+08	1.53309e+08	1.53837e+08
Q3S4A4	ADP-ribosylation factor GTPase activating protein 1 heart isoform OS=Rattus norvegicus OX=10116 GN=Arfgap1 PE=1 SV=1	1.75544e+08	1.67392e+08	1.56185e+08	1.38386e+08	1.56307e+08	1.4362e+08	1.48873e+08	1.29918e+08	1.75318e+08	1.88537e+08	1.77143e+08	1.62146e+08	1.7888e+08	1.55774e+08	1.76706e+08
Q8VIL3	ZW10 interactor OS=Rattus norvegicus OX=10116 GN=Zwint PE=1 SV=1	5.87718e+08	5.62421e+08	5.55115e+08	5.07278e+08	5.01823e+08	5.18305e+08	5.13613e+08	504237010	3.99773e+08	5.67755e+08	4.92435e+08	4.42756e+08	5.32563e+08	5.30676e+08	5.73382e+08
P10111	Peptidyl-prolyl cis-trans isomerase A OS=Rattus norvegicus OX=10116 GN=Ppia PE=1 SV=2	9.50659e+09	9.75301e+09	9.90891e+09	9.54524e+09	9.54312e+09	8.96112e+09	9.72221e+09	9565076556	1.02648e+10	9.47792e+09	9.19818e+09	9.8186e+09	9.34621e+09	9.27465e+09	9.59122e+09
Q6P6T4	Echinoderm microtubule-associated protein-like 2 OS=Rattus norvegicus OX=10116 GN=Eml2 PE=1 SV=1	1.55512e+08	1.5999e+08	1.58005e+08	1.6477e+08	1.65546e+08	1.56815e+08	1.34002e+08	176647546	1.43676e+08	1.45111e+08	1.45805e+08	1.71381e+08	1.58944e+08	1.3688e+08	1.1519e+08
G3V836	Clusterin OS=Rattus norvegicus OX=10116 GN=Clu PE=1 SV=1	1.49531e+08	1.36889e+08	1.48156e+08	1.42815e+08	1.36585e+08	1.5843e+08	1.28414e+08	1.43704e+08	1.19701e+08	1.73949e+08	1.37227e+08	1.47676e+08	1.42244e+08	1.46635e+08	1.45034e+08
B2RZ78	Vacuolar protein sorting-associated protein 29 OS=Rattus norvegicus OX=10116 GN=Vps29 PE=1 SV=2	5.95402e+07	6.14994e+07	4.01678e+07	4.20143e+07	5.18827e+07	4.36633e+07	6.74269e+07	48371180	6.51036e+07	7.72663e+07	5.54068e+07	5.101e+07	5.43063e+07	4.86323e+07	4.58396e+07
Q91Z79	Liprin-alpha-3 OS=Rattus norvegicus OX=10116 GN=Ppfia3 PE=1 SV=2	1.63173e+08	1.61486e+08	1.68139e+08	1.45224e+08	1.63355e+08	1.63978e+08	1.51227e+08	127538132	2.06596e+08	1.43603e+08	1.43395e+08	1.52001e+08	1.58499e+08	1.55057e+08	1.39001e+08
D3Z9L0	Acylglycerol kinase OS=Rattus norvegicus OX=10116 GN=Agk PE=1 SV=2	1.61297e+08	1.71218e+08	1.67183e+08	1.58068e+08	1.55593e+08	1.42807e+08	1.43836e+08	1.55039e+08	2.02854e+08	1.55824e+08	1.58284e+08	1.49416e+08	1.69309e+08	1.51854e+08	1.62003e+08
B2RYN1	Fructosamine-3-kinase-related protein OS=Rattus norvegicus OX=10116 GN=Fn3krp PE=1 SV=1	3.66524e+08	3.75498e+08	2.99239e+08	2.94169e+08	3.4479e+08	3.10777e+08	3.41849e+08	3.34073e+08	3.0419e+08	3.73097e+08	3.2691e+08	3.49778e+08	3.08298e+08	3.63108e+08	3.70844e+08
A2VCX1	TIP41-like protein OS=Rattus norvegicus OX=10116 GN=Tiprl PE=1 SV=1	2.18513e+08	2.2188e+08	2.18054e+08	2.11155e+08	1.87122e+08	1.85031e+08	2.31022e+08	1.96463e+08	2.13444e+08	2.71264e+08	2.4404e+08	2.26071e+08	2.19154e+08	2.04613e+08	2.11667e+08
P21531	60S ribosomal protein L3 OS=Rattus norvegicus OX=10116 GN=Rpl3 PE=1 SV=3	6.24662e+08	6.40961e+08	6.4539e+08	6.26409e+08	6.12577e+08	6.22335e+08	6.46227e+08	6.37297e+08	5.92218e+08	6.45778e+08	6.22619e+08	5.8649e+08	6.45754e+08	6.10704e+08	6.25087e+08
Q4FZY0	EF-hand domain-containing protein D2 OS=Rattus norvegicus OX=10116 GN=Efhd2 PE=1 SV=1	4.92191e+08	5.07515e+08	5.3981e+08	5.13276e+08	5.07747e+08	3.98987e+08	4.93346e+08	487346817	4.69694e+08	5.18465e+08	4.75992e+08	4.59377e+08	5.40602e+08	5.19239e+08	5.45194e+08
P36201	Cysteine-rich protein 2 OS=Rattus norvegicus OX=10116 GN=Crip2 PE=2 SV=1	4.10969e+08	4.27223e+08	3.79969e+08	3.7017e+08	3.75904e+08	4.57662e+08	3.44902e+08	393534594	3.99216e+08	3.94428e+08	3.74453e+08	3.48932e+08	3.75944e+08	4.20954e+08	3.99549e+08
A0A0G2JZH8	Dihydrolipoamide acetyltransferase component of pyruvate dehydrogenase complex OS=Rattus norvegicus OX=10116 GN=Pdhx PE=1 SV=1	4.12256e+08	4.53047e+08	4.24541e+08	3.20958e+08	4.02845e+08	3.49558e+08	4.20212e+08	3.89144e+08	5.28284e+08	4.92267e+08	4.96398e+08	4.25625e+08	3.22931e+08	3.84086e+08	4.24983e+08
Q63798	Proteasome activator complex subunit 2 OS=Rattus norvegicus OX=10116 GN=Psme2 PE=2 SV=3	1.94488e+08	2.27488e+08	2.06711e+08	2.04652e+08	1.83459e+08	1.8313e+08	1.8335e+08	1.84824e+08	1.41092e+08	2.2123e+08	1.72451e+08	1.67825e+08	1.67115e+08	1.9909e+08	1.82831e+08
A0A0G2K9V6	Threonine--tRNA ligase, cytoplasmic OS=Rattus norvegicus OX=10116 GN=Tars PE=1 SV=1	1.65132e+08	2.22737e+08	1.73481e+08	1.69031e+08	1.88204e+08	1.93169e+08	1.80204e+08	153582314	1.59109e+08	2.13724e+08	1.7416e+08	1.82189e+08	1.97964e+08	1.91099e+08	1.84931e+08
B5DF55	RCG55706 OS=Rattus norvegicus OX=10116 GN=Stam PE=1 SV=1	1.43871e+08	1.5898e+08	1.29566e+08	1.36919e+08	1.6442e+08	1.45252e+08	1.41456e+08	128539250	1.50203e+08	1.89666e+08	1.62619e+08	1.32645e+08	1.48554e+08	1.38183e+08	1.55336e+08
G4XKZ2	Ubiquitin specific peptidase 9 Y-linked OS=Rattus norvegicus OX=10116 GN=Usp9y PE=2 SV=2	4.00668e+07	3.62472e+07	3.51424e+07	4.06291e+07	4.08388e+07	4.20679e+07	3.68883e+07	36747640	3.34225e+07	3.25008e+07	3.03385e+07	1.20514e+07	3.21694e+07	3.13928e+07	3.79178e+07
G3V8D6	Tripartite motif protein 3, isoform CRA_a OS=Rattus norvegicus OX=10116 GN=Trim3 PE=1 SV=1	1.20615e+08	1.18248e+08	1.11025e+08	1.22645e+08	1.02142e+08	1.03212e+08	1.12773e+08	8.04256e+07	1.11747e+08	1.19376e+08	1.00814e+08	1.0061e+08	1.01682e+08	1.0269e+08	1.12498e+08
Q04970	GTPase NRas OS=Rattus norvegicus OX=10116 GN=Nras PE=1 SV=1	1.20385e+07	1.5685e+07	1.41673e+07	1.22206e+07	1.53547e+07	1.03176e+07	1.30656e+07	20276938	1.72329e+07	1.45942e+07	1.16602e+07	1.67211e+07		1.41402e+07	1.19948e+07
D4ABI6	Ubiquitin carboxyl-terminal hydrolase OS=Rattus norvegicus OX=10116 GN=Uchl3 PE=1 SV=2	2.74598e+08	2.54696e+08	2.56651e+08	2.36248e+08	2.56514e+08	2.91337e+08	2.68093e+08	2.39518e+08	2.63957e+08	3.0348e+08	2.76548e+08	3.06276e+08	2.4608e+08	2.14824e+08	2.43019e+08
A0A096MIX2	DEAD (Asp-Glu-Ala-Asp) box polypeptide 17, isoform CRA_a OS=Rattus norvegicus OX=10116 GN=Ddx17 PE=1 SV=1	1.11281e+08	1.14792e+08	7.08826e+07	1.09577e+08	8.45398e+07	1.17963e+08	1.17223e+08	100372093	1.30653e+08	1.08608e+08	9.78627e+07	1.49325e+08	1.08128e+08	1.40465e+08	1.22833e+08
D3ZLT1	NADH dehydrogenase (Ubiquinone) 1 beta subcomplex, 7 (Predicted) OS=Rattus norvegicus OX=10116 GN=Ndufb7 PE=1 SV=1	5.86664e+08	6.32336e+08	6.92528e+08	6.1809e+08	5.67618e+08	5.98841e+08	5.88783e+08	643375463	6.14308e+08	5.55415e+08	5.48067e+08	5.62488e+08	6.16876e+08	5.11397e+08	5.94286e+08
D3ZAA9	MAGUK p55 subfamily member 2 OS=Rattus norvegicus OX=10116 GN=Mpp2 PE=1 SV=2	6.95392e+07	7.22655e+07	1.01434e+08	7.60647e+07	6.74895e+07	5.78554e+07	6.87652e+07	6.32812e+07	1.08713e+08	7.54383e+07	7.13351e+07	4.49412e+07	6.60926e+07	7.40972e+07	6.58255e+07
A0A0G2JT78	RAB6B, member RAS oncogene family OS=Rattus norvegicus OX=10116 GN=Rab6b PE=4 SV=1	4.6097e+07	4.46019e+07	3.8788e+07	3.60344e+07	3.44122e+07	4.02607e+07	6.34801e+07	3.73879e+07	5.08851e+07	6.32361e+07	4.14455e+07	4.40944e+07	4.47131e+07	4.04214e+07	4.68024e+07
P84076	Neuron-specific calcium-binding protein hippocalcin OS=Rattus norvegicus OX=10116 GN=Hpca PE=1 SV=2	1.22274e+08	1.7888e+08	1.98327e+08	1.94434e+08	1.91862e+08	1.73564e+08	1.76824e+08	184235684	3.26433e+08	1.86111e+08	1.9168e+08	1.62132e+08	2.0317e+08	1.85491e+08	1.59558e+08
A0A0G2K3I9	Dual-specificity phosphatase 3 OS=Rattus norvegicus OX=10116 GN=Dusp3 PE=1 SV=1	2.25456e+08	2.30301e+08	2.41195e+08	2.10652e+08	2.26313e+08	1.70579e+08	2.42433e+08	225615823	2.68855e+08	1.99998e+08	2.12067e+08	2.42323e+08	2.21553e+08	2.35271e+08	2.36594e+08
Q64537	Calpain small subunit 1 OS=Rattus norvegicus OX=10116 GN=Capns1 PE=1 SV=3	2.67242e+08	2.61341e+08	3.37095e+08	3.27854e+08	3.05735e+08	3.04854e+08	2.69646e+08	2.8822e+08	2.5861e+08	2.46737e+08	2.21717e+08	2.29156e+08	2.93348e+08	2.93539e+08	2.81012e+08
Q5I0D7	Xaa-Pro dipeptidase OS=Rattus norvegicus OX=10116 GN=Pepd PE=2 SV=1	2.18785e+08	2.08749e+08	2.35667e+08	2.1455e+08	2.18812e+08	2.2125e+08	2.22955e+08	2.68233e+08	1.83556e+08	2.20838e+08	2.11125e+08	2.35239e+08	2.11976e+08	2.03744e+08	2.10343e+08
O35964	Endophilin-A2 OS=Rattus norvegicus OX=10116 GN=Sh3gl1 PE=1 SV=1	4.73209e+07	4.91736e+07	4.41976e+07	4.61032e+07	4.63343e+07	4.1871e+07	4.52643e+07	43172426	5.27246e+07	4.11011e+07	4.434e+07	2.86756e+07	4.46949e+07	4.53055e+07	3.76976e+07
Q6GMN2	Brain-specific angiogenesis inhibitor 1-associated protein 2 OS=Rattus norvegicus OX=10116 GN=Baiap2 PE=1 SV=1	1.95922e+08	2.05756e+08	2.2728e+08	2.08609e+08	2.18958e+08	1.79113e+08	1.89376e+08	199908066	3.95444e+08	2.25767e+08	2.08457e+08	1.76884e+08	2.18097e+08	2.20475e+08	2.13295e+08
G3V803	Cadherin-2 OS=Rattus norvegicus OX=10116 GN=Cdh2 PE=1 SV=1	8.90327e+07	7.49992e+07	6.46416e+07	5.80611e+07	7.86196e+07	8.06644e+07	8.13151e+07	6.48758e+07	8.30639e+07	9.41926e+07	8.21905e+07	7.33951e+07	7.67438e+07	7.47877e+07	6.51729e+07
O35550	Rab GTPase-binding effector protein 1 OS=Rattus norvegicus OX=10116 GN=Rabep1 PE=1 SV=1	9.69893e+07	1.19305e+08	1.21427e+08	9.2762e+07	9.42712e+07	1.27705e+08	1.28315e+08	8.30252e+07	8.98787e+07	1.29308e+08	1.02946e+08	1.06121e+08	1.05497e+08	9.49976e+07	1.03909e+08
B2GVB7	N-acylaminoacyl-peptide hydrolase OS=Rattus norvegicus OX=10116 GN=Apeh PE=2 SV=1	1.47535e+08	1.49799e+08	1.27507e+08	1.30979e+08	1.60718e+08	1.32461e+08	1.63334e+08	1.24554e+08	1.37043e+08	1.66608e+08	1.53483e+08	1.66433e+08	1.68154e+08	1.4897e+08	1.48934e+08
A0A0G2JU96	AHNAK nucleoprotein OS=Rattus norvegicus OX=10116 GN=Ahnak PE=1 SV=1	1.58267e+08	1.46327e+08	1.92119e+08	4.01021e+08	4.55049e+08	4.65894e+08	1.46727e+08	524138288	3.10728e+08	1.45068e+08	1.01795e+08	9.31621e+07	1.7601e+08	1.52601e+08	1.8301e+08
P21913	Succinate dehydrogenase [ubiquinone] iron-sulfur subunit, mitochondrial OS=Rattus norvegicus OX=10116 GN=Sdhb PE=2 SV=2	1.07454e+09	1.07297e+09	1.1216e+09	9.69474e+08	1.05768e+09	1.08087e+09	8.80606e+08	1.05208e+09	1.1252e+09	1.05416e+09	1.17382e+09	1.12867e+09	1.07097e+09	1.00989e+09	1.03327e+09
D3ZT36	ADAM metallopeptidase domain 23 OS=Rattus norvegicus OX=10116 GN=Adam23 PE=4 SV=1	1.91658e+08	1.52447e+08	2.26842e+08	1.37152e+08	1.48448e+08	1.44453e+08	1.94153e+08	1.81408e+08	1.79834e+08	1.92384e+08	1.82201e+08	1.41888e+08	2.01823e+08	1.39968e+08	1.92624e+08
A0A0G2K5E4	DnaJ heat shock protein family (Hsp40) member A3 OS=Rattus norvegicus OX=10116 GN=Dnaja3 PE=1 SV=1	1.50529e+08	1.53824e+08	1.75715e+08	1.47411e+08	1.49944e+08	1.5221e+08	1.57435e+08	1.44197e+08	1.57272e+08	1.32411e+08	1.24081e+08	1.16473e+08	1.57231e+08	1.55964e+08	1.58104e+08
G3V8U9	Proteasome subunit beta OS=Rattus norvegicus OX=10116 GN=Psmb4 PE=1 SV=2	3.31972e+08	3.57529e+08	3.30539e+08	3.28361e+08	3.54237e+08	3.96821e+08	3.31823e+08	306314042	3.21522e+08	4.00387e+08	3.93082e+08	3.83705e+08	3.43688e+08	3.39066e+08	3.54487e+08
Q9JLX3	Glutathione S-transferase (Fragment) OS=Rattus norvegicus OX=10116 GN=GST PE=2 SV=1	4.47186e+08	4.51793e+08	4.16117e+08	3.44277e+08	4.03885e+08	5.85371e+08	4.18474e+08	4.21877e+08	3.37528e+08	4.57933e+08	3.05117e+08	3.90282e+08	3.70609e+08	4.53144e+08	3.79698e+08
A0A0H2UHI7	ATPase family AAA domain-containing protein 1 OS=Rattus norvegicus OX=10116 GN=Atad1 PE=1 SV=1	1.12756e+08	1.32572e+08	1.54384e+08	1.57312e+08	1.45419e+08	1.32456e+08	1.23572e+08	1.50342e+08	1.34509e+08	1.58929e+08	1.91257e+08	1.56104e+08	1.30291e+08	1.12705e+08	1.65607e+08
Q568Z9	Phytanoyl-CoA hydroxylase-interacting protein OS=Rattus norvegicus OX=10116 GN=Phyhip PE=2 SV=1	2.85667e+08	3.01053e+08	3.15523e+08	3.00736e+08	3.03346e+08	2.86226e+08	3.10246e+08	286737115	3.82693e+08	2.98723e+08	2.88613e+08	2.88354e+08	3.14164e+08	3.14555e+08	3.20426e+08
Q7M0E3	Destrin OS=Rattus norvegicus OX=10116 GN=Dstn PE=1 SV=3	1.14975e+09	1.24023e+09	1.15443e+09	1.21977e+09	1.21806e+09	1.11485e+09	1.10266e+09	1.20873e+09	1.15199e+09	7.83463e+08	1.07672e+09	1.1925e+09	1.15865e+09	1.18126e+09	1.23191e+09
P25093	Fumarylacetoacetase OS=Rattus norvegicus OX=10116 GN=Fah PE=1 SV=1	1.77086e+08	1.91598e+08	2.02218e+08	2.15753e+08	1.79715e+08	2.02432e+08	1.73277e+08	1.96677e+08	1.83178e+08	1.58121e+08	1.93456e+08	2.33426e+08	1.81728e+08	2.15747e+08	1.88075e+08
G3V9V3	Cytoplasmic dynein 1 intermediate chain 2 OS=Rattus norvegicus OX=10116 GN=Dync1i2 PE=1 SV=3	8.97019e+07	1.30155e+08	1.04493e+08	9.64459e+07	1.76479e+08	1.391e+08	1.14217e+08	90478234	1.00781e+08	1.17481e+08	7.98265e+07	9.69481e+07	1.19352e+08	9.57081e+07	1.01655e+08
P11497	Acetyl-CoA carboxylase 1 OS=Rattus norvegicus OX=10116 GN=Acaca PE=1 SV=1	2.44723e+08	2.69233e+08	2.76983e+08	2.33352e+08	2.34347e+08	2.12215e+08	2.46091e+08	2.28476e+08	2.00105e+08	2.23124e+08	2.52337e+08	2.25313e+08	2.32275e+08	2.26607e+08	2.58012e+08
B2RYA5	Cars protein (Fragment) OS=Rattus norvegicus OX=10116 GN=Cars PE=2 SV=1	1.37886e+08	1.23328e+08	1.54356e+08	1.34751e+08	1.50681e+08	1.25879e+08	1.30929e+08	1.30218e+08	1.4711e+08	1.60224e+08	1.51172e+08	1.05056e+08	1.34186e+08	1.26869e+08	1.50694e+08
B5DFI9	Pdk3 protein OS=Rattus norvegicus OX=10116 GN=Pdk3 PE=2 SV=1	1.73929e+08	1.47076e+08	1.61853e+08	1.46407e+08	1.40908e+08	1.57163e+08	1.6524e+08	176064955	2.02654e+08	1.24111e+08	1.42416e+08	1.54278e+08	1.80516e+08	1.5838e+08	1.83873e+08
Q566E4	Heterogeneous nuclear ribonucleoprotein R OS=Rattus norvegicus OX=10116 GN=Hnrnpr PE=1 SV=1	1.19731e+08	1.33451e+08	1.29039e+08	1.04532e+08	1.05509e+08	9.38276e+07	1.09641e+08	106368695	1.56941e+08	1.2908e+08	8.50336e+07	5.79327e+07	1.00692e+08	1.17574e+08	1.15258e+08
P62994	Growth factor receptor-bound protein 2 OS=Rattus norvegicus OX=10116 GN=Grb2 PE=1 SV=1	3.44947e+08	3.55572e+08	3.55937e+08	3.32874e+08	3.59637e+08	4.13068e+08	3.48653e+08	3.34991e+08	3.72655e+08	4.07753e+08	3.92136e+08	3.84548e+08	3.56804e+08	3.54993e+08	3.40184e+08
B1WBY1	Cul1 protein OS=Rattus norvegicus OX=10116 GN=Cul1 PE=1 SV=1	1.29205e+08	1.4856e+08	1.55063e+08	1.75316e+08	1.58479e+08	1.3324e+08	1.70426e+08	1.31024e+08	1.32092e+08	1.47391e+08	1.64737e+08	1.7076e+08	1.38135e+08	1.42944e+08	1.32961e+08
A0A0G2JTW1	RCG36946 OS=Rattus norvegicus OX=10116 GN=Rap2a PE=4 SV=1	1.29397e+08	1.34946e+08	1.36149e+08	1.09185e+08	1.23052e+08	1.19884e+08	1.35445e+08	1.13015e+08	1.15565e+08	1.22723e+08	1.33814e+08	1.08464e+08	1.27581e+08	1.24262e+08	1.33861e+08
D3ZLC1	Lamin B2 OS=Rattus norvegicus OX=10116 GN=Lmnb2 PE=1 SV=2	1.23639e+08	1.53116e+08	1.46068e+08	1.63998e+08	1.44498e+08	1.1449e+08	1.495e+08	124623400	1.04623e+08	1.25663e+08	1.2845e+08	1.28327e+08	1.54763e+08	1.43114e+08	1.55995e+08
P23978	Sodium- and chloride-dependent GABA transporter 1 OS=Rattus norvegicus OX=10116 GN=Slc6a1 PE=1 SV=1	9.6186e+08	9.77907e+08	1.06627e+09	9.7318e+08	8.1403e+08	8.15072e+08	9.01229e+08	924038612	9.05127e+08	8.81835e+08	8.56515e+08	9.83118e+08	9.72653e+08	9.6105e+08	1.10874e+09
Q9Z272	ARF GTPase-activating protein GIT1 OS=Rattus norvegicus OX=10116 GN=Git1 PE=1 SV=1	3.29147e+08	3.7493e+08	4.11873e+08	3.58809e+08	3.71257e+08	3.0715e+08	3.74995e+08	354808622	3.96379e+08	3.17182e+08	3.4365e+08	2.57153e+08	3.69524e+08	3.44063e+08	3.75814e+08
A0A0G2JWA9	Citron rho-interacting serine/threonine kinase OS=Rattus norvegicus OX=10116 GN=Cit PE=1 SV=1	7.81566e+07	7.99998e+07	9.44001e+07	8.12584e+07	7.34898e+07	7.13319e+07	8.52652e+07	7.52824e+07	8.19683e+07	7.50475e+07	7.60193e+07	5.43951e+07	9.13631e+07	6.93594e+07	8.56607e+07
P09495	Tropomyosin alpha-4 chain OS=Rattus norvegicus OX=10116 GN=Tpm4 PE=1 SV=3	1.20648e+08	1.22537e+08	1.34424e+08	1.58328e+08	1.37032e+08	1.6188e+08	1.23674e+08	163078228	1.24475e+08	1.16621e+08	1.2277e+08	1.11985e+08	9.42297e+07	1.21058e+08	1.11758e+08
Q5FVG5	Similar to tropomyosin 1, embryonic fibroblast-rat, isoform CRA_c OS=Rattus norvegicus OX=10116 GN=Tpm2 PE=2 SV=1	1.52659e+08	1.16119e+08	1.38312e+08	1.67001e+08	3.99335e+08	4.27449e+08	1.18655e+08	595180760	2.80096e+08	1.39023e+08	1.2724e+08	1.30299e+08	1.67263e+08	1.18915e+08	1.37228e+08
I6L9G6	RCG31562, isoform CRA_c OS=Rattus norvegicus OX=10116 GN=Tardbp PE=1 SV=1	3.35214e+08	3.60945e+08	3.66432e+08	3.62968e+08	3.17802e+08	3.82354e+08	4.19693e+08	319886280	3.32579e+08	3.60919e+08	4.10945e+08	2.66763e+08	3.47858e+08	3.75291e+08	3.58536e+08
Q3B8Q2	Eukaryotic initiation factor 4A-III OS=Rattus norvegicus OX=10116 GN=Eif4a3 PE=1 SV=1	1.0122e+08	1.22585e+08	1.10319e+08	1.16211e+08	1.12453e+08	9.86299e+07	1.09743e+08	95594664	1.09061e+08	1.20596e+08	1.29341e+08	1.19565e+08	1.12554e+08	1.24793e+08	1.26382e+08
F1MAA7	Laminin subunit gamma 1 OS=Rattus norvegicus OX=10116 GN=Lamc1 PE=1 SV=1	8.99858e+07	9.42929e+07	1.01745e+08	9.2386e+07	1.01845e+08	1.08312e+08	6.71218e+07	1.18061e+08	8.68629e+07	7.45832e+07	5.40084e+07	5.51861e+07	8.2861e+07	6.78485e+07	9.18976e+07
P17425	Hydroxymethylglutaryl-CoA synthase, cytoplasmic OS=Rattus norvegicus OX=10116 GN=Hmgcs1 PE=1 SV=1	1.35406e+08	1.49683e+08	1.44577e+08	1.71075e+08	1.62843e+08	1.73728e+08	1.39164e+08	135206546	1.24327e+08	1.8693e+08	1.62547e+08	1.80367e+08	1.50432e+08	1.16244e+08	9.23437e+07
Q5FWY5	AH receptor-interacting protein OS=Rattus norvegicus OX=10116 GN=Aip PE=1 SV=1	1.44762e+08	1.44678e+08	1.54782e+08	1.47908e+08	1.41685e+08	1.85221e+08	1.37814e+08	1.46075e+08	1.42579e+08	1.69645e+08	1.62935e+08	1.81696e+08	1.68706e+08	1.24033e+08	1.3857e+08
Q9EQX9	Ubiquitin-conjugating enzyme E2 N OS=Rattus norvegicus OX=10116 GN=Ube2n PE=1 SV=1	1.35689e+09	1.48906e+09	1.56898e+09	1.41024e+09	1.39071e+09	1.35186e+09	1.47018e+09	1.49403e+09	1.4472e+09	1.5521e+09	1.41163e+09	1.49592e+09	1.41768e+09	1.44519e+09	1.50401e+09
A0A0G2K2K1	Phosphodiesterase OS=Rattus norvegicus OX=10116 GN=Pde1a PE=3 SV=1	1.1829e+08	9.83918e+07	9.85789e+07	9.72619e+07	8.66104e+07	8.34448e+07	9.82977e+07	9.32838e+07	1.14403e+08	9.92967e+07	1.2573e+08	1.1176e+08	1.04375e+08	1.25003e+08	1.18331e+08
D4ADS4	Microsomal glutathione S-transferase 3 OS=Rattus norvegicus OX=10116 GN=Mgst3 PE=1 SV=1	6.89884e+07	1.0988e+08	9.129e+07	8.1893e+07	1.03888e+08	7.36638e+07	1.04217e+08	7.19253e+07	1.11565e+08	1.04868e+08	1.12762e+08	1.07869e+08	1.03754e+08	8.68171e+07	9.44888e+07
O35796	Complement component 1 Q subcomponent-binding protein, mitochondrial OS=Rattus norvegicus OX=10116 GN=C1qbp PE=1 SV=2	5.70662e+08	6.02729e+08	4.73695e+08	4.70727e+08	5.42246e+08	5.55026e+08	5.79819e+08	5.13614e+08	6.00877e+08	5.62018e+08	5.93296e+08	4.69425e+08	5.73337e+08	4.17567e+08	5.09087e+08
P63322	Ras-related protein Ral-A OS=Rattus norvegicus OX=10116 GN=Rala PE=1 SV=1	1.93994e+08	1.67693e+08	1.73584e+08	1.88335e+08	1.7563e+08	1.84079e+08	1.93831e+08	192889404	1.91643e+08	1.74496e+08	1.70383e+08	2.0364e+08	1.8415e+08	1.96163e+08	1.67963e+08
A0A0G2JSQ4	Tropomyosin 1, alpha, isoform CRA_p OS=Rattus norvegicus OX=10116 GN=Tpm1 PE=1 SV=1	1.80983e+08	2.91892e+08	3.2972e+08	2.04555e+08	3.12088e+08	2.12502e+08	3.10277e+08	372807512	3.1414e+08	2.97204e+08	2.91329e+08	1.58374e+08	1.71149e+08	1.74033e+08	3.03946e+08
A0A0G2K0Q8	Sushi domain-containing 2 OS=Rattus norvegicus OX=10116 GN=Susd2 PE=1 SV=1	1.03142e+08	8.65076e+07	1.03481e+08	9.0155e+07	9.91448e+07	8.35699e+07	6.81298e+07	94285685	6.12563e+07	7.27861e+07	6.78679e+07	8.73246e+07	9.13713e+07	9.77799e+07	8.43127e+07
Q63151	Long-chain-fatty-acid--CoA ligase 3 OS=Rattus norvegicus OX=10116 GN=Acsl3 PE=1 SV=1	7.08771e+07	8.20005e+07	7.77186e+07	7.833e+07	8.89028e+07	1.03048e+08	8.94115e+07	77500620	8.02838e+07	1.06242e+08	1.13196e+08	9.71559e+07	8.20051e+07	8.28065e+07	9.06703e+07
Q4G079	Aminoacyl tRNA synthetase complex-interacting multifunctional protein 1 OS=Rattus norvegicus OX=10116 GN=Aimp1 PE=1 SV=1	7.58472e+07	1.33375e+08	8.49498e+07	1.24217e+08	9.40811e+07	1.03036e+08	1.18358e+08	116809294	1.26686e+08	8.81274e+07	9.41664e+07	9.365e+07	9.60657e+07	9.44995e+07	1.04805e+08
Q5U328	Nucleolin OS=Rattus norvegicus OX=10116 GN=Ncl PE=1 SV=1	8.9284e+07	1.31783e+08	2.05805e+08	7.17077e+07	7.23945e+07	9.63574e+07	7.37633e+07	1.17554e+08	4.11959e+08	1.20677e+08	1.85223e+07	4.4817e+07	7.35812e+07	1.45026e+08	1.21228e+08
D3ZUL3	Collagen type VI alpha 1 chain OS=Rattus norvegicus OX=10116 GN=Col6a1 PE=1 SV=1	1.72279e+07	9.61761e+06	3.18203e+07	1.68549e+08	1.12677e+08	1.2022e+08	1.33496e+07	2.00904e+08	6.86976e+07	1.41267e+07	1.29882e+07	9.77513e+06	1.99289e+07	3.32236e+07	1.8427e+07
O35142	Coatomer subunit beta' OS=Rattus norvegicus OX=10116 GN=Copb2 PE=1 SV=3	2.67288e+08	1.69216e+08	3.03643e+08	1.56215e+08	1.90048e+08	2.2373e+08	2.45445e+08	2.8221e+08	2.51381e+08	2.40743e+08	2.54967e+08	2.40715e+08	2.44682e+08	2.89884e+08	2.88233e+08
B2RZA9	Ube2l3 protein OS=Rattus norvegicus OX=10116 GN=Ube2l3 PE=2 SV=1	5.57739e+08	5.44891e+08	5.42411e+08	5.09723e+08	5.01531e+08	5.07131e+08	5.46043e+08	5.29149e+08	5.15496e+08	5.41647e+08	5.07551e+08	5.12603e+08	5.39778e+08	5.03409e+08	5.58367e+08
D3Z981	Plexin A1 OS=Rattus norvegicus OX=10116 GN=Plxna1 PE=1 SV=3	4.19299e+07	4.38486e+07	3.92114e+07	3.55058e+07	4.5107e+07	4.08953e+07	4.61138e+07	4.26717e+07	3.64351e+07	4.66409e+07	3.90146e+07	4.67075e+07	4.56393e+07	4.77219e+07	4.57099e+07
G3V6H9	Nucleosome assembly protein 1-like 1 OS=Rattus norvegicus OX=10116 GN=Nap1l1 PE=1 SV=1	8.55063e+07	9.01065e+07	8.31127e+07	7.97119e+07	8.60919e+07	8.29291e+07	8.78612e+07	8.84015e+07	9.84039e+07	9.4392e+07	9.69224e+07	9.72728e+07	8.49855e+07	9.04473e+07	7.60596e+07
F1LPS8	Transcriptional activator protein Pur-alpha OS=Rattus norvegicus OX=10116 GN=Pura PE=1 SV=3	8.15479e+08	9.82799e+08	8.90778e+08	8.57333e+08	9.66455e+08	8.72216e+08	1.01067e+09	533321635	9.02044e+08	1.0188e+09	1.03746e+09	8.91407e+08	9.67849e+08	1.03814e+09	9.2158e+08
F1LQY6	N-terminal EF-hand calcium-binding protein 2 OS=Rattus norvegicus OX=10116 GN=Necab2 PE=1 SV=3	1.47122e+08	1.4158e+08	1.43796e+08	1.53451e+08	1.37167e+08	1.35885e+08	1.58011e+08	1.33775e+08	1.56243e+08	1.38625e+08	1.2217e+08	1.18608e+08	1.3638e+08	1.45029e+08	1.45471e+08
A0A0G2JY43	Fatty aldehyde dehydrogenase OS=Rattus norvegicus OX=10116 GN=Aldh3a2 PE=1 SV=1	2.48006e+08	2.77762e+08	2.95613e+08	3.06933e+08	2.44501e+08	2.69846e+08	2.98907e+08	2.9142e+08	2.42875e+08	3.03568e+08	2.75548e+08	2.70186e+08	2.59511e+08	2.39561e+08	2.91102e+08
D4A5J1	Kelch repeat and BTB domain-containing 11 OS=Rattus norvegicus OX=10116 GN=Kbtbd11 PE=1 SV=1	1.87828e+08	1.96726e+08	1.97487e+08	1.9332e+08	1.5095e+08	1.80567e+08	1.53911e+08	183467633	1.56576e+08	1.82229e+08	1.78763e+08	1.58859e+08	1.88766e+08	1.65066e+08	2.01134e+08
Q3KRD5	Mitochondrial import receptor subunit TOM34 OS=Rattus norvegicus OX=10116 GN=Tomm34 PE=1 SV=1	1.71205e+08	1.82459e+08	1.91754e+08	1.66115e+08	1.66993e+08	1.49899e+08	1.91465e+08	1.69359e+08	1.44877e+08	2.0395e+08	1.87035e+08	1.89563e+08	1.68479e+08	1.90381e+08	1.7428e+08
F1LPA3	IQ motif and SEC7 domain-containing protein 3 OS=Rattus norvegicus OX=10116 GN=Iqsec3 PE=1 SV=1	1.02167e+08	8.33649e+07	1.05265e+08	8.55354e+07	9.59861e+07	1.06182e+08	9.21678e+07	8.47144e+07	9.46176e+07	6.98183e+07	9.796e+07	8.693e+07	9.66966e+07	8.82262e+07	8.74999e+07
D3ZW55	Inosine triphosphate pyrophosphatase OS=Rattus norvegicus OX=10116 GN=Itpa PE=3 SV=1	3.40524e+08	3.41631e+08	3.74606e+08	3.10459e+08	3.59216e+08	2.87023e+08	3.25407e+08	3.13551e+08	3.42722e+08	3.30552e+08	3.2079e+08	3.07822e+08	3.0986e+08	3.19709e+08	3.56554e+08
D3ZC63	Cytidine/uridine monophosphate kinase 2 OS=Rattus norvegicus OX=10116 GN=Cmpk2 PE=1 SV=3	1.35481e+08	1.60795e+08	1.54752e+08	1.3707e+08	1.35253e+08	1.14509e+08	1.19142e+08	1.55493e+08	1.37194e+08	1.52227e+08	1.4945e+08	1.37574e+08	1.54724e+08	1.41243e+08	1.42558e+08
P27867	Sorbitol dehydrogenase OS=Rattus norvegicus OX=10116 GN=Sord PE=1 SV=4	2.10013e+08	2.01808e+08	1.85821e+08	2.32829e+08	1.90574e+08	2.11706e+08	2.00758e+08	1.95225e+08	1.81682e+08	1.92123e+08	1.69229e+08	2.06682e+08	2.00419e+08	2.07692e+08	1.95459e+08
D3ZML2	Serine/threonine-protein kinase BRSK2 OS=Rattus norvegicus OX=10116 GN=Brsk2 PE=1 SV=1	8.97621e+07	9.26154e+07	9.57978e+07	1.03777e+08	8.32896e+07	9.06051e+07	8.64609e+07	86516042	8.45454e+07	9.98378e+07	8.93956e+07	8.56609e+07	8.15861e+07	7.27011e+07	9.98447e+07
P09895	60S ribosomal protein L5 OS=Rattus norvegicus OX=10116 GN=Rpl5 PE=1 SV=3	5.21841e+08	4.99082e+08	5.22945e+08	4.9367e+08	4.43865e+08	4.36692e+08	4.23135e+08	4.94946e+08	4.7954e+08	4.82792e+08	4.45062e+08	4.61174e+08	4.8321e+08	4.64144e+08	5.10516e+08
F1LRV6	GMP reductase OS=Rattus norvegicus OX=10116 GN=Gmpr PE=3 SV=1	9.97967e+07	8.30052e+07	1.2052e+08	1.13961e+08	1.03316e+08	8.62892e+07	1.06844e+08	1.05031e+08	1.17034e+08	9.84405e+07	1.0461e+08	1.22546e+08	1.11236e+08	1.16699e+08	1.10626e+08
Q6Q7Y5	Guanine nucleotide-binding protein subunit alpha-13 OS=Rattus norvegicus OX=10116 GN=Gna13 PE=1 SV=1	2.51657e+08	2.46405e+08	2.47996e+08	2.45074e+08	2.40615e+08	2.30238e+08	2.39805e+08	240068558	1.78318e+08	2.42058e+08	2.20681e+08	2.84153e+08	2.44453e+08	2.30174e+08	3.05247e+08
A0A140TAA4	Programmed cell death 6-interacting protein OS=Rattus norvegicus OX=10116 GN=Pdcd6ip PE=1 SV=1	2.03137e+06	7.49768e+06		6.54726e+06	4.30874e+06	3.2016e+06	2.22599e+06	4270274	2.66515e+08	2.70265e+06		4.62243e+06	934884	4.89096e+06
Q5HZE4	Methylthioribose-1-phosphate isomerase OS=Rattus norvegicus OX=10116 GN=Mri1 PE=1 SV=1	8.07577e+07	9.86803e+07	7.7687e+07	5.37319e+07	7.03275e+07	8.38926e+07	1.04477e+08	52255824	6.1762e+07	6.86533e+07	7.33742e+07	7.88719e+07	7.50553e+07	6.88691e+07	7.09719e+07
Q3MHT2	Cysteine desulfurase, mitochondrial OS=Rattus norvegicus OX=10116 GN=Nfs1 PE=1 SV=1	1.67576e+08	1.78047e+08	1.73428e+08	1.6532e+08	1.49129e+08	1.60203e+08	1.60003e+08	1.74413e+08	1.41202e+08	1.55854e+08	1.50742e+08	1.55705e+08	1.72255e+08	1.57583e+08	1.67402e+08
B5DFC6	Glucosamine-6-phosphate isomerase OS=Rattus norvegicus OX=10116 GN=Gnpda1 PE=2 SV=1	7.404e+07	7.85018e+07	8.44819e+07	6.97804e+07	6.86631e+07	5.87321e+07	7.09462e+07	55321086	6.22654e+07	7.1038e+07	8.57135e+07	7.63825e+07	8.05691e+07	7.55919e+07	7.86623e+07
G3V8D5	6-phosphogluconolactonase OS=Rattus norvegicus OX=10116 GN=Pgls PE=1 SV=1	2.73594e+08	2.85888e+08	2.58073e+08	2.70191e+08	2.57838e+08	2.52492e+08	2.46706e+08	2.69039e+08	2.76631e+08	2.04121e+08	2.39399e+08	2.59283e+08	2.60047e+08	2.71533e+08	2.6942e+08
Q5QJC9	BAG family molecular chaperone regulator 5 OS=Rattus norvegicus OX=10116 GN=Bag5 PE=1 SV=1	8.99372e+07	8.69342e+07	9.17021e+07	1.01481e+08	9.66718e+07	9.66816e+07	8.17788e+07	8.95987e+07	8.96941e+07	9.70925e+07	8.62861e+07	7.93845e+07	8.92234e+07	8.93233e+07	9.01638e+07
A0A0F7RQJ6	D-dopachrome tautomerase, isoform CRA_a OS=Rattus norvegicus OX=10116 GN=Ddt PE=1 SV=1	8.99351e+08	9.37049e+08	8.97401e+08	8.86647e+08	8.98802e+08	1.06853e+09	9.4317e+08	9.60022e+08	9.16953e+08	1.40549e+09	1.38116e+09	1.33954e+09	8.83072e+08	8.81907e+08	8.62267e+08
P40307	Proteasome subunit beta type-2 OS=Rattus norvegicus OX=10116 GN=Psmb2 PE=1 SV=1	3.58036e+08	3.791e+08	3.95284e+08	3.66032e+08	3.86009e+08	3.59141e+08	3.68046e+08	3.8863e+08	3.4894e+08	4.18696e+08	3.87896e+08	4.06806e+08	3.91832e+08	3.85587e+08	4.2132e+08
Q68FZ8	Propionyl coenzyme A carboxylase, beta polypeptide OS=Rattus norvegicus OX=10116 GN=Pccb PE=1 SV=1	1.22131e+08	1.41691e+08	1.36819e+08	1.83133e+08	1.33973e+08	1.26778e+08	1.50555e+08	1.79488e+08	1.36124e+08	1.46553e+08	1.4482e+08	1.3134e+08	1.56131e+08	1.71943e+08	1.88724e+08
A0A0G2JSY3	Neurolysin (Metallopeptidase M3 family), isoform CRA_a OS=Rattus norvegicus OX=10116 GN=Nln PE=1 SV=1	1.34269e+08	1.29082e+08	1.20116e+08	1.3517e+08	1.22397e+08	1.23581e+08	1.25946e+08	131114645	1.35632e+08	1.568e+08	1.43081e+08	1.46724e+08	1.3422e+08	1.22138e+08	1.28495e+08
F1LRB8	S-adenosylmethionine synthase OS=Rattus norvegicus OX=10116 GN=Mat2a PE=1 SV=2	1.3359e+08	1.26827e+08	1.38596e+08	1.37701e+08	1.58195e+08	1.40835e+08	9.15123e+07	1.31479e+08	1.31153e+08	1.57362e+08	1.39087e+08	1.51729e+08	1.39557e+08	1.0104e+08	1.34792e+08
Q8VHK7	Hepatoma-derived growth factor OS=Rattus norvegicus OX=10116 GN=Hdgf PE=1 SV=2	1.53552e+08	1.4987e+08	1.59068e+08	1.48956e+08	1.27013e+08	1.22776e+08	1.34889e+08	1.33806e+08	1.62107e+08	1.43087e+08	1.27997e+08	1.16391e+08	1.42645e+08	1.43831e+08	1.45811e+08
A0A0G2K5B0	TBC1 domain family, member 24 OS=Rattus norvegicus OX=10116 GN=Tbc1d24 PE=1 SV=1	1.0035e+08	1.1209e+08	1.05071e+08	1.13186e+08	1.23198e+08	9.75597e+07	8.97845e+07	1.00483e+08	9.93036e+07	1.09803e+08	1.03569e+08	6.56731e+07	1.25492e+08	1.09272e+08	1.18026e+08
F8WFT7	Anion exchange protein OS=Rattus norvegicus OX=10116 GN=Slc4a1 PE=1 SV=1	9.47642e+07	3.01317e+07	3.67991e+07	5.06899e+07	9.41157e+07	6.23353e+07	7.40422e+07	1.17552e+08	4.63047e+07	2.69207e+07	7.94898e+07	3.76545e+07	5.11119e+07	1.00221e+08	6.75488e+07
F1LRJ9	Methanethiol oxidase OS=Rattus norvegicus OX=10116 GN=Selenbp1 PE=1 SV=2	1.31328e+08	1.27469e+08	1.58573e+08	1.32071e+08	1.52825e+08	1.35625e+08	1.4275e+08	1.60737e+08	1.41867e+08	1.34771e+08	1.15101e+08	1.24313e+08	1.27653e+08	1.52481e+08	1.29976e+08
B2GV54	Neutral cholesterol ester hydrolase 1 OS=Rattus norvegicus OX=10116 GN=Nceh1 PE=1 SV=1	1.33948e+08	1.63768e+08	1.53511e+08	1.11738e+08	1.26709e+08	1.24603e+08	1.3544e+08	1.43138e+08	1.51544e+08	1.32042e+08	1.33589e+08	1.38458e+08	1.23546e+08	1.55965e+08	1.74117e+08
Q99MI5	Spermidine synthase OS=Rattus norvegicus OX=10116 GN=LOC100912604 PE=1 SV=1	1.46504e+08	1.74445e+08	1.54651e+08	1.64862e+08	1.6977e+08	1.42742e+08	1.3909e+08	1.63894e+08	1.54179e+08	1.74296e+08	1.45181e+08	1.63721e+08	1.57604e+08	1.44539e+08	1.70146e+08
Q505J8	Phenylalanine--tRNA ligase alpha subunit OS=Rattus norvegicus OX=10116 GN=Farsa PE=1 SV=1	1.18883e+08	1.41748e+08	1.61898e+08	1.42306e+08	1.52317e+08	1.34908e+08	9.75921e+07	1.11494e+08	1.13231e+08	1.45295e+08	1.26005e+08	9.49426e+07	1.23177e+08	1.214e+08	1.48536e+08
P10818	Cytochrome c oxidase subunit 6A1, mitochondrial OS=Rattus norvegicus OX=10116 GN=Cox6a1 PE=1 SV=2	1.90816e+09	2.03457e+09	2.1642e+09	1.94709e+09	1.90276e+09	1.81063e+09	1.90115e+09	1.81854e+09	2.09389e+09	1.75171e+09	1.98508e+09	1.77176e+09	2.14761e+09	1.63371e+09	1.85676e+09
D4ABP4	Rab3 GTPase-activating protein non-catalytic subunit OS=Rattus norvegicus OX=10116 GN=Rab3gap2 PE=1 SV=3	1.1078e+07	1.04932e+07	1.50528e+07	1.4972e+07	1.5193e+07	1.24026e+07	1.44013e+07	12320996	1.37245e+07	1.58676e+07	1.66038e+07	1.26942e+07	1.41901e+07	1.13371e+07	1.39162e+07
P60901	Proteasome subunit alpha type-6 OS=Rattus norvegicus OX=10116 GN=Psma6 PE=1 SV=1	5.10838e+08	5.03391e+08	4.85175e+08	4.50736e+08	4.39321e+08	4.48868e+08	4.26985e+08	467436283	4.01403e+08	4.79595e+08	4.76125e+08	5.02304e+08	4.92374e+08	4.71549e+08	5.1859e+08
P18163	Long-chain-fatty-acid--CoA ligase 1 OS=Rattus norvegicus OX=10116 GN=Acsl1 PE=1 SV=1	1.57376e+08	1.66752e+08	1.70823e+08	1.85339e+08	1.80499e+08	1.92862e+08	1.51506e+08	192598809	1.56094e+08	1.82207e+08	1.76187e+08	1.69177e+08	1.72473e+08	1.68918e+08	1.75408e+08
A0A0G2K151	Apolipoprotein E OS=Rattus norvegicus OX=10116 GN=Apoe PE=1 SV=1	1.31141e+09	1.06404e+09	1.04376e+09	1.0807e+09	1.06876e+09	9.94093e+08	1.21037e+09	1040565659	1.16046e+09	1.33846e+09	1.58182e+09	1.47525e+09	1.07539e+09	1.0207e+09	1.08184e+09
F1M7N7	Ribosomal protein S6 kinase OS=Rattus norvegicus OX=10116 GN=Rps6ka2 PE=3 SV=2	1.03115e+08	1.17317e+08	1.27345e+08	1.16038e+08	1.09311e+08	1.18465e+08	1.07453e+08	8.66019e+07	9.28994e+07	1.51788e+08	1.22588e+08	1.15515e+08	1.08409e+08	1.03267e+08	1.24844e+08
P08010	Glutathione S-transferase Mu 2 OS=Rattus norvegicus OX=10116 GN=Gstm2 PE=1 SV=2	4.1891e+07	3.36045e+07	4.75754e+07	9.91875e+07	1.28447e+08	1.15938e+08	2.8608e+07	160519997	7.95921e+07	3.42061e+07	2.62916e+07	3.46407e+07	2.61286e+07	4.28421e+07	3.46576e+07
Q62824	Exocyst complex component 4 OS=Rattus norvegicus OX=10116 GN=Exoc4 PE=1 SV=1	1.1321e+08	9.77691e+07	9.84725e+07	1.24973e+08	1.01526e+08	1.18136e+08	1.11843e+08	1.12289e+08	1.15719e+08	1.27291e+08	1.03555e+08	1.0281e+08	9.88678e+07	9.53977e+07	1.1388e+08
G3V6X7	ProSAAS OS=Rattus norvegicus OX=10116 GN=LOC108348172 PE=1 SV=1	3.93456e+09	3.67081e+09	4.20743e+09	3.87772e+09	3.45235e+09	3.45674e+09	3.4296e+09	3304428558	2.71652e+09	4.17334e+09	3.26267e+09	3.25346e+09	3.75684e+09	3.60587e+09	4.03112e+09
F1LWT1	Calcium-dependent secretion activator 2 OS=Rattus norvegicus OX=10116 GN=Cadps2 PE=4 SV=3	4.21964e+07	4.3265e+07	4.32569e+07	4.16565e+07	3.92862e+07	4.23731e+07	4.40234e+07	39523578	3.50156e+07	4.33165e+07	3.46072e+07	3.29533e+07	4.39728e+07	4.1968e+07	4.3084e+07
O88506	STE20/SPS1-related proline-alanine-rich protein kinase OS=Rattus norvegicus OX=10116 GN=Stk39 PE=1 SV=2	8.31659e+07	6.68588e+07	7.06433e+07	8.57267e+07	8.15395e+07	7.64336e+07	7.9816e+07	7.37954e+07	7.21321e+07	8.01198e+07	9.19762e+07	9.64019e+07	6.85387e+07	6.64795e+07	8.61012e+07
D3ZN61	Leucine-rich repeat LGI family, member 3 OS=Rattus norvegicus OX=10116 GN=Lgi3 PE=4 SV=1	1.12734e+08	1.0801e+08	1.17727e+08	1.37443e+08	1.33539e+08	1.13618e+08	1.22088e+08	1.1373e+08	1.11037e+08	1.00023e+08	1.22409e+08	1.30901e+08	1.26821e+08	1.12099e+08	1.25878e+08
P20059	Hemopexin OS=Rattus norvegicus OX=10116 GN=Hpx PE=1 SV=3	3.23901e+08	1.59812e+08	1.88059e+08	1.87698e+08	2.01047e+08	2.19995e+08	1.99021e+08	261996762	1.37345e+08	2.01317e+08	3.48553e+08	1.66903e+08	2.04598e+08	2.47133e+08	1.76464e+08
D4ABT8	Heterogeneous nuclear ribonucleoprotein U-like 2 OS=Rattus norvegicus OX=10116 GN=Hnrnpul2 PE=1 SV=1	2.1069e+08	2.19975e+08	2.16113e+08	2.05934e+08	2.00692e+08	1.88273e+08	2.12111e+08	2.23462e+08	2.19101e+08	2.07593e+08	1.7401e+08	2.07852e+08	2.068e+08	1.99899e+08	2.19511e+08
D3ZAP9	Glycerol-3-phosphate dehydrogenase [NAD(+)] OS=Rattus norvegicus OX=10116 GN=Gpd1l PE=1 SV=1	3.19856e+08	3.68094e+08	3.07721e+08	3.63289e+08	3.4559e+08	3.24409e+08	3.03185e+08	3.54358e+08	3.87845e+08	3.64846e+08	3.22997e+08	3.37139e+08	3.63698e+08	3.46997e+08	3.21726e+08
B2RYK3	RCG56371 OS=Rattus norvegicus OX=10116 GN=Spr PE=1 SV=1	1.56651e+08	1.47032e+08	1.80627e+08	1.56149e+08	1.4619e+08	1.51624e+08	1.21106e+08	1.42829e+08	1.21976e+08	1.66458e+08	1.55747e+08	1.58507e+08	1.50001e+08	1.38269e+08	1.53115e+08
Q4G009	Malignant T-cell-amplified sequence 1 OS=Rattus norvegicus OX=10116 GN=Mcts1 PE=2 SV=1	1.12218e+08	1.26044e+08	1.09327e+08	1.16722e+08	1.32877e+08	1.23302e+08	8.24605e+07	1.06391e+08	1.10181e+08	1.39111e+08	1.48681e+08	1.5393e+08	8.41524e+07	1.14361e+08	1.11956e+08
B0K021	RCG45476, isoform CRA_d OS=Rattus norvegicus OX=10116 GN=Rpl7a PE=2 SV=1	5.30126e+08	5.14385e+08	4.88498e+08	5.02645e+08	4.93923e+08	4.48873e+08	4.82221e+08	5.42831e+08	5.09873e+08	5.36261e+08	4.27672e+08	4.89947e+08	4.95511e+08	5.21491e+08	4.7359e+08
D3ZK56	RAP2C, member of RAS oncogene family OS=Rattus norvegicus OX=10116 GN=Rap2c PE=1 SV=2	1.46324e+07	1.54852e+07	1.44539e+07	1.43359e+07	1.28771e+07	1.25392e+07	1.49754e+07	1.40316e+07	1.40758e+07	1.8098e+07	1.75387e+07	1.49124e+07	1.51891e+07	1.3101e+07	1.3257e+07
D3ZD73	DEAD-box helicase 6 OS=Rattus norvegicus OX=10116 GN=Ddx6 PE=1 SV=1	1.55578e+08	1.23028e+08	1.27568e+08	1.69175e+08	1.56859e+08	8.87794e+07	1.55935e+08	1.53384e+08	1.48946e+08	1.77736e+08	1.64846e+08	1.8834e+08	1.30799e+08	1.48535e+08	1.36908e+08
A6Y857	Phosphoinositide phospholipase C OS=Rattus norvegicus OX=10116 PE=2 SV=1										7.97248e+06	1.08197e+07	1.27161e+07
G3V6S3	Calumenin OS=Rattus norvegicus OX=10116 GN=Calu PE=1 SV=1	1.63865e+07	1.32414e+07	1.06293e+07	1.53195e+07	7.92629e+06	1.63092e+07	1.5623e+07	15970256	1.86507e+07	1.97117e+07	4.92934e+06	8.9996e+06	1.46555e+07	7.06271e+06	1.23024e+07
G3V699	Protein transport protein Sec31A OS=Rattus norvegicus OX=10116 GN=Sec31a PE=1 SV=1	1.61477e+08	1.86054e+08	1.84339e+08	2.31695e+08	2.4661e+08	2.1971e+08	1.93397e+08	2.01419e+08	2.97765e+08	1.0326e+08	2.10526e+08	2.16404e+08	2.20286e+08	1.90619e+08	1.33922e+08
P62824	Ras-related protein Rab-3C OS=Rattus norvegicus OX=10116 GN=Rab3c PE=1 SV=1	3.02208e+08	5.70395e+08	6.28664e+08	5.42387e+08	5.49438e+08	5.05028e+08	5.60741e+08	530866698	5.66635e+08	5.04733e+08	4.98654e+08	2.8244e+08	5.88779e+08	5.40386e+08	5.3978e+08
Q9WUS0	Adenylate kinase 4, mitochondrial OS=Rattus norvegicus OX=10116 GN=Ak4 PE=2 SV=1	4.58253e+08	4.61626e+08	5.15084e+08	4.4763e+08	4.12587e+08	3.98674e+08	4.50298e+08	447583965	3.75952e+08	5.0351e+08	4.59757e+08	4.90734e+08	4.48144e+08	4.58951e+08	4.50478e+08
P19468	Glutamate--cysteine ligase catalytic subunit OS=Rattus norvegicus OX=10116 GN=Gclc PE=1 SV=2	2.11591e+08	2.21176e+08	2.03415e+08	2.1842e+08	2.1663e+08	2.09674e+08	1.89716e+08	198265565	1.71317e+08	2.05088e+08	2.13471e+08	1.8469e+08	2.08815e+08	2.11182e+08	2.10464e+08
P31977	Ezrin OS=Rattus norvegicus OX=10116 GN=Ezr PE=1 SV=3	3.63153e+07	2.50176e+07	3.14653e+07	3.16022e+07	2.23965e+07	2.36914e+07	4.03349e+07	2.06182e+07	3.6664e+07	1.3943e+07	1.08718e+07	2.25249e+07	3.0707e+07	2.4109e+07	3.43539e+07
B4F7C7	Hebp1 protein OS=Rattus norvegicus OX=10116 GN=Hebp1 PE=1 SV=1	8.86155e+07	9.5405e+07	6.69121e+07	7.66583e+07	8.19377e+07	8.26862e+07	5.84993e+07	8.49822e+07	1.07387e+08	6.87616e+07	8.25759e+07	7.79711e+07	8.00608e+07	8.15161e+07	9.52727e+07
D4A4T9	Cysteine and histidine-rich domain-containing protein 1 OS=Rattus norvegicus OX=10116 GN=Chordc1 PE=3 SV=1	1.13979e+08	1.08007e+08	1.14989e+08	9.53871e+07	1.06089e+08	1.17896e+08	1.06947e+08	103015816	9.41668e+07	1.41555e+08	1.18522e+08	1.24286e+08	1.03947e+08	1.03638e+08	1.06277e+08
Q68FX9	NAD-dependent protein deacylase sirtuin-5, mitochondrial OS=Rattus norvegicus OX=10116 GN=Sirt5 PE=2 SV=1	2.05719e+08	2.11837e+08	1.84977e+08	1.88925e+08	2.19087e+08	1.287e+08	2.35986e+08	1.79207e+08	2.28362e+08	2.71457e+08	1.91978e+08	1.72411e+08	2.01553e+08	2.2508e+08	2.50421e+08
F2Z3T7	Isochorismatase domain-containing protein 1 OS=Rattus norvegicus OX=10116 GN=LOC103694869 PE=1 SV=1	2.5199e+08	2.56496e+08	2.49696e+08	2.43009e+08	2.27102e+08	2.22383e+08	2.28161e+08	234512756	2.1697e+08	2.3489e+08	2.24971e+08	2.84761e+08	2.45387e+08	2.37419e+08	2.47043e+08
Q6P9U0	Serine (Or cysteine) peptidase inhibitor, clade B, member 6a OS=Rattus norvegicus OX=10116 GN=Serpinb6a PE=1 SV=1	4.02412e+08	4.41196e+08	4.33325e+08	4.56874e+08	3.80702e+08	3.77656e+08	4.12746e+08	4.64631e+08	3.99821e+08	5.07896e+08	3.37405e+08	4.05013e+08	4.24548e+08	4.24813e+08	4.80465e+08
Q76EQ0	Serine racemase OS=Rattus norvegicus OX=10116 GN=Srr PE=1 SV=1	5.52273e+07	5.61304e+07	5.48031e+07	5.41266e+07	5.06073e+07	4.89229e+07	5.15295e+07	5.3255e+07	6.26223e+07	5.61749e+07	5.01337e+07	5.03906e+07	5.14064e+07	5.26501e+07	5.50124e+07
M0R735	Heterogeneous nuclear ribonucleoprotein Q OS=Rattus norvegicus OX=10116 GN=Syncrip PE=1 SV=2	8.47912e+07	1.59693e+08	1.06873e+08	1.04956e+08	6.87771e+07	7.21325e+07	6.00614e+07	59740339	1.11526e+08	1.09451e+08	6.99719e+07	9.47749e+07	6.9811e+07	1.23883e+08	9.48383e+07
Q6AXT5	Ras-related protein Rab-21 OS=Rattus norvegicus OX=10116 GN=Rab21 PE=2 SV=1	3.80481e+08	4.32669e+08	4.22901e+08	4.28263e+08	4.18988e+08	3.63662e+08	4.17403e+08	3.76302e+08	4.01389e+08	4.9235e+08	4.31775e+08	4.16821e+08	4.4096e+08	4.27174e+08	4.38056e+08
G3V784	ADP-dependent glucokinase OS=Rattus norvegicus OX=10116 GN=Adpgk PE=1 SV=1	1.76931e+08	1.84539e+08	1.54978e+08	1.99242e+08	1.68752e+08	1.63264e+08	1.44921e+08	188080233	1.64224e+08	7.78833e+07	5.8794e+07	7.97863e+07	1.64979e+08	1.88583e+08	1.5783e+08
G3V6T7	Protein disulfide-isomerase A4 OS=Rattus norvegicus OX=10116 GN=Pdia4 PE=1 SV=1	1.90573e+08	1.95793e+08	2.36925e+08	1.58745e+08	2.17165e+08	2.03254e+08	1.2907e+08	1.90735e+08	1.13255e+08	2.21332e+08	2.3524e+08	1.59018e+08	1.49807e+08	1.69548e+08	2.39666e+08
D3Z9H2	Hyaluronan and proteoglycan link protein 4 OS=Rattus norvegicus OX=10116 GN=Hapln4 PE=4 SV=1	1.23273e+08	1.11996e+08	1.3061e+08	9.69471e+07	1.18475e+08	9.14725e+07	1.09256e+08	1.17254e+08	6.9287e+07	7.87935e+07	9.37023e+07	8.49595e+07	1.08412e+08	7.83872e+07	8.18718e+07
A0A0G2JWK2	Methyl-CpG-binding protein 2 OS=Rattus norvegicus OX=10116 GN=Mecp2 PE=1 SV=1	1.36694e+08	1.46305e+08	1.40739e+08	1.83295e+08	1.28405e+08	1.6996e+08	1.4541e+08	1.24946e+08	1.85906e+08	1.25461e+08	1.05109e+08	8.83977e+07	1.66045e+08	1.76129e+08	1.48137e+08
F1MAA5	RAN GTPase-activating protein 1 OS=Rattus norvegicus OX=10116 GN=Rangap1 PE=1 SV=2	2.93746e+08	2.98305e+08	3.30978e+08	3.07408e+08	2.82487e+08	2.83399e+08	2.81712e+08	2.8303e+08	2.40117e+08	2.8968e+08	3.50973e+08	2.73529e+08	2.60909e+08	2.8351e+08	2.83487e+08
Q6AXM8	Serum paraoxonase/arylesterase 2 OS=Rattus norvegicus OX=10116 GN=Pon2 PE=2 SV=1	1.009e+08	1.20064e+08	9.8107e+07	9.92753e+07	9.94949e+07	8.92973e+07	9.59588e+07	1.14423e+08	8.15213e+07	1.31783e+08	1.16808e+08	1.09698e+08	9.61815e+07	1.08638e+08	9.85161e+07
E9PT53	Wolfram syndrome 1 homolog (Human) OS=Rattus norvegicus OX=10116 GN=Wfs1 PE=1 SV=2	6.33477e+07	1.17145e+08	1.00433e+08	8.54414e+07	8.04755e+07	7.92382e+07	7.96569e+07	8.80867e+07	2.34407e+08	7.88638e+07	8.95669e+07	7.89807e+07	8.85e+07	6.38669e+07	9.14854e+07
B0BNA5	Coactosin-like protein OS=Rattus norvegicus OX=10116 GN=Cotl1 PE=1 SV=1	1.0793e+09	1.04465e+09	9.61499e+08	1.09509e+09	1.14418e+09	1.37961e+09	1.04572e+09	948646695	9.77248e+08	1.48998e+09	1.23395e+09	1.32117e+09	9.66888e+08	1.01197e+09	9.85268e+08
P47727	Carbonyl reductase [NADPH] 1 OS=Rattus norvegicus OX=10116 GN=Cbr1 PE=1 SV=2
G3V9D1	Phosphoinositide phospholipase C OS=Rattus norvegicus OX=10116 GN=Plcd1 PE=1 SV=1
A0A0G2JTA1	Serine/threonine-protein phosphatase 2A 56 kDa regulatory subunit OS=Rattus norvegicus OX=10116 GN=Ppp2r5e PE=1 SV=1	1.83602e+08	1.83293e+08	1.84487e+08	1.7535e+08	1.6928e+08	1.50551e+08	1.40193e+08	1.24867e+08	1.43464e+08	1.47139e+08	1.80303e+08	1.50223e+08	1.82129e+08	1.74447e+08	1.34408e+08
G3V9M3	RCG28460 OS=Rattus norvegicus OX=10116 GN=Wdr47 PE=1 SV=1	8.35265e+07	7.73389e+07	9.4657e+07	8.93589e+07	9.10496e+07	7.99682e+07	1.08185e+08	92840206	1.05932e+08	9.60679e+07	1.04519e+08	7.80556e+07	7.2486e+07	8.36361e+07	8.69485e+07
F1M7N2	Ectonucleoside triphosphate diphosphohydrolase 2 OS=Rattus norvegicus OX=10116 GN=Entpd2 PE=1 SV=1	2.48731e+08	2.98562e+08	2.28772e+08	2.82643e+08	2.76343e+08	2.61916e+08	2.78875e+08	2.51111e+08	1.61577e+08	3.69916e+08	2.39313e+08	2.06591e+08	2.17016e+08	2.87993e+08	2.63782e+08
O70196	Prolyl endopeptidase OS=Rattus norvegicus OX=10116 GN=Prep PE=1 SV=1	1.10277e+08	1.08247e+08	8.67384e+07	9.07823e+07	7.97479e+07	8.64692e+07	8.62401e+07	7.36216e+07	9.14387e+07	1.19899e+08	9.70092e+07	1.30024e+08	9.89682e+07	4.08938e+07	7.73835e+07
P23965	Enoyl-CoA delta isomerase 1, mitochondrial OS=Rattus norvegicus OX=10116 GN=Eci1 PE=1 SV=1	2.43964e+08	3.08813e+08	2.5729e+08	2.98394e+08	3.20218e+08	3.26272e+08	2.72284e+08	3.37011e+08	2.61159e+08	3.05384e+08	2.93434e+08	3.11296e+08	2.37635e+08	3.23724e+08	2.98289e+08
B0BNJ4	ETHE1, persulfide dioxygenase OS=Rattus norvegicus OX=10116 GN=Ethe1 PE=1 SV=1	1.4147e+08	1.37848e+08	1.31135e+08	1.39207e+08	1.29485e+08	9.4982e+07	1.41597e+08	135102230	1.024e+08	1.43168e+08	1.53093e+08	1.12856e+08	1.39465e+08	1.38718e+08	1.1957e+08
P0C5X8	Protein tweety homolog 1 OS=Rattus norvegicus OX=10116 GN=Ttyh1 PE=1 SV=1	4.61789e+08	4.8744e+08	4.96901e+08	4.58389e+08	4.96976e+08	5.35493e+08	4.42283e+08	440375891	4.07817e+08	5.32029e+08	5.07286e+08	5.23279e+08	5.03329e+08	4.57359e+08	4.43924e+08
Q66HR2	Microtubule-associated protein RP/EB family member 1 OS=Rattus norvegicus OX=10116 GN=Mapre1 PE=1 SV=3	1.50504e+08	1.332e+08	1.67753e+08	2.09979e+08	2.21921e+08	2.29459e+08	1.664e+08	1.36067e+08	1.76464e+08	2.17258e+08	2.01999e+08	2.35739e+08	1.445e+08	1.84518e+08	1.65148e+08
P0DMW0	Heat shock 70 kDa protein 1A OS=Rattus norvegicus OX=10116 GN=Hspa1a PE=2 SV=1	2.98737e+07	2.50971e+07	2.57759e+07	3.20629e+07	1.74328e+07	2.7655e+07	4.383e+07	3.52705e+07	1.9337e+07	3.60027e+07	2.1161e+07	2.94633e+07	3.08669e+07	2.43453e+07	2.82557e+07
P50408	V-type proton ATPase subunit F OS=Rattus norvegicus OX=10116 GN=Atp6v1f PE=1 SV=1	5.41897e+08	5.59932e+08	6.0862e+08	5.52309e+08	5.49227e+08	5.02898e+08	5.5839e+08	5.47917e+08	5.67241e+08	5.92762e+08	5.62648e+08	5.89495e+08	5.77191e+08	5.64926e+08	5.90778e+08
O88794	Pyridoxine-5'-phosphate oxidase OS=Rattus norvegicus OX=10116 GN=Pnpo PE=1 SV=1	3.12144e+08	2.10756e+08	2.56476e+08	3.13265e+08	2.96187e+08	2.93702e+08	2.41878e+08	2.58873e+08	2.664e+08	3.35941e+08	3.06696e+08	2.76916e+08	3.03817e+08	2.93833e+08	2.39965e+08
P24368	Peptidyl-prolyl cis-trans isomerase B OS=Rattus norvegicus OX=10116 GN=Ppib PE=1 SV=3	5.70785e+08	5.67997e+08	5.90667e+08	5.97432e+08	5.84898e+08	6.00807e+08	5.31204e+08	598015858	5.46415e+08	5.47357e+08	5.45661e+08	5.61351e+08	5.73442e+08	5.17692e+08	5.18691e+08
Q5U1Z0	Rab3 GTPase-activating protein non-catalytic subunit OS=Rattus norvegicus OX=10116 GN=Rab3gap2 PE=1 SV=2	1.11261e+07	1.11819e+07	1.16546e+07	1.03522e+07	9.26634e+06	1.05395e+07	1.2175e+07	10087820	9.16065e+06	1.20365e+07	1.23112e+07	1.31726e+07	1.098e+07	9.308e+06	1.12202e+07
B0BNL2	Peptidyl-prolyl cis-trans isomerase OS=Rattus norvegicus OX=10116 GN=Pin1 PE=1 SV=1	3.84185e+08	3.81954e+08	3.34634e+08	3.14094e+08	3.09746e+08	3.20615e+08	3.70313e+08	364398805	4.04362e+08	3.14145e+08	3.42155e+08	3.62191e+08	3.26514e+08	3.52258e+08	2.53354e+08
Q9WUD9	Proto-oncogene tyrosine-protein kinase Src OS=Rattus norvegicus OX=10116 GN=Src PE=1 SV=4	9.49474e+07	9.96709e+07	1.24461e+08	1.15483e+08	1.04709e+08	9.69976e+07	9.23901e+07	1.06336e+08	1.1341e+08	1.11443e+08	1.0045e+08	1.08247e+08	1.05518e+08	1.16345e+08	9.61545e+07
O35867	Neurabin-1 OS=Rattus norvegicus OX=10116 GN=Ppp1r9a PE=1 SV=1	1.29814e+08	1.22311e+08	1.25457e+08	1.24607e+08	1.12516e+08	1.22048e+08	1.17911e+08	1.20681e+08	1.70413e+08	1.10081e+08	1.0694e+08	1.067e+08	1.27976e+08	1.29059e+08	1.15856e+08
Q68FT7	Phenylalanyl-tRNA synthetase subunit beta OS=Rattus norvegicus OX=10116 GN=Farsb PE=1 SV=1	1.63912e+08	1.742e+08	1.75415e+08	1.62714e+08	1.64241e+08	1.71577e+08	1.68631e+08	149845023	1.55422e+08	1.65033e+08	1.68329e+08	1.68625e+08	1.78058e+08	1.61812e+08	1.83704e+08
F7FHF7	Mitofusin-2 OS=Rattus norvegicus OX=10116 GN=LOC100911485 PE=1 SV=1	2.2282e+08	2.62655e+08	2.7984e+08	2.47702e+08	2.18313e+08	1.76206e+08	2.4324e+08	241664696	2.27121e+08	2.60358e+08	2.42432e+08	2.43897e+08	2.68172e+08	2.40544e+08	2.44583e+08
P23711	Heme oxygenase 2 OS=Rattus norvegicus OX=10116 GN=Hmox2 PE=1 SV=1	1.06848e+08	1.10325e+08	9.8506e+07	1.12299e+08	1.0781e+08	1.12044e+08	1.06834e+08	1.15731e+08	1.1327e+08	1.14633e+08	1.41793e+08	1.52843e+08	1.24444e+08	1.41311e+08	1.41465e+08
B0K020	CDGSH iron-sulfur domain-containing protein 1 OS=Rattus norvegicus OX=10116 GN=Cisd1 PE=3 SV=1	1.64926e+09	1.65766e+09	1.80975e+09	1.5906e+09	1.59708e+09	1.58424e+09	1.62819e+09	1696706948	1.69051e+09	1.49247e+09	1.51276e+09	1.51782e+09	1.67606e+09	1.58046e+09	1.78414e+09
P84087	Complexin-2 OS=Rattus norvegicus OX=10116 GN=Cplx2 PE=1 SV=1	5.8998e+08	5.16841e+08	5.58635e+08	5.35101e+08	5.13142e+08	5.23208e+08	5.01369e+08	449806520	8.49566e+08	4.6192e+08	4.72057e+08	4.63608e+08	4.99847e+08	4.85328e+08	4.9326e+08
F1M8H6	Phosphatidylinositol 4-phosphate 5-kinase type-1 gamma OS=Rattus norvegicus OX=10116 GN=Pip5k1c PE=1 SV=1	9.95565e+07	1.09379e+08	1.20347e+08	1.2694e+08	1.11035e+08	9.6496e+07	1.08675e+08	114023721	1.66527e+08	1.01999e+08	1.08519e+08	1.03467e+08	1.34606e+08	1.37986e+08	1.3165e+08
A0A0G2K657	Opioid-binding protein/cell adhesion molecule OS=Rattus norvegicus OX=10116 GN=Opcml PE=4 SV=1	3.15393e+08	3.08699e+08	3.23437e+08	3.04162e+08	3.14568e+08	3.29494e+08	3.44464e+08	277849858	3.80264e+08	3.16357e+08	3.80575e+08	3.34418e+08	3.60425e+08	3.38174e+08	3.26809e+08
F1M1D5	Tubulin folding cofactor D OS=Rattus norvegicus OX=10116 GN=Tbcd PE=1 SV=3	1.29761e+08	1.54424e+08	1.63716e+08	1.22581e+08	1.428e+08	1.26661e+08	1.23243e+08	1.29366e+08	1.19297e+08	1.63021e+08	1.53383e+08	1.32662e+08	1.45622e+08	1.47768e+08	1.51378e+08
A0A0G2K658	Carbonyl reductase [NADPH] 1-like OS=Rattus norvegicus OX=10116 GN=LOC102556347 PE=1 SV=1
P81795	Eukaryotic translation initiation factor 2 subunit 3, X-linked OS=Rattus norvegicus OX=10116 GN=Eif2s3 PE=1 SV=2	2.48631e+08	2.56674e+08	2.8432e+08	2.57356e+08	2.43752e+08	2.4785e+08	2.48429e+08	2.62373e+08	2.51874e+08	2.31713e+08	2.5425e+08	2.15313e+08	2.77201e+08	2.41714e+08	2.11247e+08
Q9QYU2	Elongation factor Ts, mitochondrial OS=Rattus norvegicus OX=10116 GN=Tsfm PE=2 SV=1	6.69026e+07	7.73542e+07	7.06704e+07	7.2186e+07	7.4998e+07	5.78467e+07	8.18053e+07	6.3452e+07	5.23871e+07	7.20673e+07	7.30865e+07	7.03178e+07	6.43272e+07	6.72768e+07	7.53278e+07
Q5I0D5	Phospholysine phosphohistidine inorganic pyrophosphate phosphatase OS=Rattus norvegicus OX=10116 GN=Lhpp PE=2 SV=1	1.04408e+08	1.02679e+08	8.66157e+07	7.92525e+07	9.29091e+07	8.97572e+07	1.04033e+08	8.44715e+07	9.27334e+07	1.13438e+08	1.30128e+08	1.02798e+08	1.06606e+08	9.15133e+07	9.59762e+07
Q5XIA5	Coenzyme A synthase OS=Rattus norvegicus OX=10116 GN=Coasy PE=1 SV=1	5.46043e+07	5.41609e+07	4.96822e+07	4.53036e+07	4.74569e+07	4.80047e+07	5.90261e+07	4.70486e+07	5.62478e+07	4.98604e+07	4.93334e+07	5.17962e+07	5.00879e+07	4.94892e+07	4.4317e+07
Q496Z0	Elongator complex protein 2 OS=Rattus norvegicus OX=10116 GN=Elp2 PE=2 SV=1	1.15205e+08	1.11948e+08	1.10262e+08	1.13515e+08	1.14665e+08	9.71393e+07	1.05681e+08	98083681	8.9202e+07	1.01123e+08	1.081e+08	9.75836e+07	1.12216e+08	1.04865e+08	1.30122e+08
Q9JMJ4	Pre-mRNA-processing factor 19 OS=Rattus norvegicus OX=10116 GN=Prpf19 PE=1 SV=2	1.11636e+08	1.19158e+08	1.22819e+08	1.26748e+08	1.09977e+08	1.2034e+08	1.19358e+08	1.20764e+08	1.11495e+08	1.29271e+08	1.1565e+08	1.29623e+08	1.18601e+08	1.14339e+08	1.28217e+08
P63100	Calcineurin subunit B type 1 OS=Rattus norvegicus OX=10116 GN=Ppp3r1 PE=1 SV=2	3.03847e+08	3.28525e+08	2.95412e+08	3.05455e+08	3.85453e+08	4.30876e+08	2.99258e+08	2.65571e+08	4.74696e+08	5.22733e+08	4.24608e+08	4.09692e+08	3.37748e+08	3.49979e+08	3.35484e+08
Q07205	Eukaryotic translation initiation factor 5 OS=Rattus norvegicus OX=10116 GN=Eif5 PE=1 SV=1	2.11582e+08	2.26839e+08	2.0953e+08	2.22448e+08	2.06478e+08	2.45676e+08	2.34052e+08	2.26487e+08	1.56687e+08	2.38781e+08	2.25602e+08	2.32455e+08	2.24296e+08	2.14946e+08	2.39783e+08
Q923Z2	Tropomyosin 1, alpha, isoform CRA_a OS=Rattus norvegicus OX=10116 GN=Tpm1 PE=1 SV=1	7.14009e+06	8.82173e+06	1.11323e+07	1.56106e+07	1.18738e+08	1.14272e+08	5.14332e+06	195404176	6.64394e+07	6.50637e+06	7.67027e+06	1.32977e+07	5.96215e+06	8.99119e+06	1.38091e+07
A0A0G2K121	Unc-119 lipid-binding chaperone B OS=Rattus norvegicus OX=10116 GN=Mlec PE=1 SV=1	1.13236e+08	1.40852e+08	1.35285e+08	1.40775e+08	1.17837e+08	1.10631e+08	1.35777e+08	1.24268e+08	1.05478e+08	1.14378e+08	9.68789e+07	1.10049e+08	1.01162e+08	1.1406e+08	1.12447e+08
Q6QI16	LRRGT00192 OS=Rattus norvegicus OX=10116 GN=Rtraf PE=1 SV=1	1.05933e+08	1.18139e+08	1.09199e+08	1.07769e+08	1.03474e+08	7.48476e+07	1.21572e+08	9.97995e+07	1.18041e+08	1.17694e+08	1.20308e+08	1.17051e+08	1.19757e+08	1.17907e+08	1.21006e+08
G3V8G2	Proteasome (Prosome, macropain) 26S subunit, non-ATPase, 5 (Predicted), isoform CRA_a OS=Rattus norvegicus OX=10116 GN=Psmd5 PE=1 SV=1	1.61423e+08	1.40235e+08	1.38602e+08	1.53785e+08	1.55863e+08	1.51514e+08	1.46222e+08	1.53348e+08	1.04538e+08	1.78695e+08	1.46783e+08	1.55441e+08	1.56752e+08	1.55068e+08	1.60661e+08
F1M5M9	SLIT-ROBO Rho GTPase-activating protein 3 OS=Rattus norvegicus OX=10116 GN=Srgap3 PE=1 SV=2	6.83241e+07	5.17364e+07	4.96471e+07	4.94431e+07	6.08757e+07	3.97523e+07	5.23912e+07	4.71485e+07	5.72371e+07	4.54423e+07	4.12607e+07	5.4872e+07	6.35056e+07	8.53325e+07	6.67641e+07
A0A0G2JTS3	Vacuolar protein sorting-associated protein 29 OS=Rattus norvegicus OX=10116 GN=Vps29 PE=1 SV=1	5.60156e+06	3.96668e+06	6.07173e+06	4.51438e+06	4.78777e+06	5.34962e+06	6.72115e+06	6226720	7.46381e+06	6.81816e+06	4.67753e+06	3.95758e+06	6.02932e+06	5.56268e+06	5.54923e+06
D3ZIP8	Uncharacterized protein OS=Rattus norvegicus OX=10116 PE=4 SV=2	1.22038e+08	1.38978e+08	1.39821e+08	1.4343e+08	1.3925e+08	1.2894e+08	1.20552e+08	1.37816e+08	1.19605e+08	1.12208e+08	1.28331e+08	1.4197e+08	1.38606e+08	1.20827e+08	1.1496e+08
Q6P9V1	Tetraspanin OS=Rattus norvegicus OX=10116 GN=Cd81 PE=1 SV=1	6.19402e+08	6.97397e+08	7.00024e+08	6.59611e+08	6.58838e+08	6.95105e+08	6.46215e+08	6.96124e+08	5.37236e+08	6.52202e+08	7.39426e+08	7.18295e+08	6.52679e+08	6.68704e+08	6.80545e+08
A0A0G2JTT2	Phosphatidylinositol binding clathrin assembly protein, isoform CRA_a OS=Rattus norvegicus OX=10116 GN=Picalm PE=1 SV=1					3.21575e+06				4.71495e+06	3.87012e+06		726321
O88917	Adhesion G protein-coupled receptor L1 OS=Rattus norvegicus OX=10116 GN=Adgrl1 PE=1 SV=1	7.18192e+07	7.11285e+07	9.38891e+07	5.96319e+07	8.43434e+07	7.26148e+07	6.40395e+07	5.49275e+07	9.02459e+07	9.10437e+07	4.27708e+07	7.76738e+07	7.47941e+07	6.40571e+07	6.95713e+07
P62890	60S ribosomal protein L30 OS=Rattus norvegicus OX=10116 GN=Rpl30 PE=3 SV=2	3.73653e+08	3.86484e+08	4.24001e+08	3.83884e+08	3.8309e+08	3.4306e+08	3.81383e+08	4.03454e+08	3.54466e+08	4.12797e+08	3.8544e+08	3.80312e+08	3.96297e+08	3.74986e+08	4.23203e+08
F8WG91	ADP-ribosylation factor-like protein 3 OS=Rattus norvegicus OX=10116 GN=Arl3 PE=1 SV=2	2.35164e+08	2.50296e+08	2.23263e+08	2.48524e+08	2.41774e+08	2.27692e+08	2.56181e+08	2.30866e+08	2.62503e+08	2.67699e+08	2.0379e+08	1.9308e+08	2.76427e+08	2.36499e+08	2.33931e+08
Q08602	Geranylgeranyl transferase type-2 subunit alpha OS=Rattus norvegicus OX=10116 GN=Rabggta PE=1 SV=1	1.38669e+08	1.47816e+08	1.66533e+08	1.52105e+08	1.44657e+08	9.64835e+07	1.39643e+08	1.54435e+08	1.55357e+08	1.48515e+08	1.43913e+08	1.33891e+08	1.47573e+08	1.45439e+08	1.40603e+08
Q02589	[Protein ADP-ribosylarginine] hydrolase OS=Rattus norvegicus OX=10116 GN=Adprh PE=1 SV=2	1.39372e+08	1.46985e+08	1.60023e+08	1.65115e+08	1.52007e+08	1.39515e+08	1.56541e+08	1.51908e+08	1.54504e+08	2.05637e+08	1.89522e+08	1.84724e+08	1.58993e+08	1.58156e+08	1.59251e+08
G3V8W2	Phosphatidate cytidylyltransferase OS=Rattus norvegicus OX=10116 GN=Cds2 PE=1 SV=1	1.90223e+08	1.967e+08	1.73619e+08	1.73227e+08	2.11446e+08	1.78578e+08	2.28307e+08	170097955	2.02588e+08	2.50341e+08	2.23479e+08	2.01308e+08	1.69466e+08	1.79614e+08	1.96248e+08
P51146	Ras-related protein Rab-4B OS=Rattus norvegicus OX=10116 GN=Rab4b PE=2 SV=1	5.77471e+07	6.00683e+07	6.83842e+07	6.44562e+07	6.06597e+07	5.41728e+07	5.82349e+07	6.23152e+07	6.55531e+07	7.01881e+07	4.95229e+07	7.21934e+07	6.58462e+07	5.52766e+07	5.91062e+07
Q641Y0	Dolichyl-diphosphooligosaccharide--protein glycosyltransferase 48 kDa subunit OS=Rattus norvegicus OX=10116 GN=Ddost PE=2 SV=1	9.09982e+07	9.79093e+07	9.99343e+07	1.03894e+08	9.80444e+07	8.48581e+07	1.04416e+08	9.61752e+07	8.81769e+07	1.05455e+08	1.18795e+08	1.3253e+08	9.843e+07	9.39008e+07	1.04916e+08
M0R9L2	Ciliary neurotrophic factor receptor subunit alpha OS=Rattus norvegicus OX=10116 GN=Cntfr PE=4 SV=1	6.1431e+06	6.77635e+06	4.91433e+06	5.52766e+06	5.51668e+06	6.16042e+06	2.41829e+06	5054986	6.52543e+06	5.1277e+06	7.62571e+06		6.17273e+06		5.41804e+06
F1LX08	Sodium channel protein OS=Rattus norvegicus OX=10116 GN=Scn3a PE=1 SV=3	1.48246e+06	1.51634e+06	1.49791e+06	994382	788492	786549	1.29846e+06	1.27696e+06		921533	905001		1.16118e+06	1.00888e+06	838209
O70257	Syntaxin-7 OS=Rattus norvegicus OX=10116 GN=Stx7 PE=1 SV=4	8.24564e+07	8.92516e+07	7.72137e+07	8.40101e+07	1.03599e+08	1.14009e+08	8.10811e+07	72321817	7.41789e+07	1.30274e+08	1.23033e+08	1.11069e+08	8.70649e+07	7.98591e+07	8.87849e+07
B1H2A2	Fibronectin type III and SPRY domain-containing protein 1 OS=Rattus norvegicus OX=10116 GN=Fsd1 PE=1 SV=1	1.47344e+08	1.49314e+08	1.5115e+08	1.49866e+08	1.43685e+08	1.37103e+08	1.56422e+08	1.37591e+08	1.38324e+08	1.34404e+08	1.42122e+08	1.39832e+08	1.54751e+08	1.49477e+08	1.45308e+08
Q5U362	Annexin OS=Rattus norvegicus OX=10116 GN=Anxa4 PE=1 SV=1	7.91731e+07	6.38853e+07	7.71684e+07	9.42068e+07	8.9935e+07	1.15413e+08	7.71e+07	136246362	7.19007e+07	4.06307e+07	4.51318e+07	8.3005e+07	7.375e+07	1.08622e+08	8.82491e+07
D3ZJX5	RCG54610, isoform CRA_a OS=Rattus norvegicus OX=10116 GN=Timm50 PE=1 SV=2	1.01997e+08	1.08204e+08	9.6813e+07	8.53841e+07	9.35161e+07	1.01775e+08	9.48588e+07	96641783	9.01017e+07	1.14244e+08	1.19496e+08	1.12215e+08	1.08038e+08	8.95515e+07	9.13075e+07
G3V964	Neurotrimin OS=Rattus norvegicus OX=10116 GN=Ntm PE=4 SV=2	4.43965e+08	4.58829e+08	4.79365e+08	4.13972e+08	5.32627e+08	6.09066e+08	4.73166e+08	420265220	4.62299e+08	5.88869e+08	6.12821e+08	5.28215e+08	4.58001e+08	4.4951e+08	4.83918e+08
A0A0G2JY03	Uncharacterized protein OS=Rattus norvegicus OX=10116 PE=1 SV=1	1.10781e+08	1.20851e+08	1.09474e+08	9.23761e+07	9.32699e+07	9.10978e+07	1.09512e+08	103656316	1.18524e+08	1.21673e+08	1.18538e+08	1.11702e+08	9.86394e+07	1.00487e+08	1.07899e+08
P63041	Complexin-1 OS=Rattus norvegicus OX=10116 GN=Cplx1 PE=1 SV=1	4.32465e+08	4.14354e+08	4.66828e+08	4.35387e+08	4.21127e+08	4.01824e+08	4.03929e+08	4.2424e+08	5.58535e+08	2.83343e+08	3.99072e+08	4.07506e+08	4.09634e+08	4.28501e+08	4.40727e+08
P24473	Glutathione S-transferase kappa 1 OS=Rattus norvegicus OX=10116 GN=Gstk1 PE=1 SV=3	2.95746e+08	3.12344e+08	3.60625e+08	3.96102e+08	2.58047e+08	2.65448e+08	3.50575e+08	3.17159e+08	2.59261e+08	3.01852e+08	2.47348e+08	3.1519e+08	2.92858e+08	2.91098e+08	3.0829e+08
P07632	Superoxide dismutase [Cu-Zn] OS=Rattus norvegicus OX=10116 GN=Sod1 PE=1 SV=2	1.27163e+09	1.18211e+09	1.27434e+09	1.20994e+09	1.11925e+09	1.41625e+09	1.17053e+09	1.19963e+09	9.85635e+08	1.16852e+09	1.04916e+09	1.17301e+09	1.19091e+09	1.32633e+09	1.20885e+09
Q7M0F1	Glutathione transferase 3 (Fragments) OS=Rattus norvegicus OX=10116 PE=1 SV=1	2.35363e+08	2.70892e+08	2.08536e+08	1.69439e+08	2.09626e+08	2.26093e+08	2.31846e+08	1.64622e+08	1.98387e+08	2.50146e+08	2.28515e+08	2.11158e+08	1.84882e+08	2.25312e+08	2.03551e+08
Q6PDW1	40S ribosomal protein S12 OS=Rattus norvegicus OX=10116 GN=Rps12 PE=1 SV=1	3.977e+08	4.04292e+08	4.07277e+08	4.23511e+08	3.88905e+08	4.30034e+08	3.72828e+08	413063779	3.6561e+08	4.25295e+08	4.00023e+08	3.92212e+08	3.96631e+08	3.84588e+08	4.13348e+08
P60203	Myelin proteolipid protein OS=Rattus norvegicus OX=10116 GN=Plp1 PE=1 SV=2	3.95181e+10	4.21318e+10	3.9996e+10	4.89913e+10	4.18133e+10	4.95526e+10	3.90268e+10	4.70861e+10	4.02386e+10	2.83661e+10	3.5538e+10	5.14241e+10	4.15649e+10	5.05199e+10	4.15743e+10
P07825	Synaptophysin OS=Rattus norvegicus OX=10116 GN=Syp PE=1 SV=1	1.99742e+09	2.12244e+09	2.06439e+09	1.91053e+09	2.11818e+09	1.61141e+09	1.90764e+09	1.84962e+09	2.30731e+09	2.21836e+09	1.97109e+09	1.8529e+09	2.23273e+09	2.14625e+09	2.26528e+09
D3ZX42	G protein-coupled receptor 21 (Predicted), isoform CRA_a OS=Rattus norvegicus OX=10116 GN=Rabgap1 PE=1 SV=1	8.15174e+07	7.79401e+07	8.26921e+07	8.58045e+07	7.46442e+07	6.2943e+07	5.94449e+07	7.68312e+07	8.37203e+07	6.33032e+07	6.6474e+07	6.02801e+07	7.79088e+07	6.59767e+07	7.24548e+07
P36506	Dual specificity mitogen-activated protein kinase kinase 2 OS=Rattus norvegicus OX=10116 GN=Map2k2 PE=1 SV=1	7.62045e+07	7.76235e+07	7.94928e+07	6.76914e+07	8.6837e+07	7.75808e+07	4.94879e+07	5.18451e+07	8.14084e+07	9.26266e+07	9.07168e+07	7.3414e+07	8.59414e+07	8.72445e+07	7.1079e+07
A0A140TAF0	RCG62531, isoform CRA_g OS=Rattus norvegicus OX=10116 GN=Tpm3 PE=1 SV=1	1.39085e+08	1.40312e+08	1.20055e+08	1.16927e+08	1.37543e+08	1.21092e+08	1.63837e+08	122374844	1.59608e+08	1.46687e+08	1.49027e+08	1.34273e+08	1.57578e+08	1.29713e+08	1.27759e+08
B0BMS8	Myl9 protein OS=Rattus norvegicus OX=10116 GN=Myl9 PE=1 SV=1	512819	1.02881e+06	1.02053e+06	2.05107e+06	1.8375e+07	1.75788e+07		22481432	2.08626e+07	421855			1.3644e+06	620605
P04166	Cytochrome b5 type B OS=Rattus norvegicus OX=10116 GN=Cyb5b PE=1 SV=2	5.00762e+08	5.27059e+08	4.77045e+08	5.53486e+08	5.27446e+08	3.24183e+08	2.30304e+08	454817331	4.75821e+08	5.55688e+08	2.17088e+08	5.21687e+08	5.34768e+08	5.22285e+08	5.56687e+08
Q99MZ8	LIM and SH3 domain protein 1 OS=Rattus norvegicus OX=10116 GN=Lasp1 PE=1 SV=1	4.60853e+08	5.05828e+08	4.73982e+08	4.77592e+08	4.77255e+08	4.6533e+08	4.37403e+08	476124807	4.73869e+08	4.52259e+08	4.71301e+08	4.22817e+08	4.90416e+08	4.36896e+08	4.65998e+08
B1WC26	N-acetylneuraminate synthase OS=Rattus norvegicus OX=10116 GN=Nans PE=1 SV=1	1.31559e+08	1.30864e+08	1.2328e+08	1.26135e+08	1.18874e+08	1.46675e+08	1.11296e+08	129006142	1.2871e+08	1.54196e+08	1.48632e+08	1.40981e+08	8.18013e+07	1.18511e+08	1.19053e+08
Q6AYG5	Ethylmalonyl-CoA decarboxylase OS=Rattus norvegicus OX=10116 GN=Echdc1 PE=1 SV=1	2.49729e+08	2.42563e+08	2.37146e+08	2.10534e+08	1.91868e+08	2.23549e+08	2.31214e+08	1.89434e+08	1.7628e+08	2.19081e+08	2.20752e+08	1.97118e+08	2.28566e+08	2.19939e+08	2.46703e+08
P60123	RuvB-like 1 OS=Rattus norvegicus OX=10116 GN=Ruvbl1 PE=1 SV=1	1.51669e+08	1.52727e+08	1.42886e+08	1.47151e+08	1.31039e+08	1.33811e+08	1.57463e+08	1.48458e+08	1.17198e+08	1.52458e+08	1.41027e+08	1.39301e+08	1.46529e+08	1.45074e+08	1.22334e+08
F1LT58	Importin subunit alpha OS=Rattus norvegicus OX=10116 GN=Kpna6 PE=1 SV=3	9.83297e+06	6.99228e+06	1.75372e+07	1.7984e+07	6.49117e+06	7.93256e+06		1.26232e+07	2.53177e+06	1.21972e+07	8.60438e+06	8.43513e+06	9.11293e+06		1.08584e+07
P21670	Proteasome subunit alpha type-4 OS=Rattus norvegicus OX=10116 GN=Psma4 PE=1 SV=1	4.94116e+08	4.78877e+08	5.33636e+08	5.49443e+08	5.18141e+08	5.07128e+08	4.95397e+08	4.7601e+08	4.60863e+08	5.46895e+08	5.21673e+08	5.24525e+08	5.27249e+08	5.15619e+08	5.6181e+08
D4A4D5	Similar to 60S acidic ribosomal protein P2 OS=Rattus norvegicus OX=10116 GN=LOC498555 PE=3 SV=1	4.77126e+08	4.60446e+08	4.5164e+08	4.45443e+08	4.77649e+08	5.11896e+08	4.42949e+08	472880554	4.05902e+08	5.35236e+08	4.70411e+08	4.41058e+08	4.52703e+08	4.72559e+08	4.76798e+08
P62804	Histone H4 OS=Rattus norvegicus OX=10116 GN=Hist1h4b PE=1 SV=2	6.01907e+09	5.71604e+09	5.98184e+09	5.84883e+09	5.94306e+09	6.01381e+09	5.47412e+09	6.57868e+09	5.4609e+09	5.57799e+09	5.15446e+09	5.78167e+09	5.50141e+09	5.60359e+09	5.63109e+09
B5DFC8	Eukaryotic translation initiation factor 3 subunit C OS=Rattus norvegicus OX=10116 GN=Eif3c PE=1 SV=1	1.2393e+08	1.36077e+08	1.46415e+08	1.41805e+08	1.45707e+08	1.3247e+08	1.2159e+08	1.31047e+08	8.95949e+07	1.41889e+08	1.21437e+08	1.4337e+08	1.43627e+08	1.24887e+08	1.50793e+08
G3V8R2	Neurocan core protein OS=Rattus norvegicus OX=10116 GN=Ncan PE=1 SV=1	7.44148e+07	5.2112e+07	6.19936e+07	4.58185e+07	7.94521e+07	5.06891e+07	1.13858e+08	8.63341e+07	1.98547e+08	3.40285e+07	4.81692e+07	4.82105e+07	6.14228e+07	4.30032e+07	1.07573e+08
A0A0G2K6T9	Protocadherin 1 OS=Rattus norvegicus OX=10116 GN=Pcdh1 PE=1 SV=1	4.37065e+07	4.03327e+07	3.80046e+07	4.32486e+07	3.57302e+07	3.43159e+07	4.52916e+07	40013000	7.24959e+07	4.13333e+07	3.11658e+07	7.05767e+07	4.43296e+07	4.10588e+07	4.31627e+07
M0R5T4	RAS-related C3 botulinum substrate 3 OS=Rattus norvegicus OX=10116 GN=Rac3 PE=4 SV=2	1.0924e+08	1.01619e+08	6.92826e+07	7.34123e+07	6.68825e+07	6.23672e+07	6.83511e+07	7.13319e+07	7.94056e+07	7.57507e+07	6.82844e+07	7.07763e+07	7.16702e+07	8.00832e+07	8.30781e+07
B0K031	60S ribosomal protein L7 OS=Rattus norvegicus OX=10116 GN=Rpl7 PE=1 SV=1	6.27124e+08	6.40858e+08	6.81427e+08	6.12872e+08	6.09134e+08	6.02399e+08	6.56727e+08	6.33423e+08	5.61596e+08	6.69825e+08	6.09435e+08	6.21053e+08	6.13945e+08	5.97713e+08	6.42223e+08
Q5M9F7	ARP10 actin-related protein 10 homolog (S. cerevisiae) OS=Rattus norvegicus OX=10116 GN=Actr10 PE=1 SV=1	8.56048e+07	7.41755e+07	7.59098e+07	6.70849e+07	6.9733e+07	9.74622e+07	7.93025e+07	7.8822e+07	9.05193e+07	1.05157e+08	8.94576e+07	9.64703e+07	9.50689e+07	8.65161e+07	8.76868e+07
P62982	Ubiquitin-40S ribosomal protein S27a OS=Rattus norvegicus OX=10116 GN=Rps27a PE=1 SV=2	1.09043e+10	1.12596e+10	1.07989e+10	1.07883e+10	1.11993e+10	8.96229e+09	1.07342e+10	1.05831e+10	1.11854e+10	1.063e+10	1.00496e+10	9.51907e+09	1.1143e+10	1.04325e+10	1.09572e+10
Q4KM45	UPF0687 protein C20orf27 homolog OS=Rattus norvegicus OX=10116 PE=2 SV=1	1.90547e+08	2.20667e+08	2.22677e+08	1.97285e+08	2.23414e+08	2.02338e+08	2.07248e+08	1.91891e+08	1.89869e+08	2.46078e+08	2.23509e+08	2.14387e+08	2.21167e+08	2.05814e+08	2.12946e+08
P97532	3-mercaptopyruvate sulfurtransferase OS=Rattus norvegicus OX=10116 GN=Mpst PE=1 SV=3	1.53651e+08	1.59883e+08	1.40257e+08	1.56227e+08	1.47369e+08	1.4719e+08	1.5794e+08	159830251	1.4475e+08	1.69408e+08	1.61329e+08	1.66286e+08	1.42156e+08	1.51601e+08	1.46597e+08
B2GUY4	Dematin actin-binding protein OS=Rattus norvegicus OX=10116 GN=Dmtn PE=1 SV=1	1.86831e+08	1.6463e+08	1.61015e+08	1.77953e+08	2.14972e+08	1.69235e+08	1.78256e+08	1.82004e+08	2.09205e+08	2.10083e+08	1.94597e+08	1.47841e+08	2.01553e+08	1.68465e+08	1.61237e+08
B1WC73	ADP-ribosylation factor-like 6 (Predicted), isoform CRA_a OS=Rattus norvegicus OX=10116 GN=Arl6 PE=1 SV=1	1.4437e+08	1.42727e+08	1.37539e+08	1.27442e+08	1.30562e+08	1.21533e+08	1.68366e+08	161986875	1.1654e+08	1.602e+08	1.38754e+08	1.50616e+08	1.38377e+08	1.51772e+08	1.63039e+08
Q9JM53	Apoptosis-inducing factor 1, mitochondrial OS=Rattus norvegicus OX=10116 GN=Aifm1 PE=1 SV=1	2.33432e+08	2.32253e+08	2.35286e+08	2.31882e+08	1.94806e+08	2.01546e+08	2.25168e+08	2.38362e+08	2.26431e+08	1.96319e+08	1.79527e+08	2.04858e+08	2.24745e+08	1.97364e+08	2.08182e+08
Q9Z0U4	Gamma-aminobutyric acid type B receptor subunit 1 OS=Rattus norvegicus OX=10116 GN=Gabbr1 PE=1 SV=1	9.0532e+07	8.94918e+07	8.2191e+07	6.51572e+07	9.35206e+07	7.08449e+07	9.36116e+07	7.84563e+07	8.76877e+07	1.11129e+08	1.12342e+08	8.28818e+07	8.81559e+07	8.0188e+07	8.36756e+07
P18395	Cold shock domain-containing protein E1 OS=Rattus norvegicus OX=10116 GN=Csde1 PE=2 SV=1	1.67616e+08	1.64592e+08	1.40222e+08	1.50268e+08	1.5068e+08	1.53179e+08	1.42696e+08	1.41165e+08	1.5067e+08	1.63187e+08	1.71189e+08	1.64859e+08	1.46859e+08	1.70526e+08	1.66929e+08
Q80Z29	Nicotinamide phosphoribosyltransferase OS=Rattus norvegicus OX=10116 GN=Nampt PE=1 SV=1	8.55315e+07	6.71559e+07	7.9131e+07	7.63428e+07	9.63261e+07	8.84142e+07	7.92238e+07	8.6604e+07	7.74645e+07	1.04611e+08	8.23852e+07	7.94979e+07	9.21478e+07	8.77442e+07	7.71493e+07
P39052	Dynamin-2 OS=Rattus norvegicus OX=10116 GN=Dnm2 PE=1 SV=1	1.03363e+06	1.64368e+06	3.73887e+06		1.84094e+06	2.13457e+06	876676	2.32089e+06	1.38824e+07			1.90717e+06	1.52051e+06	1.82173e+06	1.76651e+06
D4A9D8	Oxysterol-binding protein OS=Rattus norvegicus OX=10116 GN=Osbp PE=1 SV=2	8.63255e+07	1.0644e+08	9.96238e+07	9.1827e+07	8.32646e+07	8.88449e+07	1.01816e+08	1.02275e+08	9.91381e+07	1.15359e+08	9.63942e+07	9.17367e+07	9.06295e+07	7.04803e+07	1.01505e+08
Q6P7Q4	Lactoylglutathione lyase OS=Rattus norvegicus OX=10116 GN=Glo1 PE=1 SV=3	1.20064e+09	1.23521e+09	1.3348e+09	1.30114e+09	1.3317e+09	1.06827e+09	1.30739e+09	1185616256	1.19808e+09	1.38004e+09	1.33574e+09	1.26102e+09	1.25078e+09	1.27097e+09	1.16491e+09
Q5XIM0	BCS1 homolog, ubiquinol-cytochrome c reductase complex chaperone OS=Rattus norvegicus OX=10116 GN=Bcs1l PE=1 SV=1	6.80561e+07	9.21382e+07	9.08959e+07	7.68927e+07	7.25359e+07	6.83699e+07	7.12055e+07	59571139	8.2647e+07	6.44403e+07	8.95371e+07	7.5897e+07	6.28236e+07	5.98277e+07	9.20492e+07
D4A3V2	NADH dehydrogenase [ubiquinone] 1 alpha subcomplex subunit 6 OS=Rattus norvegicus OX=10116 GN=Ndufa6 PE=1 SV=1	7.75743e+08	7.74829e+08	8.22368e+08	7.72866e+08	9.43153e+08	6.89597e+08	5.65524e+08	541256516	7.69678e+08	6.92749e+08	7.15135e+08	4.86797e+08	7.59306e+08	5.13318e+08	7.98583e+08
P50503	Hsc70-interacting protein OS=Rattus norvegicus OX=10116 GN=St13 PE=1 SV=1	8.41251e+08	8.80708e+08	9.40611e+08	8.19165e+08	7.40959e+08	7.68173e+08	7.94935e+08	774519672	7.45281e+08	8.4804e+08	7.60638e+08	7.76688e+08	8.52776e+08	8.16297e+08	8.75583e+08
M0R6L4	40S ribosomal protein S3a OS=Rattus norvegicus OX=10116 GN=LOC100365839 PE=3 SV=1	6.19204e+08	6.3164e+08	6.4849e+08	6.31065e+08	5.83591e+08	4.67925e+08	6.08743e+08	646555987	6.09257e+08	5.92221e+08	5.83573e+08	5.98846e+08	5.95581e+08	5.61105e+08	5.95447e+08
Q99068	Alpha-2-macroglobulin receptor-associated protein OS=Rattus norvegicus OX=10116 GN=Lrpap1 PE=1 SV=2	1.83848e+08	1.50359e+08	1.54817e+08	2.09487e+08	2.11775e+08	2.14835e+08	1.75203e+08	1.87139e+08	2.26122e+08	2.59813e+08	2.00784e+08	2.00475e+08	1.52605e+08	1.86662e+08	1.98586e+08
D3ZC56	Dystonin OS=Rattus norvegicus OX=10116 GN=Dst PE=1 SV=3	4.77669e+07	5.00033e+07	5.11769e+07	7.40052e+07	6.49994e+07	5.59634e+07	4.99689e+07	7.60003e+07	5.67872e+07	5.89301e+07	5.78321e+07	5.8447e+07	6.16249e+07	5.30111e+07	6.24583e+07
P62907	60S ribosomal protein L10a OS=Rattus norvegicus OX=10116 GN=Rpl10a PE=1 SV=2	5.97247e+08	5.65296e+08	5.52771e+08	5.97008e+08	5.42441e+08	5.47921e+08	5.61564e+08	5.69816e+08	5.1731e+08	6.22611e+08	5.84603e+08	5.84162e+08	5.76503e+08	5.37803e+08	5.84006e+08
Q5M7V3	LOC367586 protein OS=Rattus norvegicus OX=10116 GN=LOC367586 PE=2 SV=1	3.88739e+08	1.9309e+08	1.90807e+08	2.04098e+08	1.37707e+08	2.42948e+08	2.43066e+08	298184301	1.90128e+08	2.25315e+08	2.33929e+08	1.52462e+08	2.59317e+08	2.94686e+08	2.78614e+08
D4A2G9	RAN-binding protein 1 OS=Rattus norvegicus OX=10116 GN=Ranbp1 PE=1 SV=1	3.55374e+08	5.20331e+08	5.19821e+08	5.37763e+08	5.20994e+08	3.69775e+08	4.68959e+08	473822576	3.20439e+08	5.37075e+08	5.85162e+08	4.13587e+08	3.58956e+08	4.0583e+08	5.41879e+08
D4A3C2	Similar to RIKEN cDNA 6430548M08 OS=Rattus norvegicus OX=10116 GN=RGD1304884 PE=1 SV=1	2.1887e+08	2.29778e+08	2.44109e+08	2.26033e+08	2.09676e+08	1.75238e+08	1.7606e+08	181407205	2.79965e+08	1.9068e+08	2.17213e+08	2.08447e+08	2.30622e+08	2.11093e+08	2.35489e+08
B5DEH2	Erlin-2 OS=Rattus norvegicus OX=10116 GN=Erlin2 PE=1 SV=1	2.18055e+08	2.29585e+08	2.09147e+08	1.92895e+08	1.9276e+08	2.20868e+08	1.86864e+08	175898399	1.77789e+08	2.3674e+08	2.06682e+08	2.10777e+08	1.98638e+08	2.20398e+08	2.30965e+08
F1LM84	Nidogen-1 OS=Rattus norvegicus OX=10116 GN=Nid1 PE=1 SV=1	9.23986e+07	7.09273e+07	1.12975e+08	1.22072e+08	1.04909e+08	1.34856e+08	5.95454e+07	146277564	1.05772e+08	9.14897e+07	7.45254e+07	8.27987e+07	8.58591e+07	9.93817e+07	9.49944e+07
A0A0G2JXW4	Heterogeneous nuclear ribonucleoprotein C, isoform CRA_a OS=Rattus norvegicus OX=10116 GN=Hnrnpc PE=1 SV=1	5.20663e+08	5.14128e+08	5.34993e+08	5.17825e+08	5.06007e+08	4.89913e+08	5.5414e+08	500294303	5.16611e+08	5.43253e+08	5.09501e+08	4.91744e+08	5.53018e+08	5.074e+08	5.67413e+08
G3V7J2	Interferon-inducible double-stranded RNA-dependent protein kinase activator A OS=Rattus norvegicus OX=10116 GN=Prkra PE=1 SV=1	6.83366e+07	7.12832e+07	9.06645e+07	8.03873e+07	8.76678e+07	8.37072e+07	1.2995e+08	7.18955e+07	1.27037e+08	1.02094e+08	7.91916e+07	7.07779e+07	9.18298e+07	4.11665e+07	7.02266e+07
A0A0H2UI10	Meningioma expressed antigen 5 (hyaluronidase) OS=Rattus norvegicus OX=10116 GN=Oga PE=1 SV=1	1.32296e+08	1.54693e+08	9.03316e+07	1.29089e+08	1.27389e+08	1.42651e+08	1.21314e+08	1.14875e+08	1.33492e+08	1.72355e+08	1.50981e+08	1.48973e+08	1.19392e+08	1.16528e+08	1.44725e+08
Q3ZBA0	Tectonin beta-propeller repeat-containing protein 1 OS=Rattus norvegicus OX=10116 GN=Tecpr1 PE=2 SV=1	1.0343e+08	1.06592e+08	9.13003e+07	9.59911e+07	9.22382e+07	7.43566e+07	7.75979e+07	8.59983e+07	8.356e+07	8.97109e+07	8.6901e+07	6.75838e+07	8.19962e+07	7.409e+07	9.20733e+07
B5DER3	Hypertrophic agonist responsive protein B64, isoform CRA_b OS=Rattus norvegicus OX=10116 GN=Iah1 PE=2 SV=1	1.36244e+08	1.51716e+08	1.33494e+08	1.67693e+08	1.32957e+08	1.32657e+08	1.38521e+08	132170792	1.24461e+08	1.72639e+08	1.59436e+08	1.73676e+08	1.30636e+08	1.70916e+08	1.33188e+08
D3ZMY7	5'-nucleotidase, cytosolic II OS=Rattus norvegicus OX=10116 GN=Nt5c2 PE=1 SV=3	1.0889e+08	1.13973e+08	1.18084e+08	1.00922e+08	1.22428e+08	1.1108e+08	1.26386e+08	1.18044e+08	1.0431e+08	9.43044e+07	8.28959e+07	9.30582e+07	1.20649e+08	1.15268e+08	1.28638e+08
Q9WV97	Mitochondrial import inner membrane translocase subunit Tim9 OS=Rattus norvegicus OX=10116 GN=Timm9 PE=1 SV=3	2.9726e+08	3.12627e+08	3.49138e+08	3.05995e+08	3.04371e+08	2.51092e+08	2.97127e+08	303084981	2.88545e+08	2.96903e+08	2.62558e+08	2.10943e+08	3.13153e+08	2.7315e+08	3.36367e+08
B2RYW3	NADH dehydrogenase (Ubiquinone) 1 beta subcomplex, 9 OS=Rattus norvegicus OX=10116 GN=Ndufb9 PE=1 SV=1	4.68818e+08	4.87581e+08	5.38673e+08	4.79798e+08	4.94675e+08	6.55016e+08	4.58296e+08	4.79843e+08	4.55391e+08	4.90454e+08	5.68617e+08	5.61621e+08	4.62048e+08	4.59012e+08	4.78005e+08
Q8R4A1	ERO1-like protein alpha OS=Rattus norvegicus OX=10116 GN=Ero1a PE=1 SV=1	1.40757e+08	1.16211e+08	1.20529e+08	1.3224e+08	1.29397e+08	1.12868e+08	1.12528e+08	1.17678e+08	1.02261e+08	1.42775e+08	1.39335e+08	1.37505e+08	1.3391e+08	1.2825e+08	1.32824e+08
P61227	Ras-related protein Rap-2b OS=Rattus norvegicus OX=10116 GN=Rap2b PE=2 SV=1	1.33454e+08	1.38354e+08	1.24503e+08	1.24249e+08	1.17453e+08	1.20172e+08	1.38308e+08	1.32408e+08	1.64119e+08	1.34647e+08	1.21819e+08	1.21591e+08	1.36705e+08	1.22421e+08	1.37293e+08
A0A0G2JSW0	Myosin regulatory light chain 12B OS=Rattus norvegicus OX=10116 GN=Myl12b PE=4 SV=1	4.33584e+07	4.67924e+07	5.06899e+07	5.04276e+07	5.32826e+07	6.13534e+07	4.72186e+07	48291204	1.20162e+08	3.06936e+07	1.93759e+07	3.26997e+07	3.83936e+07	4.84175e+07	5.11139e+07
G3V9W0	Centrin 2 OS=Rattus norvegicus OX=10116 GN=Cetn2 PE=1 SV=1	2.04165e+08	1.73024e+08	1.72095e+08	1.95737e+08	1.93816e+08	1.97861e+08	2.00242e+08	1.60224e+08	1.59514e+08	2.45703e+08	2.07893e+08	1.83467e+08	1.78948e+08	1.86551e+08	1.5194e+08
F1M0Z1	Triple functional domain protein OS=Rattus norvegicus OX=10116 GN=Trio PE=1 SV=4	1.16916e+08	9.3435e+07	9.81077e+07	9.22204e+07	9.10515e+07	9.79354e+07	1.13059e+08	1.13108e+08	1.24804e+08	9.02427e+07	9.32127e+07	1.0387e+08	1.0731e+08	1.04686e+08	1.05819e+08
A0A0G2JSK5	Integrin beta OS=Rattus norvegicus OX=10116 GN=Itgb1 PE=1 SV=1	1.42811e+08	1.42874e+08	1.54364e+08	1.54322e+08	1.47496e+08	1.8711e+08	1.55121e+08	197584890	1.43636e+08	1.50704e+08	1.40902e+08	1.38301e+08	1.34124e+08	1.37976e+08	1.45294e+08
D3ZZ21	NADH dehydrogenase (Ubiquinone) 1 beta subcomplex, 6 (Predicted) OS=Rattus norvegicus OX=10116 GN=Ndufb6 PE=1 SV=1	3.4686e+08	4.02924e+08	3.72951e+08	3.75948e+08	3.84739e+08	3.20288e+08	3.64719e+08	347377957	3.3704e+08	3.70102e+08	3.39163e+08	3.80093e+08	3.72556e+08	3.22773e+08	3.94397e+08
Q5XIM7	Lysine--tRNA ligase OS=Rattus norvegicus OX=10116 GN=Kars PE=1 SV=1	2.0011e+08	2.05988e+08	2.22758e+08	1.96678e+08	1.94563e+08	1.8053e+08	1.81554e+08	193367356	1.90163e+08	2.23811e+08	2.06359e+08	2.06224e+08	1.88919e+08	2.01565e+08	1.98919e+08
P16975	SPARC OS=Rattus norvegicus OX=10116 GN=Sparc PE=1 SV=4	1.57885e+08	1.54253e+08	1.6043e+08	1.51627e+08	1.41104e+08	1.35241e+08	1.51296e+08	1.42438e+08	1.10116e+08	1.80645e+08	1.60842e+08	1.38401e+08	1.46627e+08	1.39182e+08	1.66917e+08
D3ZP15	RAB9B, member RAS oncogene family OS=Rattus norvegicus OX=10116 GN=Rab9b PE=4 SV=1	1.43097e+08	1.00942e+08	1.64784e+08	1.11767e+08	1.06262e+08	1.21503e+08	1.43071e+08	1.16028e+08	7.83437e+07	1.73304e+08	1.41228e+08	1.10239e+08	1.28877e+08	1.28212e+08	1.2459e+08
D3ZZC1	RCG43947 OS=Rattus norvegicus OX=10116 GN=Txndc5 PE=1 SV=1	1.05963e+08	1.11392e+08	1.1424e+08	1.06703e+08	1.10931e+08	1.09475e+08	1.01377e+08	116787964	8.81682e+07	1.01199e+08	9.19183e+07	8.48977e+07	1.07547e+08	1.02512e+08	1.03412e+08
M0RBS9	Sorting nexin family member 27, isoform CRA_a OS=Rattus norvegicus OX=10116 GN=Snx27 PE=1 SV=1	2.10615e+08	2.26216e+08	2.11757e+08	2.08577e+08	1.92679e+08	1.97181e+08	2.0288e+08	2.03105e+08	1.71849e+08	2.09232e+08	1.91408e+08	2.113e+08	2.11042e+08	2.11159e+08	2.08336e+08
P55063	Heat shock 70 kDa protein 1-like OS=Rattus norvegicus OX=10116 GN=Hspa1l PE=2 SV=2	4.11759e+06	1.47231e+07	1.27695e+07	9.34094e+06	4.30159e+06	6.72907e+06	1.03491e+07	1.48696e+07	4.96634e+06	6.01992e+06	3.50981e+06	7.17984e+06	3.64071e+06	1.04887e+07	1.44885e+07
Q5PQZ9	NADH dehydrogenase [ubiquinone] 1 subunit C2 OS=Rattus norvegicus OX=10116 GN=Ndufc2 PE=1 SV=1	6.99276e+08	7.21899e+08	7.67721e+08	7.4917e+08	7.10167e+08	6.31367e+08	7.0022e+08	7.21693e+08	6.94664e+08	6.84503e+08	6.94839e+08	7.01855e+08	7.28924e+08	7.12476e+08	7.68283e+08
O88321	Antisecretory factor OS=Rattus norvegicus OX=10116 GN=Psmd4 PE=1 SV=1	1.72292e+08	1.68177e+08	1.77833e+08	1.61774e+08	1.55143e+08	1.67822e+08	1.38869e+08	1.31777e+08	1.52052e+08	1.62547e+08	1.62468e+08	1.50196e+08	1.72255e+08	1.476e+08	1.53209e+08
Q9WVK7	Hydroxyacyl-coenzyme A dehydrogenase, mitochondrial OS=Rattus norvegicus OX=10116 GN=Hadh PE=2 SV=1	8.83921e+07	8.89415e+07	9.18752e+07	8.19317e+07	9.14702e+07	9.82415e+07	8.92619e+07	1.17226e+08	9.09498e+07	9.6052e+07	9.58557e+07	1.06901e+08	7.83061e+07	9.31385e+07	9.65342e+07
D3ZJ08	Histone H3 OS=Rattus norvegicus OX=10116 GN=Hist2h3c2 PE=1 SV=1	1.85802e+07	2.15044e+07	1.26377e+07	2.4173e+06	2.70275e+07	1.16459e+07	2.94529e+07	1.34142e+07	4.72056e+07	4.66551e+07	4.20108e+07	2.13252e+07	8.21654e+06	9.58364e+06	8.88675e+06
Q63564	Synaptic vesicle glycoprotein 2B OS=Rattus norvegicus OX=10116 GN=Sv2b PE=1 SV=1	2.68207e+08	3.19005e+08	3.2115e+08	2.85018e+08	2.75896e+08	2.53501e+08	2.79207e+08	2.55306e+08	4.75077e+08	2.99481e+08	2.90821e+08	2.95004e+08	3.06649e+08	2.87737e+08	2.91724e+08
D4A7M0	Plexin C1 OS=Rattus norvegicus OX=10116 GN=Plxnc1 PE=1 SV=3	1.27316e+08	1.43362e+08	1.50637e+08	1.36502e+08	1.20526e+08	8.85266e+07	2.15794e+08	1.45636e+08	1.06008e+08	1.38356e+08	9.77771e+07	1.15923e+08	1.00603e+08	1.32166e+08	1.36997e+08
P53678	AP-3 complex subunit mu-2 OS=Rattus norvegicus OX=10116 GN=Ap3m2 PE=2 SV=1	2.68251e+08	2.80425e+08	2.82059e+08	2.6813e+08	2.76862e+08	2.17272e+08	2.69109e+08	2.51806e+08	2.77975e+08	3.11748e+08	2.93734e+08	2.29662e+08	2.80727e+08	2.70168e+08	2.82231e+08
A0A0G2K9I8	Protein arginine methyltransferase 1-like OS=Rattus norvegicus OX=10116 GN=LOC100361025 PE=3 SV=1	1.46408e+08	1.58207e+08	1.56734e+08	1.49588e+08	1.36739e+08	1.02304e+08	1.56232e+08	1.43762e+08	1.3771e+08	1.49298e+08	1.53532e+08	1.48967e+08	1.46388e+08	1.44182e+08	1.59981e+08
P62243	40S ribosomal protein S8 OS=Rattus norvegicus OX=10116 GN=Rps8 PE=1 SV=2	3.63064e+08	3.4542e+08	3.16147e+08	3.50957e+08	3.89505e+08	3.20663e+08	3.00269e+08	364361840	3.42994e+08	3.77966e+08	4.01578e+08	4.16073e+08	3.50815e+08	3.41531e+08	3.47158e+08
P20595	Guanylate cyclase soluble subunit beta-1 OS=Rattus norvegicus OX=10116 GN=Gucy1b1 PE=1 SV=2	1.60569e+08	1.54526e+08	1.39664e+08	1.59925e+08	1.45738e+08	1.54395e+08	1.49714e+08	156613589	2.16693e+08	1.47229e+08	1.26993e+08	1.36167e+08	1.58891e+08	1.57109e+08	1.67223e+08
P10888	Cytochrome c oxidase subunit 4 isoform 1, mitochondrial OS=Rattus norvegicus OX=10116 GN=Cox4i1 PE=1 SV=1	2.62883e+09	2.80004e+09	2.82871e+09	2.68372e+09	2.49569e+09	2.50449e+09	2.53979e+09	2653223456	2.79025e+09	2.67905e+09	2.43815e+09	2.59987e+09	2.93417e+09	2.63013e+09	2.55543e+09
P16970	ATP-binding cassette sub-family D member 3 OS=Rattus norvegicus OX=10116 GN=Abcd3 PE=1 SV=3	5.47517e+07	5.86e+07	3.46317e+07	5.66894e+07	6.03017e+07	5.95259e+07	4.60217e+07	5.11343e+07	5.83138e+07	5.40094e+07	5.41733e+07	6.5859e+07	5.1024e+07	5.31972e+07	4.66402e+07
Q9JHB5	Translin-associated protein X OS=Rattus norvegicus OX=10116 GN=Tsnax PE=1 SV=1	7.08421e+07	7.89201e+07	6.97382e+07	7.2405e+07	7.37362e+07	6.22867e+07	9.34904e+07	6.86799e+07	4.31946e+07	7.66879e+07	4.64076e+07	7.71691e+07	6.2198e+07	6.1935e+07	8.16966e+07
A0A0G2K777	Ras homolog family member T1 OS=Rattus norvegicus OX=10116 GN=Rhot1 PE=1 SV=1	1.60676e+08	1.66897e+08	1.67133e+08	1.58116e+08	1.51592e+08	1.43917e+08	1.49892e+08	1.49553e+08	1.60407e+08	1.58794e+08	1.5022e+08	1.45481e+08	1.52089e+08	1.55217e+08	1.51583e+08
Q7TP57	Signal transducer and activator of transcription OS=Rattus norvegicus OX=10116 PE=2 SV=1	9.35722e+07	1.29988e+08	9.58957e+07	9.55363e+07	7.92769e+07	6.35593e+07	9.8274e+07	1.1279e+08	6.42009e+07	1.16886e+08	7.69823e+07	1.09947e+08	1.15808e+08	1.10677e+08	9.89206e+07
F1LM19	Uncharacterized protein OS=Rattus norvegicus OX=10116 PE=1 SV=3	2.20893e+08	1.46231e+08	1.5031e+08	2.16189e+08	1.60623e+08	1.83754e+08	1.67986e+08	208763070	1.43616e+08	1.43586e+08	9.65311e+07	1.53044e+08	1.7508e+08	1.98422e+08	1.50581e+08
Q78P75	Dynein light chain 2, cytoplasmic OS=Rattus norvegicus OX=10116 GN=Dynll2 PE=1 SV=1	1.03726e+09	1.04247e+09	1.02135e+09	9.86913e+08	9.40121e+08	1.11851e+09	9.90736e+08	934237232	9.41396e+08	1.0538e+09	1.02755e+09	9.4646e+08	1.00919e+09	9.85954e+08	1.00162e+09
B2GUV5	V-type proton ATPase subunit G OS=Rattus norvegicus OX=10116 GN=Atp6v1g1 PE=1 SV=1	1.22041e+08	1.18966e+08	1.15501e+08	1.25447e+08	1.38283e+08	1.77239e+08	1.25522e+08	1.04053e+08	1.30957e+08	1.63623e+08	1.53234e+08	1.56164e+08	9.83505e+07	1.09546e+08	9.41261e+07
Q5XIT9	Methylcrotonoyl-CoA carboxylase beta chain, mitochondrial OS=Rattus norvegicus OX=10116 GN=Mccc2 PE=2 SV=1	9.68947e+07	9.27661e+07	9.65616e+07	8.67499e+07	9.24534e+07	9.81986e+07	8.97231e+07	9.11173e+07	9.27935e+07	8.64516e+07	7.88137e+07	8.28275e+07	9.28808e+07	7.76595e+07	9.54041e+07
D4A1H2	Phosphatidylinositol-specific phospholipase C, X domain-containing 3 OS=Rattus norvegicus OX=10116 GN=Plcxd3 PE=4 SV=1	2.9494e+08	3.00536e+08	2.71846e+08	1.85819e+08	2.75823e+08	1.91577e+08	2.36956e+08	252412889	2.82377e+08	3.2165e+08	2.83844e+08	2.54971e+08	2.86787e+08	2.12015e+08	2.77191e+08
D4A0E8	Protein arginine N-methyltransferase 5 OS=Rattus norvegicus OX=10116 GN=Prmt5 PE=1 SV=1	1.29176e+08	1.2725e+08	1.23469e+08	1.17291e+08	1.39516e+08	1.01175e+08	1.21055e+08	1.14712e+08	1.058e+08	1.23312e+08	1.15851e+08	1.27118e+08	1.27064e+08	1.22802e+08	1.42627e+08
P07150	Annexin A1 OS=Rattus norvegicus OX=10116 GN=Anxa1 PE=1 SV=2	7.68217e+07	1.10124e+08	1.1677e+08	1.50113e+08	7.00255e+07	1.42731e+08	9.63699e+07	1.38064e+08	5.54713e+07	1.43134e+08	1.12382e+08	1.0483e+08	4.75216e+07	9.37767e+07	7.6377e+07
D3ZKQ4	RAB, member RAS oncogene family-like 6 OS=Rattus norvegicus OX=10116 GN=Rabl6 PE=1 SV=1	1.51981e+08	1.51554e+08	1.71497e+08	1.59891e+08	1.42345e+08	1.51088e+08	1.40448e+08	159057117	1.71553e+08	1.4699e+08	1.32522e+08	1.22386e+08	1.50867e+08	1.67388e+08	1.78898e+08
Q5EGY4	Synaptobrevin homolog YKT6 OS=Rattus norvegicus OX=10116 GN=Ykt6 PE=1 SV=1	2.72233e+08	3.02559e+08	3.13239e+08	2.80543e+08	3.03701e+08	2.40089e+08	2.88693e+08	270910541	3.06572e+08	3.26714e+08	3.17503e+08	2.99786e+08	3.21684e+08	3.22323e+08	3.24328e+08
A1L1J8	RAB5B, member RAS oncogene family OS=Rattus norvegicus OX=10116 GN=Rab5b PE=1 SV=1	1.02937e+08	1.40946e+08	5.50713e+07	1.1119e+08	1.37063e+08	1.12997e+08	1.55937e+08	6.72542e+07	1.08639e+08	1.10943e+08	9.93563e+07	1.26754e+08	1.37473e+08	1.35236e+08	1.2986e+08
Q5XFX0	Transgelin-2 OS=Rattus norvegicus OX=10116 GN=Tagln2 PE=1 SV=1	1.19245e+08	1.18932e+08	1.2105e+08	1.58553e+08	1.62557e+08	1.74492e+08	9.87194e+07	2.09668e+08	1.34935e+08	1.11232e+08	8.98628e+07	9.13916e+07	1.04074e+08	1.32368e+08	1.0094e+08
Q5PPN5	Tubulin polymerization-promoting protein family member 3 OS=Rattus norvegicus OX=10116 GN=Tppp3 PE=2 SV=1	6.7081e+08	6.8207e+08	6.71879e+08	6.14544e+08	5.4855e+08	5.95033e+08	6.20656e+08	584027996	4.55686e+08	5.45525e+08	4.8543e+08	4.70682e+08	6.10358e+08	6.15372e+08	6.16721e+08
A0A0G2KAL9	Mitochondrial fission factor OS=Rattus norvegicus OX=10116 GN=Mff PE=1 SV=1	1.47081e+08	1.59631e+08	1.41376e+08	1.4378e+08	1.41028e+08	1.27668e+08	1.2539e+08	1.23822e+08	1.54623e+08	1.73922e+08	1.57503e+08	1.27025e+08	1.28905e+08	1.69372e+08	1.34294e+08
F1LQS3	60S ribosomal protein L6 OS=Rattus norvegicus OX=10116 PE=3 SV=1	5.4833e+08	5.36576e+08	5.38253e+08	5.59993e+08	5.24114e+08	4.79779e+08	4.79892e+08	5.00176e+08	4.85126e+08	5.04457e+08	3.47272e+08	4.6386e+08	5.20226e+08	5.28456e+08	5.46058e+08
M0R776	Mitochondrial ribosomal protein S36 OS=Rattus norvegicus OX=10116 GN=Mrps36 PE=1 SV=1	1.85412e+08	1.95717e+08	1.8378e+08	1.90373e+08	1.89581e+08	2.40378e+08	1.81479e+08	1.61142e+08	2.4911e+08	1.89641e+08	2.08724e+08	1.45634e+08	1.82043e+08	1.83753e+08	1.694e+08
D4A994	ER membrane protein complex subunit 1 OS=Rattus norvegicus OX=10116 GN=Emc1 PE=1 SV=1	1.03669e+08	1.04448e+08	1.10346e+08	1.06188e+08	1.11301e+08	7.75843e+07	1.13848e+08	1.06112e+08	9.87501e+07	1.05303e+08	1.06103e+08	8.84144e+07	8.4486e+07	1.04349e+08	1.11894e+08
D4AD82	Rho GTPase-activating protein 35 OS=Rattus norvegicus OX=10116 GN=Arhgap35 PE=1 SV=3	1.04993e+08	1.43294e+08	1.03478e+08	1.3e+08	1.1896e+08	8.8737e+07	1.09532e+08	1.34577e+08	1.12042e+08	1.09035e+08	1.18522e+08	9.12167e+07	1.3992e+08	1.12771e+08	1.40451e+08
B1WC32	RCG53609 OS=Rattus norvegicus OX=10116 GN=Uba2 PE=2 SV=1	6.23213e+07	6.96615e+07	6.48156e+07	6.15815e+07	6.69695e+07	6.5748e+07	6.51816e+07	6.08924e+07	5.97253e+07	7.55977e+07	6.16256e+07	5.10603e+07	6.1628e+07	4.85828e+07	6.82156e+07
A0A0G2K273	Eukaryotic translation initiation factor 3 subunit E OS=Rattus norvegicus OX=10116 GN=LOC100909481 PE=3 SV=1	1.40401e+08	2.00595e+08	2.03527e+08	1.97344e+08	1.32545e+08	1.35287e+08	1.5059e+08	1.8746e+08	1.63512e+08	1.66252e+08	1.78469e+08	1.27806e+08	1.39091e+08	1.30814e+08	1.46692e+08
Q63692	Hsp90 co-chaperone Cdc37 OS=Rattus norvegicus OX=10116 GN=Cdc37 PE=1 SV=2	3.09337e+08	3.17805e+08	3.20749e+08	3.07536e+08	2.96332e+08	2.83081e+08	3.09982e+08	284849754	2.86013e+08	3.05434e+08	3.05048e+08	2.76361e+08	3.04516e+08	3.06579e+08	3.025e+08
P08082	Clathrin light chain B OS=Rattus norvegicus OX=10116 GN=Cltb PE=1 SV=1	1.1499e+09	1.17623e+09	1.31918e+09	1.14369e+09	1.14945e+09	1.13461e+09	1.17212e+09	1182569696	1.25551e+09	1.14292e+09	1.05068e+09	1.06662e+09	1.17756e+09	1.1489e+09	1.21941e+09
P04177	Tyrosine 3-monooxygenase OS=Rattus norvegicus OX=10116 GN=Th PE=1 SV=3	3.94193e+07	3.71238e+07	3.82663e+07	3.9076e+07	5.84198e+07	3.52158e+07	3.54386e+07	3.17745e+07	1.28817e+08	3.92046e+07	2.60833e+07	3.97282e+07	4.23307e+07	2.54163e+07	3.56864e+07
A0A0G2K3L8	WD repeat and FYVE domain-containing 1 OS=Rattus norvegicus OX=10116 GN=Wdfy1 PE=1 SV=1	1.47516e+08	1.64024e+08	1.54491e+08	1.60889e+08	1.60626e+08	1.52207e+08	1.75528e+08	160577589	1.37013e+08	1.30144e+08	1.32449e+08	1.48399e+08	1.82781e+08	1.5041e+08	1.69264e+08
D3ZAD6	Neurexin-2 OS=Rattus norvegicus OX=10116 GN=Nrxn2 PE=4 SV=3			3.80146e+06									2.97235e+06		1.64869e+06	5.56303e+06
P11530	Dystrophin OS=Rattus norvegicus OX=10116 GN=Dmd PE=1 SV=2	3.87472e+07	4.75852e+07	4.90585e+07	3.86403e+07	4.63738e+07	4.06931e+07	5.24561e+07	3.84437e+07	5.40087e+07	4.19105e+07	3.96773e+07	3.56655e+07	3.9725e+07	3.88025e+07	4.06726e+07
D3ZD23	ATP-binding cassette subfamily E member 1 OS=Rattus norvegicus OX=10116 GN=Abce1 PE=1 SV=1	8.57111e+07	8.86657e+07	9.75912e+07	8.15436e+07	7.86229e+07	8.14934e+07	8.66903e+07	8.7648e+07	6.7231e+07	8.76656e+07	9.82536e+07	1.15045e+08	9.68868e+07	1.05958e+08	8.45908e+07
Q62688	Inactive phospholipase C-like protein 1 OS=Rattus norvegicus OX=10116 GN=Plcl1 PE=1 SV=1	9.91875e+07	1.10109e+08	1.2979e+08	1.1497e+08	1.12799e+08	1.13849e+08	7.54443e+07	1.12583e+08	8.72923e+07	1.00432e+08	1.1758e+08	1.368e+08	1.07582e+08	1.21786e+08	1.26989e+08
D4A1A5	Serine/threonine-protein phosphatase 2A 56 kDa regulatory subunit OS=Rattus norvegicus OX=10116 GN=Ppp2r5c PE=1 SV=2	3.11493e+07	2.38039e+07	2.53528e+07	2.33438e+07	2.7201e+07	2.17624e+07	2.57156e+07	26141856	2.79397e+07	2.52612e+07	2.47073e+07	2.91174e+07	2.30393e+07	2.67731e+07	3.0613e+07
P17077	60S ribosomal protein L9 OS=Rattus norvegicus OX=10116 GN=Rpl9 PE=1 SV=1	3.1156e+08	3.37478e+08	2.99951e+08	3.09148e+08	3.33909e+08	2.93359e+08	3.06742e+08	2.99724e+08	3.22809e+08	3.66548e+08	3.25393e+08	3.24689e+08	3.1991e+08	3.14402e+08	3.11729e+08
D4A1Q9	Tubulin tyrosine ligase-like 12 OS=Rattus norvegicus OX=10116 GN=Ttll12 PE=1 SV=1	9.21023e+07	8.87092e+07	9.56291e+07	7.3047e+07	8.40521e+07	5.9823e+07	6.55973e+07	6.90925e+07	6.36812e+07	1.15019e+08	9.53614e+07	8.65392e+07	8.60655e+07	8.76418e+07	7.85901e+07
Z4YNF4	Low molecular weight phosphotyrosine protein phosphatase OS=Rattus norvegicus OX=10116 GN=Acp1 PE=1 SV=2	3.05656e+08	3.39992e+08	3.02162e+08	3.06674e+08	3.16059e+08	3.82234e+08	3.56853e+08	300938409	2.9017e+08	3.07453e+08	2.76322e+08	2.10887e+08	3.04751e+08	2.63625e+08	3.35049e+08
D3ZGE6	Cortactin, isoform CRA_c OS=Rattus norvegicus OX=10116 GN=Cttn PE=1 SV=3	4.86316e+08	5.13269e+08	4.51278e+08	4.52305e+08	4.62517e+08	3.69849e+08	4.22385e+08	369363641	4.77677e+08	4.14832e+08	4.10004e+08	4.21837e+08	4.28099e+08	4.5602e+08	4.25104e+08
Q3MID6	Calumenin OS=Rattus norvegicus OX=10116 GN=Calu PE=1 SV=1	6.8004e+06	9.085e+06	1.00274e+07	9.70392e+06		1.18445e+07	7.05922e+06	9590467	1.20737e+07	6.41517e+06	9.22365e+06		1.00176e+07
A0A0U1RVI2	Mitogen-activated protein kinase OS=Rattus norvegicus OX=10116 GN=Mapk10 PE=4 SV=1	8.18016e+07	8.54237e+07	8.75109e+07	9.2811e+07	8.09625e+07	7.99464e+07	8.01954e+07	77271241	8.90028e+07	7.28885e+07	7.09629e+07	7.92832e+07	8.81471e+07	8.77475e+07	8.47658e+07
B0BN83	Armadillo repeat-containing protein 1 OS=Rattus norvegicus OX=10116 GN=Armc1 PE=1 SV=1	1.09189e+09	1.18943e+09	1.36848e+09	1.30435e+09	1.15004e+09	7.91865e+08	1.12099e+09	1206727599	1.04869e+09	1.3226e+09	1.12528e+09	1.25955e+09	1.29727e+09	1.31809e+09	1.34004e+09
D4A022	GTPase-activating protein and VPS9 domains 1 OS=Rattus norvegicus OX=10116 GN=Gapvd1 PE=1 SV=3	5.13591e+07	4.36139e+07	4.12687e+07	4.29177e+07	5.52524e+07	4.36511e+07	4.84838e+07	4.2144e+07	3.8532e+07	5.32542e+07	4.87684e+07	5.40457e+07	5.49998e+07	4.19641e+07	5.334e+07
Q642B0	Glypican 4 OS=Rattus norvegicus OX=10116 GN=Gpc4 PE=1 SV=1	8.12647e+07	9.10211e+07	8.35471e+07	8.23356e+07	8.59242e+07	7.03316e+07	7.79491e+07	70891452	5.45647e+07	8.62874e+07	7.68366e+07	5.61725e+07	8.64842e+07	8.21641e+07	8.79579e+07
B2RZC6	Ilf2 protein OS=Rattus norvegicus OX=10116 GN=Ilf2 PE=1 SV=1	1.98436e+08	2.01177e+08	1.93466e+08	1.71914e+08	1.79861e+08	1.62962e+08	1.72421e+08	1.76257e+08	1.55313e+08	2.02321e+08	1.86424e+08	1.6935e+08	1.80592e+08	1.76369e+08	1.97529e+08
Q4V8B7	Inactive hydroxysteroid dehydrogenase-like protein 1 OS=Rattus norvegicus OX=10116 GN=Hsdl1 PE=2 SV=1	1.42433e+08	1.40921e+08	1.47093e+08	1.30574e+08	1.31109e+08	1.24627e+08	1.40021e+08	1.27667e+08	1.40166e+08	1.461e+08	1.39529e+08	1.40195e+08	1.39743e+08	1.38683e+08	1.40218e+08
G3V7G9	Eukaryotic translation initiation factor 3, subunit 6 interacting protein OS=Rattus norvegicus OX=10116 GN=Eif3l PE=1 SV=2	9.91854e+07	1.00999e+08	1.04485e+08	9.83483e+07	8.07504e+07	8.13665e+07	1.01954e+08	1.14841e+08	8.64353e+07	1.05036e+08	8.5935e+07	1.00635e+08	9.98853e+07	1.06123e+08	1.28376e+08
Q6MG60	N(G),N(G)-dimethylarginine dimethylaminohydrolase 2 OS=Rattus norvegicus OX=10116 GN=Ddah2 PE=1 SV=1	1.83127e+08	1.88699e+08	1.91585e+08	2.01314e+08	1.78481e+08	1.97115e+08	1.81585e+08	202463230	1.67181e+08	1.76903e+08	1.63695e+08	1.96782e+08	1.9142e+08	1.93478e+08	1.92892e+08
P62963	Profilin-1 OS=Rattus norvegicus OX=10116 GN=Pfn1 PE=1 SV=2	1.38656e+09	1.34822e+09	1.34667e+09	1.34311e+09	1.45115e+09	1.32468e+09	1.35107e+09	1396478383	1.3484e+09	1.45724e+09	1.37122e+09	1.42214e+09	1.36927e+09	1.33895e+09	1.42441e+09
Q4KM71	Splicing factor proline/glutamine rich (Polypyrimidine tract binding protein associated) OS=Rattus norvegicus OX=10116 GN=Sfpq PE=2 SV=1	1.13695e+07	1.46457e+07	1.46232e+07	1.79975e+07	2.31137e+07	1.99788e+07	1.15326e+07	1.70635e+07	1.61311e+08	1.72049e+07	1.7447e+07	7.91797e+06	1.54199e+07	1.02513e+07	4.01885e+06
G3V667	Integrin subunit alpha 6 OS=Rattus norvegicus OX=10116 GN=Itga6 PE=1 SV=1	8.33346e+07	1.13007e+08	6.75514e+07	1.02531e+08	7.08162e+07	8.82686e+07	6.63534e+07	92975595	5.31109e+07	1.06552e+08	7.38526e+07	1.02464e+08	9.6513e+07	9.19761e+07	8.9086e+07
O88768	ArfGAP with dual PH domains 1 OS=Rattus norvegicus OX=10116 GN=Adap1 PE=2 SV=1	1.23873e+08	1.02145e+08	8.57205e+07	1.14959e+08	1.08779e+08	7.44007e+07	1.2262e+08	9.20467e+07	1.05779e+08	8.89767e+07	6.2794e+07	6.50071e+07	9.77309e+07	8.81792e+07	9.71182e+07
A0A0G2JZH0	Calcium-binding protein 39 OS=Rattus norvegicus OX=10116 GN=Cab39 PE=1 SV=1	3.09934e+08	2.82103e+08	2.9706e+08	2.96892e+08	2.72109e+08	2.6908e+08	2.99107e+08	275962411	2.83154e+08	3.16375e+08	2.73138e+08	2.88164e+08	2.85081e+08	2.72353e+08	2.89936e+08
B0BN81	40S ribosomal protein S5 OS=Rattus norvegicus OX=10116 GN=Rps5 PE=1 SV=1	2.34152e+08	2.40175e+08	1.97172e+08	1.93138e+08	2.13114e+08	2.06463e+08	2.47784e+08	2.41292e+08	2.0337e+08	2.1413e+08	2.26189e+08	2.06214e+08	2.08624e+08	1.9976e+08	2.16015e+08
F1LNP8	Nectin cell adhesion molecule 1 OS=Rattus norvegicus OX=10116 GN=Nectin1 PE=1 SV=2	7.80514e+07	7.60808e+07	8.27009e+07	6.95606e+07	7.09525e+07	7.23234e+07	6.80696e+07	7.59144e+07	6.99147e+07	7.15158e+07	7.29994e+07	5.86869e+07	7.6761e+07	6.4387e+07	7.04131e+07
Q5EB55	Gbe1 protein (Fragment) OS=Rattus norvegicus OX=10116 GN=Gbe1 PE=2 SV=1	5.8152e+07	5.80433e+07	5.9351e+07	5.81284e+07	6.11542e+07	5.19391e+07	5.88142e+07	55368921	5.9253e+07	6.61336e+07	6.72501e+07	7.216e+07	7.77826e+07	6.4207e+07	6.4638e+07
Q9Z0J5	Thioredoxin reductase 2, mitochondrial OS=Rattus norvegicus OX=10116 GN=Txnrd2 PE=1 SV=3	6.51329e+07	6.46622e+07	7.50504e+07	5.70792e+07	6.38756e+07	5.0192e+07	6.21828e+07	5.52419e+07	5.99838e+07	6.49166e+07	6.34843e+07	3.73079e+07	6.70387e+07	5.91674e+07	5.5319e+07
Q5RJR2	Twinfilin-1 OS=Rattus norvegicus OX=10116 GN=Twf1 PE=1 SV=1	1.68029e+08	1.70003e+08	2.33459e+08	2.14781e+08	2.08461e+08	2.09591e+08	1.67488e+08	196357416	1.78107e+08	2.13212e+08	1.97638e+08	1.81493e+08	1.80878e+08	1.83635e+08	1.93877e+08
D3ZE15	NADH:ubiquinone oxidoreductase subunit A13 OS=Rattus norvegicus OX=10116 GN=Ndufa13 PE=1 SV=1	8.79699e+08	8.74616e+08	9.08287e+08	8.38017e+08	6.22963e+08	9.69545e+08	8.51275e+08	8.51346e+08	8.4439e+08	6.104e+08	6.77061e+08	8.52419e+08	6.23025e+08	6.41178e+08	6.9353e+08
F1LT36	Uncharacterized protein OS=Rattus norvegicus OX=10116 GN=Rps10l1 PE=4 SV=2	3.02063e+08	2.95388e+08	2.82125e+08	3.03747e+08	3.04615e+08	2.94443e+08	3.1044e+08	2.99345e+08	2.93569e+08	3.22158e+08	3.27604e+08	3.03812e+08	3.2558e+08	2.88256e+08	3.25961e+08
Q5M7A7	CB1 cannabinoid receptor-interacting protein 1 OS=Rattus norvegicus OX=10116 GN=Cnrip1 PE=1 SV=1	3.21182e+08	3.4267e+08	3.47706e+08	3.32411e+08	3.61949e+08	3.10249e+08	3.37119e+08	313344159	3.74272e+08	4.26321e+08	3.84087e+08	3.68164e+08	3.77149e+08	3.02419e+08	3.37007e+08
D3ZQ02	WD repeat domain 37 OS=Rattus norvegicus OX=10116 GN=Wdr37 PE=1 SV=3	1.17664e+08	1.24917e+08	1.37537e+08	1.23503e+08	1.66097e+08	2.17017e+08	1.27585e+08	106739833	1.33614e+08	2.14408e+08	2.29549e+08	1.95476e+08	1.31614e+08	1.34577e+08	1.29613e+08
A0A0G2K761	Cullin 2 OS=Rattus norvegicus OX=10116 GN=Cul2 PE=1 SV=1	1.34555e+08	1.4043e+08	1.05393e+08	1.52305e+08	1.36366e+08	1.04505e+08	1.70947e+08	1.18966e+08	1.30194e+08	8.89868e+07	1.22112e+08	1.36299e+08	7.49468e+07	1.13166e+08	1.14232e+08
Q9Z250	Protein lin-7 homolog A OS=Rattus norvegicus OX=10116 GN=Lin7a PE=1 SV=2	6.0481e+07	5.90764e+07	7.2304e+07	6.82964e+07	6.28253e+07	8.18073e+07	5.74995e+07	5.68766e+07	8.84106e+07	7.2246e+07	7.49345e+07	5.98008e+07	5.79856e+07	6.40345e+07	6.99063e+07
Q8K3P6	Calcium-binding mitochondrial carrier protein SCaMC-2 OS=Rattus norvegicus OX=10116 GN=Slc25a25 PE=1 SV=1	1.09212e+08	1.21821e+08	1.27963e+08	1.09126e+08	1.16862e+08	1.02124e+08	1.04703e+08	103865282	8.97506e+07	1.28749e+08	1.34482e+08	1.06545e+08	1.22391e+08	1.01992e+08	1.12488e+08
D3ZDU2	Regulatory-associated protein of MTOR, complex 1 OS=Rattus norvegicus OX=10116 GN=Rptor PE=1 SV=2	5.10822e+07	4.82868e+07	4.18206e+07	5.00791e+07	4.33718e+07	4.3362e+07	5.22866e+07	4.6717e+07	4.31436e+07	6.00558e+07	4.83234e+07	4.69093e+07	5.20986e+07	3.10602e+07	4.37339e+07
D4AAR7	Coiled-coil domain-containing 136 OS=Rattus norvegicus OX=10116 GN=Ccdc136 PE=1 SV=3	6.08659e+07	5.06814e+07	5.81073e+07	5.14904e+07	5.6652e+07	5.02533e+07	4.72894e+07	46372434	5.53475e+07	5.55957e+07	5.48766e+07	5.84883e+07	6.04318e+07	5.41154e+07	4.86666e+07
Q4KMA2	UV excision repair protein RAD23 homolog B OS=Rattus norvegicus OX=10116 GN=Rad23b PE=1 SV=1	4.42174e+08	4.72106e+08	4.79738e+08	4.79505e+08	4.38089e+08	4.47072e+08	4.52294e+08	461467405	4.28773e+08	4.64948e+08	4.36194e+08	4.22292e+08	4.41252e+08	4.37495e+08	4.97376e+08
A0A146J2K6	Lasp-2 OS=Rattus norvegicus OX=10116 GN=Nebl PE=2 SV=1	9.91117e+07	9.60246e+07	8.3578e+07	8.68078e+07	1.00896e+08	1.15521e+08	9.30034e+07	7.72581e+07	9.76516e+07	9.40945e+07	9.61886e+07	9.19281e+07	6.19553e+07	1.02568e+08	1.03348e+08
Q63488	Sodium-dependent phosphate transporter 2 OS=Rattus norvegicus OX=10116 GN=Slc20a2 PE=1 SV=1	1.03556e+08	1.15846e+08	1.47359e+08	1.16747e+08	1.2065e+08	1.00819e+08	1.35439e+08	1.21142e+08	1.16326e+08	1.23489e+08	1.26464e+08	1.15778e+08	1.34204e+08	1.15508e+08	1.32372e+08
Q7TQ94	Deaminated glutathione amidase OS=Rattus norvegicus OX=10116 GN=Nit1 PE=2 SV=2	5.88654e+07	6.87288e+07	5.39287e+07	4.62832e+07	7.25682e+07	5.87249e+07	7.4361e+07	5.55168e+07	5.98224e+07	3.40237e+07	4.65812e+07	4.50611e+07	5.25474e+07	5.72643e+07	5.65215e+07
Q4V8I7	Volume-regulated anion channel subunit LRRC8A OS=Rattus norvegicus OX=10116 GN=Lrrc8a PE=1 SV=1	1.85453e+08	1.59375e+08	1.72066e+08	2.01719e+08	1.63657e+08	1.61771e+08	2.03225e+08	1.59971e+08	2.14894e+08	1.14159e+08	1.34941e+08	1.90861e+08	1.64219e+08	1.81763e+08	2.03015e+08
F1LP01	Diacylglycerol kinase OS=Rattus norvegicus OX=10116 GN=Dgkb PE=1 SV=2	9.91321e+07	1.0362e+08	1.03623e+08	8.43127e+07	7.02913e+07	5.73576e+07	9.81993e+07	1.03774e+08	1.87339e+08	6.31308e+07	9.44475e+07	5.44638e+07	8.92877e+07	8.44915e+07	9.40347e+07
G3V644	NADH dehydrogenase (Ubiquinone) flavoprotein 3-like, isoform CRA_a OS=Rattus norvegicus OX=10116 GN=Ndufv3 PE=1 SV=1	3.32327e+07	4.69837e+07	6.23614e+07	4.28031e+07	5.39733e+07	4.30135e+07	2.95428e+07	49497636	1.39428e+08	1.67169e+07	5.40924e+06	8.40931e+06	1.95562e+07	3.01182e+07	3.52183e+07
Q9WUW2	Vesicle associated membrane protein 2B OS=Rattus norvegicus OX=10116 GN=vamp2 PE=2 SV=1	7.30979e+08	7.41271e+08	6.72438e+08	5.80621e+08	7.05114e+08	6.10406e+08	6.88895e+08	6.49406e+08	7.5166e+08	7.59911e+08	6.75313e+08	5.61596e+08	6.84669e+08	6.37051e+08	6.96064e+08
B2RYU2	RCG45615, isoform CRA_a OS=Rattus norvegicus OX=10116 GN=Rpl12 PE=2 SV=1	2.57648e+08	2.823e+08	2.71258e+08	2.72467e+08	2.59447e+08	2.76241e+08	2.55773e+08	276414816	1.81466e+08	3.58049e+08	3.45358e+08	3.66936e+08	2.71439e+08	2.48307e+08	2.6509e+08
B2DD29	Serine/threonine-protein kinase BRSK1 OS=Rattus norvegicus OX=10116 GN=Brsk1 PE=1 SV=1	3.84958e+07	4.96325e+07	5.4891e+07	4.45547e+07	4.59587e+07	3.7922e+07	4.28606e+07	3.50186e+07	5.64263e+07	5.8754e+07	6.2447e+07	4.67578e+07	7.10617e+07	4.15129e+07	3.64034e+07
B5DEZ6	Glucosamine-6-phosphate isomerase OS=Rattus norvegicus OX=10116 GN=Gnpda2 PE=1 SV=1	3.44947e+07	3.56445e+07	3.54018e+07	3.69703e+07	2.96456e+07	2.92038e+07	3.95376e+07	3.66156e+07	3.25314e+07	3.3931e+07	2.8889e+07	3.44266e+07	2.78195e+07	3.57251e+07	3.05657e+07
P00173	Cytochrome b5 OS=Rattus norvegicus OX=10116 GN=Cyb5a PE=1 SV=2	1.71371e+08	1.59239e+08	1.71154e+08	1.74358e+08	1.52e+08	1.80609e+08	9.66076e+07	188419948	1.50611e+08	1.77063e+08	1.46482e+08	1.59109e+08	1.65292e+08	1.6274e+08	1.50778e+08
F1LU71	Methylglutaconyl-CoA hydratase, mitochondrial OS=Rattus norvegicus OX=10116 GN=Auh PE=1 SV=2	8.15418e+08	8.51511e+08	8.53851e+08	8.90601e+08	7.78311e+08	7.78384e+08	7.02386e+08	761895114	7.8173e+08	7.57079e+08	9.42827e+08	8.216e+08	8.31561e+08	7.72357e+08	8.52679e+08
A0A0G2K291	Sulfotransferase OS=Rattus norvegicus OX=10116 GN=Sult1d1 PE=3 SV=1	2.52755e+08	2.86728e+08	2.74875e+08	2.47082e+08	2.10459e+08	1.9719e+08	2.47285e+08	2.38052e+08	1.64342e+08	1.771e+08	1.43861e+08	1.16588e+08	2.45625e+08	2.37569e+08	2.56492e+08
P62919	60S ribosomal protein L8 OS=Rattus norvegicus OX=10116 GN=Rpl8 PE=2 SV=2	2.22718e+08	2.35433e+08	2.52607e+08	2.51325e+08	2.88101e+08	3.59282e+08	2.20858e+08	211881627	2.31113e+08	3.2051e+08	3.1176e+08	3.21548e+08	2.40684e+08	2.01143e+08	2.01835e+08
Q9WVB1	Ras-related protein Rab-6A OS=Rattus norvegicus OX=10116 GN=Rab6a PE=1 SV=2	1.43736e+08	4.57689e+08	1.45651e+08	1.60035e+08	4.71919e+08	1.44343e+08	2.37964e+08	139425800	1.33013e+08	1.59748e+08	1.45747e+08	2.72336e+08	3.47325e+08	1.44361e+08	3.65325e+08
D3ZXA6	Pyruvate dehydrogenase phosphatase regulatory subunit OS=Rattus norvegicus OX=10116 GN=Pdpr PE=1 SV=1	6.36255e+07	5.69515e+07	5.28629e+07	6.27819e+07	5.37805e+07	7.21497e+07	7.05661e+07	6.71097e+07	7.12861e+07	6.28039e+07	6.53793e+07	6.66404e+07	6.85842e+07	6.641e+07	5.96193e+07
A0A096MIT7	Synapsin-3 OS=Rattus norvegicus OX=10116 GN=Syn3 PE=1 SV=2	9.99365e+07	1.03944e+08	1.04565e+08	8.71782e+07	1.10348e+08	7.33221e+07	9.95798e+07	93822115	1.39039e+08	1.04172e+08	8.16243e+07	1.03982e+08	7.93701e+07	8.32116e+07	8.57487e+07
D4AAM0	Transportin 3 OS=Rattus norvegicus OX=10116 GN=Tnpo3 PE=1 SV=2	6.60827e+07	6.67595e+07	6.74626e+07	6.7914e+07	7.06059e+07	6.13682e+07	8.11824e+07	6.25721e+07	7.10899e+07	7.5738e+07	6.72464e+07	6.48828e+07	5.87937e+07	6.42813e+07	7.02365e+07
Q66SY1	Clathrin-assembly lymphoid leukemia protein OS=Rattus norvegicus OX=10116 GN=Picalm PE=1 SV=1
Q8R1R5	CD99 antigen-like protein 2 OS=Rattus norvegicus OX=10116 GN=Cd99l2 PE=2 SV=1	1.13633e+08	1.26087e+08	1.08252e+08	1.49411e+08	1.67788e+08	1.87677e+08	1.0091e+08	97971405	1.03238e+08	1.66248e+08	1.36587e+08	1.01036e+08	1.03716e+08	1.02242e+08	9.8231e+07
P63170	Dynein light chain 1, cytoplasmic OS=Rattus norvegicus OX=10116 GN=Dynll1 PE=1 SV=1	1.22356e+08	1.37328e+08	1.45184e+08	1.40344e+08	1.27812e+08	1.28648e+08	1.37825e+08	125790016	1.26492e+08	1.2553e+08	1.32571e+08	1.61007e+08	1.31608e+08	1.30608e+08	1.57386e+08
Q5PPG6	Nucleosome assembly protein 1-like 5 OS=Rattus norvegicus OX=10116 GN=Nap1l5 PE=2 SV=1	5.37083e+08	5.43044e+08	5.60192e+08	5.24293e+08	4.89386e+08	4.78057e+08	5.08807e+08	507217200	3.46842e+08	5.24712e+08	4.86734e+08	5.07215e+08	5.51538e+08	4.89217e+08	5.0326e+08
B2GV92	Ptges3 protein OS=Rattus norvegicus OX=10116 GN=Ptges3 PE=1 SV=1	7.62645e+08	8.97966e+08	8.63432e+08	7.8713e+08	8.30318e+08	7.61329e+08	8.25104e+08	815143874	7.35843e+08	9.01111e+08	7.2255e+08	7.6804e+08	7.78882e+08	7.39511e+08	8.25581e+08
B1WBW9	Abhd10 protein OS=Rattus norvegicus OX=10116 GN=Abhd10 PE=2 SV=1	5.10265e+07	4.99263e+07	4.38586e+07	4.64152e+07	4.69692e+07	5.09031e+07	5.36863e+07	4.9663e+07	2.64139e+07	8.54754e+07	1.23951e+08	8.7482e+07	5.09081e+07	6.28447e+07	5.1415e+07
Q99MS0	SEC14-like protein 2 OS=Rattus norvegicus OX=10116 GN=Sec14l2 PE=1 SV=1	1.37521e+08	1.3091e+08	1.2921e+08	1.201e+08	1.22301e+08	1.13147e+08	1.0367e+08	9.34816e+07	1.33929e+08	1.31338e+08	1.14003e+08	1.37485e+08	1.37205e+08	1.29577e+08	1.27915e+08
A0A0G2JTA0	FAS-associated factor 2 OS=Rattus norvegicus OX=10116 GN=Faf2 PE=1 SV=1	3.71617e+07	3.89212e+07	3.37553e+07	3.48856e+07	3.85552e+07	3.45985e+07	4.76922e+07	3.88097e+07	4.10429e+07	6.03289e+07	5.19036e+07	3.93259e+07	3.39072e+07	2.82215e+07	3.65888e+07
A0A0G2JXT8	Filamin B OS=Rattus norvegicus OX=10116 GN=Flnb PE=1 SV=1	9.66222e+07	4.56486e+07	4.86162e+07	7.11733e+07	6.96484e+07	1.04158e+08	3.91005e+07	71344996	4.24056e+07	9.59583e+07	4.663e+07	5.54939e+07	4.06652e+07	5.97445e+07	3.35891e+07
F1M820	Sorbin and SH3 domain-containing protein 1 OS=Rattus norvegicus OX=10116 GN=Sorbs1 PE=1 SV=1	4.96775e+07	4.64177e+07	4.88021e+07	4.97402e+07	7.83258e+07	6.58243e+07	6.01974e+07	6.94724e+07	6.8222e+07	5.99715e+07	5.98022e+07	5.88097e+07	5.40545e+07	5.39561e+07	5.4095e+07
G3V940	Coronin OS=Rattus norvegicus OX=10116 GN=Coro1b PE=1 SV=1	2.39704e+08	2.63035e+08	2.71024e+08	2.56275e+08	2.44336e+08	2.44022e+08	2.36607e+08	258366956	2.54852e+08	2.22496e+08	2.1519e+08	2.20312e+08	2.49195e+08	2.46375e+08	2.23871e+08
Q4KM74	Vesicle-trafficking protein SEC22b OS=Rattus norvegicus OX=10116 GN=Sec22b PE=1 SV=3	1.7702e+08	1.76513e+08	1.70809e+08	1.75523e+08	1.85029e+08	1.62395e+08	1.68116e+08	173632097	1.63642e+08	1.79669e+08	1.75371e+08	1.6948e+08	1.71559e+08	1.59332e+08	1.83456e+08
D3ZX63	Similar to D3Mm3e (Predicted), isoform CRA_a OS=Rattus norvegicus OX=10116 GN=Wdr54 PE=4 SV=1	3.31731e+07	4.9003e+07	5.04985e+07	4.99279e+07	4.30188e+07	4.52162e+07	4.59059e+07	3.69765e+07	3.82007e+07	5.19285e+07	3.41492e+07	4.84963e+07	5.44453e+07	5.06552e+07	5.70467e+07
G3V6L0	Pro-MCH OS=Rattus norvegicus OX=10116 GN=Pmch PE=4 SV=1	1.69995e+08	1.96255e+08	2.21451e+08	2.00763e+08	2.03204e+08	1.58411e+08	1.85676e+08	1.76798e+08	1.77153e+08	1.26422e+08	1.56183e+08	1.14205e+08	1.93843e+08	2.00285e+08	2.1141e+08
F1MAA2	COP9 signalosome subunit 7A OS=Rattus norvegicus OX=10116 GN=Cops7a PE=1 SV=1	1.73817e+08	1.61893e+08	2.09831e+08	1.75237e+08	1.88356e+08	1.23334e+08	1.42167e+08	1.74002e+08	1.61211e+08	1.8414e+08	1.81162e+08	1.65386e+08	1.74189e+08	2.10222e+08	1.73144e+08
Q5PPK9	EARP-interacting protein OS=Rattus norvegicus OX=10116 GN=Eipr1 PE=1 SV=1	6.47997e+07	6.30262e+07	6.63896e+07	5.73524e+07	6.09182e+07	6.41186e+07	7.28925e+07	73945867	5.93144e+07	6.48455e+07	6.94389e+07	5.71639e+07	7.06323e+07	9.04644e+07	8.27503e+07
P52555	Endoplasmic reticulum resident protein 29 OS=Rattus norvegicus OX=10116 GN=Erp29 PE=1 SV=2	5.1388e+08	5.43306e+08	5.47777e+08	4.20422e+08	3.83815e+08	4.84256e+08	5.13506e+08	5.39369e+08	4.62851e+08	4.23665e+08	4.84469e+08	4.06053e+08	5.1722e+08	3.73517e+08	5.21173e+08
M0R7V3	MICOS complex subunit OS=Rattus norvegicus OX=10116 GN=Apoo PE=1 SV=2	3.11356e+08	2.77097e+08	3.34455e+08	2.71522e+08	2.91341e+08	2.87555e+08	2.80881e+08	2.48312e+08	2.75877e+08	3.01129e+08	3.05343e+08	3.22755e+08	3.04763e+08	2.99341e+08	2.95206e+08
Q794E4	Heterogeneous nuclear ribonucleoprotein F OS=Rattus norvegicus OX=10116 GN=Hnrnpf PE=1 SV=3	8.38849e+07	7.6317e+07	8.77699e+07	8.02513e+07	7.61108e+07	8.34002e+07	8.45297e+07	9.27507e+07	7.60313e+07	7.40552e+07	6.64642e+07	6.56086e+07	7.39721e+07	7.85327e+07	8.9972e+07
M0R9Q1	RCG48334, isoform CRA_e OS=Rattus norvegicus OX=10116 GN=Rbm14 PE=1 SV=1	8.9762e+07	9.81922e+07	9.95863e+07	1.06182e+08	1.06268e+08	7.60444e+07	1.02502e+08	9.78259e+07	8.22235e+07	1.12503e+08	1.1125e+08	9.65217e+07	8.89825e+07	9.49004e+07	7.84975e+07
B0BNM1	NAD(P)H-hydrate epimerase OS=Rattus norvegicus OX=10116 GN=Naxe PE=2 SV=1	2.59187e+08	2.74339e+08	2.77484e+08	2.5844e+08	2.55992e+08	2.42473e+08	2.60396e+08	2.44416e+08	2.49332e+08	2.62093e+08	2.36977e+08	2.32687e+08	2.68982e+08	2.60361e+08	2.82211e+08
A0A0G2JXI9	Histone H2B OS=Rattus norvegicus OX=10116 GN=Hist1h2bo PE=3 SV=1	1.00645e+09	9.58666e+08	1.04531e+09	9.79986e+08	1.07231e+09	1.03976e+09	9.36941e+08	1118654560	1.12859e+09	9.01889e+08	9.24555e+08	8.90048e+08	9.11712e+08	9.27723e+08	9.02021e+08
D3ZF86	ARFGEF family member 3 OS=Rattus norvegicus OX=10116 GN=Arfgef3 PE=1 SV=3	9.22773e+07	9.15948e+07	8.54883e+07	9.74005e+07	1.00693e+08	7.42449e+07	9.25705e+07	7.13509e+07	7.24796e+07	9.34563e+07	8.02729e+07	9.00061e+07	9.43112e+07	9.62211e+07	9.9102e+07
D3Z9Z0	Ankyrin 1 OS=Rattus norvegicus OX=10116 GN=Ank1 PE=1 SV=1	7.85492e+07	6.31437e+07	8.128e+07	6.1613e+07	7.22858e+07	6.9621e+07	5.60456e+07	6.31539e+07	8.21116e+07	4.65043e+07	6.02448e+07	4.52509e+07	7.86937e+07	5.72816e+07	5.54144e+07
F1M3P6	Protein SCAI OS=Rattus norvegicus OX=10116 GN=Scai PE=1 SV=2	9.88284e+07	9.8172e+07	8.16308e+07	1.06366e+08	1.17345e+08	9.83832e+07	8.24397e+07	9.70113e+07	1.08622e+08	1.32446e+08	1.0359e+08	1.19772e+08	1.03574e+08	1.02068e+08	9.81893e+07
F1LPA6	Peptidyl arginine deiminase, type II, isoform CRA_a OS=Rattus norvegicus OX=10116 GN=Padi2 PE=4 SV=2	4.63057e+07	5.34196e+07	5.04514e+07	5.85194e+07	6.21303e+07	5.19051e+07	4.63052e+07	58490396	3.48452e+07	5.77633e+07	7.87791e+07	4.84426e+07	5.5841e+07	7.89024e+07	6.86859e+07
D3ZER6	Transportin 2 OS=Rattus norvegicus OX=10116 GN=Tnpo2 PE=1 SV=2	4.91003e+07	4.99625e+07	5.73238e+07	6.84213e+07	4.82168e+07	4.68253e+07	4.93081e+07	4.77626e+07	3.93971e+07	6.23351e+07	4.73923e+07	5.8431e+07	5.06755e+07	5.65145e+07	6.53419e+07
A0A0G2KAW5	WD repeat domain 48 OS=Rattus norvegicus OX=10116 GN=Wdr48 PE=1 SV=1	8.38206e+07	9.79451e+07	8.41136e+07	1.126e+08	7.41807e+07	7.1105e+07	8.17651e+07	8.67305e+07	7.13284e+07	7.90173e+07	7.45509e+07	7.33194e+07	6.73868e+07	6.69821e+07	9.46588e+07
B5DFM3	Ly6h protein (Fragment) OS=Rattus norvegicus OX=10116 GN=Ly6h PE=2 SV=1	1.13695e+09	1.24629e+09	1.12732e+09	1.09788e+09	1.04971e+09	1.04064e+09	1.08767e+09	9.86138e+08	1.01095e+09	1.20798e+09	1.16299e+09	9.53053e+08	1.08756e+09	1.06635e+09	1.14855e+09
P69682	Adaptin ear-binding coat-associated protein 1 OS=Rattus norvegicus OX=10116 GN=Necap1 PE=1 SV=1	4.80054e+08	5.2693e+08	5.01669e+08	4.51266e+08	5.30911e+08	4.52283e+08	4.72528e+08	439903374	4.75497e+08	5.02646e+08	4.75294e+08	4.20833e+08	5.03546e+08	4.73634e+08	5.10285e+08
F7EYB9	Oligodendrocyte-myelin glycoprotein OS=Rattus norvegicus OX=10116 GN=Omg PE=1 SV=1	9.96487e+08	1.07022e+09	1.05529e+09	1.08594e+09	1.06098e+09	9.97595e+08	9.31691e+08	1022163459	1.06099e+09	1.03424e+09	1.03345e+09	1.02593e+09	1.03372e+09	1.04746e+09	1.06605e+09
Q63450	Calcium/calmodulin-dependent protein kinase type 1 OS=Rattus norvegicus OX=10116 GN=Camk1 PE=1 SV=2	2.56249e+07	2.93765e+07	3.111e+07	2.58236e+07	1.95047e+07	3.20582e+07	3.09028e+07	3.0563e+07	4.0475e+07	4.97247e+07	4.3873e+07	3.43147e+07	3.93098e+07	2.93644e+07	3.12749e+07
P19945	60S acidic ribosomal protein P0 OS=Rattus norvegicus OX=10116 GN=Rplp0 PE=1 SV=2	4.7967e+08	4.60148e+08	4.78514e+08	4.40091e+08	4.54504e+08	3.43504e+08	4.89113e+08	482725806	4.695e+08	5.03224e+08	4.72054e+08	4.54657e+08	4.67612e+08	4.88186e+08	3.55655e+08
Q4QQV3	Protein FAM162A OS=Rattus norvegicus OX=10116 GN=Fam162a PE=2 SV=1	1.90761e+08	2.12896e+08	2.23536e+08	2.13329e+08	1.9528e+08	1.55373e+08	1.9724e+08	1.76362e+08	1.93816e+08	1.96478e+08	2.06844e+08	1.98824e+08	2.25344e+08	1.99308e+08	2.19743e+08
F1LPP6	A-kinase anchor protein 5 OS=Rattus norvegicus OX=10116 GN=Akap5 PE=1 SV=1	3.03509e+07	5.03487e+06	4.00141e+06	3.37754e+06	4.32319e+06	9.81412e+06	4.56976e+07	4.0183e+06	1.94054e+08	4.33588e+07	4.27834e+07	3.63995e+06	4.73464e+06	4.21508e+06	4.88494e+06
G3V9N0	Polyadenylate-binding protein OS=Rattus norvegicus OX=10116 GN=Pabpc4 PE=1 SV=2	6.27474e+07	6.62493e+07	7.01577e+07	6.23705e+07	5.99239e+07	1.09264e+08	4.89393e+07	72178632	6.64593e+07	6.79819e+07	6.57252e+07	1.0255e+08	6.8177e+07	1.09439e+08	1.31395e+08
P06214	Delta-aminolevulinic acid dehydratase OS=Rattus norvegicus OX=10116 GN=Alad PE=1 SV=1	7.4247e+07	8.27322e+07	7.87273e+07	7.25192e+07	6.97725e+07	6.15279e+07	6.79155e+07	71501553	4.15171e+07	7.05239e+07	6.10006e+07	6.93475e+07	6.59482e+07	7.25754e+07	7.21181e+07
F1M3H8	Hypothetical protein LOC681410 OS=Rattus norvegicus OX=10116 GN=LOC681410 PE=1 SV=3	1.01749e+08	9.85906e+07	8.00937e+07	7.95381e+07	1.00078e+08	9.44181e+07	1.2452e+08	102965589	9.31131e+07	1.41044e+08	1.12701e+08	8.61907e+07	8.92586e+07	1.02981e+08	8.07744e+07
P01179	Oxytocin-neurophysin 1 OS=Rattus norvegicus OX=10116 GN=Oxt PE=1 SV=2	2.4457e+08	1.62074e+08	1.90266e+08	2.59593e+08	1.93514e+08	1.83583e+08	1.39684e+08	2.04257e+08	1.52219e+08	5.60383e+08	2.26725e+08	2.60166e+08	1.745e+08	1.98991e+08	1.82589e+08
Q5U2U2	Crk-like protein OS=Rattus norvegicus OX=10116 GN=Crkl PE=1 SV=1	5.73896e+07	7.54335e+07	9.14485e+07	7.14582e+07	8.96419e+07	6.79721e+07	8.96952e+07	8.39584e+07	7.94181e+07	8.12546e+07	6.64086e+07	7.73737e+07	6.91038e+07	6.74581e+07	7.73438e+07
D4A2V0	Neuronal growth regulator 1 OS=Rattus norvegicus OX=10116 GN=Negr1 PE=4 SV=3	6.82092e+08	7.04167e+08	7.19894e+08	7.12237e+08	7.09017e+08	6.90785e+08	6.76018e+08	596905786	6.29764e+08	7.49574e+08	7.26142e+08	6.74114e+08	6.803e+08	6.91175e+08	6.80422e+08
Q62651	Delta(3,5)-Delta(2,4)-dienoyl-CoA isomerase, mitochondrial OS=Rattus norvegicus OX=10116 GN=Ech1 PE=1 SV=2	3.43428e+08	3.73576e+08	3.62921e+08	3.11697e+08	3.65327e+08	3.85339e+08	3.87173e+08	327630832	3.20388e+08	4.03514e+08	3.85612e+08	3.80515e+08	3.77247e+08	3.49697e+08	3.63077e+08
A2VD09	Abi1 protein OS=Rattus norvegicus OX=10116 GN=Abi1 PE=1 SV=1	5.95653e+07	6.31863e+07	6.76217e+07	5.65209e+07	6.69116e+07	5.81739e+07	5.65857e+07	64446393	8.61657e+07	5.64747e+07	6.03187e+07	5.88418e+07	5.05409e+07	5.545e+07	5.9344e+07
Q3B7U9	Peptidyl-prolyl cis-trans isomerase FKBP8 OS=Rattus norvegicus OX=10116 GN=Fkbp8 PE=2 SV=1	1.36358e+08	1.15787e+08	1.29656e+08	8.95161e+07	1.24298e+08	1.03414e+08	1.27822e+08	134041460	1.17499e+08	6.73244e+07	1.10083e+08	9.7716e+07	6.59471e+07	1.19899e+08	1.28447e+08
E9PSU5	Uncharacterized protein OS=Rattus norvegicus OX=10116 PE=1 SV=2												5.66767e+07			7.98818e+07
P20761	Ig gamma-2B chain C region OS=Rattus norvegicus OX=10116 GN=Igh-1a PE=1 SV=1	1.54939e+08	1.40839e+08	1.57077e+08	1.75144e+08	1.22196e+08	1.04606e+08	1.82732e+08	1.93123e+08	1.451e+08	6.62103e+07	6.77006e+07	4.97285e+07	1.67375e+08	3.07016e+08	1.26799e+08
F1LZX7	60S ribosomal protein L17 OS=Rattus norvegicus OX=10116 GN=Rpl17 PE=1 SV=2	3.48879e+08	3.57092e+08	3.60886e+08	3.30348e+08	3.23026e+08	3.29981e+08	3.55684e+08	345163726	3.51759e+08	3.2598e+08	3.32309e+08	3.14707e+08	3.29795e+08	3.21094e+08	3.28136e+08
Q499R1	Ppp2r5d protein (Fragment) OS=Rattus norvegicus OX=10116 GN=Ppp2r5d PE=2 SV=1	3.61889e+08	3.26329e+08	3.48553e+08	3.68242e+08	3.20519e+08	3.20689e+08	3.43509e+08	333245942	3.47326e+08	3.2085e+08	2.90088e+08	2.59951e+08	3.2357e+08	3.02116e+08	3.45595e+08
A0A0F7R5I4	Alanine/serine/cysteine/threonine transporter 1 OS=Rattus norvegicus OX=10116 GN=ratASCT1 PE=2 SV=1	2.16983e+08	2.24086e+08	1.99649e+08	2.18553e+08	2.36666e+08	1.90015e+08	2.14079e+08	175110310	1.96449e+08	2.61318e+08	2.22227e+08	2.03149e+08	2.17316e+08	2.04822e+08	2.12163e+08
D3ZFB6	Proline-rich transmembrane protein 2 OS=Rattus norvegicus OX=10116 GN=Prrt2 PE=1 SV=1	5.25139e+07	3.09062e+07	5.59818e+07	7.84449e+07	9.59054e+07	1.68533e+08	5.09011e+07	46485941	4.807e+07	1.47968e+08	1.46173e+08	1.31022e+08	6.42395e+07	5.61477e+07	5.78549e+07
P70565	Plakoglobin OS=Rattus norvegicus OX=10116 PE=2 SV=1	1.56252e+07	8.74981e+06	1.65971e+07	5.40938e+06	1.08505e+07	7.62975e+06	1.72794e+07	10645073	1.68668e+07	1.25652e+07	6.18884e+06	1.61914e+07	1.41162e+07	1.58477e+07	1.13128e+07
Q9QZ86	Nucleolar protein 58 OS=Rattus norvegicus OX=10116 GN=Nop58 PE=1 SV=1	6.15974e+07	6.26925e+07	6.11305e+07	6.6145e+07	5.48669e+07	5.57825e+07	6.07171e+07	5.60978e+07	4.99066e+07	6.05761e+07	5.22581e+07	5.51043e+07	5.30026e+07	6.33835e+07	5.93228e+07
P05982	NAD(P)H dehydrogenase [quinone] 1 OS=Rattus norvegicus OX=10116 GN=Nqo1 PE=1 SV=4	3.0581e+08	3.32707e+08	3.49024e+08	3.24716e+08	3.08132e+08	3.31073e+08	2.87433e+08	3.27055e+08	2.40826e+08	2.98452e+08	2.30446e+08	2.66605e+08	3.14144e+08	3.64977e+08	3.4941e+08
D3Z941	Methionyl-tRNA synthetase OS=Rattus norvegicus OX=10116 GN=Mars PE=1 SV=1	1.00975e+08	1.0362e+08	8.78415e+07	7.70804e+07	7.73626e+07	9.47874e+07	8.35473e+07	82356500	7.41781e+07	1.04886e+08	9.29143e+07	8.22595e+07	9.1444e+07	7.9989e+07	8.28942e+07
Q812E9	Neuronal membrane glycoprotein M6-a OS=Rattus norvegicus OX=10116 GN=Gpm6a PE=1 SV=1	1.14393e+09	1.24058e+09	1.29539e+09	1.20257e+09	1.24987e+09	1.35383e+09	1.13491e+09	1.15117e+09	1.46664e+09	1.38167e+09	1.2347e+09	1.14807e+09	1.30129e+09	1.12343e+09	1.25347e+09
Q62733	Lamina-associated polypeptide 2, isoform beta OS=Rattus norvegicus OX=10116 GN=Tmpo PE=1 SV=3	1.1665e+08	1.28572e+08	1.22563e+08	1.41651e+08	1.28549e+08	1.37311e+08	1.40468e+08	1.50208e+08	1.36912e+08	1.44979e+08	1.31376e+08	1.08673e+08	1.16849e+08	1.09577e+08	1.4218e+08
Q6AYK3	Inositol-3-phosphate synthase 1 OS=Rattus norvegicus OX=10116 GN=Isyna1 PE=3 SV=2	2.39039e+08	2.09018e+08	2.37347e+08	2.14662e+08	2.04066e+08	1.87774e+08	2.21109e+08	2.33406e+08	1.99339e+08	2.28829e+08	2.26601e+08	2.40317e+08	2.56919e+08	2.3634e+08	2.51095e+08
G3V714	Neuroendocrine protein 7B2 OS=Rattus norvegicus OX=10116 GN=Scg5 PE=1 SV=3	1.61554e+08	1.54641e+08	1.91049e+08	1.77662e+08	1.61397e+08	1.62808e+08	1.6616e+08	1.5818e+08	1.34374e+08	2.02998e+08	1.55134e+08	1.83294e+08	1.73275e+08	1.9674e+08	1.83182e+08
O08730	Glycogenin-1 OS=Rattus norvegicus OX=10116 GN=Gyg1 PE=2 SV=4	8.48469e+07	8.75363e+07	7.79836e+07	8.59853e+07	8.43934e+07	8.35619e+07	8.80319e+07	8.65085e+07	7.60056e+07	9.70928e+07	7.94001e+07	9.26365e+07	7.4573e+07	8.29474e+07	9.82136e+07
F1LPT0	Gap junction protein OS=Rattus norvegicus OX=10116 GN=Gjc3 PE=1 SV=1	9.0498e+07	9.11963e+07	7.90515e+07	9.29553e+07	9.3156e+07	8.85944e+07	8.90343e+07	101949796	9.64339e+07	7.66625e+07	1.22645e+08	1.6781e+08	9.94358e+07	9.19158e+07	9.91611e+07
D3ZK97	Histone H3 OS=Rattus norvegicus OX=10116 GN=H3f3c PE=3 SV=1	5.02846e+07	6.90894e+07	4.02267e+07	1.41918e+07	7.3009e+07	3.7454e+07	7.72617e+07	3.98594e+07	1.03497e+08	1.09908e+08	1.15542e+08	5.96655e+07	3.0038e+07	3.56101e+07	2.61339e+07
Q99MI7	NEDD8-activating enzyme E1 catalytic subunit OS=Rattus norvegicus OX=10116 GN=Uba3 PE=1 SV=1	1.18941e+08	1.42205e+08	1.22378e+08	1.17779e+08	7.78508e+07	1.23299e+08	6.70453e+07	1.07217e+08	1.0563e+08	1.10488e+08	8.5656e+07	6.96131e+07	1.27672e+08	1.26163e+08	7.37397e+07
Q9R0I8	Phosphatidylinositol 5-phosphate 4-kinase type-2 alpha OS=Rattus norvegicus OX=10116 GN=Pip4k2a PE=1 SV=1	1.31467e+07	2.35707e+07	1.47771e+07	3.11867e+07	1.19617e+07	1.31916e+07	1.16569e+07	2.10304e+07	2.7227e+07	2.40604e+07	1.63054e+07	2.49588e+07	2.19966e+07	2.59387e+07	2.68245e+07
D3ZCG3	MON2 homolog, regulator of endosome-to-Golgi-trafficking OS=Rattus norvegicus OX=10116 GN=Mon2 PE=1 SV=3	3.36961e+07	3.17965e+07	3.7668e+07	2.78205e+07	3.14668e+07	2.91457e+07	3.4336e+07	3.05398e+07	3.11716e+07	3.82484e+07	3.16544e+07	3.09307e+07	3.85687e+07	3.73596e+07	3.31572e+07
M0RDJ4	Glia maturation factor beta OS=Rattus norvegicus OX=10116 GN=Gmfb PE=1 SV=2	3.95622e+07	3.60183e+07	2.15156e+07	2.01984e+07	3.77526e+07	3.22327e+07	3.64228e+07	2.09593e+07	4.19698e+07	4.12213e+07	3.31449e+07	2.99009e+07	3.10577e+07	3.28869e+07	3.20528e+07
Q32PY7	Nudcd3 protein OS=Rattus norvegicus OX=10116 GN=Nudcd3 PE=2 SV=1	3.59415e+07	3.88561e+07	4.30708e+07	4.39268e+07	4.50012e+07	3.53334e+07	4.38504e+07	45954732	4.01117e+07	4.05464e+07	3.78119e+07	2.37997e+07	4.50455e+07	4.80769e+07	4.86769e+07
A0A096MKG5	NAD kinase 2, mitochondrial OS=Rattus norvegicus OX=10116 GN=Nadk2 PE=1 SV=1	1.20854e+08	1.19586e+08	1.39947e+08	1.11909e+08	8.99603e+07	9.08091e+07	9.47505e+07	107048221	1.07294e+08	1.18938e+08	7.80728e+07	9.09761e+07	1.28177e+08	1.06538e+08	1.45817e+08
A0A0G2K8H0	Caprin-1 OS=Rattus norvegicus OX=10116 GN=Caprin1 PE=1 SV=1	8.83302e+07	9.66211e+07	8.62168e+07	8.41093e+07	9.62899e+07	9.375e+07	8.47396e+07	8.39244e+07	1.10681e+08	9.93301e+07	9.01958e+07	7.24132e+07	8.32113e+07	8.06864e+07	8.34766e+07
A0A140TAJ3	Far upstream element-binding protein 1 OS=Rattus norvegicus OX=10116 GN=Fubp1 PE=1 SV=1	1.20473e+08	1.2562e+08	9.33171e+07	1.27169e+08	1.15695e+08	7.93716e+07	1.19042e+08	1.2854e+08	1.12641e+08	1.27898e+08	1.19871e+08	9.69289e+07	7.85556e+07	9.88256e+07	1.05815e+08
Q91XV6	FXYD domain-containing ion transport regulator 6 OS=Rattus norvegicus OX=10116 GN=Fxyd6 PE=1 SV=1	1.92144e+08	2.19798e+08	2.23619e+08	2.02895e+08	2.06264e+08	1.57134e+08	1.90975e+08	1.8909e+08	1.51751e+08	2.60736e+08	1.89879e+08	1.81569e+08	2.22055e+08	2.00862e+08	2.40859e+08
D3ZHX3	DIRAS family GTPase 2 OS=Rattus norvegicus OX=10116 GN=Diras2 PE=4 SV=1	1.25393e+08	1.32781e+08	1.12657e+08	1.38157e+08	1.10688e+08	1.2282e+08	1.49433e+08	132119267	1.65343e+08	1.16363e+08	1.01094e+08	1.41637e+08	1.38907e+08	1.27082e+08	1.10654e+08
A0A0H2UI21	Carnitine O-acetyltransferase OS=Rattus norvegicus OX=10116 GN=Crat PE=1 SV=1	8.58736e+07	1.66653e+08	8.05567e+07	1.30461e+08	8.30181e+07	7.92286e+07	1.60047e+08	1.66148e+08	8.60071e+07	1.0519e+08	1.45045e+08	8.66022e+07	8.96337e+07	1.51211e+08	1.61587e+08
A0A0G2JVB0	Solute carrier family 2, facilitated glucose transporter member 3 OS=Rattus norvegicus OX=10116 GN=Slc2a3 PE=1 SV=1	3.85485e+08	4.02278e+08	3.758e+08	3.70755e+08	3.55484e+08	3.32383e+08	3.65888e+08	337348098	3.95692e+08	3.6602e+08	3.63659e+08	3.47798e+08	4.14005e+08	3.57489e+08	4.09608e+08
Q8K4Y5	Leucine-rich glioma-inactivated protein 1 OS=Rattus norvegicus OX=10116 GN=Lgi1 PE=1 SV=1	3.93549e+08	3.89383e+08	3.8972e+08	3.43811e+08	3.84255e+08	3.20786e+08	3.76492e+08	3.46988e+08	4.91983e+08	3.93808e+08	3.79336e+08	3.63012e+08	3.80563e+08	3.61457e+08	3.74437e+08
D3ZNZ9	Histone H2B OS=Rattus norvegicus OX=10116 GN=Hist3h2ba PE=3 SV=1	3.52998e+07	3.46964e+07	3.10058e+07	3.28522e+07	3.07182e+07	2.74724e+07	2.93913e+07	29620260	3.24392e+07	2.22841e+07	2.8586e+07	1.65432e+07	2.44398e+07	1.89885e+07	2.95907e+07
D4A1U8	Similar to RIKEN cDNA 5830475I06 OS=Rattus norvegicus OX=10116 GN=RGD1311744 PE=1 SV=3	1.28259e+08	1.18551e+08	1.39769e+08	1.01284e+08	9.01589e+07	1.03178e+08	8.76881e+07	1.08905e+08	8.02387e+07	1.2141e+08	1.17197e+08	8.57568e+07	1.13229e+08	1.15493e+08	1.09827e+08
F1LNJ2	U5 small nuclear ribonucleoprotein 200 kDa helicase OS=Rattus norvegicus OX=10116 GN=Snrnp200 PE=1 SV=1	7.71063e+07	8.16034e+07	8.25636e+07	4.53807e+07	4.37118e+07	4.43408e+07	3.83497e+07	6.96422e+07	3.75598e+07	4.01589e+07	4.38012e+07	3.92693e+07	6.92292e+07	3.95363e+07	3.99672e+07
F1SW39	PC4 and SFRS1 interacting protein 1 OS=Rattus norvegicus OX=10116 GN=Psip1 PE=1 SV=1	7.02772e+07	8.03453e+07	7.73858e+07	6.26749e+07	6.43946e+07	5.63355e+07	6.4365e+07	59327499	1.24672e+08	5.29239e+07	2.95081e+07	4.30852e+07	6.85577e+07	6.62105e+07	7.95554e+07
F1M978	Inositol-1-monophosphatase OS=Rattus norvegicus OX=10116 GN=Impa1 PE=1 SV=1	5.9354e+08	5.83389e+08	6.21983e+08	5.93443e+08	5.48424e+08	5.83064e+08	5.45422e+08	5.70857e+08	6.05014e+08	6.09874e+08	5.70793e+08	6.10944e+08	5.95024e+08	6.12433e+08	6.00183e+08
Q5BKC9	Ephexin-1 OS=Rattus norvegicus OX=10116 GN=Ngef PE=1 SV=2	7.67782e+07	8.70631e+07	8.44877e+07	6.74339e+07	6.11782e+07	5.29003e+07	8.05052e+07	6.19364e+07	1.76925e+08	9.02931e+07	7.30317e+07	5.67868e+07	7.28297e+07	8.01132e+07	8.26388e+07
Q68G11	Casein kinase II subunit beta OS=Rattus norvegicus OX=10116 GN=Csnk2b PE=1 SV=2	1.71829e+08	1.74575e+08	1.81973e+08	1.74855e+08	1.70484e+08	1.76249e+08	1.52777e+08	1.92422e+08	2.10119e+08	1.63817e+08	1.65023e+08	1.50591e+08	1.7743e+08	1.7421e+08	1.68937e+08
P52759	2-iminobutanoate/2-iminopropanoate deaminase OS=Rattus norvegicus OX=10116 GN=Rida PE=1 SV=3	5.18772e+08	5.45505e+08	5.03303e+08	4.67355e+08	3.73891e+08	5.36123e+08	3.85559e+08	5.24346e+08	3.33256e+08	6.10258e+08	3.98402e+08	5.87468e+08	4.1316e+08	5.56238e+08	5.50584e+08
Q4QQS3	Protein OSCP1 OS=Rattus norvegicus OX=10116 GN=Oscp1 PE=2 SV=1	4.80581e+08	4.79467e+08	4.46992e+08	4.75901e+08	5.02497e+08	4.27886e+08	4.82762e+08	4.35065e+08	3.91869e+08	5.37688e+08	4.2101e+08	4.23934e+08	4.67756e+08	4.46897e+08	5.08466e+08
F1LMD9	Cyclin-G-associated kinase OS=Rattus norvegicus OX=10116 GN=Gak PE=1 SV=1	6.6267e+07	6.27299e+07	6.36847e+07	6.42774e+07	5.64737e+07	5.47803e+07	4.49544e+07	6.86016e+07	5.61966e+07	6.9252e+07	6.10873e+07	5.35436e+07	4.72873e+07	5.32025e+07	5.7568e+07
P61972	Nuclear transport factor 2 OS=Rattus norvegicus OX=10116 GN=Nutf2 PE=1 SV=1	1.56887e+08	2.88928e+08	3.06356e+08	2.38543e+08	2.73495e+08	2.70768e+08	2.91354e+08	273049294	2.60757e+08	2.60979e+08	2.77119e+08	2.19047e+08	2.26412e+08	2.31241e+08	2.30212e+08
F1LP30	Methylcrotonoyl-CoA carboxylase subunit alpha, mitochondrial OS=Rattus norvegicus OX=10116 GN=Mccc1 PE=1 SV=1	7.20459e+07	6.65286e+07	6.86006e+07	7.26428e+07	6.75926e+07	4.90255e+07	6.8925e+07	6.58351e+07	3.48125e+07	7.57412e+07	5.84563e+07	5.15897e+07	7.38135e+07	7.54048e+07	7.0534e+07
Q6AYD5	Eukaryotic peptide chain release factor GTP-binding subunit ERF3B-like OS=Rattus norvegicus OX=10116 GN=Gspt1 PE=1 SV=1	9.36456e+07	1.12308e+08	1.1385e+08	1.015e+08	9.60258e+07	1.10532e+08	9.68782e+07	96020662	1.01051e+08	6.39228e+07	1.04224e+08	1.07761e+08	9.40267e+07	1.04405e+08	1.09163e+08
Q6MG06	Guanine nucleotide-binding protein-like 1 OS=Rattus norvegicus OX=10116 GN=Gnl1 PE=1 SV=1	1.21563e+08	1.34737e+08	1.22301e+08	1.19075e+08	1.08854e+08	1.11823e+08	1.33777e+08	1.27931e+08	1.25017e+08	1.29382e+08	1.26824e+08	1.04686e+08	1.24319e+08	1.2485e+08	1.1895e+08
Q5RJK6	Inositol polyphosphate-1-phosphatase OS=Rattus norvegicus OX=10116 GN=Inpp1 PE=1 SV=1	1.44816e+08	1.49656e+08	1.569e+08	1.61229e+08	1.25788e+08	1.18773e+08	1.39213e+08	1.26377e+08	9.87777e+07	1.33651e+08	1.35599e+08	1.3645e+08	1.46064e+08	1.1681e+08	1.25533e+08
P40112	Proteasome subunit beta type-3 OS=Rattus norvegicus OX=10116 GN=Psmb3 PE=1 SV=1	1.90882e+08	2.06615e+08	1.87354e+08	1.80733e+08	1.96403e+08	1.60058e+08	2.02914e+08	184966766	1.76318e+08	2.28247e+08	1.97859e+08	1.98995e+08	1.97245e+08	1.77602e+08	1.93745e+08
Q6DGG1	Protein ABHD14B OS=Rattus norvegicus OX=10116 GN=Abhd14b PE=2 SV=1	4.08316e+08	3.72142e+08	3.36854e+08	3.5821e+08	3.26082e+08	2.8242e+08	2.54788e+08	300514643	2.95687e+08	4.22722e+08	3.02911e+08	3.82305e+08	3.23298e+08	4.36674e+08	2.84493e+08
Q3KRE2	Methyltransferase like 7A, isoform CRA_b OS=Rattus norvegicus OX=10116 GN=Mettl7a PE=1 SV=1	1.57934e+08	1.47455e+08	1.73894e+08	1.94849e+08	1.68565e+08	1.96927e+08	1.70074e+08	206575285	1.61855e+08	9.61691e+07	9.48857e+07	1.06098e+08	1.6824e+08	1.68574e+08	1.52667e+08
P62332	ADP-ribosylation factor 6 OS=Rattus norvegicus OX=10116 GN=Arf6 PE=1 SV=2	1.53723e+08	1.70473e+08	1.59899e+08	1.55519e+08	1.55614e+08	1.29992e+08	1.61066e+08	1.43329e+08	1.66726e+08	1.90863e+08	1.58842e+08	1.51895e+08	1.6245e+08	1.60922e+08	1.64774e+08
G3V9P7	Huntingtin OS=Rattus norvegicus OX=10116 GN=Htt PE=1 SV=1	9.54374e+07	9.09607e+07	9.74258e+07	8.97312e+07	8.94215e+07	6.91519e+07	9.42211e+07	90901700	9.53779e+07	4.43457e+07	8.68401e+07	8.95619e+07	8.90271e+07	9.27574e+07	8.99819e+07
M0R809	Guanine nucleotide-binding protein subunit gamma OS=Rattus norvegicus OX=10116 GN=Gng4 PE=3 SV=1	2.29435e+08	2.51583e+08	2.45794e+08	2.50663e+08	2.53285e+08	2.46478e+08	2.47516e+08	214993771	2.3831e+08	2.87351e+08	2.5127e+08	2.56019e+08	2.58726e+08	2.41537e+08	2.63671e+08
Q6AY23	Pyrroline-5-carboxylate reductase 2 OS=Rattus norvegicus OX=10116 GN=Pycr2 PE=2 SV=1	1.60962e+08	1.62132e+08	1.62304e+08	1.67441e+08	1.53061e+08	1.44942e+08	1.5003e+08	1.52719e+08	1.318e+08	1.65568e+08	1.44621e+08	1.54007e+08	1.71145e+08	1.62229e+08	1.46219e+08
P47971	Neuronal pentraxin-1 OS=Rattus norvegicus OX=10116 GN=Nptx1 PE=1 SV=1	6.35116e+07	6.93147e+07	6.68563e+07	6.16771e+07	7.89444e+07	5.44736e+07	6.3084e+07	5.69996e+07	9.14729e+07	9.01936e+07	7.85185e+07	7.28936e+07	7.19139e+07	6.66801e+07	9.15775e+07
Q3KRE0	ATPase family AAA domain-containing protein 3 OS=Rattus norvegicus OX=10116 GN=Atad3 PE=1 SV=1	1.63812e+08	1.5303e+08	1.76545e+08	1.54924e+08	1.3907e+08	1.03806e+08	1.38458e+08	1.38575e+08	1.25347e+08	1.11205e+08	1.53032e+08	1.55325e+08	1.52986e+08	1.70396e+08	1.63389e+08
B5DFN4	Prefoldin 5 (Predicted), isoform CRA_a OS=Rattus norvegicus OX=10116 GN=Pfdn5 PE=1 SV=1	2.14151e+08	1.97434e+08	1.87935e+08	1.91035e+08	1.97171e+08	1.91424e+08	2.14681e+08	1.99209e+08	1.80276e+08	2.01091e+08	1.90474e+08	2.05583e+08	1.94676e+08	1.68477e+08	1.4367e+08
P18422	Proteasome subunit alpha type-3 OS=Rattus norvegicus OX=10116 GN=Psma3 PE=1 SV=3	5.95259e+08	5.87469e+08	6.20524e+08	6.55271e+08	6.92539e+08	5.90865e+08	5.39726e+08	608549004	5.07022e+08	7.05645e+08	6.3327e+08	6.30053e+08	6.46973e+08	6.4396e+08	6.29075e+08
Q64244	ADP-ribosyl cyclase/cyclic ADP-ribose hydrolase 1 OS=Rattus norvegicus OX=10116 GN=Cd38 PE=1 SV=1	2.61635e+08	2.84146e+08	3.13822e+08	2.9111e+08	2.97597e+08	2.8092e+08	2.99016e+08	2.85579e+08	2.05648e+08	3.22648e+08	3.55781e+08	4.06922e+08	2.74909e+08	2.73268e+08	3.46113e+08
[truncated: 2,990 more rows]
